# Supplementary material for: Age targeting and scale-up of voluntary medical male circumcision in Mozambique
Source: PLoS One. 2019 Feb 22;14(2):e0211958. doi: 10.1371/journal.pone.0211958 (PMC6386365; doi:10.1371/journal.pone.0211958)
Supplement: S1 Appendix — (XLSX) [file pone.0211958.s001.xlsx]

## Sheet: Sofala, part 1
	Input	Data		Reference
	Percent circumcised in base year (2009), by 5-year age group	EIMC	0.107385	Ministerio da Saude (MISAU), Instituto Nacional de Estatística (INE) e ICF International (ICFI) (2013). Moçambique Inquérito Demográfico e de Saúde 2011. Calverton, Maryland; 2013. (age >15 years)
		5-9	0.109178
		10-14	0.110971
		15-19	0.112764
		20-24	0.137061
		25-29	0.163851
		30-34	0.161359
		35-39	0.161359
		40-44	0.176934
		45-49	0.176934
		50-54	0.176934
		55-59	0.176934
	VMMC effectiveness		0.6	Auvert B, Taljaard D, Lagarde E, Sobngwi-Tambekou J, Sitta R, et al. (2005) Randomized, controlled intervention trial of male circumcision for reduction of HIV infection risk: The ANRS 1265 trial. PLoS Med 2(11): e298.
				Gray RH, Kigozi G, Serwadda D, Makumbi F, Watya S, Nalugoda N et al. Male circumcision for HIV prevention n men in Rakai, Uganda: a randomized trial. Lancet 2007; 369: 767-66.
				Bailey RC, Moses S, Parker CB, Agot K, Maclean I, Krieger JN, et al. Male circumcision for HIV prevention in young men in Kisumu, Kenya: a randomized controlled trial. Lancet 2007; 369: 643-56.
	Ratio of infections averted among females to males		0.415824	Spectrum, Goals Model
	HIV incidence		See Part 2	Authors’ Calculations
				Spectrum, AIDS Impact Module and Goals module
	Discount rate		0.03	Authors’ assumption.

## Sheet: Sofala, part 2
																Mortality rates
			Population by age and sex				Incidence			Prevalence			Total Births								Annual mortality on ART	0
		Total	Male	Female			Male	Female			Male			Male			Total	Male	Female		Non–AIDS mortality
	2000					2000				2000			2000	32598.6		2000					0–4	0.0419096
	0-4	253365	127699	125666		0-4	0.00900639	0.00890814		0-4	0.0210006		2001	33307		0-4	0.0507174	0.0553429	0.046017		5–9	0.00757741
	5-9	196236	98239.2	97996.5		5-9	0	0		5-9	0.00636884		2002	34095.2		5-9	0.00916329	0.00965938	0.00866596		10–14	0.00389999
	10-14	154549	77246.4	77302.4		10-14	0	0		10-14	0.00173312		2003	34837.8		10-14	0.00448039	0.00459699	0.00436152		15–19	0.00468382
	15-19	120632	57859.7	62772.1		15-19	0.0086405	0.0149913		15-19	0.0327603		2004	35613.4		15-19	0.00544558	0.00520682	0.00566566		20–24	0.00830714
	20-24	109840	48311.7	61528.4		20-24	0.0285078	0.0349048		20-24	0.0881056		2005	36510		20-24	0.00798898	0.00828071	0.00775993		25–29	0.0132357
	25-29	98195.9	44498.6	53697.3		25-29	0.036535	0.0358413		25-29	0.133959		2006	37420.5		25-29	0.0106679	0.0115077	0.00997185		30–34	0.0154483
	30-34	76553.9	35815.7	40738		30-34	0.0362849	0.0304436		30-34	0.159411		2007	38424.2		30-34	0.0127365	0.0136396	0.0119426		35–39	0.0211122
	35-39	63007.4	27990.1	35017.3		35-39	0.0312748	0.0244779		35-39	0.168051		2008	39316.9		35-39	0.0160934	0.0180035	0.0145666		40–44	0.0219866
	40-44	50022.3	23190.9	26831.4		40-44	0.0244775	0.0196327		40-44	0.146142		2009	40249		40-44	0.0175605	0.0205178	0.0150045		45–49	0.0221717
	45-49	39709.2	18952.5	20756.8		45-49	0.0179824	0.0156684		45-49	0.111313		2010	41237.4		45-49	0.0188209	0.0227725	0.0152039		50–54	0.0225549
	50-54	31315.8	15110.6	16205.2		50-54	0.0130796	0.0119697		50-54	0.0766786		2011	42260.7		50-54	0.0211622	0.0245678	0.0179754		55–59	0.0246977
	55-59	24409.9	11627.3	12782.7		55-59	0.0102518	0.00852157		55-59	0.0618176		2012	43319.4		55-59	0.0244908	0.0278432	0.0214552		60–64	0.0310525
	60-64	19257	9287.74	9969.48		60-64	0.00936135	0.00596461		60-64	0.045687		2013	43961.3		60-64	0.0322395	0.0364768	0.0283096		65–69	0.04295
	65-69	14586.9	7197.73	7389.15		65-69	0.00956389	0.00516036		65-69	0.0338127		2014	44740.2		65-69	0.045842	0.0503677	0.0414581		70–74	0.0651726
	70-74	9753.23	4971.05	4782.17		70-74	0.00927715	0.0061647		70-74	0.0324275		2015	45511.5		70-74	0.0704197	0.0762106	0.0644		75–79	0.101246
	75-79	5139.99	2793.32	2346.68		75-79	0.00619134	0.00151806		75-79	0.0277634		2016	46289.5		75-79	0.109183	0.117716	0.0990267		80–84	0.199417
	80+	4479.64	2496.4	1983.24		80+	0	0		80+	0.00740857		2017	47073.5		80+	0.216202	0.227781	0.201627
	Total	1.27105e+06	613288	657765		Total	0.0123229	0.0134106		Total	0.0558767		2018	47803.1		Total	0.0206945	0.0230839	0.0184666
	2001					2001				2001			2019	48444.4		2001
	0-4	259891	130993	128898		0-4	0.00975069	0.0096425		0-4	0.0238658		2020	49130.7		0-4	0.0498811	0.0544937	0.0451921
	5-9	203976	102141	101835		5-9	0	0		5-9	0.007856		2021	50794.5		5-9	0.00894886	0.0094643	0.00843189
	10-14	161483	80679.2	80803.7		10-14	0	0		10-14	0.00243305		2022	52501.3		10-14	0.00438903	0.00452047	0.00425777
	15-19	125922	61773.1	64149.2		15-19	0.010522	0.0185898		15-19	0.0351521		2023	54266.1		15-19	0.00541256	0.00514986	0.00566554
	20-24	109024	48050	60974.1		20-24	0.0347835	0.0433742		20-24	0.0947222		2024	56084.2		20-24	0.00815852	0.00826546	0.00807425
	25-29	101990	45383.3	56606.5		25-29	0.0445585	0.0445462		25-29	0.146269		2025	57948.7		25-29	0.0112859	0.0118865	0.0108075
	30-34	78813.4	37244.7	41568.8		30-34	0.0443087	0.0378789		30-34	0.174597		2026	59872.7		30-34	0.0134616	0.014299	0.0127069
	35-39	64763.8	28612.4	36151.4		35-39	0.0381295	0.0304171		35-39	0.18464		2027	61873		35-39	0.0172523	0.0191515	0.0157442
	40-44	51521.8	23656.6	27865		40-44	0.0298439	0.0244011		40-44	0.161105		2028	63944.1		40-44	0.0186467	0.0217383	0.0160222
	45-49	40762.9	19241.3	21521.6		45-49	0.0219175	0.0194771		45-49	0.123209		2029	66070		45-49	0.0198063	0.0239946	0.0160534
	50-54	32245.5	15544	16701.4		50-54	0.0159458	0.0148737		50-54	0.0847218		2030	68238.3		50-54	0.0219686	0.0254455	0.018733
	55-59	24964.4	11841.6	13122.8		55-59	0.0125099	0.0105837		55-59	0.0679581		2031	70445.1		55-59	0.0249706	0.0282885	0.0219767
	60-64	19605.8	9395.41	10210.2		h ju	0.0114404	0.00739745		60-64	0.0504426		2032	72688.6		60-64	0.0324334	0.0367148	0.0284943
	65-69	14816.9	7226.92	7590.17		65-69	0.0116751	0.00639608		65-69	0.037224		2033	74954.6		65-69	0.0456931	0.0502897	0.0412915
	70-74	10058.8	5076.37	4982.29		70-74	0.0112845	0.00765596		70-74	0.0355637		2034	77228.6		70-74	0.0699741	0.0758793	0.0639598
	75-79	5394.13	2838.63	2555.68		75-79	0.00764456	0.0018381		75-79	0.0305038		2035	79500.4		75-79	0.10824	0.116986	0.0985176
	80+	4276.08	2376.59	1899.49		80+	0	0		80+	0.00822424		2036	81796.2		80+	0.21437	0.226299	0.199447
	Total	1.30951e+06	632074	677436		Total	0.0150724	0.0165519		Total	0.0610769		2037	84142.3		Total	0.0206299	0.0229009	0.018511
	2002					2002				2002			2038	86538.8		2002
	0-4	266236	134209	132027		0-4	0.010245	0.0101311		0-4	0.026526		2039	88991.4		0-4	0.0492003	0.0536996	0.0446279
	5-9	211677	106019	105658		5-9	0	0		5-9	0.00952127		2040	91500.6		5-9	0.00876631	0.00927712	0.00825376
	10-14	168638	84240.2	84397.7		10-14	0	0		10-14	0.00328823		2041	94087.3		10-14	0.0043146	0.00444773	0.0041817
	15-19	132301	66229.9	66071.3		15-19	0.00796622	0.0142744		15-19	0.0368707		2042	96769.5		15-19	0.00538725	0.00511258	0.00566258
	20-24	108176	47753.2	60422.3		20-24	0.026417	0.0333526		20-24	0.0990826		2043	99559.8		20-24	0.00834484	0.00823711	0.00842998
	25-29	104944	46146.5	58798		25-29	0.033827	0.0342712		25-29	0.156643		2044	102473		25-29	0.0119889	0.0122752	0.0117642
	30-34	81607.5	38553.6	43053.9		30-34	0.0336519	0.0291508		30-34	0.187427		2045	105510		30-34	0.014249	0.0149842	0.0135906
	35-39	66388.9	29400.5	36988.3		35-39	0.0289345	0.0234072		35-39	0.199191		2046	108667		35-39	0.0185338	0.0203705	0.0170787
	40-44	52979	24063.3	28915.6		40-44	0.0226588	0.0187868		40-44	0.174443		2047	111933		40-44	0.0198514	0.0230356	0.0171953
	45-49	41848.8	19539.1	22309.7		45-49	0.0166447	0.0149945		45-49	0.13397		2048	115321		45-49	0.0208906	0.0252987	0.01703
	50-54	33129.4	15908.7	17220.7		50-54	0.0121006	0.0114624		50-54	0.0918686		2049	118844		50-54	0.0228544	0.0263776	0.0195996
	55-59	25570.7	12105.7	13465		55-59	0.00948842	0.00813825		55-59	0.0732463		2050	122501		55-59	0.025534	0.0287943	0.0226162
	60-64	19960.2	9505.07	10455.3		60-64	0.0086857	0.00570962		60-64	0.0547251					60-64	0.0326931	0.0369777	0.0287973
	65-69	15057.6	7269.33	7788.3		65-69	0.00885537	0.00494018		65-69	0.0401582					65-69	0.0456127	0.0502456	0.0412885
	70-74	10334.9	5159.57	5175.34		70-74	0.00860517	0.00588714		70-74	0.0381674					70-74	0.0696659	0.0756394	0.0637106
	75-79	5637.75	2894.1	2743.65		75-79	0.00579956	0.00146147		75-79	0.0328966					75-79	0.107517	0.116184	0.0983747
	80+	4149.74	2286.5	1863.24		80+	0	0		80+	0.0091917					80+	0.21203	0.224275	0.197004
	Total	1.34864e+06	651283	697353		Total	0.0116282	0.0127998		Total	0.065439					Total	0.0206362	0.0227442	0.0186675
	2003					2003				2003						2003
	0-4	272614	137440	135175		0-4	0.0105756	0.0104574		0-4	0.028782					0-4	0.0483556	0.0528384	0.043799
	5-9	219115	109764	109351		5-9	0	0		5-9	0.0113428					5-9	0.00856304	0.00909104	0.00803303
	10-14	175963	87903.2	88059.7		10-14	0	0		10-14	0.00429167					10-14	0.00423594	0.00438199	0.00409014
	15-19	138417	69233.7	69183.1		15-19	0.00718519	0.0130509		15-19	0.0370226					15-19	0.00533257	0.00504786	0.00561749
	20-24	110091	50035.6	60055.8		20-24	0.023964	0.0305732		20-24	0.099469					20-24	0.00851081	0.00815844	0.00880439
	25-29	105673	46216.1	59456.5		25-29	0.0306807	0.0314404		25-29	0.16406					25-29	0.0127211	0.0126803	0.0127559
	30-34	84954.4	39700.1	45254.3		30-34	0.0305236	0.0267396		30-34	0.196716					30-34	0.0150575	0.0156747	0.014516
	35-39	67819.4	30372.3	37447.1		35-39	0.0262616	0.0214904		35-39	0.21036					35-39	0.0198588	0.0216047	0.0184427
	40-44	54406.1	24395.8	30010.3		40-44	0.0205714	0.0172555		40-44	0.185075					40-44	0.0210865	0.0243638	0.0184224
	45-49	42966	19857.4	23108.6		45-49	0.0151011	0.0137606		45-49	0.142755					45-49	0.0220055	0.0266367	0.0180258
	50-54	33955.9	16192.4	17763.4		50-54	0.0109817	0.0105315		50-54	0.0975146					50-54	0.0237287	0.0273371	0.0204396
	55-59	26235.8	12424.2	13811.6		55-59	0.00862062	0.00747419		55-59	0.0770863					55-59	0.0260958	0.0292963	0.0232167
	60-64	20321.1	9613.11	10708		60-64	0.00789728	0.00523476		60-64	0.0581109					60-64	0.032942	0.0372787	0.0290488
	65-69	15312.5	7327.7	7984.79		65-69	0.00806269	0.00452012		65-69	0.0422762					65-69	0.0455164	0.0502165	0.0412032
	70-74	10576.2	5216.67	5359.51		70-74	0.00777749	0.00543307		70-74	0.0399252					70-74	0.0692764	0.0753675	0.0633477
	75-79	5869.41	2959.72	2909.69		75-79	0.00520099	0.00129196		75-79	0.0347236					75-79	0.106733	0.115385	0.0978694
	80+	4095.9	2223.42	1872.3		80+	0	0		80+	0.0103032					80+	0.20955	0.222322	0.194404
	Total	1.38839e+06	670875	717510		Total	0.0107613	0.0118498		Total	0.0685491					Total	0.0206113	0.0225858	0.0187651
	2004					2004				2004						2004
	0-4	279264	140806	138458		0-4	0.0107984	0.0106783		0-4	0.0305463					0-4	0.0474099	0.0518726	0.0428716
	5-9	226166	113311	112854		5-9	0	0		5-9	0.013347					5-9	0.00836502	0.00891045	0.00781738
	10-14	183415	91643.7	91771.5		10-14	0	0		10-14	0.00543058					10-14	0.00416167	0.00432182	0.00400175
	15-19	144779	72358.7	72420.9		15-19	0.00655065	0.0119754		15-19	0.0361207					15-19	0.00524346	0.00497765	0.00550901
	20-24	113057	52817.3	60239.6		20-24	0.0220215	0.0281621		20-24	0.0982532					20-24	0.00866276	0.00808226	0.00917172
	25-29	105565	46141.4	59423.9		25-29	0.0281844	0.0289839		25-29	0.168311					25-29	0.0133917	0.0130112	0.0136871
	30-34	88654.8	40684.4	47970.6		30-34	0.02803	0.0246289		30-34	0.202836					30-34	0.0158316	0.0163024	0.015436
	35-39	69110.6	31489.8	37620.8		35-39	0.0241591	0.0198231		35-39	0.218185					35-39	0.0211192	0.0227434	0.0197597
	40-44	55808	24679.4	31128.5		40-44	0.0189122	0.0159255		40-44	0.193081					40-44	0.0222588	0.0255968	0.0196124
	45-49	44098	20188	23910.1		45-49	0.0138763	0.0126992		45-49	0.149558					45-49	0.0230437	0.0278706	0.0189681
	50-54	34739	16408.8	18330		50-54	0.0100922	0.00972059		50-54	0.101723					50-54	0.0244826	0.0281917	0.0211527
	55-59	26951.8	12783.5	14168.5		55-59	0.00792141	0.00689261		55-59	0.0795726					55-59	0.0265795	0.0297208	0.0237449
	60-64	20695.4	9725.13	10970.3		60-64	0.00724113	0.00484263		60-64	0.0605535					60-64	0.0331257	0.037483	0.0292465
	65-69	15577.5	7398.03	8179.47		65-69	0.00739219	0.00418292		65-69	0.0437209					65-69	0.0453821	0.0501311	0.0410868
	70-74	10786.1	5253.29	5532.8		70-74	0.00715694	0.00501439		70-74	0.0408871					70-74	0.0688021	0.0750147	0.0629361
	75-79	6104.7	3038.57	3066.12		75-79	0.00477694	0.00121042		75-79	0.0358284					75-79	0.105885	0.114598	0.097251
	80+	4092.09	2178.82	1913.27		80+	0	0		80+	0.0114787					80+	0.207353	0.220632	0.192231
	Total	1.42886e+06	690905	737959		Total	0.0100745	0.0110373		Total	0.0705382					Total	0.0205515	0.0223938	0.0188267
	2005					2005				2005						2005
	0-4	286400	144426	141974		0-4	0.0109301	0.0108088		0-4	0.031671					0-4	0.0463933	0.0508348	0.0418752
	5-9	232843	116656	116187		5-9	0	0		5-9	0.015456					5-9	0.00817416	0.00873732	0.00760872
	10-14	190983	95450.3	95533.1		10-14	0	0		10-14	0.00669805					10-14	0.00409356	0.00426531	0.00392007
	15-19	151393	75614.8	75777.9		15-19	0.00597239	0.0109754		15-19	0.0340706					15-19	0.00513174	0.00490235	0.00535825
	20-24	117078	56104	60974.6		20-24	0.0202128	0.0258763		20-24	0.0950746					20-24	0.00876154	0.00800618	0.00945357
	25-29	104888	45955.1	58932.3		25-29	0.0258666	0.0266518		25-29	0.168605					25-29	0.013893	0.0131902	0.0144411
	30-34	92335.2	41525.1	50810.3		30-34	0.0256967	0.0226125		30-34	0.205182					30-34	0.0164275	0.016745	0.0161716
	35-39	70488.4	32683.3	37805.1		35-39	0.0221958	0.018236		35-39	0.22196					35-39	0.0221002	0.0235712	0.0208284
	40-44	57158.2	24985.1	32173		40-44	0.0173522	0.0146449		40-44	0.197954					40-44	0.0231537	0.026517	0.020542
	45-49	45235.3	20514.5	24720.8		45-49	0.0127493	0.0116807		45-49	0.154042					45-49	0.0237987	0.0287524	0.0196806
	50-54	35509	16584.4	18924.6		50-54	0.0092623	0.00893565		50-54	0.104334					50-54	0.0249063	0.0287457	0.0215513
	55-59	27695.7	13152.7	14543		55-59	0.00729153	0.00635949		55-59	0.0805665					55-59	0.0268146	0.0299338	0.024006
	60-64	21098.3	9856.55	11241.8		60-64	0.00665624	0.00445586		60-64	0.061921					60-64	0.0331289	0.0374982	0.0292818
	65-69	15853	7477.61	8375.42		65-69	0.00681573	0.00383774		65-69	0.0443799					65-69	0.0451193	0.049937	0.0408181
	70-74	10978.6	5279.75	5698.84		70-74	0.00657129	0.00458928		70-74	0.0409608					70-74	0.0681901	0.074467	0.0623748
	75-79	6334.72	3120.5	3214.22		75-79	0.00438889	0.00113713		75-79	0.0362347					75-79	0.104988	0.113738	0.0964922
	80+	4130.34	2152.18	1978.16		80+	0	0		80+	0.0125973					80+	0.205214	0.218816	0.190415
	Total	1.4704e+06	711538	758865		Total	0.00943876	0.0102834		Total	0.0711754					Total	0.0204087	0.0221279	0.0187968
	2006					2006				2006						2006
	0-4	294030	148308	145722		0-4	0.0120733	0.0119393		0-4	0.032538					0-4	0.0453361	0.0496557	0.0409399
	5-9	239201	119843	119358		5-9	0	0		5-9	0.0178152					5-9	0.00801071	0.00856848	0.00745066
	10-14	198612	99287.5	99324.5		10-14	0	0		10-14	0.00819936					10-14	0.00404129	0.00421548	0.00386534
	15-19	158246	78999.8	79246.7		15-19	0.00541822	0.00997953		15-19	0.031812					15-19	0.00500227	0.00482308	0.0051809
	20-24	122175	59908.2	62266.7		20-24	0.018391	0.0235355		20-24	0.0918449					20-24	0.00877736	0.00791533	0.00960965
	25-29	103933	45697.1	58235.7		25-29	0.0235375	0.0242543		25-29	0.167468					25-29	0.0141863	0.0131694	0.0149842
	30-34	95573.9	42257.9	53315.8		30-34	0.023379	0.020569		30-34	0.207115					30-34	0.0167528	0.0169265	0.0166152
	35-39	72240.2	33858.2	38381.9		35-39	0.0202558	0.016613		35-39	0.225146					35-39	0.0226859	0.0239792	0.021545
	40-44	58430.4	25405.4	33025		40-44	0.0157945	0.0133287		40-44	0.202776					40-44	0.0236672	0.0269773	0.0211153
	45-49	46368.5	20816.8	25551.9		45-49	0.0116081	0.0106356		45-49	0.158658					45-49	0.0241592	0.0291446	0.0200975
	50-54	36310.4	16757.6	19552.9		50-54	0.00843468	0.008138		50-54	0.10718					50-54	0.0249257	0.0288598	0.0215541
	55-59	28439.6	13495.3	14944.3		55-59	0.00662867	0.0057948		55-59	0.0815151					55-59	0.0267505	0.0298321	0.0239678
	60-64	21548.4	10027.1	11521.3		60-64	0.00607666	0.00404621		60-64	0.0631731					60-64	0.0329164	0.0372399	0.0291536
	65-69	16139.4	7563.35	8576.08		65-69	0.00618604	0.00351089		65-69	0.0451253					65-69	0.0447454	0.0495626	0.0404971
	70-74	11171.3	5309.48	5861.8		70-74	0.00602659	0.00420483		70-74	0.040917					70-74	0.0674845	0.0737428	0.0618158
	75-79	6552.06	3195	3357.06		75-79	0.00400683	0.000997924		75-79	0.0364955					75-79	0.10405	0.112788	0.0956803
	80+	4199.77	2142.57	2057.38		80+	0	0		80+	0.0138041					80+	0.203375	0.217005	0.189163
	Total	1.51317e+06	732872	780299		Total	0.00903231	0.00974469		Total	0.0716454					Total	0.0201679	0.0217471	0.0186849
	2007					2007				2007						2007	0	0	0
	0-4	302370	152547	149823		0-4	0.0120777	0.0119478		0-4	0.0326474					0-4	0.0435916	0.0478765	0.0392288
	5-9	245453	122980	122472		5-9	0	0		5-9	0.0202166					5-9	0.00779929	0.00837498	0.00722122
	10-14	206215	103105	103110		10-14	0	0		10-14	0.00990477					10-14	0.00397051	0.00415785	0.00378143
	15-19	165331	82512.7	82818.5		15-19	0.00505997	0.0092879		15-19	0.0294616					15-19	0.00484601	0.00474076	0.00495089
	20-24	128363	64239.6	64123		20-24	0.0171262	0.0218522		20-24	0.087981					20-24	0.00862114	0.00778514	0.00945866
	25-29	103022	45434.6	57588		25-29	0.0219396	0.0225371		25-29	0.163788					25-29	0.0139545	0.0127707	0.0148884
	30-34	98100.9	42912.5	55188.2		30-34	0.0217873	0.0191043		30-34	0.207539					30-34	0.0163822	0.0165204	0.0162748
	35-39	74565.8	34965.6	39600.4		35-39	0.0189021	0.0154374		35-39	0.226687					35-39	0.0222943	0.0234531	0.0212711
	40-44	59659.7	26012.3	33647.4		40-44	0.0147206	0.0123827		40-44	0.206692					40-44	0.0232129	0.0263967	0.0207516
	45-49	47519.2	21100.7	26418.5		45-49	0.0108216	0.00989519		45-49	0.163094					45-49	0.0235437	0.0284004	0.0196646
	50-54	37188.6	16963.1	20225.7		50-54	0.00785814	0.00756235		50-54	0.110336					50-54	0.0240544	0.0280506	0.0207026
	55-59	29178.5	13792.2	15386.3		55-59	0.00618312	0.00538477		55-59	0.0825148					55-59	0.0259738	0.0290979	0.0231733
	60-64	22063.8	10250.1	11813.7		60-64	0.00566125	0.00375677		60-64	0.0642791					60-64	0.032164	0.0364299	0.0284627
	65-69	16442.5	7655.43	8787.08		65-69	0.00578779	0.0032568		65-69	0.0459804					65-69	0.0439758	0.0488244	0.0397516
	70-74	11379.2	5352.08	6027.11		70-74	0.00557755	0.00389971		70-74	0.0407121					70-74	0.0664267	0.0727156	0.060812
	75-79	6754.72	3256.82	3497.9		75-79	0.00372305	0.000926348		75-79	0.0366017					75-79	0.102753	0.111593	0.0944706
	80+	4293.3	2148.37	2144.93		80+	0	0		80+	0.0150778					80+	0.201436	0.215069	0.18778
	Total	1.5579e+06	755228	802673		Total	0.00859746	0.00921138		Total	0.0715714					Total	0.0195342	0.0210367	0.0181203
	2008					2008				2008						2008
	0-4	311192	157031	154162		0-4	0.0127053	0.0125696		0-4	0.0313249					0-4	0.0419096	0.0461608	0.0375804
	5-9	251803	126166	125637		5-9	0	0		5-9	0.0215888					5-9	0.00757741	0.00817068	0.00698164
	10-14	213570	106797	106773		10-14	0	0		10-14	0.01129					10-14	0.00389999	0.00410068	0.00369925
	15-19	172566	86113.4	86452.4		15-19	0.00466078	0.00854306		15-19	0.0261412					15-19	0.00468382	0.0046541	0.00471343
	20-24	134306	67161.3	67144.4		20-24	0.0156663	0.020012		20-24	0.0787489					20-24	0.00830714	0.00757332	0.00904114
	25-29	104782	47637.6	57144.8		25-29	0.0201003	0.0206673		25-29	0.150597					25-29	0.0132357	0.0120242	0.0142457
	30-34	98668.8	42962.4	55706.5		30-34	0.0199569	0.0175125		30-34	0.198206					30-34	0.0154483	0.0156448	0.0152969
	35-39	77521.9	35985.6	41536.5		35-39	0.0173213	0.0141518		35-39	0.217582					35-39	0.0211122	0.0221838	0.0201836
	40-44	60835.6	26841.2	33994.4		40-44	0.0134963	0.0113564		40-44	0.201342					40-44	0.0219866	0.0249602	0.0196387
	45-49	48734.6	21369.5	27365.1		45-49	0.0099284	0.00907954		45-49	0.16086					45-49	0.0221717	0.0267707	0.0185803
	50-54	38174.2	17228.8	20945.4		50-54	0.00721437	0.00693212		50-54	0.109714					50-54	0.0225549	0.0265132	0.019299
	55-59	29922.8	14043.8	15879		55-59	0.0056585	0.00494382		55-59	0.0806024					55-59	0.0246977	0.0278667	0.021895
	60-64	22660.9	10534.5	12126.4		60-64	0.00519396	0.00345476		60-64	0.0628639					60-64	0.0310525	0.0352399	0.0274149
	65-69	16767.7	7754.22	9013.48		65-69	0.0052948	0.00299803		65-69	0.0452632					65-69	0.04295	0.0478049	0.0387531
	70-74	11606.5	5410.63	6196.05		70-74	0.00512637	0.00356365		70-74	0.0389989					70-74	0.0651726	0.0714932	0.0596805
	75-79	6941.24	3305.03	3636.21		75-79	0.00341285	0.000848035		75-79	0.0351654					75-79	0.101246	0.11024	0.0930708
	80+	4411.3	2169.76	2241.54		80+	0	0		80+	0.0158854					80+	0.199417	0.213033	0.186317
	Total	1.60446e+06	778511	825953		Total	0.00823908	0.0087725		Total	0.068267					Total	0.01872	0.0201861	0.0173378
	2009					2009				2009						2009
	0-4	320492	161758	158733		0-4	0.0116673	0.0115423		0-4	0.0326013					0-4	0.0402388	0.0444363	0.0359614
	5-9	258488	129523	128965		5-9	0	0		5-9	0.0248618					5-9	0.00734566	0.00795053	0.00673818
	10-14	220552	110299	110252		10-14	0	0		10-14	0.0139622					10-14	0.00383078	0.00404277	0.00361868
	15-19	179911	89780.1	90130.6		15-19	0.00432913	0.00788647		15-19	0.0256599					15-19	0.00453291	0.00457709	0.00449091
	20-24	140502	70187.1	70314.4		20-24	0.0144497	0.0183932		20-24	0.0764215					20-24	0.00796532	0.0073553	0.00857424
	25-29	107552	50307.3	57244.9		25-29	0.0185846	0.0190243		25-29	0.150214					25-29	0.0129218	0.0115518	0.0141258
	30-34	98560.6	42910.3	55650.1		30-34	0.0184564	0.0161201		30-34	0.205932					30-34	0.0149871	0.0151906	0.0148335
	35-39	80895.3	36900.3	43995		35-39	0.0160071	0.013012		35-39	0.227533					35-39	0.020662	0.021629	0.0198551
	40-44	61988.8	27849.1	34139.7		40-44	0.012498	0.0104566		40-44	0.213826					40-44	0.0215424	0.0243498	0.0192524
	45-49	50007.1	21635.1	28372		45-49	0.00918544	0.00836165		45-49	0.173201					45-49	0.0216329	0.026107	0.0182212
	50-54	39243.7	17544.2	21699.6		50-54	0.00666559	0.0063906		50-54	0.119829					50-54	0.0218155	0.0257989	0.0185948
	55-59	30680.5	14260.4	16420.2		55-59	0.00524883	0.00454996		55-59	0.0865769					55-59	0.0239814	0.0272146	0.0211843
	60-64	23330.5	10867.1	12463.3		60-64	0.0047943	0.00318256		60-64	0.0671995					60-64	0.0303788	0.0344948	0.02679
	65-69	17119.7	7864.07	9255.65		65-69	0.00488674	0.00275876		65-69	0.0489718					65-69	0.0422256	0.0471141	0.0380525
	70-74	11849.4	5481.32	6368.08		70-74	0.00476452	0.00329848		70-74	0.040927					70-74	0.0641885	0.070505	0.0587515
	75-79	7114.17	3343.46	3770.89		75-79	0.00319023	0.000769516		75-79	0.0370071					75-79	0.0999312	0.109027	0.0918618
	80+	4553.42	2204.56	2348.85		80+	0	0		80+	0.0181312					80+	0.197611	0.211149	0.184905
	Total	1.65284e+06	802715	850124		Total	0.00763129	0.00809075		Total	0.07105					Total	0.0181053	0.0195178	0.0167715
	2010					2010				2010						2010
	0-4	330089	166647	163442		0-4	0.0121771	0.0120433		0-4	0.0326802					0-4	0.038807	0.042887	0.034647
	5-9	265699	133161	132538		5-9	0	0		5-9	0.026883					5-9	0.00712313	0.00771972	0.00652372
	10-14	227177	113611	113566		10-14	0	0		10-14	0.0162658					10-14	0.00376454	0.00397759	0.0035514
	15-19	187354	93504.7	93849		15-19	0.0046606	0.00753349		15-19	0.0245572					15-19	0.00441475	0.00451108	0.00431877
	20-24	146936	73326.7	73609.6		20-24	0.0154708	0.0175034		20-24	0.0702271					20-24	0.00765104	0.00713184	0.00816824
	25-29	111274	53428.3	57845.4		25-29	0.0199334	0.0181191		25-29	0.141598					25-29	0.0131136	0.0113825	0.0147124
	30-34	97926.9	42749.9	55177		30-34	0.0197961	0.0153567		30-34	0.201942					30-34	0.0151785	0.0153197	0.0150691
	35-39	84254	37681	46572.8		35-39	0.0171271	0.0123706		35-39	0.225107					35-39	0.0210948	0.0219602	0.0203947
	40-44	63243.7	28935.2	34308.5		40-44	0.0134261	0.00996808		40-44	0.214462					40-44	0.0220322	0.0247826	0.0197125
	45-49	51250.9	21925.6	29325.3		45-49	0.00984732	0.00795569		45-49	0.175946					45-49	0.0221194	0.0267035	0.0186921
	50-54	40347	17872.5	22474.5		50-54	0.00714134	0.00608398		50-54	0.123887					50-54	0.0219872	0.0261669	0.0186634
	55-59	31456.6	14454.7	17001.9		55-59	0.0056113	0.00432966		55-59	0.0883375					55-59	0.0239198	0.0272375	0.0210885
	60-64	24040.7	11215.9	12824.8		60-64	0.00514468	0.003034		60-64	0.0678547					60-64	0.0301977	0.0342949	0.0266145
	65-69	17505.3	7994.76	9510.51		65-69	0.00523785	0.00263306		65-69	0.0501622					65-69	0.0418237	0.0467521	0.0376808
	70-74	12105.2	5561.26	6544.09		70-74	0.00508531	0.00311662		70-74	0.0408361					70-74	0.0634162	0.0697523	0.0580577
	75-79	7280.57	3377.72	3902.85		75-79	0.00342755	0.000757714		75-79	0.0367044					75-79	0.0987427	0.107814	0.0908922
	80+	4711.48	2247.71	2463.78		80+	0	0		80+	0.0192693					80+	0.195983	0.209435	0.183711
	Total	1.70265e+06	827694	874956		Total	0.00815542	0.00794559		Total	0.0702076					Total	0.0177761	0.0190985	0.0165253
	2011					2011				2011						2011
	0-4	340003	171690	168312		0-4	0.0106833	0.010567		0-4	0.0319022					0-4	0.0373305	0.0413896	0.033191
	5-9	273476	137087	136389		5-9	0	0		5-9	0.0284641					5-9	0.00690531	0.00751316	0.00629436
	10-14	233501	116774	116727		10-14	0	0		10-14	0.0185775					10-14	0.00370372	0.00392573	0.00348162
	15-19	194844	97253.5	97590.8		15-19	0.00423896	0.00702729		15-19	0.0239829					15-19	0.00431945	0.00446953	0.00416989
	20-24	153602	76578.1	77023.6		20-24	0.0139802	0.0162685		20-24	0.0641572					20-24	0.00729543	0.00692372	0.00766499
	25-29	115986	57019.4	58966.7		25-29	0.0180131	0.0168372		25-29	0.132474					25-29	0.012959	0.0110154	0.0148384
	30-34	97027.6	42516.8	54511		30-34	0.0178907	0.0142795		30-34	0.195553					30-34	0.01494	0.0149944	0.0148974
	35-39	87240	38369.8	48870.2		35-39	0.0154799	0.0114965		35-39	0.221114					35-39	0.0208153	0.0215613	0.020226
	40-44	64865.7	30020.1	34845.4		40-44	0.0121914	0.00927336		40-44	0.213124					40-44	0.0218054	0.024364	0.0196012
	45-49	52444.9	22324.8	30120.2		45-49	0.0089003	0.00739545		45-49	0.177377					45-49	0.0218992	0.0263722	0.0185839
	50-54	41468.9	18190.6	23278.3		50-54	0.00646377	0.00566286		50-54	0.127233					50-54	0.0216547	0.0259185	0.0183227
	55-59	32286.1	14658.1	17628		55-59	0.00508291	0.00402965		55-59	0.0900398					55-59	0.0234625	0.0268843	0.0206172
	60-64	24766.6	11547.9	13218.7		60-64	0.0046556	0.00282475		60-64	0.0681336					60-64	0.0297297	0.033811	0.0261642
	65-69	17938.9	8161.71	9777.16		65-69	0.00476779	0.00244811		65-69	0.0511018					65-69	0.0412372	0.0461955	0.0370981
	70-74	12373.8	5646.82	6726.98		70-74	0.00460131	0.00292158		70-74	0.0407308					70-74	0.0625522	0.0689201	0.0572068
	75-79	7450.96	3415.42	4035.54		75-79	0.00310863	0.000681191		75-79	0.0361294					75-79	0.0974577	0.106624	0.0897004
	80+	4876.61	2293.02	2583.59		80+	0	0		80+	0.0201422					80+	0.194514	0.208063	0.182488
	Total	1.75415e+06	853547	900605		Total	0.00735652	0.00730533		Total	0.0688205					Total	0.0172845	0.0185529	0.0160824
	2012					2012				2012						2012
	0-4	350090	176820	173271		0-4	0.00760748	0.00752486		0-4	0.028555					0-4	0.0354818	0.0395165	0.0313646
	5-9	282020	141402	140619		5-9	0	0		5-9	0.0294685					5-9	0.00666782	0.00728647	0.00604572
	10-14	239727	119892	119835		10-14	0	0		10-14	0.0209468					10-14	0.00363475	0.00386597	0.00340342
	15-19	202298	100978	101320		15-19	0.00397288	0.00663583		15-19	0.0239879					15-19	0.00424004	0.0044411	0.00404145
	20-24	160480	79940.7	80539.6		20-24	0.0130503	0.0153176		20-24	0.0588655					20-24	0.00691721	0.00671864	0.00711431
	25-29	121720	61091.2	60628.8		25-29	0.016804	0.0158487		25-29	0.123753					25-29	0.0126151	0.010658	0.0145871
	30-34	96119.9	42261	53858.8		30-34	0.016689	0.0134429		30-34	0.187539					30-34	0.0145681	0.0145962	0.0145461
	35-39	89576	38975.4	50600.6		35-39	0.0144316	0.0108149		35-39	0.216449					35-39	0.0203292	0.0211658	0.0196848
	40-44	66995.4	31038.5	35956.8		40-44	0.011399	0.00872808		40-44	0.210598					40-44	0.0214099	0.0239326	0.0192323
	45-49	53592.4	22883.5	30708.9		45-49	0.00830078	0.00695867		45-49	0.178178					45-49	0.0215285	0.0260135	0.0181863
	50-54	42597.3	18485.9	24111.5		50-54	0.00603582	0.00532422		50-54	0.130056					50-54	0.0212129	0.025632	0.0178173
	55-59	33191.2	14892	18299.2		55-59	0.00474559	0.00379352		55-59	0.092041					55-59	0.0229156	0.026523	0.0199798
	60-64	25494.2	11842.3	13651.9		60-64	0.00434436	0.00264497		60-64	0.0684549					60-64	0.0291798	0.0333226	0.0255862
	65-69	18429.6	8372.88	10056.7		65-69	0.00442671	0.00229053		65-69	0.0518437					65-69	0.0406114	0.0455933	0.0364636
	70-74	12656.9	5737.27	6919.67		70-74	0.00431661	0.00272223		70-74	0.0408323					70-74	0.0616685	0.0681179	0.0562949
	75-79	7632.77	3461.83	4170.94		75-79	0.0028776	0.000667016		75-79	0.0355514					75-79	0.0961575	0.105404	0.0884833
	80+	5044.1	2337.43	2706.67		80+	0	0		80+	0.0207359					80+	0.193086	0.206747	0.181289
	Total	1.80767e+06	880411	927255		Total	0.00643384	0.00644888		Total	0.066806					Total	0.0166688	0.0179259	0.0154752
	2013					2013				2013						2013
	0-4	360063	181902	178162		0-4	0.00495315	0.00490041		0-4	0.0241834					0-4	0.0335435	0.0374468	0.0295583
	5-9	291029	145956	145073		5-9	0	0		5-9	0.0299709					5-9	0.00643215	0.00704046	0.00581887
	10-14	246058	123064	122994		10-14	0	0		10-14	0.0230593					10-14	0.00357807	0.00381052	0.00334696
	15-19	209505	104579	104926		15-19	0.00361727	0.00605964		15-19	0.0243045					15-19	0.00414611	0.00439392	0.00389912
	20-24	167526	83392.6	84133.1		20-24	0.0118403	0.0139555		20-24	0.0540463					20-24	0.00646508	0.0064927	0.00643771
	25-29	127321	63854.8	63466		25-29	0.0152182	0.0144317		25-29	0.114112					25-29	0.011438	0.00998098	0.0129068
	30-34	97706.7	44322.6	53384.3		30-34	0.0151187	0.0122486		30-34	0.17679					30-34	0.0133297	0.0135983	0.01311
	35-39	90160.5	39025.1	51135.5		35-39	0.0130761	0.00984518		35-39	0.210798					35-39	0.0184623	0.0198476	0.0174016
	40-44	69705.9	31974	37731.7		40-44	0.0103201	0.00794251		40-44	0.206905					40-44	0.0196464	0.022433	0.0172851
	45-49	54689.4	23632.3	31057.1		45-49	0.00752777	0.00633994		45-49	0.178546					45-49	0.019867	0.0245066	0.0163365
	50-54	43766.1	18752	25014.1		50-54	0.00546233	0.00485723		50-54	0.132233					50-54	0.0198264	0.0245046	0.0163266
	55-59	34184	15170.4	19013.6		55-59	0.00429358	0.00345016		55-59	0.0943784					55-59	0.0216826	0.0255941	0.0185618
	60-64	26225.5	12094.5	14131		60-64	0.00393175	0.00242027		60-64	0.0689512					60-64	0.0280759	0.0323731	0.0243981
	65-69	18987.9	8633.73	10354.1		65-69	0.00402428	0.0020847		65-69	0.0524622					65-69	0.03957	0.0446147	0.035381
	70-74	12957.8	5832.43	7125.41		70-74	0.00388152	0.00248754		70-74	0.0411819					70-74	0.0604323	0.0669443	0.0551019
	75-79	7828.72	3518.75	4309.98		75-79	0.00256269	0.000593263		75-79	0.0350193					75-79	0.094538	0.103802	0.0869748
	80+	5215.04	2381.66	2833.38		80+	0	0		80+	0.0212209					80+	0.191345	0.204962	0.179899
	Total	1.86293e+06	908085	954843		Total	0.00548839	0.00553684		Total	0.0643731					Total	0.0157165	0.017056	0.0144428
	2014					2014				2014						2014
	0-4	369961	186934	183027		0-4	0.00285067	0.0028207		0-4	0.0205087					0-4	0.0322919	0.0361381	0.0283636
	5-9	300503	150760	149743		5-9	0	0		5-9	0.0300248					5-9	0.00620401	0.00682213	0.0055817
	10-14	252712	126401	126311		10-14	0	0		10-14	0.0247881					10-14	0.00352187	0.00376153	0.00328203
	15-19	216353	107998	108355		15-19	0.00292806	0.00491174		15-19	0.0247715					15-19	0.00396795	0.00425146	0.00368706
	20-24	174719	86915.5	87803.5		20-24	0.00956263	0.0112842		20-24	0.0493618					20-24	0.00588041	0.00621077	0.00555339
	25-29	133433	66782.6	66649.9		25-29	0.0122649	0.0116641		25-29	0.105096					25-29	0.00900269	0.00843055	0.009576
	30-34	100399	46901.1	53497.9		30-34	0.012188	0.00990355		30-34	0.166497					30-34	0.0104861	0.0107946	0.0102157
	35-39	90411.1	39096.1	51315.1		35-39	0.0105424	0.00795607		35-39	0.20711					35-39	0.0139462	0.015189	0.0129993
	40-44	73034.3	32925.6	40108.7		40-44	0.00831721	0.00641782		40-44	0.205997					40-44	0.0150579	0.0171821	0.0133141
	45-49	55916.9	24619.8	31297.1		45-49	0.00607747	0.00513016		45-49	0.182423					45-49	0.0156251	0.0190398	0.0129331
	50-54	45064.3	19052.9	26011.4		50-54	0.00441269	0.00392328		50-54	0.137173					50-54	0.0165803	0.0203691	0.0138051
	55-59	35292.2	15509.5	19782.5		55-59	0.00347442	0.00279063		55-59	0.0990751					55-59	0.0192298	0.0228022	0.0164292
	60-64	26996.2	12327.9	14668.3		60-64	0.00317409	0.0019472		60-64	0.071374					60-64	0.0260188	0.0300838	0.0226146
	65-69	19621	8941.15	10680		65-69	0.00323289	0.00168186		65-69	0.0541455					65-69	0.0378681	0.0426347	0.033877
	70-74	13287.4	5939.38	7348		70-74	0.0031661	0.00201211		70-74	0.0425079					70-74	0.0587425	0.0651285	0.0535807
	75-79	8039.53	3585.45	4454.08		75-79	0.00208874	0.000464215		75-79	0.0353764					75-79	0.092555	0.101668	0.0852189
	80+	5393.04	2428.25	2964.8		80+	0	0		80+	0.0222299					80+	0.189365	0.202896	0.178283
	Total	1.92114e+06	937119	984017		Total	0.00424126	0.00429137		Total	0.0625372					Total	0.0143106	0.0156796	0.0130069
	2015					2015				2015						2015
	0-4	379787	191940	187847		0-4	0.0020068	0.00198628		0-4	0.0207807					0-4	0.0307877	0.0345241	0.0269709
	5-9	310215	155688	154528		5-9	0	0		5-9	0.0308719					5-9	0.00600102	0.00659807	0.00540066
	10-14	259887	130017	129870		10-14	0	0		10-14	0.02585					10-14	0.00346509	0.00370433	0.00322559
	15-19	222851	111230	111622		15-19	0.00234976	0.00394806		15-19	0.0254325					15-19	0.00389129	0.00420942	0.00357428
	20-24	182007	90495.7	91511.3		20-24	0.00766076	0.00905181		20-24	0.0455193					20-24	0.00548659	0.00599109	0.0049857
	25-29	139928	69843.3	70084.7		25-29	0.00980418	0.0093544		25-29	0.0963293					25-29	0.00796817	0.00783272	0.00810058
	30-34	104152	49967.4	54184.7		30-34	0.00974408	0.00794012		30-34	0.156251					30-34	0.00947823	0.00986008	0.0091261
	35-39	90346.7	39133.6	51213.1		35-39	0.00843406	0.0063885		35-39	0.202511					35-39	0.0124514	0.0138867	0.0113546
	40-44	76583.7	33847.2	42736.5		40-44	0.00663469	0.00513508		40-44	0.205064					40-44	0.0136168	0.0157932	0.0118931
	45-49	57377	25751.5	31625.6		45-49	0.00486865	0.00411714		45-49	0.185691					45-49	0.0144882	0.0177596	0.0118301
	50-54	46436	19424.3	27011.6		50-54	0.00353581	0.00315349		50-54	0.142527					50-54	0.0156924	0.0194291	0.0130053
	55-59	36478.1	15882.8	20595.1		55-59	0.00276881	0.00224197		55-59	0.104273					55-59	0.0184953	0.0221294	0.0157017
	60-64	27813.5	12554.3	15259.2		60-64	0.002535	0.001568		60-64	0.0743211					60-64	0.0252998	0.0294113	0.0219171
	65-69	20305.1	9269.61	11035.7		65-69	0.00260581	0.00136238		65-69	0.0559323					65-69	0.0371726	0.0419062	0.0331959
	70-74	13650.6	6065.9	7584.56		70-74	0.00252485	0.00162653		70-74	0.0440801					70-74	0.0578432	0.0641884	0.0527699
	75-79	8262.49	3659.41	4603.26		75-79	0.00171523	0.00039741		75-79	0.0359024					75-79	0.0913738	0.100456	0.0841504
	80+	5578.12	2477.73	3100.38		80+	0	0		80+	0.0231738					80+	0.187924	0.201405	0.17721
	Total	1.98166e+06	967247	1.01441e+06		Total	0.00337802	0.00342014		Total	0.0616381					Total	0.0135628	0.0149528	0.0122373
	2016					2016				2016						2016
	0-4	388995	196646	192350		0-4	0.00185518	0.00183509		0-4	0.0201797					0-4	0.0293502	0.0329873	0.0256318
	5-9	320524	160915	159609		5-9	0	0		5-9	0.0311246					5-9	0.0056802	0.00626882	0.00508677
	10-14	267648	133932	133716		10-14	0	0		10-14	0.0266624					10-14	0.00337206	0.00360957	0.00313417
	15-19	229063	114321	114741		15-19	0.00180104	0.00300813		15-19	0.026181					15-19	0.00377549	0.00411619	0.00343603
	20-24	189325	94101.3	95224.2		20-24	0.00586644	0.00689303		20-24	0.0424956					20-24	0.00517397	0.00578658	0.00456858
	25-29	146706	73020.3	73685.4		25-29	0.0074927	0.0071178		25-29	0.0882951					25-29	0.00705022	0.00719651	0.00690524
	30-34	108964	53519.3	55444.5		30-34	0.00745046	0.00604275		30-34	0.146978					30-34	0.00852235	0.00886361	0.00819621
	35-39	90092.7	39138.2	50954.6		35-39	0.00644402	0.00486136		35-39	0.197966					35-39	0.010897	0.0121761	0.00991452
	40-44	79948.7	34740.1	45208.6		40-44	0.00507095	0.00390975		40-44	0.205405					40-44	0.0120778	0.0139732	0.0106213
	45-49	59261.5	26932.8	32328.7		45-49	0.00374274	0.00313779		45-49	0.189527					45-49	0.0131863	0.0160182	0.0108271
	50-54	47831.5	19927.9	27903.6		50-54	0.00269623	0.00240067		50-54	0.149209					50-54	0.014757	0.0182013	0.0122972
	55-59	37712.9	16264.1	21448.7		55-59	0.00211817	0.00171012		55-59	0.110413					55-59	0.0177071	0.0212315	0.0150346
	60-64	28699	12797.2	15901.6		60-64	0.00193713	0.00118629		60-64	0.0782542					60-64	0.0244939	0.0285415	0.0212482
	65-69	21016.6	9590.63	11426.1		65-69	0.001984	0.00102523		65-69	0.0582146					65-69	0.0363627	0.0410138	0.0324582
	70-74	14058.5	6224.33	7834.16		70-74	0.00191171	0.00122415		70-74	0.0460307					70-74	0.0567969	0.0630206	0.0518522
	75-79	8497.96	3738.62	4759.15		75-79	0.00127733	0.000277783		75-79	0.0368426					75-79	0.0900151	0.0989576	0.0829556
	80+	5772.43	2532.11	3240.32		80+	0	0		80+	0.024295					80+	0.186277	0.199513	0.175934
	Total	2.04412e+06	998341	1.04578e+06		Total	0.00268039	0.00269112		Total	0.0607571					Total	0.0127957	0.0141447	0.0115079
	2017					2017				2017						2017
	0-4	397314	200892	196422		0-4	0.00157762	0.00156086		0-4	0.019869					0-4	0.0282625	0.0318966	0.0245458
	5-9	331296	166380	164917		5-9	0	0		5-9	0.0308033					5-9	0.00539374	0.00597469	0.00480764
	10-14	276201	138248	137953		10-14	0	0		10-14	0.0269995					10-14	0.0032683	0.00351262	0.00302345
	15-19	235192	117378	117814		15-19	0.00154418	0.00256994		15-19	0.0269716					15-19	0.00364549	0.00399818	0.0032941
	20-24	196593	97685.8	98906.8		20-24	0.00503464	0.00588766		20-24	0.0402356					20-24	0.0049071	0.00559651	0.00422621
	25-29	153685	76309.8	77375.3		25-29	0.00642348	0.00607374		25-29	0.0810429					25-29	0.00629837	0.00661075	0.00599027
	30-34	114873	57571.5	57301.1		30-34	0.00638531	0.00516053		30-34	0.138745					30-34	0.00766109	0.00791859	0.00740237
	35-39	89854.7	39155.4	50699.4		35-39	0.00552632	0.00415099		35-39	0.193259					35-39	0.00946531	0.0103745	0.00875954
	40-44	82844.4	35614.3	47230.1		40-44	0.00434138	0.00333579		40-44	0.206968					40-44	0.010671	0.0121084	0.00958719
	45-49	61709.1	28111.9	33597.2		45-49	0.00321334	0.0026728		45-49	0.193998					45-49	0.0119319	0.0142244	0.0100137
	50-54	49248.7	20615.4	28633.2		50-54	0.00232235	0.00204489		50-54	0.157382					50-54	0.0139055	0.0169524	0.0117117
	55-59	38984.5	16644.6	22339.8		55-59	0.00181213	0.0014565		55-59	0.117349					55-59	0.0169808	0.0203433	0.0144836
	60-64	29669.3	13075.8	16593.7		60-64	0.00166534	0.00102037		60-64	0.0832079					60-64	0.0237601	0.0277115	0.020646
	65-69	21742.4	9886.28	11856.3		65-69	0.00171356	0.00088867		65-69	0.0611044					65-69	0.0356241	0.0402274	0.0317851
	70-74	14517.8	6420.82	8097		70-74	0.00163871	0.00103881		70-74	0.048332					70-74	0.0558365	0.0619671	0.0509749
	75-79	8746.47	3822.73	4923.93		75-79	0.00109275	0.000271936		75-79	0.0382939					75-79	0.0887424	0.0976813	0.0817994
	80+	5976.54	2591.39	3385.15		80+	0	0		80+	0.0255731					80+	0.184768	0.197957	0.174672
	Total	2.10845e+06	1.0304e+06	1.07804e+06		Total	0.00232151	0.00231553		Total	0.0600952					Total	0.0121308	0.0134257	0.010893
	2018	0	0	0		2018				2018	0					2018
	0-4	405441	205041	200400		0-4	0.001422	0.0014065		0-4	0.01929					0-4	0.0271796	0.0307693	0.0235067
	5-9	342047	171838	170209		5-9	0	0		5-9	0.0297756					5-9	0.00511504	0.00569628	0.00452823
	10-14	285241	142814	142427		10-14	0	0		10-14	0.0270508					10-14	0.003159	0.00340539	0.00291066
	15-19	241431	120491	120940		15-19	0.00133625	0.00221236		15-19	0.0274373					15-19	0.00363387	0.00406488	0.00320446
	20-24	203602	101151	102450		20-24	0.00435758	0.00506909		20-24	0.0386696					20-24	0.00470969	0.0054442	0.0039845
	25-29	160744	79667.9	81076.4		25-29	0.00555048	0.0052213		25-29	0.0740908					25-29	0.00590786	0.0063594	0.00546418
	30-34	120696	60391.1	60305		30-34	0.00551793	0.00444009		30-34	0.129444					30-34	0.0072599	0.00756689	0.00695248
	35-39	91888.2	41349.1	50539.3		35-39	0.00477501	0.00357404		35-39	0.185362					35-39	0.00901518	0.00994687	0.00825287
	40-44	84087.6	35973.4	48114.1		40-44	0.00375598	0.00286576		40-44	0.206999					40-44	0.0102525	0.0117709	0.00911718
	45-49	64722.3	29234.5	35487.8		45-49	0.00278341	0.00230034		45-49	0.196795					45-49	0.011564	0.0139014	0.00963852
	50-54	50627.9	21495.3	29132.6		50-54	0.00199501	0.00175991		50-54	0.164951					50-54	0.0136627	0.0167055	0.0114176
	55-59	40299.4	17007.7	23291.7		55-59	0.0015694	0.00125753		55-59	0.123728					55-59	0.0166606	0.0201008	0.0141407
	60-64	30719.1	13395.8	17323.1		60-64	0.00143295	0.000872597		60-64	0.0882906					60-64	0.0233553	0.0274015	0.0202162
	65-69	22475.2	10148.4	12326.9		65-69	0.00147636	0.000749587		65-69	0.0640299					65-69	0.0351077	0.0398135	0.0312335
	70-74	15032.1	6656.83	8375.24		70-74	0.00141196	0.000919973		70-74	0.050432					70-74	0.0550839	0.0612134	0.0502121
	75-79	9008.22	3909.92	5098.3		75-79	0.000984391	0.000211477		75-79	0.039815					75-79	0.0876529	0.0967084	0.0807438
	80+	6190.25	2656.1	3534.34		80+	0	0		80+	0.0266834					80+	0.183367	0.196479	0.173505
	Total	2.17425e+06	1.06322e+06	1.11103e+06		Total	0.00203961	0.00201958		Total	0.059048					Total	0.0116793	0.0129786	0.0104358
	2019	0	0	0		2019				2019	0					2019
	0-4	413178	209002	204177		0-4	0.00118283	0.00117165		0-4	0.0174392					0-4	0.0259573	0.0294447	0.0223866
	5-9	352675	177233	175442		5-9	0	0		5-9	0.0289936					5-9	0.00484371	0.00540426	0.00427744
	10-14	294814	147663	147151		10-14	0	0		10-14	0.0275102					10-14	0.00304536	0.00328744	0.00280244
	15-19	248007	123778	124229		15-19	0.00114384	0.00188977		15-19	0.0279711					15-19	0.00358065	0.00401259	0.00315172
	20-24	210232	104435	105797		20-24	0.00373769	0.00433212		20-24	0.0381191					20-24	0.00458358	0.00533205	0.00384475
	25-29	167810	83062	84747.6		25-29	0.00475817	0.00445637		25-29	0.0681647					25-29	0.0057369	0.00624358	0.00524031
	30-34	126819	63291.6	63527.2		30-34	0.00473175	0.00379503		30-34	0.120657					30-34	0.00715668	0.00748647	0.00682811
	35-39	94717	43935.8	50781.3		35-39	0.00408773	0.00305602		35-39	0.176484					35-39	0.00911528	0.0100461	0.00830992
	40-44	84699.7	36212	48487.9		40-44	0.00321973	0.00245346		40-44	0.206161					40-44	0.0103817	0.0120337	0.00914783
	45-49	68123.4	30266.6	37856.6		45-49	0.00237637	0.00196421		45-49	0.199018					45-49	0.0116998	0.0142059	0.0096914
	50-54	51977.8	22523.8	29454		50-54	0.00172119	0.00149827		50-54	0.171788					50-54	0.0137856	0.0169003	0.0113976
	55-59	41656	17363.5	24292.4		55-59	0.00133855	0.00107539		55-59	0.130166					55-59	0.0165706	0.0201378	0.0140208
	60-64	31827.3	13748	18079.3		60-64	0.00123663	0.000754411		60-64	0.0937854					60-64	0.023123	0.0272929	0.0199621
	65-69	23221	10383.3	12837.5		65-69	0.00126332	0.000643855		65-69	0.0672822					65-69	0.034675	0.0394714	0.030796
	70-74	15596.2	6924.2	8671.97		70-74	0.00120857	0.000779536		70-74	0.0525302					70-74	0.0544049	0.060499	0.0495391
	75-79	9286.47	4003.27	5283.2		75-79	0.000813216	0.000207215		75-79	0.0414814					75-79	0.0865882	0.0956305	0.0797708
	80+	6413.94	2725.89	3688.23		80+	0	0		80+	0.0277914					80+	0.181975	0.194906	0.17236
	Total	2.24105e+06	1.09655e+06	1.1445e+06		Total	0.00175847	0.00173021		Total	0.0579576					Total	0.0113162	0.0125838	0.0101016
	2020	0	0	0		2020				2020						2020
	0-4	420693	212834	207859		0-4	0.00106666	0.00105545		0-4	0.0139387					0-4	0.0250964	0.0285892	0.0215191
	5-9	362995	182478	180516		5-9	0	0		5-9	0.0276304					5-9	0.0046311	0.00519229	0.00406382
	10-14	304643	152641	152002		10-14	0	0		10-14	0.0285115					10-14	0.00290069	0.00314578	0.00265456
	15-19	255117	127349	127768		15-19	0.000963034	0.00158531		15-19	0.0283953					15-19	0.00352562	0.00394135	0.00311126
	20-24	216500	107530	108969		20-24	0.00315188	0.00363976		20-24	0.037939					20-24	0.00448856	0.00524597	0.00374281
	25-29	174864	86486.8	88377.6		25-29	0.00400749	0.00374341		25-29	0.0630952					25-29	0.00559149	0.0061158	0.00508044
	30-34	133188	66272.5	66915.6		30-34	0.00398506	0.0031885		30-34	0.111787					30-34	0.0070145	0.00733026	0.00670448
	35-39	98400.7	46926.1	51474.6		35-39	0.00344682	0.00256814		35-39	0.166765					35-39	0.009113	0.00988493	0.00840928
	40-44	84831.3	36341.6	48489.5		40-44	0.00271082	0.00205836		40-44	0.203451					40-44	0.010404	0.0120108	0.00919986
	45-49	71615.5	31208.3	40407		45-49	0.00199606	0.00164857		45-49	0.200184					45-49	0.0116962	0.0141838	0.00977503
	50-54	53459.1	23645.7	29813.5		50-54	0.00145102	0.00126305		50-54	0.177308					50-54	0.0138139	0.0168651	0.011394
	55-59	43033.2	17760.9	25272.4		55-59	0.00114202	0.000897508		55-59	0.13654					55-59	0.0164404	0.0200343	0.0139147
	60-64	32980.2	14117.4	18862.8		60-64	0.00103554	0.000636798		60-64	0.0993687					60-64	0.0228753	0.0271051	0.0197096
	65-69	23995.9	10605.9	13390.2		65-69	0.00105518	0.000539823		65-69	0.0706735					65-69	0.034235	0.0391215	0.0303642
	70-74	16196.2	7204.62	8991.55		70-74	0.0010127	0.000639377		70-74	0.0545447					70-74	0.0537661	0.0598802	0.0488469
	75-79	9587.37	4109.13	5478.24		75-79	0.000717896	0.000151893		75-79	0.0431123					75-79	0.0855911	0.0946667	0.0787837
	80+	6647.41	2799.66	3847.75		80+	0	0		80+	0.0287951					80+	0.180683	0.193655	0.171244
	Total	2.30875e+06	1.13031e+06	1.17844e+06		Total	0.00150853	0.00147555		Total	0.0564525					Total	0.0110179	0.0122541	0.00983216
	2021	0	0	0		2021				2021						2021
	0-4	429527	217330	212196		0-4	0.000884284	0.000874526		0-4	0.0109852					0-4	0.0251576	0.0286558	0.0215747
	5-9	372553	187344	185209		5-9	0	0		5-9	0.0252427					5-9	0.00460863	0.0051687	0.0040421
	10-14	315022	157895	157127		10-14	0	0		10-14	0.0294403					10-14	0.00283159	0.00307096	0.00258989
	15-19	262810	131219	131591		15-19	0.000866135	0.00142219		15-19	0.0284765					15-19	0.0035638	0.00397153	0.00315723
	20-24	222511	110505	112006		20-24	0.00283489	0.00326697		20-24	0.0378897					20-24	0.00450171	0.00526387	0.00374976
	25-29	181920	89937	91983		25-29	0.00360546	0.0033572		25-29	0.0587415					25-29	0.00557391	0.00610087	0.0050567
	30-34	139775	69342.8	70432.4		30-34	0.00358345	0.00286329		30-34	0.102628					30-34	0.00696405	0.00726971	0.00666312
	35-39	103014	50346.4	52667.9		35-39	0.00310038	0.00230326		35-39	0.156028					35-39	0.0091958	0.00980385	0.00861799
	40-44	84668	36388.9	48279.1		40-44	0.00243402	0.00184895		40-44	0.197596					40-44	0.0105204	0.01204	0.00937513
	45-49	74856.2	32081.3	42774.9		45-49	0.00179296	0.00147765		45-49	0.199321					45-49	0.0118171	0.0142555	0.00998398
	50-54	55276.5	24778.6	30497.7		50-54	0.00130556	0.00114025		50-54	0.180277					50-54	0.0139697	0.0169572	0.0115425
	55-59	44389.1	18258.1	26131		55-59	0.00101679	0.000801444		55-59	0.142109					55-59	0.016563	0.0201539	0.014054
	60-64	34150.4	14479.9	19670.5		60-64	0.000939898	0.000569109		60-64	0.104351					60-64	0.0229672	0.0272527	0.0198126
	65-69	24812.1	10832.7	13979.3		65-69	0.000957879	0.000480945		65-69	0.0738599					65-69	0.0342777	0.0392229	0.0304461
	70-74	16804.7	7471.63	9333.05		70-74	0.000940537	0.000592522		70-74	0.0562484					70-74	0.0538579	0.0600209	0.048924
	75-79	9910.02	4232.57	5677.63		75-79	0.00062208	0.000147696		75-79	0.0445418					75-79	0.085603	0.0946467	0.0788902
	80+	6884.14	2874.16	4009.8		80+	0	0		80+	0.0296314					80+	0.18071	0.193744	0.171376
	Total	2.37888e+06	1.16532e+06	1.21357e+06		Total	0.00135303	0.00131698		Total	0.0545734					Total	0.0110148	0.0122192	0.00985822
	2022					2022				2022						2022
	0-4	439707	222499	217208		0-4	0.000799717	0.000791589		0-4	0.00891496					0-4	0.0252735	0.0287893	0.0216728
	5-9	381108	191706	189401		5-9	0	0		5-9	0.023424					5-9	0.00459412	0.00515889	0.00402248
	10-14	325839	163374	162465		10-14	0	0		10-14	0.0289526					10-14	0.00275428	0.00298683	0.00252042
	15-19	271303	135496	135807		15-19	0.000813149	0.00133381		15-19	0.0282584					15-19	0.00356984	0.00396924	0.00317134
	20-24	228455	113453	115001		20-24	0.00266518	0.00306503		20-24	0.0380367					20-24	0.00451709	0.00528367	0.00376084
	25-29	188919	93373.7	95545.6		25-29	0.00338832	0.0031499		25-29	0.0555646					25-29	0.00556793	0.00609763	0.00505028
	30-34	146517	72501.7	74015.7		30-34	0.0033676	0.00268361		30-34	0.0942278					30-34	0.00688607	0.00720299	0.00657564
	35-39	108621	54212.8	54408.4		35-39	0.00291306	0.00216245		35-39	0.145911					35-39	0.00922344	0.0097065	0.00874542
	40-44	84418.7	36396.2	48022.6		40-44	0.00228696	0.00173735		40-44	0.190036					40-44	0.0105751	0.0119927	0.00950069
	45-49	77576.7	32891.5	44685.1		45-49	0.00168791	0.00138108		45-49	0.197945					45-49	0.0118934	0.0142846	0.0101292
	50-54	57556.1	25864.4	31691.6		50-54	0.00123658	0.00106677		50-54	0.181913					50-54	0.0140589	0.0170093	0.0116511
	55-59	45717.2	18897.2	26820		55-59	0.000950999	0.000761968		55-59	0.147868					55-59	0.0166845	0.0202396	0.0141796
	60-64	35326.9	14826.2	20500.9		60-64	0.000888273	0.000535504		60-64	0.109277					60-64	0.0230336	0.0273743	0.0198943
	65-69	25682.9	11079.2	14603.7		65-69	0.000892948	0.00046794		65-69	0.0773259					65-69	0.0343012	0.0392991	0.0304971
	70-74	17411.6	7711.44	9700.12		70-74	0.000874601	0.000546365		70-74	0.0581041					70-74	0.0539274	0.0601288	0.0489788
	75-79	10259.3	4377.77	5881.56		75-79	0.000598441	0.00014397		75-79	0.0459509					75-79	0.0856391	0.0946131	0.0789595
	80+	7124.68	2949.39	4175.29		80+	0	0		80+	0.0305036					80+	0.18074	0.193842	0.171486
	Total	2.45154e+06	1.20161e+06	1.24993e+06		Total	0.00127456	0.00123533		Total	0.0527802					Total	0.0110181	0.012198	0.00988376
	2023					2023				2023						2023
	0-4	451539	228492	223047		0-4	0.000645707	0.000640222		0-4	0.00827965					0-4	0.0253803	0.0289092	0.0217653
	5-9	389285	195877	193408		5-9	0	0		5-9	0.0205371					5-9	0.00456513	0.0051388	0.0039832
	10-14	336608	168835	167774		10-14	0	0		10-14	0.0281808					10-14	0.00267639	0.00289989	0.00245148
	15-19	280298	140036	140263		15-19	0.000759718	0.00124412		15-19	0.0283024					15-19	0.0035762	0.00396872	0.00318303
	20-24	234507	116456	118051		20-24	0.0024908	0.00286312		20-24	0.0378481					20-24	0.00453424	0.00530464	0.00377425
	25-29	195678	96705.9	98972.1		25-29	0.00316827	0.00293958		25-29	0.0534644					25-29	0.00557571	0.00610496	0.00505858
	30-34	153342	75729.2	77612.4		30-34	0.00314702	0.00250573		30-34	0.0867247					30-34	0.0067924	0.00713537	0.00645776
	35-39	114155	56907.2	57247.4		35-39	0.00272582	0.00201849		35-39	0.135735					35-39	0.00917332	0.00956865	0.00878035
	40-44	86283.6	38450.4	47833.3		40-44	0.00214212	0.00161949		40-44	0.180468					40-44	0.0106029	0.0118612	0.00958755
	45-49	78703.8	33202.8	45501.2		45-49	0.0015719	0.00129605		45-49	0.195801					45-49	0.0119395	0.0142872	0.0102224
	50-54	60338	26878.2	33459.6		50-54	0.00115435	0.000992509		50-54	0.182583					50-54	0.0140926	0.0170219	0.0117397
	55-59	46977.8	19696.1	27281.7		55-59	0.000901648	0.000712045		55-59	0.153521					55-59	0.016804	0.0203022	0.0142785
	60-64	36525.6	15147.5	21377.9		60-64	0.000814013	0.00050198		60-64	0.114049					60-64	0.0230767	0.0274756	0.01996
	65-69	26607.8	11353.6	15253.9		65-69	0.000831457	0.000435002		65-69	0.0811327					65-69	0.0343216	0.0393869	0.0305519
	70-74	18014.5	7919.9	10094.6		70-74	0.000814704	0.00050129		70-74	0.0601485					70-74	0.053964	0.0602627	0.0490402
	75-79	10638.2	4546.35	6092.01		75-79	0.000575678	0.000140598		75-79	0.0473599					75-79	0.0856734	0.0945736	0.0790288
	80+	7369.21	3024.98	4344.23		80+	0	0		80+	0.0314123					80+	0.180745	0.193912	0.171576
	Total	2.52687e+06	1.23926e+06	1.28761e+06		Total	0.00117921	0.00113922		Total	0.0510887					Total	0.0110213	0.0121812	0.00990495
	2024					2024				2024						2024
	0-4	465319	235463	229855		0-4	0.000576797	0.000570721		0-4	0.00815365					0-4	0.0253919	0.0289286	0.0217696
	5-9	396861	199735	197126		5-9	0	0		5-9	0.0167811					5-9	0.00453508	0.00512212	0.00394026
	10-14	347192	174200	172992		10-14	0	0		10-14	0.0277641					10-14	0.0026089	0.00282306	0.00239325
	15-19	289797	144840	144957		15-19	0.000705289	0.00115953		15-19	0.0285415					15-19	0.00356845	0.00395849	0.00317872
	20-24	240922	119651	121271		20-24	0.00232035	0.00266707		20-24	0.037921					20-24	0.0045527	0.00532207	0.0037936
	25-29	202092	99873	102219		25-29	0.00295171	0.00273845		25-29	0.0522498					25-29	0.00558981	0.00612371	0.00506816
	30-34	160214	79010.8	81203.4		30-34	0.00292978	0.00233494		30-34	0.0802344					30-34	0.00669676	0.00707302	0.00632844
	35-39	120023	59697.4	60326.1		35-39	0.00254188	0.00188164		35-39	0.126093					35-39	0.00906911	0.00942202	0.00871987
	40-44	88938.3	40903.2	48035.1		40-44	0.00199192	0.00151414		40-44	0.170172					40-44	0.010588	0.011695	0.00964162
	45-49	79259.7	33417.2	45842.3		45-49	0.0014711	0.00120319		45-49	0.192775					45-49	0.0119358	0.0142443	0.0102531
	50-54	63503.8	27822.2	35681.6		50-54	0.00106722	0.000928414		50-54	0.18271					50-54	0.0140951	0.0170176	0.0118163
	55-59	48204.6	20629.2	27575.4		55-59	0.000827113	0.000663049		55-59	0.158398					55-59	0.0169141	0.0203416	0.0143499
	60-64	37756.7	15461.3	22295.4		60-64	0.00076234	0.000469236		60-64	0.118796					60-64	0.023102	0.0275628	0.0200085
	65-69	27574.5	11651.8	15922.8		65-69	0.000772355	0.000403635		65-69	0.0852161					65-69	0.0343411	0.039468	0.0306004
	70-74	18621	8104.25	10516.9		70-74	0.000760407	0.000486586		70-74	0.0624288					70-74	0.0539878	0.0603458	0.0490701
	75-79	11043.8	4732.14	6311.7		75-79	0.000492775	9.16152e-05		75-79	0.048758					75-79	0.0857269	0.0946143	0.0790638
	80+	7619.36	3102.56	4516.98		80+	0	0		80+	0.0324188					80+	0.180758	0.193971	0.171676
	Total	2.60494e+06	1.27829e+06	1.32665e+06		Total	0.00110024	0.00106004		Total	0.0495068					Total	0.0110134	0.012158	0.00991069
	2025					2025				2025						2025
	0-4	481035	243415	237620		0-4	0.000446753	0.00044226		0-4	0.00788626					0-4	0.0253774	0.0289123	0.0217563
	5-9	404100	203406	200694		5-9	0	0		5-9	0.0132554					5-9	0.00450004	0.00509919	0.00389278
	10-14	357420	179392	178028		10-14	0	0		10-14	0.0264885					10-14	0.00258039	0.00278884	0.00237137
	15-19	299528	149761	149767		15-19	0.000654413	0.00107597		15-19	0.0298411					15-19	0.00344101	0.00382598	0.00305485
	20-24	247881	123136	124745		20-24	0.00215461	0.00247904		20-24	0.0379455					20-24	0.00457186	0.00533923	0.00381584
	25-29	208182	102872	105310		25-29	0.00274103	0.00254495		25-29	0.0515912					25-29	0.00562479	0.00616192	0.00510009
	30-34	167114	82341.6	84772.4		30-34	0.00272179	0.00216723		30-34	0.0748896					30-34	0.00663612	0.00704447	0.00623948
	35-39	126192	62586.5	63605.7		35-39	0.00235985	0.00175034		35-39	0.116897					35-39	0.00896478	0.00932306	0.00861509
	40-44	92443.2	43762.5	48680.8		40-44	0.00184921	0.00140639		40-44	0.1597					40-44	0.0105944	0.0115812	0.00970736
	45-49	79393.5	33549.7	45843.8		45-49	0.00136162	0.00111717		45-49	0.188503					45-49	0.0119454	0.0142205	0.0102804
	50-54	66779.5	28698.5	38081		50-54	0.000988559	0.000856115		50-54	0.182194					50-54	0.0141095	0.0170349	0.0119048
	55-59	49554.7	21649.2	27905.4		55-59	0.000784275	0.000615588		55-59	0.162328					55-59	0.0170239	0.020388	0.0144141
	60-64	39000.4	15811.3	23189.1		60-64	0.000711855	0.000423335		60-64	0.123694					60-64	0.0231461	0.0276405	0.0200816
	65-69	28572.1	11961.6	16610.7		65-69	0.000714593	0.00037338		65-69	0.0895375					65-69	0.0343854	0.0395672	0.0306536
	70-74	19245.4	8276.45	10969		70-74	0.000711082	0.000444668		70-74	0.0649772					70-74	0.0539879	0.0604481	0.0491134
	75-79	11467.1	4923.02	6544.09		75-79	0.000475498	8.95073e-05		75-79	0.0501529					75-79	0.0857875	0.0946648	0.0791092
	80+	7879.11	3185.94	4693.17		80+	0	0		80+	0.0333947					80+	0.180735	0.193958	0.171759
	Total	2.68579e+06	1.31873e+06	1.36706e+06		Total	0.00100976	0.000971142		Total	0.0479804					Total	0.0110095	0.0121419	0.00991712
	2026					2026				2026						2026
	0-4	497182	251585	245598		0-4	0.000394014	0.000390069		0-4	0.00770752					0-4	0.025349	0.0288819	0.0217293
	5-9	412592	207701	204891		5-9	0	0		5-9	0.010616					5-9	0.00447419	0.00508015	0.00385993
	10-14	366895	184207	182688		10-14	0	0		10-14	0.0242293					10-14	0.00256464	0.00277301	0.00235553
	15-19	309814	154961	154853		15-19	0.000607517	0.000998605		15-19	0.0314703					15-19	0.00333146	0.00371515	0.0029475
	20-24	255417	126917	128500		20-24	0.00199995	0.00230119		20-24	0.0378426					20-24	0.00459523	0.00535586	0.00384256
	25-29	214023	105753	108270		25-29	0.00254513	0.0023639		25-29	0.0512876					25-29	0.00567034	0.00621519	0.00513815
	30-34	174009	85695.6	88313.3		30-34	0.00252529	0.00201161		30-34	0.0706463					30-34	0.00660652	0.00704163	0.00618431
	35-39	132608	65569.2	67038.9		35-39	0.00219233	0.00162512		35-39	0.108257					35-39	0.00885637	0.00925004	0.00847132
	40-44	96854.9	47039	49815.7		40-44	0.00171528	0.00130301		40-44	0.149511					40-44	0.0106059	0.0114989	0.00976275
	45-49	79272.4	33618.2	45654.3		45-49	0.00126941	0.00104395		45-49	0.182744					45-49	0.0119476	0.0141915	0.0102953
	50-54	69836.4	29520.2	40316.2		50-54	0.000916	0.00079976		50-54	0.181155					50-54	0.0141356	0.0170704	0.0119867
	55-59	51230.5	22685.3	28545.1		55-59	0.00073026	0.000574198		55-59	0.165096					55-59	0.0171039	0.0204396	0.0144593
	60-64	40225.2	16253.3	23972.1		60-64	0.0006627	0.00039439		60-64	0.128774					60-64	0.0232164	0.0277143	0.0201667
	65-69	29587.1	12266.1	17321.1		65-69	0.00068395	0.000343972		65-69	0.0939693					65-69	0.0344312	0.0396932	0.0307045
	70-74	19905.1	8453.37	11451.5		70-74	0.000665799	0.00040516		70-74	0.0677728					70-74	0.0539746	0.0605125	0.0491492
	75-79	11896.3	5103.92	6792.42		75-79	0.00046004	8.72934e-05		75-79	0.0516433					75-79	0.0858767	0.0948254	0.0791524
	80+	8152.46	3279.47	4872.81		80+	0	0		80+	0.0345229					80+	0.1807	0.193843	0.171825
	Total	2.7695e+06	1.36061e+06	1.40889e+06		Total	0.00093747	0.0009004		Total	0.0465435					Total	0.0110102	0.0121333	0.00992551
	2027					2027				2027						2027
	0-4	513829	260006	253822		0-4	0.000288681	0.00028634		0-4	0.00756381					0-4	0.0253255	0.0288576	0.0217072
	5-9	422398	212647	209751		5-9	0	0		5-9	0.00882291					5-9	0.00446174	0.00507366	0.00384136
	10-14	375348	188510	186838		10-14	0	0		10-14	0.0224443					10-14	0.00255711	0.00276837	0.00234396
	15-19	320559	160396	160163		15-19	0.000563357	0.000926515		15-19	0.0317684					15-19	0.00326163	0.00364464	0.00287807
	20-24	263750	131102	132648		20-24	0.00185557	0.00213998		20-24	0.0375019					20-24	0.00461155	0.005366	0.00386589
	25-29	219800	108607	111193		25-29	0.00236231	0.00219601		25-29	0.051145					25-29	0.0057118	0.00626715	0.00516937
	30-34	180837	89031.4	91805.5		30-34	0.00234248	0.00187037		30-34	0.06746					30-34	0.00658961	0.00704858	0.00614453
	35-39	139198	68640.8	70557.5		35-39	0.00203319	0.00151158		35-39	0.100312					35-39	0.00872617	0.0091715	0.00829037
	40-44	102231	50742.7	51488.4		40-44	0.00159759	0.00121273		40-44	0.139883					40-44	0.0105784	0.0114098	0.00975891
	45-49	79085	33657.8	45427.2		45-49	0.00117317	0.00096534		45-49	0.175442					45-49	0.0119049	0.0140995	0.0102789
	50-54	72415.4	30288	42127.4		50-54	0.000851548	0.00074043		50-54	0.179633					50-54	0.0141403	0.0170685	0.012035
	55-59	53347.8	23682.5	29665.4		55-59	0.000675606	0.000526434		55-59	0.166607					55-59	0.0171318	0.0204592	0.0144755
	60-64	41422.5	16823.2	24599.3		60-64	0.000614527	0.000367463		60-64	0.134071					60-64	0.0233024	0.0277559	0.0202567
	65-69	30608.9	12557.1	18052		65-69	0.000626343	0.000314891		65-69	0.098353					65-69	0.0344603	0.0397985	0.0307467
	70-74	20609.5	8646.05	11963.4		70-74	0.000588951	0.000394176		70-74	0.0708221					70-74	0.0539592	0.0605686	0.0491826
	75-79	12325.6	5265.61	7059.97		75-79	0.000390618	8.49468e-05		75-79	0.053225					75-79	0.0859303	0.0949775	0.0791825
	80+	8441.95	3385.15	5056.61		80+	0	0		80+	0.0356101					80+	0.180666	0.193735	0.171924
	Total	2.85621e+06	1.40399e+06	1.45222e+06		Total	0.000859019	0.000824609		Total	0.0451749					Total	0.011014	0.0121304	0.00993471
	2028					2028				2028						2028
	0-4	531014	268700	262313		0-4	0.000249094	0.000246349		0-4	0.00745639					0-4	0.025307	0.0288393	0.0216887
	5-9	433769	218370	215399		5-9	0	0		5-9	0.0083313					5-9	0.00446596	0.00508015	0.0038433
	10-14	383418	192618	190800		10-14	0	0		10-14	0.0196145					10-14	0.00254064	0.00275827	0.00232093
	15-19	331270	165821	165450		15-19	0.000520261	0.000859444		15-19	0.0317578					15-19	0.00320213	0.00358552	0.00281788
	20-24	272583	135548	137034		20-24	0.00171752	0.00198565		20-24	0.0374465					20-24	0.00462505	0.00537588	0.00388236
	25-29	225683	111514	114169		25-29	0.00218831	0.0020393		25-29	0.050675					25-29	0.00574843	0.00631019	0.00519973
	30-34	187419	92260	95159.7		30-34	0.00216915	0.00173287		30-34	0.0652308					30-34	0.00658159	0.00706519	0.00611462
	35-39	145880	71778.7	74101.8		35-39	0.00188112	0.00140332		35-39	0.0931913					35-39	0.00858864	0.00909633	0.00809687
	40-44	107574	53348.2	54226.1		40-44	0.00147866	0.00112715		40-44	0.130261					40-44	0.0104809	0.0112875	0.00969076
	45-49	80888	35623.8	45264.3		45-49	0.00109065	0.000898209		45-49	0.166391					45-49	0.0118681	0.0139065	0.0102599
	50-54	73506.3	30595.8	42910.5		50-54	0.000791803	0.000683311		50-54	0.177421					50-54	0.0141376	0.0170509	0.0120604
	55-59	55941.2	24616.7	31324.5		55-59	0.000623443	0.00049352		55-59	0.167183					55-59	0.0171153	0.0204486	0.0144958
	60-64	42554.1	17535	25019		60-64	0.000564913	0.000341837		60-64	0.139279					60-64	0.0234069	0.027787	0.0203372
	65-69	31651.7	12827.3	18824.4		65-69	0.000568676	0.000304345		65-69	0.102644					65-69	0.0344703	0.0398785	0.0307755
	70-74	21356.8	8860.31	12496.5		70-74	0.000549382	0.000358262		70-74	0.0741865					70-74	0.0539467	0.0606178	0.0492167
	75-79	12753.2	5405.91	7347.28		75-79	0.000380443	8.25086e-05		75-79	0.0550226					75-79	0.0859628	0.0951279	0.0792194
	80+	8748.65	3502.8	5245.85		80+	0	0		80+	0.0367229					80+	0.180632	0.193593	0.171977
	Total	2.94601e+06	1.44893e+06	1.49709e+06		Total	0.000794577	0.000762972		Total	0.0438697					Total	0.0110165	0.0121278	0.00994088
	2029					2029				2029						2029
	0-4	548729	277663	271066		0-4	0.000179282	0.000177488		0-4	0.00734313					0-4	0.0252901	0.0288218	0.0216725
	5-9	447019	225035	221984		5-9	0	0		5-9	0.00833608					5-9	0.00446578	0.0050795	0.00384362
	10-14	390891	196412	194479		10-14	0	0		10-14	0.0158684					10-14	0.00252035	0.00274836	0.00229008
	15-19	341790	171147	170643		15-19	0.00047943	0.000792851		15-19	0.0320039					15-19	0.00315927	0.00354383	0.00277356
	20-24	281914	140254	141660		20-24	0.00158225	0.00183255		20-24	0.03761					20-24	0.0046385	0.00538551	0.00389891
	25-29	231926	114613	117313		25-29	0.00201639	0.00188254		25-29	0.0504757					25-29	0.00578284	0.00635151	0.00522725
	30-34	193660	95323.9	98336		30-34	0.00199893	0.00160189		30-34	0.0637916					30-34	0.00657918	0.00708911	0.00608486
	35-39	152612	74967.3	77645		35-39	0.00173292	0.00129441		35-39	0.087006					35-39	0.00845684	0.00902617	0.00790948
	40-44	113259	56046.9	57212.3		40-44	0.00136316	0.00104316		40-44	0.121135					40-44	0.0103502	0.011158	0.00955564
	45-49	83441.5	37968.3	45473.3		45-49	0.00100246	0.000831023		45-49	0.156675					45-49	0.0118156	0.0137162	0.0102247
	50-54	74068.4	30817.1	43251.3		50-54	0.000726295	0.000634438		50-54	0.174368					50-54	0.0141062	0.0169931	0.0120492
	55-59	58897.5	25489	33408.5		55-59	0.000576377	0.00045606		55-59	0.167222					55-59	0.0170779	0.0204315	0.0145193
	60-64	43653.5	18367	25286.7		60-64	0.000532102	0.000316758		60-64	0.143839					60-64	0.0235067	0.0278112	0.0203871
	65-69	32723.9	13091.8	19632.1		65-69	0.000537309	0.000276356		65-69	0.10696					65-69	0.0344654	0.0399452	0.0308111
	70-74	22137	9092.69	13044.3		70-74	0.000511377	0.000324082		70-74	0.0777936					70-74	0.0539452	0.0606834	0.0492482
	75-79	13185.3	5530.26	7655.07		75-79	0.000318899	8.00794e-05		75-79	0.0570299					75-79	0.08595	0.0952506	0.0792309
	80+	9070.94	3628.96	5441.98		80+	0	0		80+	0.0378139					80+	0.180648	0.193556	0.172041
	Total	3.03898e+06	1.49545e+06	1.54353e+06		Total	0.0007246	0.000696569		Total	0.0426285					Total	0.0110173	0.0121256	0.00994345
	2030					2030				2030						2030
	0-4	566953	286883	280070		0-4	0.000135378	0.000133929		0-4	0.00725777					0-4	0.0252701	0.0288009	0.0216527
	5-9	462169	232659	229510		5-9	0	0		5-9	0.00837141					5-9	0.00446059	0.00507277	0.00384
	10-14	398033	200024	198010		10-14	0	0		10-14	0.0124145					10-14	0.00249562	0.00273227	0.00225657
	15-19	351956	176302	175654		15-19	0.000439297	0.000729837		15-19	0.0309764					15-19	0.00315351	0.0035379	0.0027677
	20-24	291472	145074	146397		20-24	0.00145005	0.00168505		20-24	0.0391109					20-24	0.00462632	0.00537274	0.00388665
	25-29	238706	117997	120709		25-29	0.00184768	0.00173101		25-29	0.0502682					25-29	0.00580159	0.00637674	0.00524087
	30-34	199585	98223.5	101361		30-34	0.00183323	0.00146998		30-34	0.0628707					30-34	0.00657187	0.00710868	0.0060517
	35-39	159361	78199.7	81161.6		35-39	0.00158808	0.00118818		35-39	0.0819102					35-39	0.00833529	0.00895442	0.00773875
	40-44	119252	58841.3	60411.1		40-44	0.00125316	0.000956345		40-44	0.112513					40-44	0.0101766	0.0110162	0.00935872
	45-49	86803.3	40697.1	46106.2		45-49	0.000919137	0.000763281		45-49	0.146872					45-49	0.011738	0.013518	0.0101669
	50-54	74240.6	30965.9	43274.7		50-54	0.000666129	0.000585212		50-54	0.170265					50-54	0.0140393	0.016888	0.0120008
	55-59	61959.5	26300.9	35658.4		55-59	0.000521807	0.000414321		55-59	0.16671					55-59	0.017021	0.0203866	0.0145386
	60-64	44867.5	19276.1	25591.2		60-64	0.000476155	0.00029254		60-64	0.14757					60-64	0.0235777	0.0278068	0.0203924
	65-69	33805.7	13388.3	20417.5		65-69	0.000481393	0.000249841		65-69	0.111462					65-69	0.034467	0.039981	0.030851
	70-74	22941.1	9333.42	13607.5		70-74	0.00047425	0.00029126		70-74	0.0816899					70-74	0.0539507	0.0607497	0.049288
	75-79	13631.8	5647.36	7984.43		75-79	0.000313183	7.7754e-05		75-79	0.0592931					75-79	0.0859008	0.0952977	0.0792544
	80+	9405.38	3758.38	5647		80+	0	0		80+	0.0389996					80+	0.180662	0.193595	0.172054
	Total	3.13514e+06	1.54357e+06	1.59157e+06		Total	0.000660603	0.000635841		Total	0.0414598					Total	0.0110124	0.0121182	0.00994001
	2031					2031				2031						2031
	0-4	585647	296340	289307		0-4	7.59299e-05	7.55443e-05		0-4	0.00718647					0-4	0.0252465	0.0287773	0.0216299
	5-9	477735	240492	237243		5-9	0	0		5-9	0.00840034					5-9	0.00445602	0.00506659	0.00383709
	10-14	406401	204245	202156		10-14	0	0		10-14	0.00987874					10-14	0.00247011	0.00271218	0.00222553
	15-19	361369	181079	180290		15-19	0.00024621	0.000409445		15-19	0.0287511					15-19	0.00316065	0.00354568	0.00277394
	20-24	301585	150172	151413		20-24	0.000809387	0.000942646		20-24	0.0410093					20-24	0.00460522	0.00535211	0.00386445
	25-29	246053	121670	124382		25-29	0.00103192	0.000967633		25-29	0.0500094					25-29	0.0058015	0.00638089	0.00523475
	30-34	205269	101009	104259		30-34	0.00102243	0.00082314		30-34	0.0623251					30-34	0.00654796	0.0071154	0.00599994
	35-39	166094	81450.1	84643.5		35-39	0.00088707	0.000664236		35-39	0.0779091					35-39	0.00821351	0.00887303	0.00757887
	40-44	125498	61726.2	63772.3		40-44	0.000698329	0.000535183		40-44	0.104548					40-44	0.00997051	0.0108508	0.00911843
	45-49	91027.7	43819	47208.5		45-49	0.000511691	0.000428795		45-49	0.137463					45-49	0.0116274	0.0133037	0.0100715
	50-54	74178.4	31058.8	43119.7		50-54	0.000375335	0.000328873		50-54	0.164964					50-54	0.0139337	0.0167267	0.011922
	55-59	64820	27064.2	37755.8		55-59	0.000292731	0.000230581		55-59	0.165837					55-59	0.0169549	0.020314	0.0145471
	60-64	46384.3	20200.5	26183.8		60-64	0.00026841	0.000161314		60-64	0.150337					60-64	0.0235922	0.0277905	0.0203532
	65-69	34867	13763.9	21103.1		65-69	0.000273788	0.000136308		65-69	0.116242					65-69	0.0344889	0.03997	0.0309139
	70-74	23758.6	9569.42	14189.2		70-74	0.000265127	0.000171559		70-74	0.0857227					70-74	0.0539483	0.0608236	0.0493114
	75-79	14104.5	5768.26	8336.27		75-79	0.000187027	4.57829e-05		75-79	0.061818					75-79	0.0858233	0.0953114	0.0792581
	80+	9747.97	3885.09	5862.89		80+	0	0		80+	0.0402646					80+	0.180709	0.193767	0.172057
	Total	3.23454e+06	1.59331e+06	1.64123e+06		Total	0.000369584	0.000356422		Total	0.0403667					Total	0.0109994	0.0121019	0.00992909
	2032					2032				2032						2032
	0-4	604746	306002	298744		0-4	7.06492e-05	6.97237e-05		0-4	0.00708344					0-4	0.0252264	0.028756	0.0216105
	5-9	493774	248562	245212		5-9	0	0		5-9	0.00842043					5-9	0.00445261	0.00506253	0.0038351
	10-14	416064	209108	206955		10-14	0	0		10-14	0.00814679					10-14	0.002455	0.00270112	0.00220632
	15-19	369739	185333	184407		15-19	0.0002329	0.000387802		15-19	0.026954					15-19	0.00315626	0.00354058	0.00277001
	20-24	312172	155512	156660		20-24	0.000763589	0.000891173		20-24	0.0416227					20-24	0.00456517	0.00531402	0.0038218
	25-29	254185	125742	128443		25-29	0.000974283	0.000916157		25-29	0.049626					25-29	0.00578489	0.00636599	0.0052146
	30-34	210896	103772	107124		30-34	0.000965696	0.000778926		30-34	0.0619932					30-34	0.00651849	0.00711114	0.0059427
	35-39	172750	84679.2	88070.7		35-39	0.000837005	0.000628465		35-39	0.0749412					35-39	0.0081111	0.0088044	0.00744449
	40-44	131920	64696.2	67224		40-44	0.000660601	0.000508267		40-44	0.0973464					40-44	0.00976546	0.0106917	0.00887134
	45-49	96173.2	47342.5	48830.7		45-49	0.000486539	0.000406308		45-49	0.1287					45-49	0.0115048	0.0131061	0.00994855
	50-54	74056.8	31128.2	42928.6		50-54	0.000353083	0.000310786		50-54	0.158377					50-54	0.0138097	0.0165322	0.0118357
	55-59	67237	27779.3	39457.7		55-59	0.000278591	0.000222391		55-59	0.164625					55-59	0.0168954	0.0202283	0.014549
	60-64	48311.9	21091.6	27220.3		60-64	0.00024823	0.000153565		60-64	0.152001					60-64	0.0235476	0.0277594	0.0202841
	65-69	35898.6	14248.8	21649.8		65-69	0.000256289	0.000131701		65-69	0.121296					65-69	0.034543	0.0399328	0.0309957
	70-74	24582.3	9794.56	14787.7		70-74	0.000242735	0.000152403		70-74	0.08979					70-74	0.0539399	0.0609061	0.0493258
	75-79	14609.5	5900.05	8709.5		75-79	0.000154096	4.45441e-05		75-79	0.0646349					75-79	0.0857476	0.0953332	0.0792541
	80+	10096.9	4005.81	6091.1		80+	0	0		80+	0.0415746					80+	0.180748	0.193945	0.172068
	Total	3.33721e+06	1.6447e+06	1.69252e+06		Total	0.000349421	0.000337565		Total	0.0393431					Total	0.0109818	0.0120803	0.00991425
	2033					2033				2033						2033
	0-4	624178	315833	308345		0-4	6.56314e-05	6.46888e-05		0-4	0.00695818					0-4	0.0252011	0.0287305	0.0215865
	5-9	510327	256891	253436		5-9	0	0		5-9	0.0084632					5-9	0.00445062	0.00505928	0.00383366
	10-14	427269	214736	212534		10-14	0	0		10-14	0.0076532					10-14	0.00245383	0.00270124	0.00220385
	15-19	377713	189385	188328		15-19	0.000219963	0.000366467		15-19	0.0241595					15-19	0.0031381	0.0035213	0.00275276
	20-24	322732	160844	161888		20-24	0.000719333	0.000841324		20-24	0.0419805					20-24	0.00452194	0.00527309	0.00377677
	25-29	262811	130070	132741		25-29	0.000916981	0.000865995		25-29	0.0495834					25-29	0.00575986	0.00634648	0.00518505
	30-34	216631	106588	110042		30-34	0.000909076	0.000735857		30-34	0.0614362					30-34	0.00648401	0.0070967	0.00589055
	35-39	179160	87801.2	91358.5		35-39	0.000786527	0.000593367		35-39	0.072904					35-39	0.0080263	0.00874734	0.00733332
	40-44	138433	67729.2	70703.4		40-44	0.000622208	0.000479556		40-44	0.0910022					40-44	0.00957449	0.0105475	0.00864244
	45-49	101320	49843.6	51476.6		45-49	0.000456534	0.000382816		45-49	0.120128					45-49	0.0113247	0.0128921	0.00980693
	50-54	75784.5	32992.1	42792.3		50-54	0.000332204	0.000291492		50-54	0.150295					50-54	0.0137365	0.0162739	0.0117802
	55-59	68270.2	28073.3	40196.9		55-59	0.000259023	0.000209399		55-59	0.162892					55-59	0.0168601	0.0201585	0.014552
	60-64	50679.1	21928	28751.1		60-64	0.00023859	0.000146786		60-64	0.152831					60-64	0.0234742	0.0277174	0.0202381
	65-69	36867.4	14854.1	22013.4		65-69	0.000238106	0.000127218		65-69	0.126358					65-69	0.0346333	0.0399043	0.0310766
	70-74	25424.3	10003.6	15420.9		70-74	0.000240368	0.000147264		70-74	0.0938507					70-74	0.0539145	0.0609564	0.0493459
	75-79	15144.3	6046.69	9097.59		75-79	0.000152738	4.33769e-05		75-79	0.0677483					75-79	0.0857003	0.0953295	0.0792803
	80+	10452.9	4120.19	6332.73		80+	0	0		80+	0.043058					80+	0.180765	0.194149	0.172057
	Total	3.4432e+06	1.69774e+06	1.74546e+06		Total	0.000329495	0.000319046		Total	0.0383911					Total	0.0109608	0.0120545	0.00989694
	2034					2034				2034						2034
	0-4	643873	325796	318077		0-4	6.03992e-05	5.99093e-05		0-4	0.00678418					0-4	0.0251757	0.0287037	0.0215621
	5-9	527391	265477	261914		5-9	0	0		5-9	0.00845984					5-9	0.00444822	0.00505611	0.00383207
	10-14	440332	221294	219037		10-14	0	0		10-14	0.00769702					10-14	0.00244978	0.00269654	0.00220048
	15-19	385088	193122	191965		15-19	0.000206489	0.000346063		15-19	0.020444					15-19	0.00314108	0.00352354	0.00275631
	20-24	333094	166076	167019		20-24	0.000675309	0.000792965		20-24	0.0425846					20-24	0.00448304	0.00523578	0.00373454
	25-29	271932	134654	137278		25-29	0.000861531	0.000816335		25-29	0.0498006					25-29	0.00573133	0.0063243	0.00514969
	30-34	222717	109594	113122		30-34	0.00085451	0.000693198		30-34	0.0612176					30-34	0.00644193	0.00706909	0.00583432
	35-39	185234	90762.5	94471.8		35-39	0.00073963	0.00055996		35-39	0.0716446					35-39	0.00794216	0.00868761	0.00722597
	40-44	144990	70809.6	74180.6		40-44	0.000583857	0.000451074		40-44	0.085605					40-44	0.00939399	0.0104009	0.00843036
	45-49	106805	52434.3	54370.5		45-49	0.000430092	0.000360624		45-49	0.112115					45-49	0.0111216	0.0126735	0.009625
	50-54	78217.4	35209.4	43007.8		50-54	0.000313415	0.000276263		50-54	0.141727					50-54	0.0136522	0.0160213	0.0117127
	55-59	68815.1	28289.9	40525		55-59	0.000246591	0.000196366		55-59	0.160447					55-59	0.0168083	0.0200682	0.0145326
	60-64	53378.8	22710.2	30668.7		60-64	0.000220609	0.000135054		60-64	0.153198					60-64	0.0233906	0.0276727	0.0202198
	65-69	37806	15560.3	22245.8		65-69	0.000232804	0.000122583		65-69	0.130887					65-69	0.0347276	0.0398756	0.0311186
	70-74	26291.1	10208.9	16082.2		70-74	0.000218063	0.000142058		70-74	0.0979781					70-74	0.0538813	0.0609908	0.049357
	75-79	15701.1	6205.3	9495.83		75-79	0.000151647	4.22552e-05		75-79	0.0711482					75-79	0.0856625	0.0953758	0.0793151
	80+	10819.6	4230.94	6588.5		80+	0	0		80+	0.0446784					80+	0.180737	0.194293	0.172036
	Total	3.55248e+06	1.75243e+06	1.80005e+06		Total	0.000309925	0.000300795		Total	0.0374985					Total	0.0109373	0.0120254	0.00987795
	2035					2035				2035						2035
	0-4	663756	335854	327902		0-4	5.58935e-05	5.53757e-05		0-4	0.00657123					0-4	0.0251504	0.0286769	0.0215385
	5-9	544943	274308	270635		5-9	0	0		5-9	0.00840305					5-9	0.00444632	0.0050539	0.00383049
	10-14	455269	228798	226471		10-14	0	0		10-14	0.00777816					10-14	0.00244426	0.0026905	0.00219629
	15-19	392136	196680	195456		15-19	0.000194048	0.000326505		15-19	0.0170804					15-19	0.00312808	0.00350866	0.00274512
	20-24	343103	171134	171968		20-24	0.000634367	0.000746981		20-24	0.0417482					20-24	0.00446427	0.00521977	0.00371243
	25-29	281278	139351	141927		25-29	0.000808927	0.000768196		25-29	0.0515513					25-29	0.00567364	0.00627112	0.00508701
	30-34	229330	112880	116450		30-34	0.000802789	0.000651824		30-34	0.061088					30-34	0.00639449	0.00703355	0.00577502
	35-39	191004	93566.2	97437.5		35-39	0.000693401	0.000526015		35-39	0.0709077					35-39	0.00786454	0.00863265	0.00712695
	40-44	151556	73930.1	77626.3		40-44	0.000547672	0.00042481		40-44	0.0812636					40-44	0.00923698	0.0102733	0.0082523
	45-49	112595	55117	57478.4		45-49	0.000405587	0.000341007		45-49	0.104627					45-49	0.0109135	0.012471	0.0094231
	50-54	81410.4	37784.7	43625.8		50-54	0.000291191	0.000260296		50-54	0.133171					50-54	0.0135665	0.0157977	0.0116341
	55-59	69001.7	28442.5	40559.1		55-59	0.000229337	0.000183168		55-59	0.157063					55-59	0.0167418	0.0199541	0.0144891
	60-64	56174.3	23439.8	32734.6		60-64	0.000212621	0.000130717		60-64	0.153098					60-64	0.0233205	0.0276156	0.020245
	65-69	38846.7	16331.2	22515.5		65-69	0.000211498	0.000109491		65-69	0.13472					65-69	0.0347912	0.039869	0.0311162
	70-74	27163.5	10440.6	16722.9		70-74	0.000215931	0.000136984		70-74	0.102364					70-74	0.0538658	0.0609917	0.049406
	75-79	16273.9	6368.98	9904.95		75-79	0.000150679	4.11376e-05		75-79	0.0747954					75-79	0.0856436	0.0954292	0.0793514
	80+	11200.6	4340.43	6860.21		80+	0	0		80+	0.0464626					80+	0.18069	0.194362	0.172039
	Total	3.66504e+06	1.80877e+06	1.85627e+06		Total	0.000290985	0.00028317		Total	0.0366651					Total	0.0109093	0.0119915	0.00985491
	2036					2036				2036						2036
	0-4	683814	346000	337814		0-4	5.11765e-05	5.10739e-05		0-4	0.00635077					0-4	0.0251255	0.0286501	0.0215161
	5-9	562945	283366	279579		5-9	0	0		5-9	0.00829676					5-9	0.00444452	0.00505164	0.00382854
	10-14	470616	236507	234109		10-14	0	0		10-14	0.00784948					10-14	0.00243966	0.00268482	0.00219199
	15-19	400394	200840	199554		15-19	0.000182533	0.000306405		15-19	0.0146818					15-19	0.00310295	0.00348201	0.00272144
	20-24	352367	175821	176546		20-24	0.000594857	0.000702872		20-24	0.0396349					20-24	0.00445236	0.0052095	0.00369832
	25-29	291177	144322	146855		25-29	0.000758738	0.000722405		25-29	0.0537629					25-29	0.00561212	0.00621715	0.00501753
	30-34	236494	116448	120046		30-34	0.000752649	0.000613069		30-34	0.0609722					30-34	0.00634795	0.00699396	0.0057213
	35-39	196542	96261.6	100280		35-39	0.000649725	0.000495318		35-39	0.0705473					35-39	0.00779417	0.008583	0.00703697
	40-44	158097	77065.3	81031.8		40-44	0.000511659	0.000398783		40-44	0.0779347					40-44	0.00910936	0.0101658	0.00810458
	45-49	118636	57885.8	60749.9		45-49	0.000378504	0.000319113		45-49	0.097754					45-49	0.0107154	0.0122909	0.00921403
	50-54	85415.5	40724.4	44691.1		50-54	0.000273433	0.000243717		50-54	0.125016					50-54	0.0134907	0.0156187	0.0115515
	55-59	68973.7	28546.8	40427		55-59	0.000213577	0.00017461		55-59	0.152559					55-59	0.0166618	0.0198178	0.0144334
	60-64	58784.4	24126.6	34657.8		60-64	0.000193827	0.000122623		60-64	0.152646					60-64	0.0232718	0.0275582	0.0202826
	65-69	40159.2	17115	23044.4		65-69	0.000196591	0.00010396		65-69	0.137661					65-69	0.0348006	0.0398543	0.0310391
	70-74	28014.7	10735.9	17278.9		70-74	0.000194532	0.000120166		70-74	0.107034					70-74	0.0538919	0.0609519	0.0495054
	75-79	16856.3	6528.5	10327.8		75-79	0.000119786	3.99918e-05		75-79	0.0786195					75-79	0.085631	0.0954853	0.0793843
	80+	11600.9	4451.73	7149.15		80+	0	0		80+	0.0484233					80+	0.180612	0.19443	0.172008
	Total	3.78089e+06	1.86674e+06	1.91414e+06		Total	0.000272827	0.000266157		Total	0.0358912					Total	0.0108801	0.0119564	0.00983048
	2037					2037				2037						2037
	0-4	704072	356248	347824		0-4	4.75563e-05	4.69883e-05		0-4	0.00615106					0-4	0.0251054	0.0286278	0.0214977
	5-9	581337	292620	288717		5-9	0	0		5-9	0.00812593					5-9	0.00444204	0.00504984	0.00382602
	10-14	486427	244447	241980		10-14	0	0		10-14	0.00790568					10-14	0.00243601	0.00267991	0.00218961
	15-19	409936	205635	204300		15-19	0.000170451	0.000287361		15-19	0.0130244					15-19	0.00308201	0.00345987	0.00270258
	20-24	360593	179989	180605		20-24	0.000557848	0.000660004		20-24	0.0378789					20-24	0.00444478	0.00520368	0.00368847
	25-29	301555	149536	152019		25-29	0.000710526	0.000678528		25-29	0.0548322					25-29	0.00553498	0.00614582	0.00493532
	30-34	244426	120405	124021		30-34	0.000704438	0.000576017		30-34	0.0607984					30-34	0.00630064	0.00695077	0.00566946
	35-39	202028	98936.4	103091		35-39	0.000609184	0.000464165		35-39	0.0704076					35-39	0.0077288	0.00853783	0.00695237
	40-44	164555	80177.1	84378		40-44	0.00047965	0.000375032		40-44	0.0755497					40-44	0.00900742	0.0100788	0.00798727
	45-49	124846	60735	64111.3		45-49	0.000355169	0.000300873		45-49	0.0915663					45-49	0.0105337	0.0121322	0.00901933
	50-54	90289.4	44035.4	46254		50-54	0.000256128	0.000230904		50-54	0.117447					50-54	0.0134189	0.0154817	0.0114551
	55-59	68894	28632.3	40261.7		55-59	0.000203657	0.000164989		55-59	0.146843					55-59	0.0165654	0.0196509	0.0143666
	60-64	60988	24770.6	36217.4		60-64	0.00018447	0.00011532		60-64	0.151881					60-64	0.0232423	0.0275076	0.0203301
	65-69	41838.7	17870.7	23968		65-69	0.000193835	9.89588e-05		65-69	0.139561					65-69	0.0347424	0.0398527	0.0309321
	70-74	28835.9	11117.4	17718.4		70-74	0.000173515	0.000116108		70-74	0.111953					70-74	0.0539728	0.0608818	0.0496276
	75-79	17443.3	6680.04	10763.2		75-79	0.000118784	1.93729e-05		75-79	0.0825107					75-79	0.0856074	0.0955986	0.0794065
	80+	12021.8	4566.83	7454.95		80+	0	0		80+	0.0506337					80+	0.180531	0.194451	0.172004
	Total	3.90009e+06	1.9264e+06	1.97368e+06		Total	0.000255655	0.000249971		Total	0.0351752					Total	0.0108514	0.0119219	0.00980658
	2038					2038				2038						2038
	0-4	724576	366621	357955		0-4	4.36955e-05	4.31051e-05		0-4	0.0059853					0-4	0.02509	0.0286114	0.0214833
	5-9	600046	302033	298013		5-9	0	0		5-9	0.00789777					5-9	0.00443948	0.0050479	0.00382285
	10-14	502745	252642	250103		10-14	0	0		10-14	0.00797133					10-14	0.00243338	0.00267621	0.00218735
	15-19	421005	211187	209818		15-19	0.000159283	0.000269297		15-19	0.0125229					15-19	0.00307246	0.00344874	0.00269371
	20-24	368423	183955	184468		20-24	0.000523151	0.000620804		20-24	0.0351636					20-24	0.00442904	0.00518805	0.00367215
	25-29	311912	154745	157167		25-29	0.000666276	0.000637486		25-29	0.0556697					25-29	0.0054622	0.00607717	0.00485671
	30-34	252839	124612	128227		30-34	0.000660141	0.000541264		30-34	0.0609809					30-34	0.0062566	0.00691106	0.00562061
	35-39	207616	101665	105951		35-39	0.00057071	0.000436167		35-39	0.0700841					35-39	0.00766656	0.008487	0.00687931
	40-44	170768	83183.4	87584.9		40-44	0.000448983	0.000351437		40-44	0.0740011					40-44	0.00892383	0.0100087	0.00789349
	45-49	131142	63642.3	67499.5		45-49	0.000331975	0.000282211		45-49	0.0861404					45-49	0.0103735	0.0119967	0.00884319
	50-54	95193.9	46403	48790.8		50-54	0.000242079	0.000217524		50-54	0.110017					50-54	0.0132893	0.0153207	0.0113573
	55-59	70509.6	30368.9	40140.8		55-59	0.000189285	0.000154727		55-59	0.139694					55-59	0.0165329	0.0194285	0.0143466
	60-64	61924.6	25035.3	36889.4		60-64	0.000175691	0.000108309		60-64	0.150599					60-64	0.0232684	0.027492	0.0203971
	65-69	43906.6	18580.7	25325.8		65-69	0.000178841	9.45999e-05		65-69	0.140661					65-69	0.0346584	0.0398517	0.0308554
	70-74	29600.3	11592.9	18007.6		70-74	0.000171231	0.000112148		70-74	0.116909					70-74	0.0540977	0.060824	0.0497569
	75-79	18044.7	6820.7	11224		75-79	0.000117592	1.87147e-05		75-79	0.0864038					75-79	0.0855668	0.0956734	0.0794251
	80+	12461	4686.83	7773.98		80+	0	0		80+	0.0530578					80+	0.180467	0.194462	0.172033
	Total	4.02271e+06	1.98777e+06	2.03494e+06		Total	0.000239496	0.00023465		Total	0.034515					Total	0.0108238	0.0118887	0.00978343
	2039					2039				2039						2039
	0-4	745407	377159	368248		0-4	4.00232e-05	3.98225e-05		0-4	0.0058442					0-4	0.0250785	0.0285992	0.0214725
	5-9	619006	311572	307433		5-9	0	0		5-9	0.0076357					5-9	0.00443645	0.00504578	0.00381951
	10-14	519565	261090	258475		10-14	0	0		10-14	0.00799121					10-14	0.00243066	0.00267293	0.00218523
	15-19	433914	217660	216254		15-19	0.000148984	0.000252879		15-19	0.0126184					15-19	0.00306292	0.00343862	0.00268479
	20-24	375660	187611	188048		20-24	0.000491159	0.000583079		20-24	0.0315351					20-24	0.00441079	0.00517004	0.00365331
	25-29	322071	159853	162219		25-29	0.000624242	0.000598534		25-29	0.0567348					25-29	0.00540246	0.00602358	0.00479039
	30-34	261736	129067	132668		30-34	0.000618922	0.000508198		30-34	0.0613996					30-34	0.00622123	0.00687892	0.00558139
	35-39	213542	104576	108965		35-39	0.000535085	0.000409336		35-39	0.0700927					35-39	0.00760917	0.00843965	0.0068138
	40-44	176654	86033.3	90620.2		40-44	0.000420666	0.000329294		40-44	0.073139					40-44	0.00885433	0.00995106	0.00781313
	45-49	137476	66592.4	70883.4		45-49	0.000312531	0.000264201		45-49	0.0815425					45-49	0.0102358	0.0118789	0.00869209
	50-54	100424	48854.2	51569.8		50-54	0.000226321	0.000203134		50-54	0.103059					50-54	0.0131531	0.0151716	0.0112409
	55-59	72779.8	32429.3	40350.3		55-59	0.000176317	0.000144371		55-59	0.132096					55-59	0.0164978	0.019217	0.0143125
	60-64	62422.4	25233.4	37189		60-64	0.000160557	0.000101277		60-64	0.148635					60-64	0.0232716	0.0274557	0.0204326
	65-69	46263.9	19245.3	27018.7		65-69	0.000165406	8.40144e-05		65-69	0.141293					65-69	0.0345811	0.0398414	0.0308343
	70-74	30338	12145.8	18192.5		70-74	0.000167317	0.000108041		70-74	0.121367					70-74	0.0542281	0.0608014	0.0498391
	75-79	18664.5	6959.73	11704.7		75-79	0.000116366	1.80503e-05		75-79	0.0903424					75-79	0.0855128	0.0957156	0.0794462
	80+	12915.1	4811.18	8103.88		80+	0	0		80+	0.0556785					80+	0.180438	0.194484	0.172098
	Total	4.14884e+06	2.05089e+06	2.09794e+06		Total	0.000224367	0.000220148		Total	0.0339065					Total	0.010798	0.0118581	0.00976161
	2040					2040				2040						2040
	0-4	766671	387917	378754		0-4	3.69206e-05	3.62963e-05		0-4	0.00572317					0-4	0.0250688	0.0285893	0.0214631
	5-9	638150	321204	316946		5-9	0	0		5-9	0.00736817					5-9	0.00443317	0.00504289	0.00381526
	10-14	536866	269779	267087		10-14	0	0		10-14	0.00795115					10-14	0.00242829	0.00267083	0.00218399
	15-19	448671	225062	223609		15-19	0.000139471	0.000237263		15-19	0.0127693					15-19	0.0030543	0.00343022	0.00267593
	20-24	382578	191092	191486		20-24	0.000460048	0.000546675		20-24	0.0283011					20-24	0.00439025	0.00514984	0.00363222
	25-29	331881	164791	167090		25-29	0.000585271	0.00056156		25-29	0.0561418					25-29	0.00536839	0.00599597	0.00474944
	30-34	270852	133633	137219		30-34	0.000580203	0.000477361		30-34	0.0635208					30-34	0.00618115	0.00684056	0.00553896
	35-39	219974	107757	112217		35-39	0.000501873	0.000384696		35-39	0.0702026					35-39	0.00755558	0.00839241	0.00675202
	40-44	182241	88730.5	93510.5		40-44	0.000393873	0.000309698		40-44	0.0727271					40-44	0.00879472	0.00990392	0.00774415
	45-49	143809	69577.4	74231.6		45-49	0.000292096	0.000248789		45-49	0.0778809					45-49	0.0101241	0.011781	0.00857109
	50-54	105949	51391.1	54558.3		50-54	0.000213409	0.000191828		50-54	0.0965259					50-54	0.013013	0.01504	0.0111036
	55-59	75755.5	34816.4	40938.9		55-59	0.000163997	0.000133823		55-59	0.124491					55-59	0.0164648	0.01905	0.0142662
	60-64	62601.1	25377.7	37223.5		60-64	0.000153045	9.41657e-05		60-64	0.145768					60-64	0.0232486	0.0273853	0.0204235
	65-69	48701.1	19865.7	28835.3		65-69	0.000153378	8.13456e-05		65-69	0.14146					65-69	0.0345292	0.0398197	0.0308844
	70-74	31162.1	12747.4	18414.5		70-74	0.000144033	9.35156e-05		70-74	0.125175					70-74	0.0543182	0.0608043	0.0498287
	75-79	19286.4	7118.16	12168.1		75-79	8.64215e-05	1.74059e-05		75-79	0.0945802					75-79	0.0854903	0.0956989	0.0795197
	80+	13382.9	4936.43	8446.48		80+	0	0		80+	0.0585661					80+	0.180414	0.19458	0.172136
	Total	4.27853e+06	2.1158e+06	2.16274e+06		Total	0.000210208	0.000206353		Total	0.033346					Total	0.0107743	0.0118303	0.00974115
	2041					2041				2041						2041
	0-4	788464	398942	389522		0-4	3.35817e-05	3.33272e-05		0-4	0.00561949					0-4	0.0250608	0.0285807	0.0214557
	5-9	657464	330922	326542		5-9	0	0		5-9	0.00711209					5-9	0.00443004	0.00504051	0.00381138
	10-14	554611	278691	275920		10-14	0	0		10-14	0.0078574					10-14	0.00242675	0.00266868	0.0021824
	15-19	463829	232665	231164		15-19	0.000131153	0.000222539		15-19	0.012906					15-19	0.0030471	0.00342253	0.00266923
	20-24	390690	195166	195524		20-24	0.000431742	0.000512366		20-24	0.0260309					20-24	0.00436777	0.00512687	0.00361006
	25-29	340962	169366	171596		25-29	0.000548443	0.000525691		25-29	0.054206					25-29	0.0053445	0.00597849	0.00471875
	30-34	280510	138466	142044		30-34	0.000543982	0.000446707		30-34	0.0660982					30-34	0.00614604	0.00680864	0.0055014
	35-39	226936	111209	115727		35-39	0.000471049	0.000360867		35-39	0.0703458					35-39	0.0075059	0.00834704	0.00669761
	40-44	187604	91323.2	96280.6		40-44	0.000369429	0.00029046		40-44	0.0726493					40-44	0.00874236	0.00986094	0.00768137
	45-49	150109	72573	77536		45-49	0.000272915	0.000231852		45-49	0.0751154					45-49	0.0100349	0.0117043	0.00847232
	50-54	111714	54007.5	57706.9		50-54	0.000200595	0.000177999		50-54	0.0905161					50-54	0.0128769	0.0149222	0.0109626
	55-59	79484.3	37534.9	41949.3		55-59	0.000156251	0.000127276		55-59	0.117232					55-59	0.0164404	0.0189308	0.0142077
	60-64	62592.6	25482.6	37110		60-64	0.000140088	8.68897e-05		60-64	0.141836					60-64	0.0231939	0.0272796	0.0203882
	65-69	50971.3	20450.5	30520.8		65-69	0.000145419	7.99499e-05		65-69	0.141283					65-69	0.0345134	0.0397979	0.0309785
	70-74	32214.7	13357.9	18856.6		70-74	0.000133652	8.87466e-05		70-74	0.128138					70-74	0.0543158	0.0608343	0.0496986
	75-79	19888	7321.9	12566.1		75-79	8.56567e-05	1.67979e-05		75-79	0.099093					75-79	0.0855382	0.0956106	0.0796694
	80+	13863.6	5059.33	8804.3		80+	0	0		80+	0.061589					80+	0.180395	0.19469	0.172181
	Total	4.41191e+06	2.18254e+06	2.22937e+06		Total	0.000196961	0.000193231		Total	0.0328295					Total	0.0107532	0.0118062	0.00972237
	2042					2042				2042						2042
	0-4	810860	410272	400588		0-4	3.07738e-05	3.04978e-05		0-4	0.0055339					0-4	0.0250567	0.0285765	0.0214517
	5-9	676970	340736	336234		5-9	0	0		5-9	0.00688871					5-9	0.00442691	0.00503791	0.00380772
	10-14	572740	287796	284944		10-14	0	0		10-14	0.00769927					10-14	0.00242495	0.00266676	0.00218008
	15-19	479444	240496	238948		15-19	0.000123276	0.000208601		15-19	0.0130175					15-19	0.00304238	0.00341812	0.00266421
	20-24	400067	199865	200202		20-24	0.000404647	0.000480136		20-24	0.0244466					20-24	0.00435103	0.00511064	0.0035927
	25-29	349018	173430	175588		25-29	0.000514757	0.00049287		25-29	0.0525325					25-29	0.0053271	0.00596698	0.00469508
	30-34	290645	143540	147105		30-34	0.00051063	0.000418892		30-34	0.067621					30-34	0.00610324	0.00676749	0.00545508
	35-39	234641	115038	119604		35-39	0.000441937	0.000337365		35-39	0.0704541					35-39	0.00745796	0.00830087	0.00664724
	40-44	192914	93895.5	99018.3		40-44	0.000346757	0.000271225		40-44	0.0727718					40-44	0.00869434	0.00982245	0.00762643
	45-49	156322	75543.4	80778.9		45-49	0.000256828	0.000217438		45-49	0.0731921					45-49	0.00996534	0.0116424	0.00839699
	50-54	117641	56697.8	60943.5		50-54	0.000188211	0.000167641		50-54	0.0850934					50-54	0.0127504	0.0148216	0.0108236
	55-59	84019.4	40588.7	43430.7		55-59	0.00014441	0.000120575		55-59	0.110485					55-59	0.0164224	0.0188731	0.0141279
	60-64	62544.2	25575.4	36969		60-64	0.000133582	8.4507e-05		60-64	0.136756					60-64	0.0231046	0.027131	0.0203238
	65-69	52882.7	20999	31883.7		65-69	0.000138408	7.23761e-05		65-69	0.140794					65-69	0.0345273	0.0397683	0.0310755
	70-74	33573.6	13946.3	19627.4		70-74	0.000138872	8.44689e-05		70-74	0.130125					70-74	0.0542337	0.0608672	0.0495202
	75-79	20462.3	7585.82	12876.6		75-79	8.48918e-05	1.62322e-05		75-79	0.103841					75-79	0.0856624	0.09551	0.0798598
	80+	14355.9	5178.97	9176.98		80+	0	0		80+	0.0646556					80+	0.180371	0.194813	0.17222
	Total	4.5491e+06	2.25118e+06	2.29792e+06		Total	0.000184638	0.000180949		Total	0.0323539					Total	0.0107349	0.0117857	0.00970537
	2043					2043				2043						2043
	0-4	833951	421955	411997		0-4	2.80975e-05	2.81673e-05		0-4	0.00546633					0-4	0.0250565	0.028577	0.0214508
	5-9	696706	350666	346040		5-9	0	0		5-9	0.00670589					5-9	0.00442456	0.00503585	0.00380511
	10-14	591181	297057	294124		10-14	0	0		10-14	0.0074822					10-14	0.00242289	0.00266539	0.00217798
	15-19	495558	248576	246981		15-19	0.000115805	0.000195387		15-19	0.0131291					15-19	0.00303856	0.0034142	0.00266049
	20-24	410942	205303	205639		20-24	0.000379412	0.000449842		20-24	0.0239542					20-24	0.00434308	0.00510418	0.00358322
	25-29	356679	177294	179386		25-29	0.000483964	0.000461993		25-29	0.0499108					25-29	0.00530211	0.00594633	0.00466541
	30-34	300760	148610	152150		30-34	0.000479964	0.000392677		30-34	0.0688905					30-34	0.00606432	0.00673058	0.00541356
	35-39	242809	119105	123703		35-39	0.000414967	0.000317095		35-39	0.0708932					35-39	0.00741539	0.00826088	0.00660133
	40-44	198322	96519.2	101802		40-44	0.000325252	0.000254524		40-44	0.0727129					40-44	0.0086483	0.00978081	0.00757456
	45-49	162295	78410.7	83884.5		45-49	0.000239616	0.000203377		45-49	0.0720176					45-49	0.0099102	0.0115935	0.00833677
	50-54	123647	59441.5	64205.9		50-54	0.000174662	0.000155956		50-54	0.0803366					50-54	0.0126384	0.0147321	0.0106971
	55-59	88612.3	42785.3	45827.1		55-59	0.000136476	0.000109913		55-59	0.103827					55-59	0.0163301	0.0187599	0.0140616
	60-64	64011.8	27154.6	36856.9		60-64	0.000127419	7.65382e-05		60-64	0.130348					60-64	0.0230959	0.0268416	0.0203364
	65-69	53678.3	21219.6	32458.5		65-69	0.000131821	6.50479e-05		65-69	0.139806					65-69	0.03462	0.0398162	0.0312233
	70-74	35251.5	14499.2	20752.3		70-74	0.000128124	8.07656e-05		70-74	0.131351					70-74	0.0541155	0.0608966	0.0493776
	75-79	20990.3	7913.37	13076.9		75-79	8.37382e-05	1.56775e-05		75-79	0.108612					75-79	0.0858391	0.095405	0.0800643
	80+	14865.3	5295.16	9570.15		80+	0	0		80+	0.0677708					80+	0.180312	0.19492	0.172229
	Total	4.69026e+06	2.3218e+06	2.36846e+06		Total	0.000173181	0.000169393		Total	0.0319167					Total	0.0107194	0.0117694	0.00969008
	2044					2044				2044						2044
	0-4	857850	434046	423804		0-4	2.58962e-05	2.5587e-05		0-4	0.00541478					0-4	0.0250604	0.0285816	0.0214537
	5-9	716755	360753	356002		5-9	0	0		5-9	0.00655761					5-9	0.0044227	0.00503472	0.00380251
	10-14	609868	306442	303426		10-14	0	0		10-14	0.00722997					10-14	0.00242088	0.00266421	0.00217573
	15-19	512169	256907	255262		15-19	0.000108699	0.000182827		15-19	0.0131883					15-19	0.00303557	0.00341145	0.00265727
	20-24	423622	211641	211981		20-24	0.00035666	0.000421404		20-24	0.0240679					20-24	0.00433588	0.00509948	0.0035735
	25-29	363760	180855	182905		25-29	0.000454785	0.000432696		25-29	0.0463861					25-29	0.00527714	0.00592544	0.00463609
	30-34	310679	153579	157101		30-34	0.000450826	0.000367822		30-34	0.0703228					30-34	0.00603231	0.00670166	0.00537798
	35-39	251444	123414	128031		35-39	0.000389631	0.000297124		35-39	0.0715371					35-39	0.00738132	0.00822954	0.00656368
	40-44	204049	99317	104732		40-44	0.000306021	0.000238522		40-44	0.0729597					40-44	0.0086072	0.00974437	0.00753056
	45-49	167950	81126.9	86822.9		45-49	0.000226351	0.000191132		45-49	0.0714411					45-49	0.00986796	0.0115583	0.00828846
	50-54	129686	62223.2	67462.5		50-54	0.000165598	0.000145996		50-54	0.0763065					50-54	0.0125419	0.0146591	0.0105892
	55-59	93514.7	45058.9	48455.8		55-59	0.000127577	0.000106051		55-59	0.0975725					55-59	0.01623	0.0186581	0.0139721
	60-64	66073.5	29020.8	37052.7		60-64	0.000116593	7.3638e-05		60-64	0.123499					60-64	0.0230803	0.0266146	0.0203121
	65-69	54100.3	21387.3	32713		65-69	0.000117631	6.4197e-05		65-69	0.138155					65-69	0.034675	0.0398261	0.0313073
	70-74	37160.6	15016.8	22143.9		70-74	0.000118557	7.77394e-05		70-74	0.132107					70-74	0.0540231	0.0609217	0.0493443
	75-79	21497.7	8292.04	13205.6		75-79	8.17528e-05	1.50997e-05		75-79	0.112917					75-79	0.0860308	0.0953547	0.0801762
	80+	15391.3	5413.16	9978.18		80+	0	0		80+	0.0711021					80+	0.180261	0.19499	0.172271
	Total	4.83557e+06	2.39449e+06	2.44108e+06		Total	0.000162599	0.000158584		Total	0.0315146					Total	0.0107073	0.0117576	0.00967685
	2045					2045				2045						2045
	0-4	882675	446606	436069		0-4	2.37941e-05	2.34726e-05		0-4	0.0053751					0-4	0.0250661	0.0285887	0.0214584
	5-9	737219	371050	366169		5-9	0	0		5-9	0.00643761					5-9	0.00442115	0.00503326	0.00380088
	10-14	628738	315918	312820		10-14	0	0		10-14	0.00697151					10-14	0.00241886	0.00266233	0.00217297
	15-19	529253	265475	263778		15-19	0.000101939	0.000171463		15-19	0.0131768					15-19	0.00303382	0.00340991	0.00265531
	20-24	438111	218886	219225		20-24	0.00033614	0.000395317		20-24	0.0242561					20-24	0.00433027	0.00509633	0.00356456
	25-29	370530	184246	186284		25-29	0.000427883	0.000405632		25-29	0.0432679					25-29	0.00525166	0.00590395	0.0046065
	30-34	320255	158382	161874		30-34	0.000424123	0.000345218		30-34	0.0699598					30-34	0.00600816	0.0066804	0.00535041
	35-39	260291	127828	132464		35-39	0.000367516	0.000277828		35-39	0.0739402					35-39	0.00735049	0.00820062	0.00653013
	40-44	210262	102372	107890		40-44	0.000288766	0.000224427		40-44	0.0732981					40-44	0.00856841	0.00970858	0.00748823
	45-49	173317	83696.8	89620.2		45-49	0.000212966	0.000178688		45-49	0.0712555					45-49	0.00983116	0.0115261	0.00824618
	50-54	135717	65035.4	70682		50-54	0.000155862	0.000137474		50-54	0.0731158					50-54	0.0124653	0.0145994	0.0105018
	55-59	98698.4	47411.2	51287.2		55-59	0.000121905	9.8575e-05		55-59	0.0916867					55-59	0.0161214	0.0185621	0.0138652
	60-64	68773.6	31173	37600.8		60-64	0.000111452	7.04515e-05		60-64	0.11661					60-64	0.0230703	0.0264635	0.020257
	65-69	54255.6	21513.3	32742.4		65-69	0.00011212	5.68712e-05		65-69	0.135643					65-69	0.0346793	0.0397867	0.0313235
	70-74	39127.5	15501	23626.5		70-74	0.000110044	6.69459e-05		70-74	0.132415					70-74	0.0539804	0.060925	0.0494242
	75-79	22071.4	8702.43	13369		75-79	7.90977e-05	1.45186e-05		75-79	0.116624					75-79	0.0861435	0.0953571	0.0801459
	80+	15921.7	5544.04	10377.7		80+	0	0		80+	0.0746201					80+	0.180279	0.194899	0.172469
	Total	4.98522e+06	2.46934e+06	2.51588e+06		Total	0.000152957	0.000148601		Total	0.0311448					Total	0.010698	0.0117502	0.00966523
	2046					2046				2046						2046
	0-4	908499	459672	448828		0-4	2.17873e-05	2.14547e-05		0-4	0.00534272					0-4	0.0250723	0.0285959	0.0214631
	5-9	758190	381601	376589		5-9	0	0		5-9	0.00634173					5-9	0.00441959	0.00503184	0.0037992
	10-14	647775	325478	322296		10-14	0	0		10-14	0.0067248					10-14	0.00241661	0.00266098	0.00216982
	15-19	546774	274261	272513		15-19	9.66143e-05	0.000161765		15-19	0.0131048					15-19	0.00303241	0.00340906	0.00265402
	20-24	452993	226327	226666		20-24	0.000317453	0.000371396		20-24	0.0244267					20-24	0.00432485	0.00509377	0.00355709
	25-29	378465	188214	190252		25-29	0.000404539	0.000382154		25-29	0.0411299					25-29	0.00522488	0.00588063	0.00457617
	30-34	329120	162831	166289		30-34	0.000400486	0.000324405		30-34	0.068194					30-34	0.00598622	0.0066615	0.00532499
	35-39	269665	132500	137165		35-39	0.000346588	0.000262144		35-39	0.0767859					35-39	0.00732488	0.00817959	0.00649925
	40-44	216981	105686	111295		40-44	0.000272033	0.000210794		40-44	0.0736659					40-44	0.00853196	0.00967172	0.00744966
	45-49	178467	86166.3	92301.1		45-49	0.000200794	0.000168999		45-49	0.071366					45-49	0.00979832	0.0114987	0.00820894
	50-54	141712	67855.5	73856.3		50-54	0.000145639	0.000130229		50-54	0.0707362					50-54	0.0124049	0.0145536	0.0104308
	55-59	104110	49836.5	54273.2		55-59	0.000116057	9.14633e-05		55-59	0.0862612					55-59	0.016013	0.0184807	0.013747
	60-64	72153	33612.4	38540.5		60-64	0.000106184	6.25334e-05		60-64	0.109989					60-64	0.023075	0.0263926	0.0201817
	65-69	54259.2	21611	32648.3		65-69	0.000107092	5.57481e-05		65-69	0.132118					65-69	0.0346302	0.0396823	0.0312861
	70-74	40951.9	15957.8	24994.3		70-74	0.000104345	6.5812e-05		70-74	0.132393					70-74	0.0539968	0.060919	0.0495768
	75-79	22818.4	9116.98	13701.2		75-79	7.3207e-05	1.3768e-05		75-79	0.119526					75-79	0.0861117	0.0954151	0.0799354
	80+	16440.7	5699.56	10741.3		80+	0	0		80+	0.0784811					80+	0.180399	0.19467	0.172807
	Total	5.13937e+06	2.54643e+06	2.59295e+06		Total	0.000144311	0.000139627		Total	0.0308049					Total	0.0106911	0.0117466	0.00965443
	2047					2047				2047						2047
	0-4	935346	473255	462092		0-4	1.98737e-05	1.95308e-05		0-4	0.00531487					0-4	0.025077	0.0286021	0.0214672
	5-9	779740	392444	387296		5-9	0	0		5-9	0.00626826					5-9	0.00441857	0.00503092	0.00379807
	10-14	667000	335133	331866		10-14	0	0		10-14	0.00650995					10-14	0.00241462	0.0026595	0.00216788
	15-19	564674	283238	281436		15-19	9.15361e-05	0.000152525		15-19	0.0129652					15-19	0.00303131	0.0034079	0.00265231
	20-24	468322	233990	234333		20-24	0.000301683	0.000351337		20-24	0.0245675					20-24	0.00432031	0.00509195	0.00355056
	25-29	387639	192790	194849		25-29	0.000383804	0.000361321		25-29	0.0396449					25-29	0.00520224	0.00586232	0.00454821
	30-34	336980	166780	170200		30-34	0.000380776	0.0003072		30-34	0.0666308					30-34	0.00596763	0.00664506	0.00530274
	35-39	279507	137408	142099		35-39	0.000329347	0.000247827		35-39	0.0786409					35-39	0.00729198	0.00814859	0.00646365
	40-44	224414	109360	115054		40-44	0.000258204	0.000198666		40-44	0.0740076					40-44	0.00849653	0.0096368	0.00741268
	45-49	183566	88616.1	94950.1		45-49	0.000191138	0.000158552		45-49	0.0716489					45-49	0.00976708	0.0114734	0.00817464
	50-54	147618	70649.4	76968.9		50-54	0.000139053	0.000122271		50-54	0.0691158					50-54	0.012358	0.0145168	0.0103788
	55-59	109674	52329.7	57344.2		55-59	0.000110237	8.75496e-05		55-59	0.0813595					55-59	0.0159096	0.0184039	0.0136335
	60-64	76258.3	36340.5	39917.8		60-64	0.000100934	5.9236e-05		60-64	0.103825					60-64	0.023095	0.0264065	0.0200803
	65-69	54239.1	21703.6	32535.4		65-69	0.000102121	5.42109e-05		65-69	0.12749					65-69	0.0345294	0.0395213	0.0311997
	70-74	42480.5	16386.1	26094.4		70-74	9.9334e-05	6.5005e-05		70-74	0.132064					70-74	0.0540507	0.0609195	0.0497444
	75-79	23794.5	9515.95	14278.5		75-79	6.75348e-05	1.31029e-05		75-79	0.121499					75-79	0.0859615	0.0954721	0.0796232
	80+	16944.6	5886.27	11058.3		80+	0	0		80+	0.0826035					80+	0.180565	0.194438	0.17318
	Total	5.2982e+06	2.62583e+06	2.67237e+06		Total	0.000136935	0.000131935		Total	0.0304929					Total	0.0106859	0.0117465	0.00964391
	2048					2048				2048						2048
	0-4	963240	487367	475873		0-4	1.80504e-05	1.80142e-05		0-4	0.00528957					0-4	0.0250814	0.028607	0.0214702
	5-9	801956	403622	398334		5-9	0	0		5-9	0.00621425					5-9	0.00441799	0.00503036	0.00379749
	10-14	686452	344902	341550		10-14	0	0		10-14	0.00633509					10-14	0.00241301	0.00265775	0.00216586
	15-19	582882	292368	290513		15-19	8.77386e-05	0.000145306		15-19	0.0127634					15-19	0.00303022	0.00340686	0.00265118
	20-24	484142	241898	242244		20-24	0.000288569	0.000334795		20-24	0.0247046					20-24	0.00431655	0.00509035	0.00354386
	25-29	398275	198086	200189		25-29	0.000367718	0.000343668		25-29	0.0392077					25-29	0.0051862	0.00585201	0.00452738
	30-34	344454	170534	173920		30-34	0.00036469	0.000292432		30-34	0.0641326					30-34	0.00594339	0.0066242	0.00527688
	35-39	289331	142312	147019		35-39	0.000315456	0.000235828		35-39	0.0802248					35-39	0.00726241	0.00812254	0.00642982
	40-44	232289	113262	119027		40-44	0.000247369	0.000189462		40-44	0.0746532					40-44	0.00846523	0.00960569	0.00738
	45-49	188758	91114.9	97642.9		45-49	0.000181996	0.00015173		45-49	0.0717614					45-49	0.00973469	0.0114412	0.00814228
	50-54	153292	73344.3	79947.6		50-54	0.000133633	0.000115486		50-54	0.0681785					50-54	0.0123239	0.0144901	0.0103367
	55-59	115311	54870.8	60439.9		55-59	0.000104999	8.39926e-05		55-59	0.0770527					55-59	0.0158173	0.0183411	0.013526
	60-64	80450.1	38318.5	42131.6		60-64	9.53728e-05	5.97757e-05		60-64	0.0977534					60-64	0.023016	0.0263159	0.0200147
	65-69	55507.4	23076.1	32431.5		65-69	9.74076e-05	5.23625e-05		65-69	0.121605					65-69	0.0345307	0.0391501	0.0312437
	70-74	43089.4	16550	26539.4		70-74	9.46069e-05	5.62336e-05		70-74	0.13126					70-74	0.0542377	0.0610392	0.0499962
	75-79	25002.5	9890.63	15111.8		75-79	6.23087e-05	1.25334e-05		75-79	0.122747					75-79	0.0857741	0.0955392	0.079371
	80+	17426.4	6103.61	11322.8		80+	0	0		80+	0.0868251					80+	0.180794	0.194197	0.173569
	Total	5.46186e+06	2.70762e+06	2.75424e+06		Total	0.000130898	0.000125483		Total	0.0302071					Total	0.0106825	0.0117495	0.00963362
	2049					2049				2049						2049
	0-4	992205	502021	490184		0-4	1.66167e-05	1.65675e-05		0-4	0.00526655					0-4	0.025086	0.0286126	0.0214739
	5-9	824946	415190	409756		5-9	0	0		5-9	0.00617381					5-9	0.0044177	0.00502992	0.00379736
	10-14	706211	354825	351385		10-14	0	0		10-14	0.00619424					10-14	0.00241172	0.00265699	0.00216404
	15-19	601332	301620	299711		15-19	8.4109e-05	0.000138419		15-19	0.0125269					15-19	0.00302919	0.00340573	0.00265025
	20-24	500448	250050	250398		20-24	0.000276035	0.000318402		20-24	0.0247886					20-24	0.00431282	0.00508823	0.00353776
	25-29	410674	204257	206417		25-29	0.000351502	0.000326766		25-29	0.0393815					25-29	0.00517086	0.00584203	0.00450671
	30-34	351361	173994	177366		30-34	0.000348354	0.00027809		30-34	0.0607295					30-34	0.00591839	0.00659978	0.00524996
	35-39	298963	147118	151846		35-39	0.000302138	0.00022439		35-39	0.0819298					35-39	0.00723822	0.00810119	0.00640211
	40-44	240614	117394	123220		40-44	0.000236491	0.00018028		40-44	0.0754871					40-44	0.00844052	0.00958259	0.00735393
	45-49	194252	93778.1	100474		45-49	0.000174709	0.000143697		45-49	0.0721623					45-49	0.00970572	0.011414	0.00811131
	50-54	158660	75895.4	82764.9		50-54	0.000127301	0.000109643		50-54	0.0677847					50-54	0.0122988	0.0144712	0.0103046
	55-59	120975	57445.7	63529.4		55-59	0.000100668	7.86285e-05		55-59	0.0734098					55-59	0.0157405	0.0182889	0.0134361
	60-64	84929	40365.7	44563.3		60-64	9.31882e-05	5.58071e-05		60-64	0.0920444					60-64	0.0229291	0.0262296	0.0199395
	65-69	57292.7	24687.1	32605.7		65-69	9.31802e-05	5.03697e-05		65-69	0.115318					65-69	0.0345178	0.0388716	0.0312213
	70-74	43409.2	16676.7	26732.5		70-74	9.00424e-05	5.54886e-05		70-74	0.129838					70-74	0.054356	0.0610972	0.0501438
	75-79	26371.9	10241.7	16130.4		75-79	5.7703e-05	1.20719e-05		75-79	0.123548					75-79	0.0856365	0.0955912	0.0793037
	80+	17905.9	6345.42	11560.6		80+	0	0		80+	0.0907648					80+	0.180964	0.194052	0.173777
	Total	5.63055e+06	2.79191e+06	2.83864e+06		Total	0.000125061	0.000119149		Total	0.0299456					Total	0.0106809	0.0117556	0.00962392
	2050					2050				2050						2050
	0-4	1.02226e+06	517226	505033		0-4	1.52498e-05	1.51885e-05		0-4	0.00524511					0-4	0.0250909	0.0286185	0.0214782
	5-9	848825	427205	421620		5-9	0	0		5-9	0.00614333					5-9	0.00441771	0.00503017	0.00379713
	10-14	726380	364955	361425		10-14	0	0		10-14	0.00608118					10-14	0.00241038	0.00265576	0.00216261
	15-19	619962	310963	308999		15-19	8.0153e-05	0.000130866		15-19	0.0122846					15-19	0.00302792	0.00340484	0.00264861
	20-24	517219	258434	258785		20-24	0.000262289	0.000300995		20-24	0.0247999					20-24	0.00430931	0.00508729	0.00353238
	25-29	424835	211309	213526		25-29	0.000334365	0.000309072		25-29	0.0396256					25-29	0.0051568	0.00583322	0.0044874
	30-34	357965	177289	180677		30-34	0.000331791	0.000262473		30-34	0.0577407					30-34	0.00589325	0.00657631	0.005223
	35-39	308260	151761	156499		35-39	0.000287356	0.000212493		35-39	0.081764					35-39	0.00721513	0.00808263	0.0063739
	40-44	249142	121627	127515		40-44	0.000225859	0.000170127		40-44	0.0781149					40-44	0.00842518	0.00956804	0.0073351
	45-49	200208	96684.1	103524		45-49	0.000166069	0.000135899		45-49	0.0726515					45-49	0.00967773	0.0113859	0.0080842
	50-54	163754	78308.2	85446.3		50-54	0.000119991	0.00010455		50-54	0.0677454					50-54	0.0122771	0.0144581	0.0102782
	55-59	126629	60047.1	66581.4		55-59	9.47536e-05	7.40394e-05		55-59	0.0705368					55-59	0.0156776	0.0182483	0.0133619
	60-64	89669.3	42483.6	47185.7		60-64	8.65591e-05	5.18671e-05		60-64	0.0866705					60-64	0.0228329	0.0261508	0.0198417
	65-69	59630	26532.7	33097.3		65-69	8.90667e-05	4.28294e-05		65-69	0.109001					65-69	0.0345115	0.0387091	0.031141
	70-74	43528.8	16776	26752.6		70-74	8.58169e-05	5.46047e-05		70-74	0.127578					70-74	0.0543856	0.0610812	0.0501873
	75-79	27774.2	10570.7	17203.5		75-79	5.36435e-05	1.17065e-05		75-79	0.123959					75-79	0.0855877	0.0956341	0.0794251
	80+	18432.5	6605.17	11827.3		80+	0	0		80+	0.0944266					80+	0.180957	0.193995	0.173676
	Total	5.80447e+06	2.87878e+06	2.9257e+06		Total	0.000118944	0.000112621		Total	0.0297066					Total	0.0106811	0.0117641	0.0096155

## Sheet: Manica, part 1
	Input	Data		Reference
	Percent circumcised in base year (2009), by 5-year age group	EIMC	0.0425785	Ministerio da Saude (MISAU), Instituto Nacional de Estatística (INE) e ICF International (ICFI) (2013). Moçambique Inquérito Demográfico e de Saúde 2011. Calverton, Maryland; 2013. (age >15 years)
		5-9	0.0476555
		10-14	0.0527325
		15-19	0.0578095
		20-24	0.0702656
		25-29	0.0839994
		30-34	0.0827218
		35-39	0.0827218
		40-44	0.0907065
		45-49	0.0907065
		50-54	0.0907065
		55-59	0.0907065
	VMMC effectiveness		0.6	Auvert B, Taljaard D, Lagarde E, Sobngwi-Tambekou J, Sitta R, et al. (2005) Randomized, controlled intervention trial of male circumcision for reduction of HIV infection risk: The ANRS 1265 trial. PLoS Med 2(11): e298.
				Gray RH, Kigozi G, Serwadda D, Makumbi F, Watya S, Nalugoda N et al. Male circumcision for HIV prevention n men in Rakai, Uganda: a randomized trial. Lancet 2007; 369: 767-66.
				Bailey RC, Moses S, Parker CB, Agot K, Maclean I, Krieger JN, et al. Male circumcision for HIV prevention in young men in Kisumu, Kenya: a randomized controlled trial. Lancet 2007; 369: 643-56.
	Ratio of infections averted among females to males		0.415824	Spectrum, Goals Model
	HIV incidence		See Part 2	Authors’ Calculations
				Spectrum, AIDS Impact Module and Goals module
	Discount rate		0.03	Authors’ assumption.

## Sheet: Manica, part 2
																Mortality rates
			Population by age and sex				Incidence			Prevalence			Total Births								Annual mortality on ART	0
		Total	Male	Female			Male	Female			Male			Male			Total	Male	Female		Non–AIDS mortality
	2000					2000				2000			2000	30766.3		2000					0–4	0.0419096
	0-4	239123	120521	118602		0-4	0.010005	0.00989584		0-4	0.0223713		2001	31434.9		0-4	0.0507174	0.0553429	0.046017		5–9	0.00757741
	5-9	185206	92717.3	92488.2		5-9	0	0		5-9	0.00678455		2002	32178.7		5-9	0.00916329	0.00965938	0.00866596		10–14	0.00389999
	10-14	145862	72904.4	72957.3		10-14	0	0		10-14	0.00184624		2003	32879.6		10-14	0.00448039	0.00459699	0.00436152		15–19	0.00468382
	15-19	113851	54607.5	59243.7		15-19	0.00959853	0.0166535		15-19	0.0348987		2004	33611.6		15-19	0.00544558	0.00520682	0.00566566		20–24	0.00830714
	20-24	103666	45596.2	58069.9		20-24	0.0316686	0.0387749		20-24	0.0938565		2005	34457.8		20-24	0.00798898	0.00828071	0.00775993		25–29	0.0132357
	25-29	92676.4	41997.4	50679		25-29	0.0405859	0.0398153		25-29	0.142703		2006	35317.1		25-29	0.0106679	0.0115077	0.00997185		30–34	0.0154483
	30-34	72250.9	33802.6	38448.2		30-34	0.040308	0.0338191		30-34	0.169816		2007	36264.4		30-34	0.0127365	0.0136396	0.0119426		35–39	0.0211122
	35-39	59465.8	26416.8	33049		35-39	0.0347424	0.0271919		35-39	0.17902		2008	37106.9		35-39	0.0160934	0.0180035	0.0145666		40–44	0.0219866
	40-44	47210.6	21887.3	25323.3		40-44	0.0271915	0.0218095		40-44	0.155681		2009	37986.6		40-44	0.0175605	0.0205178	0.0150045		45–49	0.0221717
	45-49	37477.1	17887.2	19590.1		45-49	0.0199762	0.0174057		45-49	0.118579		2010	38919.5		45-49	0.0188209	0.0227725	0.0152039		50–54	0.0225549
	50-54	29555.6	14261.2	15294.4		50-54	0.0145298	0.0132968		50-54	0.0816836		2011	39885.2		50-54	0.0211622	0.0245678	0.0179754		55–59	0.0246977
	55-59	23037.8	10973.8	12064.2		55-59	0.0113885	0.00946641		55-59	0.0658526		2012	40884.5		55-59	0.0244908	0.0278432	0.0214552		60–64	0.0310525
	60-64	18174.6	8765.68	9409.11		60-64	0.0103993	0.00662594		60-64	0.0486691		2013	41490.3		60-64	0.0322395	0.0364768	0.0283096		65–69	0.04295
	65-69	13767	6793.16	6973.81		65-69	0.0106243	0.00573252		65-69	0.0360197		2014	42225.4		65-69	0.045842	0.0503677	0.0414581		70–74	0.0651726
	70-74	9205.01	4691.64	4513.37		70-74	0.0103058	0.00684822		70-74	0.0345441		2015	42953.3		70-74	0.0704197	0.0762106	0.0644		75–79	0.101246
	75-79	4851.08	2636.31	2214.77		75-79	0.00687781	0.00168638		75-79	0.0295756		2016	43687.6		75-79	0.109183	0.117716	0.0990267		80–84	0.199417
	80+	4227.84	2356.08	1871.76		80+	0	0		80+	0.00789215		2017	44427.5		80+	0.216202	0.227781	0.201627
	Total	1.19961e+06	578816	620792		Total	0.0136892	0.0148975		Total	0.0595239		2018	45116.1		Total	0.0206945	0.0230839	0.0184666
	2001					2001				2001			2019	45721.4		2001
	0-4	245283	123630	121653		0-4	0.0105764	0.0104591		0-4	0.0254236		2020	46369.1		0-4	0.0498811	0.0544937	0.0451921
	5-9	192511	96399.9	96110.8		5-9	0	0		5-9	0.00836878		2021	47939.4		5-9	0.00894886	0.0094643	0.00843189
	10-14	152406	76144.3	76261.8		10-14	0	0		10-14	0.00259187		2022	49550.3		10-14	0.00438903	0.00452047	0.00425777
	15-19	118844	58300.9	60543.4		15-19	0.00941035	0.0166259		15-19	0.0374466		2023	51215.9		15-19	0.00541256	0.00514986	0.00566554
	20-24	102896	45349.1	57546.8		20-24	0.0311087	0.0387918		20-24	0.100905		2024	52931.8		20-24	0.00815852	0.00826546	0.00807425
	25-29	96257.1	42832.4	53424.7		25-29	0.039851	0.03984		25-29	0.155816		2025	54691.5		25-29	0.0112859	0.0118865	0.0108075
	30-34	74383.4	35151.2	39232.2		30-34	0.0396276	0.0338771		30-34	0.185993		2026	56507.3		30-34	0.0134616	0.014299	0.0127069
	35-39	61123.5	27004.1	34119.4		35-39	0.0341012	0.0272036		35-39	0.196692		2027	58395.2		35-39	0.0172523	0.0191515	0.0157442
	40-44	48625.8	22326.8	26298.8		40-44	0.0266909	0.0218232		40-44	0.171621		2028	60349.9		40-44	0.0186467	0.0217383	0.0160222
	45-49	38471.6	18159.7	20311.9		45-49	0.019602	0.0174194		45-49	0.131251		2029	62356.3		45-49	0.0198063	0.0239946	0.0160534
	50-54	30433	14670.3	15762.6		50-54	0.0142612	0.0133023		50-54	0.0902518		2030	64402.7		50-54	0.0219686	0.0254455	0.018733
	55-59	23561.2	11176	12385.2		55-59	0.0111882	0.00946554		55-59	0.0723939		2031	66485.4		55-59	0.0249706	0.0282885	0.0219767
	60-64	18503.8	8867.3	9636.3		h ju	0.0102318	0.00661592		60-64	0.0537351		2032	68602.9		60-64	0.0324334	0.0367148	0.0284943
	65-69	13984.1	6820.7	7163.54		65-69	0.0104417	0.00572035		65-69	0.0396537		2033	70741.5		65-69	0.0456931	0.0502897	0.0412915
	70-74	9493.45	4791.03	4702.24		70-74	0.0100923	0.00684713		70-74	0.037885		2034	72887.7		70-74	0.0699741	0.0758793	0.0639598
	75-79	5090.93	2679.08	2412.03		75-79	0.00683693	0.00164391		75-79	0.0324949		2035	75031.8		75-79	0.10824	0.116986	0.0985176
	80+	4035.72	2243	1792.72		80+	0	0		80+	0.00876106		2036	77198.5		80+	0.21437	0.226299	0.199447
	Total	1.2359e+06	596546	639358		Total	0.0134801	0.0148032		Total	0.0650636		2037	79412.8		Total	0.0206299	0.0229009	0.018511
	2002					2002				2002			2038	81674.6		2002
	0-4	251271	126665	124606		0-4	0.0107948	0.0106747		0-4	0.0282575		2039	83989.3		0-4	0.0492003	0.0536996	0.0446279
	5-9	199779	100060	99718.8		5-9	0	0		5-9	0.0101427		2040	86357.5		5-9	0.00876631	0.00927712	0.00825376
	10-14	159159	79505.1	79653.8		10-14	0	0		10-14	0.00350286		2041	88798.8		10-14	0.0043146	0.00444773	0.0041817
	15-19	124865	62507.2	62357.5		15-19	0.00839369	0.0150403		15-19	0.0392773		2042	91330.2		15-19	0.00538725	0.00511258	0.00566258
	20-24	102095	45069.1	57026		20-24	0.0278346	0.0351424		20-24	0.10555		2043	93963.6		20-24	0.00834484	0.00823711	0.00842998
	25-29	99045.6	43552.6	55493		25-29	0.0356422	0.0361102		25-29	0.166867		2044	96712.8		25-29	0.0119889	0.0122752	0.0117642
	30-34	77020.4	36386.5	40633.9		30-34	0.0354577	0.0307151		30-34	0.199661		2045	99579.7		30-34	0.014249	0.0149842	0.0135906
	35-39	62657.2	27748	34909.3		35-39	0.0304871	0.0246632		35-39	0.212193		2046	102559		35-39	0.0185338	0.0203705	0.0170787
	40-44	50001.1	22710.7	27290.3		40-44	0.0238747	0.0197949		40-44	0.18583		2047	105641		40-44	0.0198514	0.0230356	0.0171953
	45-49	39496.6	18440.8	21055.7		45-49	0.0175379	0.0157991		45-49	0.142714		2048	108839		45-49	0.0208906	0.0252987	0.01703
	50-54	31267.2	15014.5	16252.7		50-54	0.0127499	0.0120775		50-54	0.0978651		2049	112164		50-54	0.0228544	0.0263776	0.0195996
	55-59	24133.4	11425.3	12708.2		55-59	0.00999757	0.00857495		55-59	0.0780273		2050	115616		55-59	0.025534	0.0287943	0.0226162
	60-64	18838.2	8970.8	9867.59		60-64	0.00915177	0.006016		60-64	0.0582971					60-64	0.0326931	0.0369777	0.0287973
	65-69	14211.3	6860.73	7350.53		65-69	0.00933055	0.00520527		65-69	0.0427794					65-69	0.0456127	0.0502456	0.0412885
	70-74	9754	4869.56	4884.44		70-74	0.00906693	0.00620305		70-74	0.0406587					70-74	0.0696659	0.0756394	0.0637106
	75-79	5320.86	2731.43	2589.43		75-79	0.00611076	0.0015399		75-79	0.0350438					75-79	0.107517	0.116184	0.0983747
	80+	3916.48	2157.97	1758.51		80+	0	0		80+	0.00979167					80+	0.21203	0.224275	0.197004
	Total	1.27283e+06	614675	658155		Total	0.0122522	0.0134867		Total	0.0697104					Total	0.0206362	0.0227442	0.0186675
	2003					2003				2003						2003
	0-4	257291	129714	127577		0-4	0.0108422	0.010721		0-4	0.0306606					0-4	0.0483556	0.0528384	0.043799
	5-9	206799	103595	103204		5-9	0	0		5-9	0.0120832					5-9	0.00856304	0.00909104	0.00803303
	10-14	166072	82962.3	83109.9		10-14	0	0		10-14	0.0045718					10-14	0.00423594	0.00438199	0.00409014
	15-19	130637	65342.1	65294.4		15-19	0.00736635	0.01338		15-19	0.0394391					15-19	0.00533257	0.00504786	0.00561749
	20-24	103903	47223.1	56680.1		20-24	0.0245683	0.0313441		20-24	0.105962					20-24	0.00851081	0.00815844	0.00880439
	25-29	99732.9	43618.3	56114.5		25-29	0.0314543	0.0322331		25-29	0.174769					25-29	0.0127211	0.0126803	0.0127559
	30-34	80179.2	37468.6	42710.6		30-34	0.0312932	0.0274138		30-34	0.209556					30-34	0.0150575	0.0156747	0.014516
	35-39	64007.4	28665.1	35342.3		35-39	0.0269237	0.0220322		35-39	0.22409					35-39	0.0198588	0.0216047	0.0184427
	40-44	51348	23024.5	28323.5		40-44	0.0210901	0.0176906		40-44	0.197155					40-44	0.0210865	0.0243638	0.0184224
	45-49	40550.9	18741.2	21809.7		45-49	0.0154818	0.0141075		45-49	0.152073					45-49	0.0220055	0.0266367	0.0180258
	50-54	32047.3	15282.2	16764.9		50-54	0.0112586	0.010797		50-54	0.10388					50-54	0.0237287	0.0273371	0.0204396
	55-59	24761.1	11725.8	13035.3		55-59	0.00883797	0.00766263		55-59	0.082118					55-59	0.0260958	0.0292963	0.0232167
	60-64	19178.8	9072.77	10106.1		60-64	0.00809639	0.00536674		60-64	0.061904					60-64	0.032942	0.0372787	0.0290488
	65-69	14451.8	6915.82	7535.98		65-69	0.00826598	0.00463408		65-69	0.0450357					65-69	0.0455164	0.0502165	0.0412032
	70-74	9981.7	4923.45	5058.26		70-74	0.00797358	0.00557005		70-74	0.0425312					70-74	0.0692764	0.0753675	0.0633477
	75-79	5539.5	2793.36	2746.14		75-79	0.00533212	0.00132453		75-79	0.0369901					75-79	0.106733	0.115385	0.0978694
	80+	3865.67	2098.44	1767.06		80+	0	0		80+	0.0109757					80+	0.20955	0.222322	0.194404
	Total	1.31035e+06	633166	677180		Total	0.0110327	0.0121486		Total	0.0730235					Total	0.0206113	0.0225858	0.0187651
	2004					2004				2004						2004
	0-4	263567	132891	130676		0-4	0.0107755	0.0106557		0-4	0.0325401					0-4	0.0474099	0.0518726	0.0428716
	5-9	213453	106942	106511		5-9	0	0		5-9	0.0142182					5-9	0.00836502	0.00891045	0.00781738
	10-14	173106	86492.5	86613.1		10-14	0	0		10-14	0.00578504					10-14	0.00416167	0.00432182	0.00400175
	15-19	136642	68291.5	68350.2		15-19	0.00653676	0.01195		15-19	0.0384784					15-19	0.00524346	0.00497765	0.00550901
	20-24	106702	49848.5	56853.6		20-24	0.0219748	0.0281024		20-24	0.104666					20-24	0.00866276	0.00808226	0.00917172
	25-29	99631.6	43547.8	56083.7		25-29	0.0281246	0.0289224		25-29	0.179298					25-29	0.0133917	0.0130112	0.0136871
	30-34	83671.6	38397.5	45274.2		30-34	0.0279705	0.0245767		30-34	0.216075					30-34	0.0158316	0.0163024	0.015436
	35-39	65226	29719.8	35506.2		35-39	0.0241079	0.0197811		35-39	0.232426					35-39	0.0211192	0.0227434	0.0197597
	40-44	52671.1	23292.2	29378.8		40-44	0.0188721	0.0158918		40-44	0.205684					40-44	0.0222588	0.0255968	0.0196124
	45-49	41619.3	19053.3	22566.2		45-49	0.0138469	0.0126722		45-49	0.15932					45-49	0.0230437	0.0278706	0.0189681
	50-54	32786.4	15486.5	17299.7		50-54	0.0100708	0.00969998		50-54	0.108363					50-54	0.0244826	0.0281917	0.0211527
	55-59	25436.9	12064.9	13372.1		55-59	0.00790461	0.00687799		55-59	0.0847665					55-59	0.0265795	0.0297208	0.0237449
	60-64	19532.1	9178.49	10353.6		60-64	0.00722578	0.00483237		60-64	0.064506					60-64	0.0331257	0.037483	0.0292465
	65-69	14701.9	6982.2	7719.71		65-69	0.00737652	0.00417405		65-69	0.0465747					65-69	0.0453821	0.0501311	0.0410868
	70-74	10179.8	4958	5221.81		70-74	0.00714176	0.00500375		70-74	0.0435559					70-74	0.0688021	0.0750147	0.0629361
	75-79	5761.56	2867.78	2893.78		75-79	0.00476681	0.00120785		75-79	0.038167					75-79	0.105885	0.114598	0.097251
	80+	3862.08	2056.35	1805.73		80+	0	0		80+	0.0122279					80+	0.207353	0.220632	0.192231
	Total	1.34855e+06	652070	696479		Total	0.0100531	0.0110139		Total	0.0751424					Total	0.0205515	0.0223938	0.0188267
	2005					2005				2005						2005
	0-4	270301	136308	133994		0-4	0.010664	0.0105456		0-4	0.0337382					0-4	0.0463933	0.0508348	0.0418752
	5-9	219756	110099	109657		5-9	0	0		5-9	0.0164648					5-9	0.00817416	0.00873732	0.00760872
	10-14	180248	90085.1	90163.3		10-14	0	0		10-14	0.00713525					10-14	0.00409356	0.00426531	0.00392007
	15-19	142883	71364.6	71518.5		15-19	0.00582696	0.0107082		15-19	0.0362944					15-19	0.00513174	0.00490235	0.00535825
	20-24	110498	52950.4	57547.3		20-24	0.0197206	0.0252462		20-24	0.10128					20-24	0.00876154	0.00800618	0.00945357
	25-29	98991.9	43372	55619.8		25-29	0.0252367	0.0260028		25-29	0.179611					25-29	0.013893	0.0131902	0.0144411
	30-34	87145.1	39191	47954.3		30-34	0.0250709	0.0220619		30-34	0.218575					30-34	0.0164275	0.016745	0.0161716
	35-39	66526.3	30846.2	35680.1		35-39	0.0216553	0.0177919		35-39	0.236448					35-39	0.0221002	0.0235712	0.0208284
	40-44	53945.4	23580.7	30364.6		40-44	0.0169297	0.0142883		40-44	0.210875					40-44	0.0231537	0.026517	0.020542
	45-49	42692.6	19361.4	23331.2		45-49	0.0124388	0.0113963		45-49	0.164096					45-49	0.0237987	0.0287524	0.0196806
	50-54	33513.1	15652.2	17860.9		50-54	0.00903676	0.00871807		50-54	0.111144					50-54	0.0249063	0.0287457	0.0215513
	55-59	26139	12413.4	13725.6		55-59	0.00711398	0.00620463		55-59	0.0858253					55-59	0.0268146	0.0299338	0.024006
	60-64	19912.4	9302.52	10609.9		60-64	0.00649416	0.00434736		60-64	0.0659628					60-64	0.0331289	0.0374982	0.0292818
	65-69	14961.9	7057.3	7904.65		65-69	0.00664977	0.0037443		65-69	0.0472767					65-69	0.0451193	0.049937	0.0408181
	70-74	10361.5	4982.98	5378.51		70-74	0.00641128	0.00447753		70-74	0.0436344					70-74	0.0681901	0.074467	0.0623748
	75-79	5978.65	2945.1	3033.55		75-79	0.00428202	0.00110944		75-79	0.0385998					75-79	0.104988	0.113738	0.0964922
	80+	3898.18	2031.21	1866.97		80+	0	0		80+	0.0134196					80+	0.205214	0.218816	0.190415
	Total	1.38775e+06	671543	716209		Total	0.00920893	0.010033		Total	0.0758212					Total	0.0204087	0.0221279	0.0187968
	2006					2006				2006						2006
	0-4	277503	139971	137531		0-4	0.0115607	0.0114324		0-4	0.0340207					0-4	0.0453361	0.0496557	0.0409399
	5-9	225756	113107	112649		5-9	0	0		5-9	0.018627					5-9	0.00801071	0.00856848	0.00745066
	10-14	187448	93706.6	93741.5		10-14	0	0		10-14	0.00857301					10-14	0.00404129	0.00421548	0.00386534
	15-19	149352	74559.3	74792.3		15-19	0.0051882	0.00955587		15-19	0.0332616					15-19	0.00500227	0.00482308	0.0051809
	20-24	115308	56540.9	58766.7		20-24	0.0176103	0.0225364		20-24	0.0960302					20-24	0.00877736	0.00791533	0.00960965
	25-29	98091	43128.5	54962.3		25-29	0.0225383	0.0232246		25-29	0.1751					25-29	0.0141863	0.0131694	0.0149842
	30-34	90201.8	39882.7	50318.9		30-34	0.0223865	0.0196958		30-34	0.216553					30-34	0.0167528	0.0169265	0.0166152
	35-39	68179.6	31955.1	36224.5		35-39	0.0193959	0.0159077		35-39	0.235406					35-39	0.0226859	0.0239792	0.021545
	40-44	55146.1	23977.4	31168.7		40-44	0.015124	0.0127629		40-44	0.212016					40-44	0.0236672	0.0269773	0.0211153
	45-49	43762.2	19646.7	24115.6		45-49	0.0111153	0.0101841		45-49	0.165888					45-49	0.0241592	0.0291446	0.0200975
	50-54	34269.4	15815.6	18453.8		50-54	0.00807661	0.00779252		50-54	0.112064					50-54	0.0249257	0.0288598	0.0215541
	55-59	26841.1	12736.7	14104.3		55-59	0.00634727	0.00554879		55-59	0.0852297					55-59	0.0267505	0.0298321	0.0239678
	60-64	20337.2	9463.51	10873.7		60-64	0.00581869	0.00387443		60-64	0.0660519					60-64	0.0329164	0.0372399	0.0291536
	65-69	15232.3	7138.22	8094.03		65-69	0.00592342	0.00336184		65-69	0.0471816					65-69	0.0447454	0.0495626	0.0404971
	70-74	10543.4	5011.04	5532.31		70-74	0.00577075	0.00402632		70-74	0.0427816					70-74	0.0674845	0.0737428	0.0618158
	75-79	6183.78	3015.42	3168.36		75-79	0.00383673	0.000955559		75-79	0.0381585					75-79	0.10405	0.112788	0.0956803
	80+	3963.7	2022.14	1941.73		80+	0	0		80+	0.0144332					80+	0.203375	0.217005	0.189163
	Total	1.42812e+06	691678	736439		Total	0.00864886	0.00933099		Total	0.0749103					Total	0.0201679	0.0217471	0.0186849
	2007					2007				2007						2007	0	0	0
	0-4	285374	143972	141402		0-4	0.0114185	0.0112958		0-4	0.0334589					0-4	0.0435916	0.0478765	0.0392288
	5-9	231656	116068	115588		5-9	0	0		5-9	0.0207191					5-9	0.00779929	0.00837498	0.00722122
	10-14	194624	97309.5	97314.7		10-14	0	0		10-14	0.010151					10-14	0.00397051	0.00415785	0.00378143
	15-19	156038	77874.8	78163.4		15-19	0.00478382	0.008781		15-19	0.0301939					15-19	0.00484601	0.00474076	0.00495089
	20-24	121148	60628.8	60518.8		20-24	0.0161915	0.0206596		20-24	0.0901679					20-24	0.00862114	0.00778514	0.00945866
	25-29	97231.7	42880.8	54351.1		25-29	0.0207422	0.0213071		25-29	0.16786					25-29	0.0139545	0.0127707	0.0148884
	30-34	92586.8	40500.4	52086.2		30-34	0.0205983	0.0180617		30-34	0.212698					30-34	0.0163822	0.0165204	0.0162748
	35-39	70374.5	33000.2	37374.5		35-39	0.0178705	0.0145948		35-39	0.232322					35-39	0.0222943	0.0234531	0.0212711
	40-44	56306.3	24550.2	31756.1		40-44	0.0139172	0.0117069		40-44	0.211829					40-44	0.0232129	0.0263967	0.0207516
	45-49	44848.2	19914.6	24933.6		45-49	0.010231	0.00935514		45-49	0.167148					45-49	0.0235437	0.0284004	0.0196646
	50-54	35098.3	16009.6	19088.9		50-54	0.00742927	0.00714963		50-54	0.113079					50-54	0.0240544	0.0280506	0.0207026
	55-59	27538.4	13017	14521.4		55-59	0.00584567	0.00509089		55-59	0.0845658					55-59	0.0259738	0.0290979	0.0231733
	60-64	20823.6	9673.93	11149.7		60-64	0.00535228	0.00355174		60-64	0.0658769					60-64	0.032164	0.0364299	0.0284627
	65-69	15518.3	7225.13	8293.17		65-69	0.00547191	0.00307905		65-69	0.0471233					65-69	0.0439758	0.0488244	0.0397516
	70-74	10739.6	5051.24	5688.34		70-74	0.00527315	0.00368687		70-74	0.0417241					70-74	0.0664267	0.0727156	0.060812
	75-79	6375.04	3073.75	3301.29		75-79	0.00351985	0.000875791		75-79	0.0375114					75-79	0.102753	0.111593	0.0944706
	80+	4051.98	2027.61	2024.36		80+	0	0		80+	0.0154525					80+	0.201436	0.215069	0.18778
	Total	1.47033e+06	712777	757555		Total	0.00812824	0.00870866		Total	0.0733504					Total	0.0195342	0.0210367	0.0181203
	2008					2008				2008						2008
	0-4	293701	148204	145496		0-4	0.0119283	0.011801		0-4	0.032852					0-4	0.0419096	0.0461608	0.0375804
	5-9	237649	119074	118575		5-9	0	0		5-9	0.0226412					5-9	0.00757741	0.00817068	0.00698164
	10-14	201565	100794	100771		10-14	0	0		10-14	0.0118403					10-14	0.00389999	0.00410068	0.00369925
	15-19	162866	81273.1	81593		15-19	0.00437576	0.00802064		15-19	0.0274156					15-19	0.00468382	0.0046541	0.00471343
	20-24	126756	63386.2	63370.3		20-24	0.0147083	0.0187882		20-24	0.0825878					20-24	0.00830714	0.00757332	0.00904114
	25-29	98892.7	44959.9	53932.8		25-29	0.0188712	0.0194035		25-29	0.157939					25-29	0.0132357	0.0120242	0.0142457
	30-34	93122.8	40547.5	52575.3		30-34	0.0187365	0.0164416		30-34	0.207868					30-34	0.0154483	0.0156448	0.0152969
	35-39	73164.5	33962.9	39201.8		35-39	0.0162621	0.0132864		35-39	0.228189					35-39	0.0211122	0.0221838	0.0201836
	40-44	57416.1	25332.5	32083.6		40-44	0.0126709	0.010662		40-44	0.211157					40-44	0.0219866	0.0249602	0.0196387
	45-49	45995.3	20168.4	25826.9		45-49	0.00932127	0.00852432		45-49	0.168702					45-49	0.0221717	0.0267707	0.0185803
	50-54	36028.5	16260.4	19768		50-54	0.0067732	0.00650821		50-54	0.115063					50-54	0.0225549	0.0265132	0.019299
	55-59	28240.8	13254.4	14986.4		55-59	0.00531248	0.0046415		55-59	0.0845316					55-59	0.0246977	0.0278667	0.021895
	60-64	21387.1	9942.35	11444.8		60-64	0.00487634	0.00324349		60-64	0.0659284					60-64	0.0310525	0.0352399	0.0274149
	65-69	15825.2	7318.36	8506.84		65-69	0.00497102	0.00281469		65-69	0.0474697					65-69	0.04295	0.0478049	0.0387531
	70-74	10954.1	5106.5	5847.78		70-74	0.00481288	0.00334573		70-74	0.0409001					70-74	0.0651726	0.0714932	0.0596805
	75-79	6551.08	3119.26	3431.82		75-79	0.00320415	0.000796176		75-79	0.0368797					75-79	0.101246	0.11024	0.0930708
	80+	4163.35	2047.8	2115.55		80+	0	0		80+	0.0166598					80+	0.199417	0.213033	0.186317
	Total	1.51428e+06	734752	779527		Total	0.00773525	0.00823605		Total	0.0715949					Total	0.01872	0.0201861	0.0173378
	2009					2009				2009						2009
	0-4	302477	152666	149811		0-4	0.0108985	0.0107818		0-4	0.031853					0-4	0.0402388	0.0444363	0.0359614
	5-9	243959	122243	121716		5-9	0	0		5-9	0.0242912					5-9	0.00734566	0.00795053	0.00673818
	10-14	208155	104100	104055		10-14	0	0		10-14	0.0136418					10-14	0.00383078	0.00404277	0.00361868
	15-19	169798	84733.6	85064.5		15-19	0.00404385	0.00736678		15-19	0.025071					15-19	0.00453291	0.00457709	0.00449091
	20-24	132604	66242	66362.1		20-24	0.0134975	0.0171811		20-24	0.0746675					20-24	0.00796532	0.0073553	0.00857424
	25-29	101507	47479.6	54027.2		25-29	0.0173599	0.0177706		25-29	0.146766					25-29	0.0129218	0.0115518	0.0141258
	30-34	93020.6	40498.4	52522.1		30-34	0.0172402	0.0150578		30-34	0.201206					30-34	0.0149871	0.0151906	0.0148335
	35-39	76348.2	34826.1	41522.1		35-39	0.0149523	0.0121546		35-39	0.222311					35-39	0.020662	0.021629	0.0198551
	40-44	58504.5	26283.7	32220.8		40-44	0.0116744	0.0097675		40-44	0.208918					40-44	0.0215424	0.0243498	0.0192524
	45-49	47196.2	20419	26777.3		45-49	0.00858016	0.00781065		45-49	0.169226					45-49	0.0216329	0.026107	0.0182212
	50-54	37037.8	16558.1	20479.9		50-54	0.00622635	0.00596948		50-54	0.117079					50-54	0.0218155	0.0257989	0.0185948
	55-59	28955.9	13458.9	15497.2		55-59	0.00490295	0.00425013		55-59	0.0845899					55-59	0.0239814	0.0272146	0.0211843
	60-64	22019.1	10256.3	11762.8		60-64	0.00447837	0.00297284		60-64	0.0656572					60-64	0.0303788	0.0344948	0.02679
	65-69	16157.4	7422.04	8735.4		65-69	0.00456472	0.00257696		65-69	0.0478479					65-69	0.0422256	0.0471141	0.0380525
	70-74	11183.4	5173.22	6010.13		70-74	0.00445056	0.00308113		70-74	0.0399877					70-74	0.0641885	0.070505	0.0587515
	75-79	6714.29	3155.53	3558.93		75-79	0.00298001	0.000718808		75-79	0.0361577					75-79	0.0999312	0.109027	0.0918618
	80+	4297.47	2080.65	2216.83		80+	0	0		80+	0.0177151					80+	0.197611	0.211149	0.184905
	Total	1.55994e+06	757596	802340		Total	0.00712841	0.0075576		Total	0.0694193					Total	0.0181053	0.0195178	0.0167715
	2010					2010				2010						2010
	0-4	311535	157280	154255		0-4	0.0112883	0.0111642		0-4	0.0311648					0-4	0.038807	0.042887	0.034647
	5-9	250764	125676	125088		5-9	0	0		5-9	0.0256364					5-9	0.00712313	0.00771972	0.00652372
	10-14	214407	107225	107182		10-14	0	0		10-14	0.0155115					10-14	0.00376454	0.00397759	0.0035514
	15-19	176823	88248.9	88573.8		15-19	0.00432042	0.00698362		15-19	0.0234184					15-19	0.00441475	0.00451108	0.00431877
	20-24	138677	69205.1	69472.1		20-24	0.0143416	0.0162259		20-24	0.0669706					20-24	0.00765104	0.00713184	0.00816824
	25-29	105019	50425.2	54594		25-29	0.0184784	0.0167966		25-29	0.135032					25-29	0.0131136	0.0113825	0.0147124
	30-34	92422.5	40347	52075.6		30-34	0.0183511	0.0142358		30-34	0.192578					30-34	0.0151785	0.0153197	0.0150691
	35-39	79518.1	35563	43955		35-39	0.015877	0.0114677		35-39	0.214668					35-39	0.0210948	0.0219602	0.0203947
	40-44	59688.9	27308.8	32380.1		40-44	0.0124461	0.00924051		40-44	0.204517					40-44	0.0220322	0.0247826	0.0197125
	45-49	48370.2	20693.2	27677		45-49	0.00912857	0.007375		45-49	0.167787					45-49	0.0221194	0.0267035	0.0186921
	50-54	38079.2	16867.9	21211.2		50-54	0.00662009	0.00563991		50-54	0.118142					50-54	0.0219872	0.0261669	0.0186634
	55-59	29688.5	13642.3	16046.2		55-59	0.00520173	0.00401364		55-59	0.0842412					55-59	0.0239198	0.0272375	0.0210885
	60-64	22689.4	10585.4	12103.9		60-64	0.00476917	0.00281255		60-64	0.0647082					60-64	0.0301977	0.0342949	0.0266145
	65-69	16521.3	7545.38	8975.94		65-69	0.00485554	0.00244087		65-69	0.0478361					65-69	0.0418237	0.0467521	0.0376808
	70-74	11424.7	5248.67	6176.25		70-74	0.00471413	0.00288913		70-74	0.0389425					70-74	0.0634162	0.0697523	0.0580577
	75-79	6871.34	3187.86	3683.48		75-79	0.00317737	0.000702408		75-79	0.0350023					75-79	0.0987427	0.107814	0.0908922
	80+	4446.65	2121.36	2325.29		80+	0	0		80+	0.0183758					80+	0.195983	0.209435	0.183711
	Total	1.60695e+06	781170	825775		Total	0.00756015	0.00736564		Total	0.066952					Total	0.0177761	0.0190985	0.0165253
	2011					2011				2011						2011
	0-4	320892	162040	158852		0-4	0.00988194	0.00977431		0-4	0.0296425					0-4	0.0373305	0.0413896	0.033191
	5-9	258104	129381	128722		5-9	0	0		5-9	0.0264479					5-9	0.00690531	0.00751316	0.00629436
	10-14	220376	110210	110166		10-14	0	0		10-14	0.0172616					10-14	0.00370372	0.00392573	0.00348162
	15-19	183892	91787	92105.4		15-19	0.00392097	0.00650014		15-19	0.0222841					15-19	0.00431945	0.00446953	0.00416989
	20-24	144968	72273.7	72694.2		20-24	0.0129315	0.0150481		20-24	0.0596127					20-24	0.00729543	0.00692372	0.00766499
	25-29	109467	53814.4	55652.3		25-29	0.0166619	0.0155742		25-29	0.123091					25-29	0.012959	0.0110154	0.0148384
	30-34	91573.8	40127	51447		30-34	0.0165486	0.0132083		30-34	0.181701					30-34	0.01494	0.0149944	0.0148974
	35-39	82336.3	36213.1	46123.2		35-39	0.0143187	0.0106341		35-39	0.205452					35-39	0.0208153	0.0215613	0.020226
	40-44	61219.7	28332.7	32886.8		40-44	0.0112769	0.00857773		40-44	0.198028					40-44	0.0218054	0.024364	0.0196012
	45-49	49497.1	21069.9	28427.1		45-49	0.00823265	0.00684069		45-49	0.164813					45-49	0.0218992	0.0263722	0.0185839
	50-54	39138	17168.2	21969.8		50-54	0.0059789	0.00523806		50-54	0.118221					50-54	0.0216547	0.0259185	0.0183227
	55-59	30471.3	13834.2	16637.1		55-59	0.00470162	0.00372737		55-59	0.083662					55-59	0.0234625	0.0268843	0.0206172
	60-64	23374.5	10898.9	12475.7		60-64	0.00430637	0.00261286		60-64	0.0633075					60-64	0.0297297	0.033811	0.0261642
	65-69	16930.5	7702.95	9227.59		65-69	0.00441014	0.00226447		65-69	0.0474821					65-69	0.0412372	0.0461955	0.0370981
	70-74	11678.3	5329.41	6348.87		70-74	0.00425614	0.00270242		70-74	0.0378457					70-74	0.0625522	0.0689201	0.0572068
	75-79	7032.15	3223.45	3808.7		75-79	0.00287544	0.000630092		75-79	0.0335703					75-79	0.0974577	0.106624	0.0897004
	80+	4602.5	2164.13	2438.37		80+	0	0		80+	0.0187155					80+	0.194514	0.208063	0.182488
	Total	1.65555e+06	805570	849983		Total	0.00680468	0.00675733		Total	0.0639457					Total	0.0172845	0.0185529	0.0160824
	2012					2012				2012						2012
	0-4	330412	166881	163531		0-4	0.00702423	0.00694793		0-4	0.0258061					0-4	0.0354818	0.0395165	0.0313646
	5-9	266168	133454	132715		5-9	0	0		5-9	0.0266317					5-9	0.00666782	0.00728647	0.00604572
	10-14	226252	113153	113100		10-14	0	0		10-14	0.0189304					10-14	0.00363475	0.00386597	0.00340342
	15-19	190927	95302.1	95625.3		15-19	0.00366828	0.00612707		15-19	0.0216788					15-19	0.00424004	0.0044411	0.00404145
	20-24	151460	75447.3	76012.6		20-24	0.0120498	0.0141432		20-24	0.0531989					20-24	0.00691721	0.00671864	0.00711431
	25-29	114878	57657.3	57220.9		25-29	0.0155157	0.0146336		25-29	0.11184					25-29	0.0126151	0.010658	0.0145871
	30-34	90717.1	39885.6	50831.5		30-34	0.0154094	0.0124122		30-34	0.169486					30-34	0.0145681	0.0145962	0.0145461
	35-39	84541	36784.6	47756.4		35-39	0.0133252	0.00998578		35-39	0.195613					35-39	0.0203292	0.0211658	0.0196848
	40-44	63229.7	29293.8	33935.7		40-44	0.0105251	0.00805891		40-44	0.190325					40-44	0.0214099	0.0239326	0.0192323
	45-49	50580	21597.2	28982.8		45-49	0.00766437	0.00642515		45-49	0.161026					45-49	0.0215285	0.0260135	0.0181863
	50-54	40202.9	17446.9	22756.2		50-54	0.00557307	0.00491602		50-54	0.117536					50-54	0.0212129	0.025632	0.0178173
	55-59	31325.5	14054.9	17270.6		55-59	0.00438175	0.00350268		55-59	0.0831807					55-59	0.0229156	0.026523	0.0199798
	60-64	24061.2	11176.7	12884.6		60-64	0.00401129	0.00244219		60-64	0.0618651					60-64	0.0291798	0.0333226	0.0255862
	65-69	17393.6	7902.25	9491.39		65-69	0.00408732	0.00211492		65-69	0.046853					65-69	0.0406114	0.0455933	0.0364636
	70-74	11945.5	5414.78	6530.72		70-74	0.00398566	0.00251352		70-74	0.0369016					70-74	0.0616685	0.0681179	0.0562949
	75-79	7203.74	3267.24	3936.5		75-79	0.00265697	0.000615877		75-79	0.0321291					75-79	0.0961575	0.105404	0.0884833
	80+	4760.58	2206.05	2554.53		80+	0	0		80+	0.0187398					80+	0.193086	0.206747	0.181289
	Total	1.70606e+06	830924	875135		Total	0.00594056	0.00595445		Total	0.0603749					Total	0.0166688	0.0179259	0.0154752
	2013					2013				2013						2013
	0-4	339825	171677	168147		0-4	0.00455221	0.00450374		0-4	0.021298					0-4	0.0335435	0.0374468	0.0295583
	5-9	274670	137752	136918		5-9	0	0		5-9	0.026395					5-9	0.00643215	0.00704046	0.00581887
	10-14	232227	116146	116081		10-14	0	0		10-14	0.020308					10-14	0.00357807	0.00381052	0.00334696
	15-19	197729	98700.4	99028		15-19	0.00332446	0.00556913		15-19	0.0214047					15-19	0.00414611	0.00439392	0.00389912
	20-24	158109	78705.2	79404		20-24	0.0108818	0.0128258		20-24	0.0475978					20-24	0.00646508	0.0064927	0.00643771
	25-29	120164	60265.6	59898.6		25-29	0.0139863	0.0132635		25-29	0.100497					25-29	0.011438	0.00998098	0.0129068
	30-34	92214.7	41831.2	50383.6		30-34	0.0138949	0.0112571		30-34	0.155697					30-34	0.0133297	0.0135983	0.01311
	35-39	85092.7	36831.5	48261.2		35-39	0.0120176	0.00904824		35-39	0.185647					35-39	0.0184623	0.0198476	0.0174016
	40-44	65787.8	30176.7	35610.9		40-44	0.00948475	0.00729959		40-44	0.182219					40-44	0.0196464	0.022433	0.0172851
	45-49	51615.4	22303.9	29311.4		45-49	0.00691842	0.00582674		45-49	0.157243					45-49	0.019867	0.0245066	0.0163365
	50-54	41306	17698	23608		50-54	0.00502017	0.00446405		50-54	0.116456					50-54	0.0198264	0.0245046	0.0163266
	55-59	32262.5	14317.7	17944.9		55-59	0.00394603	0.00317088		55-59	0.0831177					55-59	0.0216826	0.0255941	0.0185618
	60-64	24751.4	11414.7	13336.7		60-64	0.00361349	0.00222436		60-64	0.0607243					60-64	0.0280759	0.0323731	0.0243981
	65-69	17920.6	8148.43	9772.13		65-69	0.00369853	0.00191595		65-69	0.0462027					65-69	0.03957	0.0446147	0.035381
	70-74	12229.5	5504.6	6724.9		70-74	0.00356732	0.00228618		70-74	0.0362683					70-74	0.0604323	0.0669443	0.0551019
	75-79	7388.68	3320.96	4067.72		75-79	0.00235524	0.00054524		75-79	0.030841					75-79	0.094538	0.103802	0.0869748
	80+	4921.91	2247.79	2674.12		80+	0	0		80+	0.018689					80+	0.191345	0.204962	0.179899
	Total	1.75821e+06	857043	901172		Total	0.00504412	0.00508865		Total	0.0566925					Total	0.0157165	0.017056	0.0144428
	2014					2014				2014						2014
	0-4	349166	176427	172739		0-4	0.00260987	0.00258243		0-4	0.0176172					0-4	0.0322919	0.0361381	0.0283636
	5-9	283612	142286	141326		5-9	0	0		5-9	0.0257918					5-9	0.00620401	0.00682213	0.0055817
	10-14	238507	119296	119211		10-14	0	0		10-14	0.0212933					10-14	0.00352187	0.00376153	0.00328203
	15-19	204192	101927	102264		15-19	0.00268072	0.00449684		15-19	0.0212791					15-19	0.00396795	0.00425146	0.00368706
	20-24	164898	82030.1	82868.2		20-24	0.00875486	0.010331		20-24	0.0424024					20-24	0.00588041	0.00621077	0.00555339
	25-29	125933	63028.8	62903.6		25-29	0.0112289	0.0106788		25-29	0.0902789					25-29	0.00900269	0.00843055	0.009576
	30-34	94755.9	44264.8	50490.9		30-34	0.0111584	0.00906699		30-34	0.143024					30-34	0.0104861	0.0107946	0.0102157
	35-39	85329.1	36898.6	48430.7		35-39	0.00965183	0.00728401		35-39	0.177911					35-39	0.0139462	0.015189	0.0129993
	40-44	68929.1	31074.9	37854.2		40-44	0.00761464	0.0058757		40-44	0.176954					40-44	0.0150579	0.0171821	0.0133141
	45-49	52773.9	23236	29537.9		45-49	0.00556409	0.00469681		45-49	0.156704					45-49	0.0156251	0.0190398	0.0129331
	50-54	42531.3	17982	24549.3		50-54	0.00403995	0.00359188		50-54	0.117833					50-54	0.0165803	0.0203691	0.0138051
	55-59	33308.5	14637.8	18670.6		55-59	0.00318093	0.0025549		55-59	0.0851069					55-59	0.0192298	0.0228022	0.0164292
	60-64	25478.8	11635	13843.8		60-64	0.00290597	0.00178272		60-64	0.0613113					60-64	0.0260188	0.0300838	0.0226146
	65-69	18518.1	8438.58	10079.7		65-69	0.0029598	0.00153979		65-69	0.0465118					65-69	0.0378681	0.0426347	0.033877
	70-74	12540.5	5605.53	6934.98		70-74	0.00289866	0.00184215		70-74	0.0365148					70-74	0.0587425	0.0651285	0.0535807
	75-79	7587.64	3383.92	4203.72		75-79	0.00191231	0.000425002		75-79	0.0303888					75-79	0.092555	0.101668	0.0852189
	80+	5089.91	2291.76	2798.15		80+	0	0		80+	0.0190958					80+	0.189365	0.202896	0.178283
	Total	1.81315e+06	884444	928706		Total	0.00388299	0.00392887		Total	0.0537204					Total	0.0143106	0.0156796	0.0130069
	2015					2015				2015						2015
	0-4	358440	181151	177289		0-4	0.00183149	0.00181277		0-4	0.0174795					0-4	0.0307877	0.0345241	0.0269709
	5-9	292778	146937	145842		5-9	0	0		5-9	0.0259677					5-9	0.00600102	0.00659807	0.00540066
	10-14	245279	122709	122570		10-14	0	0		10-14	0.0217436					10-14	0.00346509	0.00370433	0.00322559
	15-19	210325	104977	105348		15-19	0.00214449	0.00360317		15-19	0.0213923					15-19	0.00389129	0.00420942	0.00357428
	20-24	171777	85409	86367.6		20-24	0.00699154	0.00826107		20-24	0.0382882					20-24	0.00548659	0.00599109	0.0049857
	25-29	132063	65917.5	66145.3		25-29	0.00894771	0.00853722		25-29	0.0810268					25-29	0.00796817	0.00783272	0.00810058
	30-34	98297.9	47158.8	51139.1		30-34	0.00889286	0.00724649		30-34	0.13143					30-34	0.00947823	0.00986008	0.0091261
	35-39	85268.4	36934	48334.4		35-39	0.00769728	0.00583042		35-39	0.170341					35-39	0.0124514	0.0138867	0.0113546
	40-44	72279	31944.7	40334.3		40-44	0.0060551	0.0046865		40-44	0.172488					40-44	0.0136168	0.0157932	0.0118931
	45-49	54151.9	24304	29847.9		45-49	0.00444334	0.00375748		45-49	0.156192					45-49	0.0144882	0.0177596	0.0118301
	50-54	43825.8	18332.5	25493.3		50-54	0.00322693	0.00287801		50-54	0.119886					50-54	0.0156924	0.0194291	0.0130053
	55-59	34427.7	14990	19437.5		55-59	0.00252694	0.00204611		55-59	0.0877083					55-59	0.0184953	0.0221294	0.0157017
	60-64	26250.2	11848.7	14401.5		60-64	0.00231355	0.00143103		60-64	0.0625147					60-64	0.0252998	0.0294113	0.0219171
	65-69	19163.8	8748.57	10415.4		65-69	0.00237817	0.00124337		65-69	0.0470471					65-69	0.0371726	0.0419062	0.0331959
	70-74	12883.4	5724.95	7158.24		70-74	0.00230429	0.00148444		70-74	0.0370777					70-74	0.0578432	0.0641884	0.0527699
	75-79	7798.07	3453.72	4344.52		75-79	0.00156539	0.000362694		75-79	0.0301991					75-79	0.0913738	0.100456	0.0841504
	80+	5264.58	2338.46	2926.11		80+	0	0		80+	0.0194925					80+	0.187924	0.201405	0.17721
	Total	1.87027e+06	912879	957393		Total	0.00308293	0.00312137		Total	0.0518465					Total	0.0135628	0.0149528	0.0122373
	2016					2016				2016						2016
	0-4	367130	185592	181538		0-4	0.00167911	0.00166092		0-4	0.0166709					0-4	0.0293502	0.0329873	0.0256318
	5-9	302508	151870	150637		5-9	0	0		5-9	0.0257127					5-9	0.0056802	0.00626882	0.00508677
	10-14	252604	126404	126200		10-14	0	0		10-14	0.0220264					10-14	0.00337206	0.00360957	0.00313417
	15-19	216187	107895	108292		15-19	0.00163011	0.00272264		15-19	0.0216287					15-19	0.00377549	0.00411619	0.00343603
	20-24	178684	88811.9	89871.8		20-24	0.00530967	0.00623882		20-24	0.0351066					20-24	0.00517397	0.00578658	0.00456858
	25-29	138460	68915.9	69543.6		25-29	0.00678158	0.00644227		25-29	0.0729426					25-29	0.00705022	0.00719651	0.00690524
	30-34	102839	50511	52328.1		30-34	0.00674335	0.00546925		30-34	0.121422					30-34	0.00852235	0.00886361	0.00819621
	35-39	85028.7	36938.3	48090.5		35-39	0.00583244	0.00439998		35-39	0.163544					35-39	0.010897	0.0121761	0.00991452
	40-44	75454.9	32787.4	42667.5		40-44	0.00458968	0.00353868		40-44	0.16969					40-44	0.0120778	0.0139732	0.0106213
	45-49	55930.5	25418.9	30511.5		45-49	0.00338752	0.00283999		45-49	0.156573					45-49	0.0131863	0.0160182	0.0108271
	50-54	45143	18807.8	26335.2		50-54	0.00244034	0.00217283		50-54	0.123265					50-54	0.014757	0.0182013	0.0122972
	55-59	35593.1	15350	20243.1		55-59	0.00191714	0.00154781		55-59	0.0912147					55-59	0.0177071	0.0212315	0.0150346
	60-64	27085.9	12077.9	15007.8		60-64	0.00175328	0.0010737		60-64	0.0646476					60-64	0.0244939	0.0285415	0.0212482
	65-69	19835.3	9051.55	10783.9		65-69	0.00179571	0.000927931		65-69	0.0480924					65-69	0.0363627	0.0410138	0.0324582
	70-74	13268.3	5874.47	7393.81		70-74	0.00173027	0.00110797		70-74	0.038027					70-74	0.0567969	0.0630206	0.0518522
	75-79	8020.3	3528.48	4491.65		75-79	0.0011561	0.000251419		75-79	0.0304365					75-79	0.0900151	0.0989576	0.0829556
	80+	5447.97	2389.79	3058.19		80+	0	0		80+	0.0200706					80+	0.186277	0.199513	0.175934
	Total	1.92922e+06	942226	986994		Total	0.002426	0.00243571		Total	0.0501928					Total	0.0127957	0.0141447	0.0115079
	2017					2017				2017						2017
	0-4	374981	189600	185381		0-4	0.00141852	0.00140344		0-4	0.0161446					0-4	0.0282625	0.0318966	0.0245458
	5-9	312674	157027	155647		5-9	0	0		5-9	0.0250293					5-9	0.00539374	0.00597469	0.00480764
	10-14	260676	130477	130199		10-14	0	0		10-14	0.0219385					10-14	0.0032683	0.00351262	0.00302345
	15-19	221972	110780	111192		15-19	0.00138845	0.00231076		15-19	0.0219158					15-19	0.00364549	0.00399818	0.0032941
	20-24	185542	92195	93347.4		20-24	0.00452689	0.00529388		20-24	0.0326935					20-24	0.0049071	0.00559651	0.00422621
	25-29	145046	72020.5	73026.1		25-29	0.00577566	0.0054612		25-29	0.0658516					25-29	0.00629837	0.00661075	0.00599027
	30-34	108416	54335.5	54080.2		30-34	0.00574134	0.00464008		30-34	0.112737					30-34	0.00766109	0.00791859	0.00740237
	35-39	84804.1	36954.5	47849.6		35-39	0.00496898	0.00373236		35-39	0.157033					35-39	0.00946531	0.0103745	0.00875954
	40-44	78187.8	33612.5	44575.3		40-44	0.00390354	0.00299937		40-44	0.168173					40-44	0.010671	0.0121084	0.00958719
	45-49	58240.5	26531.8	31708.7		45-49	0.00288927	0.00240324		45-49	0.157634					45-49	0.0119319	0.0142244	0.0100137
	50-54	46480.5	19456.7	27023.8		50-54	0.00208814	0.00183866		50-54	0.127881					50-54	0.0139055	0.0169524	0.0117117
	55-59	36793.2	15709	21084.1		55-59	0.00162938	0.00130961		55-59	0.0953523					55-59	0.0169808	0.0203433	0.0144836
	60-64	28001.7	12340.9	15661		60-64	0.00149739	0.000917467		60-64	0.0676107					60-64	0.0237601	0.0277115	0.020646
	65-69	20520.3	9330.58	11189.9		65-69	0.00154074	0.000799047		65-69	0.0496505					65-69	0.0356241	0.0402274	0.0317851
	70-74	13701.8	6059.92	7641.87		70-74	0.00147345	0.000934042		70-74	0.0392722					70-74	0.0558365	0.0619671	0.0509749
	75-79	8254.84	3607.86	4647.16		75-79	0.000982546	0.000244511		75-79	0.0311158					75-79	0.0887424	0.0976813	0.0817994
	80+	5640.6	2445.73	3194.88		80+	0	0		80+	0.0207795					80+	0.184768	0.197957	0.174672
	Total	1.98993e+06	972486	1.01745e+06		Total	0.00208738	0.00208201		Total	0.0488305					Total	0.0121308	0.0134257	0.010893
	2018	0	0	0		2018				2018	0					2018
	0-4	382652	193516	189136		0-4	0.00128284	0.00126886		0-4	0.0154885					0-4	0.0271796	0.0307693	0.0235067
	5-9	322821	162179	160642		5-9	0	0		5-9	0.0239076					5-9	0.00511504	0.00569628	0.00452823
	10-14	269208	134787	134421		10-14	0	0		10-14	0.0217198					10-14	0.003159	0.00340539	0.00291066
	15-19	227861	113718	114142		15-19	0.00120548	0.00199585		15-19	0.0220301					15-19	0.00363387	0.00406488	0.00320446
	20-24	192157	95465.7	96691.4		20-24	0.00393114	0.00457302		20-24	0.0310489					20-24	0.00470969	0.0054442	0.0039845
	25-29	151709	75189.9	76519.1		25-29	0.0050073	0.00471033		25-29	0.0594895					25-29	0.00590786	0.0063594	0.00546418
	30-34	113912	56996.6	56915.3		30-34	0.00497793	0.00400557		30-34	0.103934					30-34	0.0072599	0.00756689	0.00695248
	35-39	86723.2	39024.9	47698.5		35-39	0.00430772	0.00322428		35-39	0.148832					35-39	0.00901518	0.00994687	0.00825287
	40-44	79361.1	33951.4	45409.7		40-44	0.00338841	0.00258531		40-44	0.166205					40-44	0.0102525	0.0117709	0.00911718
	45-49	61084.3	27591.2	33493.1		45-49	0.00251102	0.00207523		45-49	0.158012					45-49	0.011564	0.0139014	0.00963852
	50-54	47782.2	20287.1	27495.1		50-54	0.00179978	0.00158769		50-54	0.132444					50-54	0.0136627	0.0167055	0.0114176
	55-59	38034.2	16051.7	21982.5		55-59	0.00141581	0.00113447		55-59	0.0993444					55-59	0.0166606	0.0201008	0.0141407
	60-64	28992.4	12642.8	16349.4		60-64	0.00129272	0.000787203		60-64	0.0708908					60-64	0.0233553	0.0274015	0.0202162
	65-69	21211.9	9577.96	11634		65-69	0.00133188	0.000676231		65-69	0.0514113					65-69	0.0351077	0.0398135	0.0312335
	70-74	14187.1	6282.66	7904.48		70-74	0.00127378	0.000829942		70-74	0.0404932					70-74	0.0550839	0.0612134	0.0502121
	75-79	8501.88	3690.15	4811.73		75-79	0.000888057	0.000190782		75-79	0.0319685					75-79	0.0876529	0.0967084	0.0807438
	80+	5842.31	2506.8	3335.67		80+	0	0		80+	0.0214248					80+	0.183367	0.196479	0.173505
	Total	2.05204e+06	1.00346e+06	1.04858e+06		Total	0.00184001	0.00182194		Total	0.0474112					Total	0.0116793	0.0129786	0.0104358
	2019	0	0	0		2019				2019	0					2019
	0-4	389954	197254	192700		0-4	0.00105949	0.00104948		0-4	0.0138035					0-4	0.0259573	0.0294447	0.0223866
	5-9	332852	167271	165581		5-9	0	0		5-9	0.022949					5-9	0.00484371	0.00540426	0.00427744
	10-14	278243	139363	138880		10-14	0	0		10-14	0.0217749					10-14	0.00304536	0.00328744	0.00280244
	15-19	234067	116820	117246		15-19	0.00102457	0.00169272		15-19	0.0221397					15-19	0.00358065	0.00401259	0.00315172
	20-24	198415	98564.6	99850		20-24	0.00334794	0.00388039		20-24	0.030172					20-24	0.00458358	0.00533205	0.00384475
	25-29	158377	78393.1	79984		25-29	0.00426201	0.00399168		25-29	0.0539537					25-29	0.0057369	0.00624358	0.00524031
	30-34	119690	59734	59956.4		30-34	0.00423834	0.0033993		30-34	0.0955023					30-34	0.00715668	0.00748647	0.00682811
	35-39	89393.1	41466.2	47926.9		35-39	0.00366148	0.00273735		35-39	0.139691					35-39	0.00911528	0.0100461	0.00830992
	40-44	79938.8	34176.5	45762.4		40-44	0.00288399	0.00219762		40-44	0.16318					40-44	0.0103817	0.0120337	0.00914783
	45-49	64294.3	28565.4	35728.7		45-49	0.00212857	0.00175939		45-49	0.157527					45-49	0.0116998	0.0142059	0.0096914
	50-54	49056.2	21257.8	27798.4		50-54	0.00154171	0.00134204		50-54	0.135974					50-54	0.0137856	0.0169003	0.0113976
	55-59	39314.5	16387.5	22927		55-59	0.00119897	0.000963258		55-59	0.103029					55-59	0.0165706	0.0201378	0.0140208
	60-64	30038.3	12975.2	17063.1		60-64	0.00110768	0.000675744		60-64	0.0742329					60-64	0.023123	0.0272929	0.0199621
	65-69	21915.7	9799.68	12115.9		65-69	0.00113159	0.000576716		65-69	0.0532552					65-69	0.034675	0.0394714	0.030796
	70-74	14719.5	6535	8184.53		70-74	0.00108254	0.00069825		70-74	0.0415787					70-74	0.0544049	0.060499	0.0495391
	75-79	8764.48	3778.25	4986.23		75-79	0.000728418	0.000185608		75-79	0.0328334					75-79	0.0865882	0.0956305	0.0797708
	80+	6053.42	2572.67	3480.92		80+	0	0		80+	0.0219974					80+	0.181975	0.194906	0.17236
	Total	2.11509e+06	1.03491e+06	1.08017e+06		Total	0.0015751	0.00154979		Total	0.0458746					Total	0.0113162	0.0125838	0.0101016
	2020	0	0	0		2020				2020						2020
	0-4	397046	200871	196175		0-4	0.000953179	0.000943158		0-4	0.0108089					0-4	0.0250964	0.0285892	0.0215191
	5-9	342591	172221	170370		5-9	0	0		5-9	0.0214261					5-9	0.0046311	0.00519229	0.00406382
	10-14	287520	144061	143458		10-14	0	0		10-14	0.0221094					10-14	0.00290069	0.00314578	0.00265456
	15-19	240777	120191	120586		15-19	0.000860575	0.00141664		15-19	0.0220193					15-19	0.00352562	0.00394135	0.00311126
	20-24	204330	101486	102844		20-24	0.00281655	0.00325252		20-24	0.02942					20-24	0.00448856	0.00524597	0.00374281
	25-29	165035	81625.5	83410		25-29	0.00358113	0.00334514		25-29	0.0489275					25-29	0.00559149	0.0061158	0.00508044
	30-34	125702	62547.4	63154.4		30-34	0.00356108	0.00284927		30-34	0.0866855					30-34	0.0070145	0.00733026	0.00670448
	35-39	92869.7	44288.4	48581.3		35-39	0.0030801	0.00229491		35-39	0.129318					35-39	0.009113	0.00988493	0.00840928
	40-44	80063	34298.9	45764		40-44	0.00242242	0.00183937		40-44	0.157767					40-44	0.010404	0.0120108	0.00919986
	45-49	67590.1	29454.1	38135.8		45-49	0.00178369	0.00147318		45-49	0.155234					45-49	0.0116962	0.0141838	0.00977503
	50-54	50454.3	22316.6	28137.7		50-54	0.00129664	0.00112867		50-54	0.137494					50-54	0.0138139	0.0168651	0.011394
	55-59	40614.4	16762.5	23851.8		55-59	0.00102052	0.000802021		55-59	0.10588					55-59	0.0164404	0.0200343	0.0139147
	60-64	31126.4	13323.9	17802.5		60-64	0.000925363	0.000569048		60-64	0.0770559					60-64	0.0228753	0.0271051	0.0197096
	65-69	22647.1	10009.8	12637.5		65-69	0.000942922	0.00048239		65-69	0.0548041					65-69	0.034235	0.0391215	0.0303642
	70-74	15285.8	6799.66	8486.14		70-74	0.00090496	0.000571353		70-74	0.0422969					70-74	0.0537661	0.0598802	0.0488469
	75-79	9048.47	3878.16	5170.31		75-79	0.000641518	0.000135733		75-79	0.0334316					75-79	0.0855911	0.0946667	0.0787837
	80+	6273.76	2642.3	3631.47		80+	0	0		80+	0.0223293					80+	0.180683	0.193655	0.171244
	Total	2.17897e+06	1.06678e+06	1.1122e+06		Total	0.00134804	0.00131856		Total	0.0437763					Total	0.0110179	0.0122541	0.00983216
	2021	0	0	0		2021				2021						2021
	0-4	405383	205115	200269		0-4	0.000790204	0.000781484		0-4	0.0085185					0-4	0.0251576	0.0286558	0.0215747
	5-9	351612	176814	174798		5-9	0	0		5-9	0.0195746					5-9	0.00460863	0.0051687	0.0040421
	10-14	297315	149020	148296		10-14	0	0		10-14	0.0228296					10-14	0.00283159	0.00307096	0.00258989
	15-19	248038	123844	124194		15-19	0.000773986	0.00127088		15-19	0.0220822					15-19	0.0035638	0.00397153	0.00315723
	20-24	210004	104294	105710		20-24	0.00253329	0.00291939		20-24	0.0293817					20-24	0.00450171	0.00526387	0.00374976
	25-29	171694	84881.8	86812.7		25-29	0.00322187	0.00300002		25-29	0.0455514					25-29	0.00557391	0.00610087	0.0050567
	30-34	131919	65445.1	66473.5		30-34	0.0032022	0.00255866		30-34	0.0795831					30-34	0.00696405	0.00726971	0.00666312
	35-39	97224	47516.5	49707.5		35-39	0.00277052	0.00205821		35-39	0.120992					35-39	0.0091958	0.00980385	0.00861799
	40-44	79908.9	34343.5	45565.4		40-44	0.00217506	0.00165224		40-44	0.153226					40-44	0.0105204	0.01204	0.00937513
	45-49	70648.6	30278	40370.6		45-49	0.00160221	0.00132044		45-49	0.154565					45-49	0.0118171	0.0142555	0.00998398
	50-54	52169.5	23385.8	28783.5		50-54	0.00116666	0.00101894		50-54	0.139797					50-54	0.0139697	0.0169572	0.0115425
	55-59	41894	17231.8	24662.2		55-59	0.000908609	0.000716177		55-59	0.110199					55-59	0.016563	0.0201539	0.014054
	60-64	32230.9	13666	18564.8		60-64	0.000839901	0.000508561		60-64	0.0809192					60-64	0.0229672	0.0272527	0.0198126
	65-69	23417.5	10223.8	13193.5		65-69	0.000855969	0.000429777		65-69	0.057275					65-69	0.0342777	0.0392229	0.0304461
	70-74	15860.1	7051.65	8808.45		70-74	0.000840472	0.000529483		70-74	0.0436181					70-74	0.0538579	0.0600209	0.048924
	75-79	9352.99	3994.67	5358.5		75-79	0.000555896	0.000131982		75-79	0.0345401					75-79	0.085603	0.0946467	0.0788902
	80+	6497.19	2712.61	3784.41		80+	0	0		80+	0.0229778					80+	0.18071	0.193744	0.171376
	Total	2.24517e+06	1.09982e+06	1.14535e+06		Total	0.00120908	0.00117687		Total	0.0423192					Total	0.0110148	0.0122192	0.00985822
	2022					2022				2022						2022
	0-4	414991	209993	204999		0-4	0.000714634	0.000707371		0-4	0.00691315					0-4	0.0252735	0.0287893	0.0216728
	5-9	359686	180930	178755		5-9	0	0		5-9	0.0181642					5-9	0.00459412	0.00515889	0.00402248
	10-14	307524	154190	153333		10-14	0	0		10-14	0.0224514					10-14	0.00275428	0.00298683	0.00252042
	15-19	256053	127880	128173		15-19	0.000726637	0.00119191		15-19	0.0219131					15-19	0.00356984	0.00396924	0.00317134
	20-24	215613	107076	108537		20-24	0.00238163	0.00273894		20-24	0.0294958					20-24	0.00451709	0.00528367	0.00376084
	25-29	178300	88125.2	90175.1		25-29	0.00302783	0.00281478		25-29	0.0430878					25-29	0.00556793	0.00609763	0.00505028
	30-34	138282	68426.5	69855.3		30-34	0.00300932	0.0023981		30-34	0.0730694					30-34	0.00688607	0.00720299	0.00657564
	35-39	102516	51165.6	51350.2		35-39	0.00260314	0.00193238		35-39	0.113148					35-39	0.00922344	0.0097065	0.00874542
	40-44	79673.6	34350.4	45323.3		40-44	0.00204364	0.00155251		40-44	0.147365					40-44	0.0105751	0.0119927	0.00950069
	45-49	73216.1	31042.7	42173.4		45-49	0.00150834	0.00123415		45-49	0.153498					45-49	0.0118934	0.0142846	0.0101292
	50-54	54321	24410.6	29910.2		50-54	0.00110502	0.000953278		50-54	0.141065					50-54	0.0140589	0.0170093	0.0116511
	55-59	43147.5	17835	25312.5		55-59	0.000849821	0.000680901		55-59	0.114665					55-59	0.0166845	0.0202396	0.0141796
	60-64	33341.2	13992.8	19348.6		60-64	0.000793769	0.000478531		60-64	0.0847397					60-64	0.0230336	0.0273743	0.0198943
	65-69	24239.3	10456.4	13782.9		65-69	0.000797947	0.000418155		65-69	0.0599627					65-69	0.0343012	0.0392991	0.0304971
	70-74	16432.9	7277.99	9154.88		70-74	0.000781551	0.000488236		70-74	0.0450571					70-74	0.0539274	0.0601288	0.0489788
	75-79	9682.66	4131.7	5550.96		75-79	0.000534772	0.000128653		75-79	0.0356328					75-79	0.0856391	0.0946131	0.0789595
	80+	6724.21	2783.61	3940.61		80+	0	0		80+	0.0236542					80+	0.18074	0.193842	0.171486
	Total	2.31374e+06	1.13407e+06	1.17968e+06		Total	0.00113896	0.0011039		Total	0.0409286					Total	0.0110181	0.012198	0.00988376
	2023					2023				2023						2023
	0-4	426158	215649	210510		0-4	0.000577009	0.000572108		0-4	0.00642049					0-4	0.0253803	0.0289092	0.0217653
	5-9	367404	184867	182537		5-9	0	0		5-9	0.0159256					5-9	0.00456513	0.0051388	0.0039832
	10-14	317688	159345	158343		10-14	0	0		10-14	0.0218529					10-14	0.00267639	0.00289989	0.00245148
	15-19	264543	132165	132379		15-19	0.000678891	0.00111176		15-19	0.0219472					15-19	0.0035762	0.00396872	0.00318303
	20-24	221325	109910	111415		20-24	0.0022258	0.00255851		20-24	0.0293495					20-24	0.00453424	0.00530464	0.00377425
	25-29	184679	91270.2	93409		25-29	0.00283119	0.00262683		25-29	0.0414592					25-29	0.00557571	0.00610496	0.00505858
	30-34	144722	71472.5	73249.8		30-34	0.00281221	0.00223914		30-34	0.0672511					30-34	0.0067924	0.00713537	0.00645776
	35-39	107738	53708.5	54029.6		35-39	0.00243582	0.00180374		35-39	0.105256					35-39	0.00917332	0.00956865	0.00878035
	40-44	81433.7	36289.2	45144.7		40-44	0.00191422	0.00144719		40-44	0.139945					40-44	0.0106029	0.0118612	0.00958755
	45-49	74279.9	31336.5	42943.6		45-49	0.00140466	0.00115816		45-49	0.151835					45-49	0.0119395	0.0142872	0.0102224
	50-54	56946.5	25367.4	31578.9		50-54	0.00103154	0.000886915		50-54	0.141585					50-54	0.0140926	0.0170219	0.0117397
	55-59	44337.2	18589	25748.2		55-59	0.00080572	0.000636289		55-59	0.119048					55-59	0.016804	0.0203022	0.0142785
	60-64	34472.5	14296.1	20176.2		60-64	0.000727409	0.000448574		60-64	0.0884402					60-64	0.0230767	0.0274756	0.01996
	65-69	25112.2	10715.5	14396.5		65-69	0.000742997	0.000388722		65-69	0.0629148					65-69	0.0343216	0.0393869	0.0305519
	70-74	17001.9	7474.73	9527.15		70-74	0.000728026	0.000447957		70-74	0.0466425					70-74	0.053964	0.0602627	0.0490402
	75-79	10040.2	4290.8	5749.58		75-79	0.000514431	0.000125639		75-79	0.0367254					75-79	0.0856734	0.0945736	0.0790288
	80+	6955	2854.95	4100.05		80+	0	0		80+	0.0243588					80+	0.180745	0.193912	0.171576
	Total	2.38484e+06	1.1696e+06	1.21524e+06		Total	0.00105375	0.00101801		Total	0.039617					Total	0.0110213	0.0121812	0.00990495
	2024					2024				2024						2024
	0-4	439164	222228	216935		0-4	0.000515431	0.000510001		0-4	0.00632278					0-4	0.0253919	0.0289286	0.0217696
	5-9	374554	188508	186046		5-9	0	0		5-9	0.013013					5-9	0.00453508	0.00512212	0.00394026
	10-14	327676	164408	163268		10-14	0	0		10-14	0.0215298					10-14	0.0026089	0.00282306	0.00239325
	15-19	273508	136698	136810		15-19	0.000630252	0.00103617		15-19	0.0221326					15-19	0.00356845	0.00395849	0.00317872
	20-24	227380	112925	114455		20-24	0.00207349	0.00238331		20-24	0.029406					20-24	0.0045527	0.00532207	0.0037936
	25-29	190732	94259.2	96473		25-29	0.00263767	0.0024471		25-29	0.0405173					25-29	0.00558981	0.00612371	0.00506816
	30-34	151209	74569.7	76639.1		30-34	0.00261807	0.00208653		30-34	0.0622182					30-34	0.00669676	0.00707302	0.00632844
	35-39	113277	56341.9	56935.2		35-39	0.00227145	0.00168145		35-39	0.0977792					35-39	0.00906911	0.00942202	0.00871987
	40-44	83939.1	38604	45335.1		40-44	0.00178	0.00135304		40-44	0.131961					40-44	0.010588	0.011695	0.00964162
	45-49	74804.6	31538.9	43265.6		45-49	0.00131459	0.00107518		45-49	0.149488					45-49	0.0119358	0.0142443	0.0102531
	50-54	59934.4	26258.4	33676		50-54	0.000953678	0.000829639		50-54	0.141683					50-54	0.0140951	0.0170176	0.0118163
	55-59	45495	19469.7	26025.4		55-59	0.000739116	0.000592506		55-59	0.12283					55-59	0.0169141	0.0203416	0.0143499
	60-64	35634.5	14592.2	21042.2		60-64	0.000681234	0.000419313		60-64	0.0921209					60-64	0.023102	0.0275628	0.0200085
	65-69	26024.5	10996.9	15027.8		65-69	0.000690183	0.000360692		65-69	0.0660812					65-69	0.0343411	0.039468	0.0306004
	70-74	17574.3	7648.72	9925.76		70-74	0.000679506	0.000434817		70-74	0.0484107					70-74	0.0539878	0.0603458	0.0490701
	75-79	10423.1	4466.16	5956.93		75-79	0.000440348	8.18681e-05		75-79	0.0378096					75-79	0.0857269	0.0946143	0.0790638
	80+	7191.08	2928.17	4263.09		80+	0	0		80+	0.0251393					80+	0.180758	0.193971	0.171676
	Total	2.45852e+06	1.20644e+06	1.25208e+06		Total	0.000983185	0.000947259		Total	0.0383903					Total	0.0110134	0.012158	0.00991069
	2025					2025				2025						2025
	0-4	453996	229733	224264		0-4	0.000399223	0.000395208		0-4	0.00611544					0-4	0.0253774	0.0289123	0.0217563
	5-9	381386	191973	189413		5-9	0	0		5-9	0.010279					5-9	0.00450004	0.00509919	0.00389278
	10-14	337330	169309	168021		10-14	0	0		10-14	0.0205406					10-14	0.00258039	0.00278884	0.00237137
	15-19	282692	141343	141349		15-19	0.000584789	0.000961499		15-19	0.0231404					15-19	0.00344101	0.00382598	0.00305485
	20-24	233948	116215	117733		20-24	0.00192538	0.0022153		20-24	0.029425					20-24	0.00457186	0.00533923	0.00381584
	25-29	196481	97089.7	99391		25-29	0.00244941	0.00227419		25-29	0.0400067					25-29	0.00562479	0.00616192	0.00510009
	30-34	157721	77713.3	80007.4		30-34	0.00243222	0.00193665		30-34	0.0580735					30-34	0.00663612	0.00704447	0.00623948
	35-39	119099	59068.5	60030.5		35-39	0.00210878	0.00156412		35-39	0.0906479					35-39	0.00896478	0.00932306	0.00861509
	40-44	87247.1	41302.6	45944.5		40-44	0.00165247	0.00125676		40-44	0.12384					40-44	0.0105944	0.0115812	0.00970736
	45-49	74930.9	31663.9	43266.9		45-49	0.00121676	0.000998311		45-49	0.146176					45-49	0.0119454	0.0142205	0.0102804
	50-54	63025.9	27085.4	35940.5		50-54	0.000883385	0.000765032		50-54	0.141283					50-54	0.0141095	0.0170349	0.0119048
	55-59	46769.2	20432.3	26336.9		55-59	0.000700835	0.000550095		55-59	0.125878					55-59	0.0170239	0.020388	0.0144141
	60-64	36808.2	14922.6	21885.6		60-64	0.00063612	0.000378296		60-64	0.0959193					60-64	0.0231461	0.0276405	0.0200816
	65-69	26966.1	11289.3	15677.1		65-69	0.000638567	0.000333656		65-69	0.0694323					65-69	0.0343854	0.0395672	0.0306536
	70-74	18163.7	7811.24	10352.4		70-74	0.000635429	0.000397359		70-74	0.0503869					70-74	0.0539879	0.0604481	0.0491134
	75-79	10822.5	4646.3	6176.25		75-79	0.000424909	7.99845e-05		75-79	0.0388913					75-79	0.0857875	0.0946648	0.0791092
	80+	7436.24	3006.86	4429.37		80+	0	0		80+	0.0258961					80+	0.180735	0.193958	0.171759
	Total	2.53482e+06	1.2446e+06	1.29022e+06		Total	0.000902333	0.000867821		Total	0.0372066					Total	0.0110095	0.0121419	0.00991712
	2026					2026				2026						2026
	0-4	469236	237443	231793		0-4	0.000352094	0.000348569		0-4	0.00597683					0-4	0.025349	0.0288819	0.0217293
	5-9	389401	196026	193375		5-9	0	0		5-9	0.00823221					5-9	0.00447419	0.00508015	0.00385993
	10-14	346272	173853	172419		10-14	0	0		10-14	0.0187887					10-14	0.00256464	0.00277301	0.00235553
	15-19	292400	146251	146149		15-19	0.000542883	0.000892362		15-19	0.0244038					15-19	0.00333146	0.00371515	0.0029475
	20-24	241061	119783	121278		20-24	0.00178718	0.00205636		20-24	0.0293452					20-24	0.00459523	0.00535586	0.00384256
	25-29	201993	99808.3	102184		25-29	0.00227435	0.0021124		25-29	0.0397712					25-29	0.00567034	0.00621519	0.00513815
	30-34	164228	80878.7	83349.3		30-34	0.00225662	0.00179759		30-34	0.054783					30-34	0.00660652	0.00704163	0.00618431
	35-39	125154	61883.6	63270.7		35-39	0.00195909	0.00145222		35-39	0.0839481					35-39	0.00885637	0.00925004	0.00847132
	40-44	91410.8	44395	47015.6		40-44	0.00153279	0.00116438		40-44	0.115939					40-44	0.0106059	0.0114989	0.00976275
	45-49	74816.6	31728.6	43088.2		45-49	0.00113435	0.000932881		45-49	0.14171					45-49	0.0119476	0.0141915	0.0102953
	50-54	65911	27860.9	38050.1		50-54	0.000818546	0.000714672		50-54	0.140478					50-54	0.0141356	0.0170704	0.0119867
	55-59	48350.9	21410.2	26940.6		55-59	0.000652566	0.000513108		55-59	0.128024					55-59	0.0171039	0.0204396	0.0144593
	60-64	37964.2	15339.7	22624.7		60-64	0.000592194	0.00035243		60-64	0.0998583					60-64	0.0232164	0.0277143	0.0201667
	65-69	27924	11576.7	16347.5		65-69	0.000611183	0.000307376		65-69	0.0728689					65-69	0.0344312	0.0396932	0.0307045
	70-74	18786.2	7978.21	10807.8		70-74	0.000594963	0.000362054		70-74	0.0525547					70-74	0.0539746	0.0605125	0.0491492
	75-79	11227.7	4817.04	6410.63		75-79	0.000411096	7.80061e-05		75-79	0.040047					75-79	0.0858767	0.0948254	0.0791524
	80+	7694.22	3095.14	4598.91		80+	0	0		80+	0.0267709					80+	0.1807	0.193843	0.171825
	Total	2.61383e+06	1.28413e+06	1.3297e+06		Total	0.000837732	0.000804605		Total	0.0360924					Total	0.0110102	0.0121333	0.00992551
	2027					2027				2027						2027
	0-4	484947	245392	239555		0-4	0.000257968	0.000255876		0-4	0.00586539					0-4	0.0253255	0.0288576	0.0217072
	5-9	398655	200694	197961		5-9	0	0		5-9	0.00684177					5-9	0.00446174	0.00507366	0.00384136
	10-14	354250	177914	176336		10-14	0	0		10-14	0.0174045					10-14	0.00255711	0.00276837	0.00234396
	15-19	302541	151380	151160		15-19	0.000503421	0.000827942		15-19	0.0246349					15-19	0.00326163	0.00364464	0.00287807
	20-24	248925	123733	125192		20-24	0.00165815	0.00191231		20-24	0.029081					20-24	0.00461155	0.005366	0.00386589
	25-29	207445	102502	104943		25-29	0.00211098	0.00196238		25-29	0.0396606					25-29	0.0057118	0.00626715	0.00516937
	30-34	170672	84027.1	86645.2		30-34	0.00209326	0.00167138		30-34	0.0523121					30-34	0.00658961	0.00704858	0.00614453
	35-39	131374	64782.5	66591.5		35-39	0.00181688	0.00135076		35-39	0.0777876					35-39	0.00872617	0.0091715	0.00829037
	40-44	96484.8	47890.5	48594.3		40-44	0.00142762	0.0010837		40-44	0.108473					40-44	0.0105784	0.0114098	0.00975891
	45-49	74639.7	31765.9	42873.8		45-49	0.00104835	0.000862637		45-49	0.136047					45-49	0.0119049	0.0140995	0.0102789
	50-54	68345.1	28585.6	39759.5		50-54	0.00076095	0.000661654		50-54	0.139297					50-54	0.0141403	0.0170685	0.012035
	55-59	50349.2	22351.3	27997.9		55-59	0.000603727	0.000470426		55-59	0.129196					55-59	0.0171318	0.0204592	0.0144755
	60-64	39094.2	15877.6	23216.6		60-64	0.000549147	0.000328368		60-64	0.103966					60-64	0.0233024	0.0277559	0.0202567
	65-69	28888.4	11851.2	17037.3		65-69	0.000559706	0.00028139		65-69	0.0762683					65-69	0.0344603	0.0397985	0.0307467
	70-74	19451	8160.07	11291		70-74	0.000526292	0.000352239		70-74	0.0549193					70-74	0.0539592	0.0605686	0.0491826
	75-79	11632.8	4969.64	6663.14		75-79	0.00034906	7.59092e-05		75-79	0.0412736					75-79	0.0859303	0.0949775	0.0791825
	80+	7967.43	3194.88	4772.39		80+	0	0		80+	0.027614					80+	0.180666	0.193735	0.171924
	Total	2.69566e+06	1.32507e+06	1.37059e+06		Total	0.000767627	0.000736878		Total	0.035031					Total	0.011014	0.0121304	0.00993471
	2028					2028				2028						2028
	0-4	501166	253597	247569		0-4	0.000222593	0.00022014		0-4	0.00578209					0-4	0.025307	0.0288393	0.0216887
	5-9	409388	206096	203292		5-9	0	0		5-9	0.00646054					5-9	0.00446596	0.00508015	0.0038433
	10-14	361867	181791	180076		10-14	0	0		10-14	0.0152102					10-14	0.00254064	0.00275827	0.00232093
	15-19	312650	156500	156150		15-19	0.00046491	0.000768007		15-19	0.0246267					15-19	0.00320213	0.00358552	0.00281788
	20-24	257261	127929	129332		20-24	0.00153479	0.00177439		20-24	0.0290381					20-24	0.00462505	0.00537588	0.00388236
	25-29	212998	105246	107752		25-29	0.00195549	0.00182233		25-29	0.0392962					25-29	0.00574843	0.00631019	0.00519973
	30-34	176885	87074.1	89810.9		30-34	0.00193837	0.0015485		30-34	0.0505835					30-34	0.00658159	0.00706519	0.00611462
	35-39	137681	67744.1	69936.6		35-39	0.00168099	0.00125402		35-39	0.0722657					35-39	0.00858864	0.00909633	0.00809687
	40-44	101528	50349.6	51178.1		40-44	0.00132135	0.00100723		40-44	0.101012					40-44	0.0104809	0.0112875	0.00969076
	45-49	76341.4	33621.4	42720		45-49	0.000974616	0.000802648		45-49	0.129028					45-49	0.0118681	0.0139065	0.0102599
	50-54	69374.6	28876	40498.6		50-54	0.000707562	0.000610612		50-54	0.137582					50-54	0.0141376	0.0170509	0.0120604
	55-59	52796.8	23233	29563.8		55-59	0.000557114	0.000441014		55-59	0.129642					55-59	0.0171153	0.0204486	0.0144958
	60-64	40162.2	16549.4	23612.7		60-64	0.000504811	0.000305468		60-64	0.108004					60-64	0.0234069	0.027787	0.0203372
	65-69	29872.6	12106.3	17766.3		65-69	0.000508174	0.000271965		65-69	0.079596					65-69	0.0344703	0.0398785	0.0307755
	70-74	20156.4	8362.28	11794.1		70-74	0.000490932	0.000320146		70-74	0.0575283					70-74	0.0539467	0.0606178	0.0492167
	75-79	12036.3	5102.05	6934.29		75-79	0.000339967	7.37304e-05		75-79	0.0426675					75-79	0.0859628	0.0951279	0.0792194
	80+	8256.9	3305.91	4950.99		80+	0	0		80+	0.0284769					80+	0.180632	0.193593	0.171977
	Total	2.78042e+06	1.36748e+06	1.41294e+06		Total	0.000710041	0.000681798		Total	0.034019					Total	0.0110165	0.0121278	0.00994088
	2029					2029				2029						2029
	0-4	517885	262056	255829		0-4	0.000160208	0.000158605		0-4	0.00569426					0-4	0.0252901	0.0288218	0.0216725
	5-9	421893	212386	209507		5-9	0	0		5-9	0.00646425					5-9	0.00446578	0.0050795	0.00384362
	10-14	368919	185372	183547		10-14	0	0		10-14	0.0123052					10-14	0.00252035	0.00274836	0.00229008
	15-19	322578	161527	161051		15-19	0.000428423	0.000708499		15-19	0.0248175					15-19	0.00315927	0.00354383	0.00277356
	20-24	266067	132370	133697		20-24	0.00141391	0.00163758		20-24	0.0291649					20-24	0.0046385	0.00538551	0.00389891
	25-29	218890	108171	110719		25-29	0.00180186	0.00168226		25-29	0.0391416					25-29	0.00578284	0.00635151	0.00522725
	30-34	182774	89965.9	92808.7		30-34	0.00178626	0.00143146		30-34	0.0494675					30-34	0.00657918	0.00708911	0.00608486
	35-39	144034	70753.5	73280.6		35-39	0.00154855	0.0011567		35-39	0.0674692					35-39	0.00845684	0.00902617	0.00790948
	40-44	106893	52896.6	53996.4		40-44	0.00121813	0.000932178		40-44	0.0939345					40-44	0.0103502	0.011158	0.00955564
	45-49	78751.4	35834.1	42917.3		45-49	0.000895805	0.00074261		45-49	0.121495					45-49	0.0118156	0.0137162	0.0102247
	50-54	69905.1	29084.9	40820.2		50-54	0.000649024	0.000566939		50-54	0.135214					50-54	0.0141062	0.0169931	0.0120492
	55-59	55586.9	24056.3	31530.7		55-59	0.000515055	0.00040754		55-59	0.129673					55-59	0.0170779	0.0204315	0.0145193
	60-64	41199.8	17334.6	23865.3		60-64	0.000475491	0.000283058		60-64	0.111541					60-64	0.0235067	0.0278112	0.0203871
	65-69	30884.5	12355.9	18528.6		65-69	0.000480144	0.000246954		65-69	0.0829428					65-69	0.0344654	0.0399452	0.0308111
	70-74	20892.7	8581.6	12311.1		70-74	0.000456971	0.000289603		70-74	0.0603254					70-74	0.0539452	0.0606834	0.0492482
	75-79	12444.2	5219.41	7224.78		75-79	0.000284971	7.15596e-05		75-79	0.0442241					75-79	0.08595	0.0952506	0.0792309
	80+	8561.07	3424.98	5136.1		80+	0	0		80+	0.029323					80+	0.180648	0.193556	0.172041
	Total	2.86816e+06	1.41139e+06	1.45677e+06		Total	0.000647508	0.00062246		Total	0.0330565					Total	0.0110173	0.0121256	0.00994345
	2030					2030				2030						2030
	0-4	535085	270757	264327		0-4	0.000120975	0.00011968		0-4	0.00562807					0-4	0.0252701	0.0288009	0.0216527
	5-9	436191	219582	216609		5-9	0	0		5-9	0.00649164					5-9	0.00446059	0.00507277	0.00384
	10-14	375660	188781	186880		10-14	0	0		10-14	0.00962687					10-14	0.00249562	0.00273227	0.00225657
	15-19	332173	166392	165781		15-19	0.000392559	0.000652188		15-19	0.0240208					15-19	0.00315351	0.0035379	0.0027677
	20-24	275088	136920	138169		20-24	0.00129578	0.00150577		20-24	0.0303287					20-24	0.00462632	0.00537274	0.00388665
	25-29	225289	111365	113924		25-29	0.0016511	0.00154685		25-29	0.0389807					25-29	0.00580159	0.00637674	0.00524087
	30-34	188366	92702.4	95663.6		30-34	0.00163819	0.00131359		30-34	0.0487534					30-34	0.00657187	0.00710868	0.0060517
	35-39	150404	73804.1	76599.6		35-39	0.00141913	0.00106177		35-39	0.0635176					35-39	0.00833529	0.00895442	0.00773875
	40-44	112549	55533.9	57015.4		40-44	0.00111983	0.000854598		40-44	0.0872487					40-44	0.0101766	0.0110162	0.00935872
	45-49	81924.2	38409.5	43514.7		45-49	0.000821349	0.000682074		45-49	0.113892					45-49	0.011738	0.013518	0.0101669
	50-54	70067.6	29225.4	40842.2		50-54	0.000595259	0.000522951		50-54	0.132033					50-54	0.0140393	0.016888	0.0120008
	55-59	58476.8	24822.5	33654.1		55-59	0.000466291	0.000370241		55-59	0.129276					55-59	0.017021	0.0203866	0.0145386
	60-64	42345.5	18192.6	24152.8		60-64	0.000425496	0.000261417		60-64	0.114434					60-64	0.0235777	0.0278068	0.0203924
	65-69	31905.5	12635.8	19269.9		65-69	0.000430177	0.00022326		65-69	0.0864336					65-69	0.034467	0.039981	0.030851
	70-74	21651.6	8808.79	12842.6		70-74	0.000423794	0.000260273		70-74	0.0633468					70-74	0.0539507	0.0607497	0.049288
	75-79	12865.6	5329.93	7535.63		75-79	0.000279863	6.94816e-05		75-79	0.0459791					75-79	0.0859008	0.0952977	0.0792544
	80+	8876.71	3547.13	5329.59		80+	0	0		80+	0.0302424					80+	0.180662	0.193595	0.172054
	Total	2.95892e+06	1.45681e+06	1.50211e+06		Total	0.000590321	0.000568193		Total	0.0321502					Total	0.0110124	0.0121182	0.00994001
	2031					2031				2031						2031
	0-4	552728	279683	273045		0-4	0.000107166	0.000106622		0-4	0.00557278					0-4	0.0252465	0.0287773	0.0216299
	5-9	450882	226974	223908		5-9	0	0		5-9	0.00651408					5-9	0.00445602	0.00506659	0.00383709
	10-14	383558	192765	190793		10-14	0	0		10-14	0.00766052					10-14	0.00247011	0.00271218	0.00222553
	15-19	341057	170900	170156		15-19	0.000347496	0.000577883		15-19	0.0222952					15-19	0.00316065	0.00354568	0.00277394
	20-24	284633	141731	142902		20-24	0.00114235	0.00133043		20-24	0.0318008					20-24	0.00460522	0.00535211	0.00386445
	25-29	232222	114831	117391		25-29	0.00145643	0.0013657		25-29	0.03878					25-29	0.0058015	0.00638089	0.00523475
	30-34	193731	95331.7	98399.1		30-34	0.00144304	0.00116177		30-34	0.0483303					30-34	0.00654796	0.0071154	0.00599994
	35-39	156758	76871.9	79885.8		35-39	0.00125199	0.000937491		35-39	0.060415					35-39	0.00821351	0.00887303	0.00757887
	40-44	118444	58256.6	60187.7		40-44	0.000985609	0.000755347		40-44	0.0810725					40-44	0.00997051	0.0108508	0.00911843
	45-49	85911.1	41356	44555		45-49	0.000722191	0.000605194		45-49	0.106596					45-49	0.0116274	0.0133037	0.0100715
	50-54	70009	29313	40696		50-54	0.000529741	0.000464165		50-54	0.127922					50-54	0.0139337	0.0167267	0.011922
	55-59	61176.6	25542.9	35633.6		55-59	0.000413156	0.000325438		55-59	0.128599					55-59	0.0169549	0.020314	0.0145471
	60-64	43777.1	19065.1	24712		60-64	0.000378829	0.000227676		60-64	0.11658					60-64	0.0235922	0.0277905	0.0203532
	65-69	32907.1	12990.3	19916.9		65-69	0.00038642	0.000192383		65-69	0.0901404					65-69	0.0344889	0.03997	0.0309139
	70-74	22423.2	9031.54	13391.6		70-74	0.000374195	0.000242135		70-74	0.0664741					70-74	0.0539483	0.0608236	0.0493114
	75-79	13311.7	5444.04	7867.69		75-79	0.000263966	6.46171e-05		75-79	0.0479371					75-79	0.0858233	0.0953114	0.0792581
	80+	9200.05	3666.71	5533.34		80+	0	0		80+	0.0312234					80+	0.180709	0.193767	0.172057
	Total	3.05273e+06	1.50375e+06	1.54897e+06		Total	0.000521625	0.000503048		Total	0.0313026					Total	0.0109994	0.0121019	0.00992909
	2032					2032				2032						2032
	0-4	570754	288802	281952		0-4	9.9713e-05	9.84068e-05		0-4	0.00549289					0-4	0.0252264	0.028756	0.0216105
	5-9	466019	234590	231429		5-9	0	0		5-9	0.00652966					5-9	0.00445261	0.00506253	0.0038351
	10-14	392677	197354	195323		10-14	0	0		10-14	0.00631747					10-14	0.002455	0.00270112	0.00220632
	15-19	348957	174915	174042		15-19	0.000328711	0.000547337		15-19	0.0209016					15-19	0.00315626	0.00354058	0.00277001
	20-24	294625	146771	147854		20-24	0.00107772	0.00125778		20-24	0.0322765					20-24	0.00456517	0.00531402	0.0038218
	25-29	239898	118674	121224		25-29	0.00137508	0.00129305		25-29	0.0384827					25-29	0.00578489	0.00636599	0.0052146
	30-34	199042	97938.9	101103		30-34	0.00136297	0.00109936		30-34	0.0480729					30-34	0.00651849	0.00711114	0.0059427
	35-39	163040	79919.5	83120.4		35-39	0.00118133	0.000887004		35-39	0.0581135					35-39	0.0081111	0.0088044	0.00744449
	40-44	124505	61059.7	63445.4		40-44	0.00093236	0.000717359		40-44	0.0754877					40-44	0.00976546	0.0106917	0.00887134
	45-49	90767.4	44681.4	46086		45-49	0.000686693	0.000573456		45-49	0.0998012					45-49	0.0115048	0.0131061	0.00994855
	50-54	69894.2	29378.5	40515.7		50-54	0.000498335	0.000438638		50-54	0.122814					50-54	0.0138097	0.0165322	0.0118357
	55-59	63457.7	26217.8	37239.9		55-59	0.000393198	0.000313878		55-59	0.127659					55-59	0.0168954	0.0202283	0.014549
	60-64	45596.3	19906.1	25690.2		60-64	0.000350347	0.000216739		60-64	0.11787					60-64	0.0235476	0.0277594	0.0202841
	65-69	33880.8	13447.9	20432.8		65-69	0.000361722	0.000185881		65-69	0.0940597					65-69	0.034543	0.0399328	0.0309957
	70-74	23200.5	9244.02	13956.5		70-74	0.000342592	0.000215099		70-74	0.069628					70-74	0.0539399	0.0609061	0.0493258
	75-79	13788.4	5568.41	8219.94		75-79	0.000217489	6.28687e-05		75-79	0.0501214					75-79	0.0857476	0.0953332	0.0792541
	80+	9529.37	3780.65	5748.73		80+	0	0		80+	0.0322392					80+	0.180748	0.193945	0.172068
	Total	3.14963e+06	1.55225e+06	1.59738e+06		Total	0.000493166	0.000476433		Total	0.0305088					Total	0.0109818	0.0120803	0.00991425
	2033					2033				2033						2033
	0-4	589094	298080	291014		0-4	9.26309e-05	9.13006e-05		0-4	0.00539575					0-4	0.0252011	0.0287305	0.0215865
	5-9	481642	242451	239191		5-9	0	0		5-9	0.00656283					5-9	0.00445062	0.00505928	0.00383366
	10-14	403253	202666	200587		10-14	0	0		10-14	0.00593471					10-14	0.00245383	0.00270124	0.00220385
	15-19	356482	178739	177743		15-19	0.000310451	0.000517224		15-19	0.0187346					15-19	0.0031381	0.0035213	0.00275276
	20-24	304592	151803	152788		20-24	0.00101525	0.00118743		20-24	0.032554					20-24	0.00452194	0.00527309	0.00377677
	25-29	248039	122759	125280		25-29	0.00129421	0.00122225		25-29	0.0384497					25-29	0.00575986	0.00634648	0.00518505
	30-34	204454	100597	103857		30-34	0.00128305	0.00103857		30-34	0.047641					30-34	0.00648401	0.0070967	0.00589055
	35-39	169089	82866	86223.4		35-39	0.00111009	0.000837468		35-39	0.0565337					35-39	0.0080263	0.00874734	0.00733332
	40-44	130651	63922.2	66729.2		40-44	0.000878173	0.000676837		40-44	0.070568					40-44	0.00957449	0.0105475	0.00864244
	45-49	95624.9	47041.9	48583.2		45-49	0.000644344	0.000540299		45-49	0.0931538					45-49	0.0113247	0.0128921	0.00980693
	50-54	71524.7	31137.7	40387		50-54	0.000468867	0.000411406		50-54	0.116547					50-54	0.0137365	0.0162739	0.0117802
	55-59	64432.8	26495.3	37937.5		55-59	0.00036558	0.000295542		55-59	0.126315					55-59	0.0168601	0.0201585	0.014552
	60-64	47830.4	20695.4	27135		60-64	0.000336742	0.000207172		60-64	0.118513					60-64	0.0234742	0.0277174	0.0202381
	65-69	34795.2	14019.1	20776		65-69	0.000336059	0.000179553		65-69	0.0979846					65-69	0.0346333	0.0399043	0.0310766
	70-74	23995.2	9441.27	14554.1		70-74	0.000339251	0.000207845		70-74	0.072777					70-74	0.0539145	0.0609564	0.0493459
	75-79	14293	5706.81	8586.22		75-79	0.000215572	6.12214e-05		75-79	0.0525358					75-79	0.0857003	0.0953295	0.0792803
	80+	9865.37	3888.6	5976.77		80+	0	0		80+	0.0333895					80+	0.180765	0.194149	0.172057
	Total	3.24966e+06	1.60231e+06	1.64735e+06		Total	0.000465044	0.000450296		Total	0.0297706					Total	0.0109608	0.0120545	0.00989694
	2034					2034				2034						2034
	0-4	607681	307483	300198		0-4	8.52464e-05	8.45549e-05		0-4	0.00526083					0-4	0.0251757	0.0287037	0.0215621
	5-9	497747	250555	247192		5-9	0	0		5-9	0.00656022					5-9	0.00444822	0.00505611	0.00383207
	10-14	415581	208856	206725		10-14	0	0		10-14	0.00596869					10-14	0.00244978	0.00269654	0.00220048
	15-19	363442	182267	181175		15-19	0.000291435	0.000488427		15-19	0.0158534					15-19	0.00314108	0.00352354	0.00275631
	20-24	314371	156741	157631		20-24	0.000953119	0.00111918		20-24	0.0330225					20-24	0.00448304	0.00523578	0.00373454
	25-29	256647	127085	129562		25-29	0.00121595	0.00115216		25-29	0.0386181					25-29	0.00573133	0.0063243	0.00514969
	30-34	210198	103434	106764		30-34	0.00120604	0.000978367		30-34	0.0474715					30-34	0.00644193	0.00706909	0.00583432
	35-39	174822	85660.9	89161.6		35-39	0.0010439	0.000790318		35-39	0.0555571					35-39	0.00794216	0.00868761	0.00722597
	40-44	136840	66829.5	70011		40-44	0.000824045	0.000636637		40-44	0.0663828					40-44	0.00939399	0.0104009	0.00843036
	45-49	100801	49487	51314.4		45-49	0.000607024	0.000508979		45-49	0.0869404					45-49	0.0111216	0.0126735	0.009625
	50-54	73820.9	33230.3	40590.4		50-54	0.000442348	0.000389912		50-54	0.109903					50-54	0.0136522	0.0160213	0.0117127
	55-59	64947.1	26699.8	38247.2		55-59	0.000348034	0.000277148		55-59	0.12442					55-59	0.0168083	0.0200682	0.0145326
	60-64	50378.5	21433.6	28944.8		60-64	0.000311364	0.000190613		60-64	0.118798					60-64	0.0233906	0.0276727	0.0202198
	65-69	35681	14685.7	20995.3		65-69	0.000328575	0.000173012		65-69	0.101497					65-69	0.0347276	0.0398756	0.0311186
	70-74	24813.3	9635.1	15178.2		70-74	0.00030777	0.000200498		70-74	0.0759775					70-74	0.0538813	0.0609908	0.049357
	75-79	14818.6	5856.5	8962.08		75-79	0.000214032	5.96383e-05		75-79	0.0551722					75-79	0.0856625	0.0953758	0.0793151
	80+	10211.5	3993.13	6218.16		80+	0	0		80+	0.0346461					80+	0.180737	0.194293	0.172036
	Total	3.3528e+06	1.65393e+06	1.69887e+06		Total	0.000437423	0.000424536		Total	0.0290784					Total	0.0109373	0.0120254	0.00987795
	2035					2035				2035						2035
	0-4	626447	316976	309471		0-4	7.88871e-05	7.81562e-05		0-4	0.00509569					0-4	0.0251504	0.0286769	0.0215385
	5-9	514312	258890	255423		5-9	0	0		5-9	0.00651619					5-9	0.00444632	0.0050539	0.00383049
	10-14	429679	215938	213741		10-14	0	0		10-14	0.00603161					10-14	0.00244426	0.0026905	0.00219629
	15-19	370094	185624	184470		15-19	0.000273876	0.000460824		15-19	0.013245					15-19	0.00312808	0.00350866	0.00274512
	20-24	323817	161515	162302		20-24	0.000895334	0.00105428		20-24	0.0323738					20-24	0.00446427	0.00521977	0.00371243
	25-29	265468	131518	133950		25-29	0.0011417	0.00108422		25-29	0.0399757					25-29	0.00567364	0.00627112	0.00508701
	30-34	216439	106535	109904		30-34	0.00113304	0.000919973		30-34	0.047371					30-34	0.00639449	0.00703355	0.00577502
	35-39	180268	88306.9	91960.6		35-39	0.000978654	0.000742407		35-39	0.0549857					35-39	0.00786454	0.00863265	0.00712695
	40-44	143037	69774.6	73263		40-44	0.000772974	0.00059957		40-44	0.0630162					40-44	0.00923698	0.0102733	0.0082523
	45-49	106266	52018.9	54247.6		45-49	0.000572438	0.000481291		45-49	0.0811336					45-49	0.0109135	0.012471	0.0094231
	50-54	76834.4	35660.8	41173.6		50-54	0.000410982	0.000367378		50-54	0.103268					50-54	0.0135665	0.0157977	0.0116341
	55-59	65123.1	26843.8	38279.3		55-59	0.000323683	0.00025852		55-59	0.121795					55-59	0.0167418	0.0199541	0.0144891
	60-64	53016.8	22122.2	30894.6		60-64	0.00030009	0.000184491		60-64	0.11872					60-64	0.0233205	0.0276156	0.020245
	65-69	36663.2	15413.3	21249.9		65-69	0.000298504	0.000154534		65-69	0.10447					65-69	0.0347912	0.039869	0.0311162
	70-74	25636.7	9853.74	15782.9		70-74	0.000304761	0.000193336		70-74	0.0793784					70-74	0.0538658	0.0609917	0.049406
	75-79	15359.2	6010.99	9348.2		75-79	0.000212665	5.80609e-05		75-79	0.0580004					75-79	0.0856436	0.0954292	0.0793514
	80+	10571.1	4096.46	6474.61		80+	0	0		80+	0.0360297					80+	0.18069	0.194362	0.172039
	Total	3.45903e+06	1.7071e+06	1.75193e+06		Total	0.000410691	0.000399662		Total	0.0284321					Total	0.0109093	0.0119915	0.00985491
	2036					2036				2036						2036
	0-4	645377	326552	318825		0-4	7.22296e-05	7.20847e-05		0-4	0.00492474					0-4	0.0251255	0.0286501	0.0215161
	5-9	531303	267438	263864		5-9	0	0		5-9	0.00643376					5-9	0.00444452	0.00505164	0.00382854
	10-14	444163	223213	220950		10-14	0	0		10-14	0.00608692					10-14	0.00243966	0.00268482	0.00219199
	15-19	377888	189551	188337		15-19	0.000257623	0.000432455		15-19	0.0113851					15-19	0.00310295	0.00348201	0.00272144
	20-24	332561	165938	166622		20-24	0.00083957	0.000992021		20-24	0.0307351					20-24	0.00445236	0.0052095	0.00369832
	25-29	274810	136210	138600		25-29	0.00107087	0.00101959		25-29	0.0416907					25-29	0.00561212	0.00621715	0.00501753
	30-34	223201	109902	113298		30-34	0.00106228	0.000865274		30-34	0.0472812					30-34	0.00634795	0.00699396	0.0057213
	35-39	185495	90850.8	94643.8		35-39	0.00091701	0.000699082		35-39	0.0547062					35-39	0.00779417	0.008583	0.00703697
	40-44	149211	72733.5	76477.1		40-44	0.000722146	0.000562835		40-44	0.0604348					40-44	0.00910936	0.0101658	0.00810458
	45-49	111967	54632.1	57335.2		45-49	0.000534214	0.00045039		45-49	0.0758038					45-49	0.0107154	0.0122909	0.00921403
	50-54	80614.4	38435.4	42179		50-54	0.000385918	0.000343977		50-54	0.0969446					50-54	0.0134907	0.0156187	0.0115515
	55-59	65096.8	26942.2	38154.6		55-59	0.000301438	0.000246441		55-59	0.118302					55-59	0.0166618	0.0198178	0.0144334
	60-64	55480.2	22770.4	32709.7		60-64	0.000273564	0.000173068		60-64	0.11837					60-64	0.0232718	0.0275582	0.0202826
	65-69	37901.9	16153	21749.1		65-69	0.000277464	0.000146728		65-69	0.10675					65-69	0.0348006	0.0398543	0.0310391
	70-74	26440.1	10132.4	16307.6		70-74	0.000274559	0.0001696		70-74	0.0829998					70-74	0.0538919	0.0609519	0.0495054
	75-79	15908.9	6161.54	9747.33		75-79	0.000169064	5.64437e-05		75-79	0.0609658					75-79	0.085631	0.0954853	0.0793843
	80+	10948.8	4201.5	6747.31		80+	0	0		80+	0.03755					80+	0.180612	0.19443	0.172008
	Total	3.56837e+06	1.76182e+06	1.80655e+06		Total	0.000385063	0.000375649		Total	0.027832					Total	0.0108801	0.0119564	0.00983048
	2037					2037				2037						2037
	0-4	664497	336224	328273		0-4	6.71201e-05	6.63184e-05		0-4	0.00476987					0-4	0.0251054	0.0286278	0.0214977
	5-9	548661	276172	272489		5-9	0	0		5-9	0.00630129					5-9	0.00444204	0.00504984	0.00382602
	10-14	459085	230707	228378		10-14	0	0		10-14	0.00613049					10-14	0.00243601	0.00267991	0.00218961
	15-19	386894	194077	192817		15-19	0.000240572	0.000405576		15-19	0.0100999					15-19	0.00308201	0.00345987	0.00270258
	20-24	340325	169872	170453		20-24	0.000787336	0.000931518		20-24	0.0293734					20-24	0.00444478	0.00520368	0.00368847
	25-29	284605	141131	143474		25-29	0.00100282	0.000957661		25-29	0.0425198					25-29	0.00553498	0.00614582	0.00493532
	30-34	230687	113637	117050		30-34	0.000994231	0.00081298		30-34	0.0471464					30-34	0.00630064	0.00695077	0.00566946
	35-39	190672	93375.3	97296.5		35-39	0.00085979	0.000655114		35-39	0.0545979					35-39	0.0077288	0.00853783	0.00695237
	40-44	155306	75670.4	79635.2		40-44	0.000676969	0.000529313		40-44	0.0585854					40-44	0.00900742	0.0100788	0.00798727
	45-49	117829	57321.1	60507.6		45-49	0.000501279	0.000424647		45-49	0.0710055					45-49	0.0105337	0.0121322	0.00901933
	50-54	85214.3	41560.3	43654.1		50-54	0.000361494	0.000325894		50-54	0.091075					50-54	0.0134189	0.0154817	0.0114551
	55-59	65021.5	27022.9	37998.6		55-59	0.000287438	0.000232863		55-59	0.11387					55-59	0.0165654	0.0196509	0.0143666
	60-64	57560	23378.3	34181.7		60-64	0.000260358	0.00016276		60-64	0.117777					60-64	0.0232423	0.0275076	0.0203301
	65-69	39487	16866.2	22620.8		65-69	0.000273576	0.000139669		65-69	0.108223					65-69	0.0347424	0.0398527	0.0309321
	70-74	27215	10492.5	16722.5		70-74	0.000244896	0.000163872		70-74	0.0868143					70-74	0.0539728	0.0608818	0.0496276
	75-79	16462.8	6304.56	10158.3		75-79	0.00016765	2.73426e-05		75-79	0.0639833					75-79	0.0856074	0.0955986	0.0794065
	80+	11346	4310.13	7035.91		80+	0	0		80+	0.0392641					80+	0.180531	0.194451	0.172004
	Total	3.68087e+06	1.81812e+06	1.86275e+06		Total	0.000360827	0.000352805		Total	0.0272768					Total	0.0108514	0.0119219	0.00980658
	2038					2038				2038						2038
	0-4	683848	346013	337835		0-4	6.16711e-05	6.08377e-05		0-4	0.00464133					0-4	0.02509	0.0286114	0.0214833
	5-9	566318	285056	281262		5-9	0	0		5-9	0.00612436					5-9	0.00443948	0.0050479	0.00382285
	10-14	474486	238442	236045		10-14	0	0		10-14	0.00618141					10-14	0.00243338	0.00267621	0.00218735
	15-19	397340	199316	198024		15-19	0.000224809	0.000380081		15-19	0.00971095					15-19	0.00307246	0.00344874	0.00269371
	20-24	347714	173615	174099		20-24	0.000738365	0.000876191		20-24	0.0272678					20-24	0.00442904	0.00518805	0.00367215
	25-29	294379	146047	148333		25-29	0.000940369	0.000899736		25-29	0.0431693					25-29	0.0054622	0.00607717	0.00485671
	30-34	238627	117607	121020		30-34	0.000931711	0.000763929		30-34	0.047288					30-34	0.0062566	0.00691106	0.00562061
	35-39	195946	95950.3	99996		35-39	0.000805489	0.000615598		35-39	0.054347					35-39	0.00766656	0.008487	0.00687931
	40-44	161170	78507.8	82661.9		40-44	0.000633686	0.000496012		40-44	0.0573845					40-44	0.00892383	0.0100087	0.00789349
	45-49	123770	60065.1	63705.4		45-49	0.000468544	0.000398308		45-49	0.066798					45-49	0.0103735	0.0119967	0.00884319
	50-54	89843.2	43794.7	46048.3		50-54	0.000341666	0.000307009		50-54	0.0853133					50-54	0.0132893	0.0153207	0.0113573
	55-59	66546.3	28661.9	37884.5		55-59	0.000267153	0.000218379		55-59	0.108326					55-59	0.0165329	0.0194285	0.0143466
	60-64	58443.9	23628.1	34815.9		60-64	0.000247967	0.000152865		60-64	0.116782					60-64	0.0232684	0.027492	0.0203971
	65-69	41438.6	17536.3	23902.3		65-69	0.000252412	0.000133517		65-69	0.109077					65-69	0.0346584	0.0398517	0.0308554
	70-74	27936.5	10941.3	16995.4		70-74	0.000241672	0.000158284		70-74	0.0906578					70-74	0.0540977	0.060824	0.0497569
	75-79	17030.4	6437.31	10593.1		75-79	0.000165967	2.64135e-05		75-79	0.0670023					75-79	0.0855668	0.0956734	0.0794251
	80+	11760.6	4423.39	7337.01		80+	0	0		80+	0.0411439					80+	0.180467	0.194462	0.172033
	Total	3.7966e+06	1.87604e+06	1.92056e+06		Total	0.00033802	0.00033118		Total	0.0267648					Total	0.0108238	0.0118887	0.00978343
	2039					2039				2039						2039
	0-4	703508	355959	347549		0-4	5.6488e-05	5.62048e-05		0-4	0.00453191					0-4	0.0250785	0.0285992	0.0214725
	5-9	584212	294059	290153		5-9	0	0		5-9	0.00592114					5-9	0.00443645	0.00504578	0.00381951
	10-14	490361	246415	243946		10-14	0	0		10-14	0.00619682					10-14	0.00243066	0.00267293	0.00218523
	15-19	409524	205426	204099		15-19	0.000210274	0.000356909		15-19	0.00978499					15-19	0.00306292	0.00343862	0.00268479
	20-24	354544	177066	177478		20-24	0.000693213	0.000822946		20-24	0.0244541					20-24	0.00441079	0.00517004	0.00365331
	25-29	303968	150868	153100		25-29	0.000881044	0.00084476		25-29	0.0439953					25-29	0.00540246	0.00602358	0.00479039
	30-34	247024	121812	125211		30-34	0.000873535	0.000717262		30-34	0.0476126					30-34	0.00622123	0.00687892	0.00558139
	35-39	201539	98698.2	102840		35-39	0.00075521	0.000577729		35-39	0.0543537					35-39	0.00760917	0.00843965	0.0068138
	40-44	166724	81197.4	85526.6		40-44	0.00059372	0.00046476		40-44	0.0567159					40-44	0.00885433	0.00995106	0.00781313
	45-49	129748	62849.3	66899.1		45-49	0.000441101	0.000372888		45-49	0.0632325					45-49	0.0102358	0.0118789	0.00869209
	50-54	94779.3	46108.2	48671.1		50-54	0.000319426	0.000286699		50-54	0.0799176					50-54	0.0131531	0.0151716	0.0112409
	55-59	68688.9	30606.5	38082.3		55-59	0.000248851	0.000203763		55-59	0.102435					55-59	0.0164978	0.019217	0.0143125
	60-64	58913.7	23815.1	35098.7		60-64	0.000226607	0.00014294		60-64	0.11526					60-64	0.0232716	0.0274557	0.0204326
	65-69	43663.5	18163.5	25500		65-69	0.00023345	0.000118576		65-69	0.109567					65-69	0.0345811	0.0398414	0.0308343
	70-74	28632.8	11463.1	17169.9		70-74	0.000236148	0.000152487		70-74	0.0941146					70-74	0.0542281	0.0608014	0.0498391
	75-79	17615.4	6568.53	11046.8		75-79	0.000164236	2.54759e-05		75-79	0.0700564					75-79	0.0855128	0.0957156	0.0794462
	80+	12189.1	4540.75	7648.37		80+	0	0		80+	0.0431762					80+	0.180438	0.194484	0.172098
	Total	3.91564e+06	1.93562e+06	1.98002e+06		Total	0.000316667	0.000310713		Total	0.026293					Total	0.010798	0.0118581	0.00976161
	2040					2040				2040						2040
	0-4	723577	366112	357465		0-4	5.21091e-05	5.1228e-05		0-4	0.00443806					0-4	0.0250688	0.0285893	0.0214631
	5-9	602280	303150	299130		5-9	0	0		5-9	0.00571368					5-9	0.00443317	0.00504289	0.00381526
	10-14	506690	254615	252074		10-14	0	0		10-14	0.00616576					10-14	0.00242829	0.00267083	0.00218399
	15-19	423452	212412	211040		15-19	0.000196847	0.000334868		15-19	0.00990202					15-19	0.0030543	0.00343022	0.00267593
	20-24	361074	180351	180723		20-24	0.000649303	0.000771568		20-24	0.0219462					20-24	0.00439025	0.00514984	0.00363222
	25-29	313227	155529	157698		25-29	0.000826041	0.000792576		25-29	0.0435354					25-29	0.00536839	0.00599597	0.00474944
	30-34	255628	126122	129506		30-34	0.000818887	0.000673738		30-34	0.0492575					30-34	0.00618115	0.00684056	0.00553896
	35-39	207610	101700	105910		35-39	0.000708334	0.000542953		35-39	0.054439					35-39	0.00755558	0.00839241	0.00675202
	40-44	171997	83743.1	88254.4		40-44	0.000555905	0.000437102		40-44	0.0563965					40-44	0.00879472	0.00990392	0.00774415
	45-49	135726	65666.5	70059.1		45-49	0.000412258	0.000351137		45-49	0.0603931					45-49	0.0101241	0.011781	0.00857109
	50-54	99993.9	48502.4	51491.7		50-54	0.000301202	0.000270742		50-54	0.0748515					50-54	0.013013	0.01504	0.0111036
	55-59	71497.3	32859.4	38637.7		55-59	0.000231462	0.000188875		55-59	0.0965373					55-59	0.0164648	0.01905	0.0142662
	60-64	59082.4	23951.2	35131.2		60-64	0.000216005	0.000132904		60-64	0.113037					60-64	0.0232486	0.0273853	0.0204235
	65-69	45963.6	18749.1	27214.5		65-69	0.000216474	0.00011481		65-69	0.109696					65-69	0.0345292	0.0398197	0.0308844
	70-74	29410.5	12030.9	17379.4		70-74	0.000203286	0.000131986		70-74	0.0970673					70-74	0.0543182	0.0608043	0.0498287
	75-79	18202.3	6718.05	11484.1		75-79	0.000121974	2.45664e-05		75-79	0.0733426					75-79	0.0854903	0.0956989	0.0795197
	80+	12630.7	4658.96	7971.71		80+	0	0		80+	0.0454153					80+	0.180414	0.19458	0.172136
	Total	4.03804e+06	1.99687e+06	2.04117e+06		Total	0.000296683	0.000291243		Total	0.0258583					Total	0.0107743	0.0118303	0.00974115
	2041					2041				2041						2041
	0-4	744145	376518	367627		0-4	4.73967e-05	4.70374e-05		0-4	0.00435766					0-4	0.0250608	0.0285807	0.0214557
	5-9	620509	312321	308188		5-9	0	0		5-9	0.00551511					5-9	0.00443004	0.00504051	0.00381138
	10-14	523437	263026	260411		10-14	0	0		10-14	0.00609305					10-14	0.00242675	0.00266868	0.0021824
	15-19	437758	219587	218171		15-19	0.000185108	0.000314088		15-19	0.010008					15-19	0.0030471	0.00342253	0.00266923
	20-24	368730	184196	184534		20-24	0.000609353	0.000723144		20-24	0.0201858					20-24	0.00436777	0.00512687	0.00361006
	25-29	321797	159847	161951		25-29	0.000774062	0.000741951		25-29	0.0420343					25-29	0.0053445	0.00597849	0.00471875
	30-34	264743	130683	134060		30-34	0.000767766	0.000630474		30-34	0.0512562					30-34	0.00614604	0.00680864	0.0055014
	35-39	214180	104958	109222		35-39	0.00066483	0.000509322		35-39	0.05455					35-39	0.0075059	0.00834704	0.00669761
	40-44	177059	86190	90868.8		40-44	0.000521405	0.00040995		40-44	0.0563362					40-44	0.00874236	0.00986094	0.00768137
	45-49	141672	68493.7	73177.8		45-49	0.000385187	0.000327231		45-49	0.0582485					45-49	0.0100349	0.0117043	0.00847232
	50-54	105435	50971.8	54463.3		50-54	0.000283116	0.000251225		50-54	0.0701911					50-54	0.0128769	0.0149222	0.0109626
	55-59	75016.6	35425.1	39591.3		55-59	0.000220529	0.000179635		55-59	0.0909083					55-59	0.0164404	0.0189308	0.0142077
	60-64	59074.3	24050.3	35024.1		60-64	0.000197718	0.000122635		60-64	0.109987					60-64	0.0231939	0.0272796	0.0203882
	65-69	48106.2	19301	28805.2		65-69	0.000205241	0.00011284		65-69	0.109559					65-69	0.0345134	0.0397979	0.0309785
	70-74	30403.9	12607.1	17796.7		70-74	0.000188634	0.000125255		70-74	0.0993648					70-74	0.0543158	0.0608343	0.0496986
	75-79	18770.1	6910.34	11859.8		75-79	0.000120894	2.37083e-05		75-79	0.0768421					75-79	0.0855382	0.0956106	0.0796694
	80+	13084.4	4774.95	8309.42		80+	0	0		80+	0.0477595					80+	0.180395	0.19469	0.172181
	Total	4.16392e+06	2.05986e+06	2.10406e+06		Total	0.000277987	0.000272722		Total	0.0254578					Total	0.0107532	0.0118062	0.00972237
	2042					2042				2042						2042
	0-4	765282	387211	378071		0-4	4.34336e-05	4.30441e-05		0-4	0.00429129					0-4	0.0250567	0.0285765	0.0214517
	5-9	638918	321583	317335		5-9	0	0		5-9	0.00534188					5-9	0.00442691	0.00503791	0.00380772
	10-14	540547	271619	268928		10-14	0	0		10-14	0.00597044					10-14	0.00242495	0.00266676	0.00218008
	15-19	452495	226978	225517		15-19	0.00017399	0.000294416		15-19	0.0100945					15-19	0.00304238	0.00341812	0.00266421
	20-24	377579	188631	188949		20-24	0.000571111	0.000677655		20-24	0.0189572					20-24	0.00435103	0.00511064	0.0035927
	25-29	329400	163681	165718		25-29	0.000726518	0.000695628		25-29	0.0407365					25-29	0.0053271	0.00596698	0.00469508
	30-34	274308	135472	138836		30-34	0.000720694	0.000591216		30-34	0.052437					30-34	0.00610324	0.00676749	0.00545508
	35-39	221452	108571	112881		35-39	0.000623742	0.000476151		35-39	0.0546339					35-39	0.00745796	0.00830087	0.00664724
	40-44	182070	88617.8	93452.6		40-44	0.000489406	0.000382803		40-44	0.0564312					40-44	0.00869434	0.00982245	0.00762643
	45-49	147536	71297.2	76238.4		45-49	0.000362482	0.000306888		45-49	0.0567572					45-49	0.00996534	0.0116424	0.00839699
	50-54	111029	53510.9	57517.9		50-54	0.000265637	0.000236606		50-54	0.065986					50-54	0.0127504	0.0148216	0.0108236
	55-59	79296.8	38307.2	40989.5		55-59	0.000203818	0.000170178		55-59	0.0856764					55-59	0.0164224	0.0188731	0.0141279
	60-64	59028.7	24137.9	34891		60-64	0.000188536	0.000119272		60-64	0.106048					60-64	0.0231046	0.027131	0.0203238
	65-69	49910.2	19818.7	30091.6		65-69	0.000195347	0.00010215		65-69	0.109179					65-69	0.0345273	0.0397683	0.0310755
	70-74	31686.5	13162.4	18524.1		70-74	0.000196002	0.000119218		70-74	0.100906					70-74	0.0542337	0.0608672	0.0495202
	75-79	19312.1	7159.43	12152.9		75-79	0.000119815	2.29099e-05		75-79	0.0805237					75-79	0.0856624	0.09551	0.0798598
	80+	13549	4887.86	8661.15		80+	0	0		80+	0.0501375					80+	0.180371	0.194813	0.17222
	Total	4.2934e+06	2.12465e+06	2.16875e+06		Total	0.000260595	0.000255388		Total	0.025089					Total	0.0107349	0.0117857	0.00970537
	2043					2043				2043						2043
	0-4	787076	398237	388839		0-4	3.96563e-05	3.97547e-05		0-4	0.00423889					0-4	0.0250565	0.028577	0.0214508
	5-9	657545	330955	326590		5-9	0	0		5-9	0.00520011					5-9	0.00442456	0.00503585	0.00380511
	10-14	557951	280360	277592		10-14	0	0		10-14	0.00580211					10-14	0.00242289	0.00266539	0.00217798
	15-19	467703	234604	233099		15-19	0.000163444	0.000275766		15-19	0.010181					15-19	0.00303856	0.0034142	0.00266049
	20-24	387843	193763	194080		20-24	0.000535495	0.000634899		20-24	0.0185754					20-24	0.00434308	0.00510418	0.00358322
	25-29	336631	167328	169303		25-29	0.000683058	0.000652049		25-29	0.0387035					25-29	0.00530211	0.00594633	0.00466541
	30-34	283854	140256	143598		30-34	0.000677413	0.000554217		30-34	0.0534215					30-34	0.00606432	0.00673058	0.00541356
	35-39	229161	112411	116750		35-39	0.000585677	0.000447542		35-39	0.0549744					35-39	0.00741539	0.00826088	0.00660133
	40-44	187174	91093.9	96080.2		40-44	0.000459055	0.00035923		40-44	0.0563855					40-44	0.0086483	0.00978081	0.00757456
	45-49	153173	74003.3	79169.5		45-49	0.00033819	0.000287042		45-49	0.0558464					45-49	0.0099102	0.0115935	0.00833677
	50-54	116697	56100.3	60596.9		50-54	0.000246515	0.000220114		50-54	0.0622974					50-54	0.0126384	0.0147321	0.0106971
	55-59	83631.5	40380.3	43251.2		55-59	0.000192619	0.000155129		55-59	0.0805128					55-59	0.0163301	0.0187599	0.0140616
	60-64	60413.7	25628.3	34785.2		60-64	0.000179837	0.000108025		60-64	0.101079					60-64	0.0230959	0.0268416	0.0203364
	65-69	50661.1	20026.9	30634		65-69	0.000186049	9.18074e-05		65-69	0.108414					65-69	0.03462	0.0398162	0.0312233
	70-74	33270	13684.2	19585.8		70-74	0.000180832	0.000113991		70-74	0.101856					70-74	0.0541155	0.0608966	0.0493776
	75-79	19810.5	7468.57	12341.9		75-79	0.000118187	2.2127e-05		75-79	0.0842238					75-79	0.0858391	0.095405	0.0800643
	80+	14029.7	4997.52	9032.22		80+	0	0		80+	0.0525532					80+	0.180312	0.19492	0.172229
	Total	4.42662e+06	2.1913e+06	2.23533e+06		Total	0.000244424	0.000239078		Total	0.0247499					Total	0.0107194	0.0117694	0.00969008
	2044					2044				2044						2044
	0-4	809631	409648	399982		0-4	3.65495e-05	3.6113e-05		0-4	0.00419892					0-4	0.0250604	0.0285816	0.0214537
	5-9	676467	340476	335991		5-9	0	0		5-9	0.00508513					5-9	0.0044227	0.00503472	0.00380251
	10-14	575588	289217	286371		10-14	0	0		10-14	0.00560651					10-14	0.00242088	0.00266421	0.00217573
	15-19	483380	242466	240914		15-19	0.000153416	0.000258039		15-19	0.0102269					15-19	0.00303557	0.00341145	0.00265727
	20-24	399811	199745	200066		20-24	0.000503384	0.000594762		20-24	0.0186635					20-24	0.00433588	0.00509948	0.0035735
	25-29	343314	170690	172624		25-29	0.000641875	0.000610698		25-29	0.0359703					25-29	0.00527714	0.00592544	0.00463609
	30-34	293216	144946	148270		30-34	0.000636287	0.000519138		30-34	0.0545322					30-34	0.00603231	0.00670166	0.00537798
	35-39	237311	116477	120834		35-39	0.000549918	0.000419355		35-39	0.0554738					35-39	0.00738132	0.00822954	0.00656368
	40-44	192580	93734.5	98845.1		40-44	0.000431912	0.000336646		40-44	0.0565769					40-44	0.0086072	0.00974437	0.00753056
	45-49	158509	76566.9	81942.7		45-49	0.000319467	0.00026976		45-49	0.0553993					45-49	0.00986796	0.0115583	0.00828846
	50-54	122396	58725.7	63670.5		50-54	0.000233722	0.000206056		50-54	0.0591722					50-54	0.0125419	0.0146591	0.0105892
	55-59	88258.3	42526.2	45732.2		55-59	0.00018006	0.000149678		55-59	0.075663					55-59	0.01623	0.0186581	0.0139721
	60-64	62359.6	27389.5	34970		60-64	0.000164558	0.000103931		60-64	0.0957675					60-64	0.0230803	0.0266146	0.0203121
	65-69	51059.4	20185.1	30874.2		65-69	0.000166023	9.06064e-05		65-69	0.107133					65-69	0.034675	0.0398261	0.0313073
	70-74	35071.8	14172.8	20899.2		70-74	0.000167329	0.00010972		70-74	0.102443					70-74	0.0540231	0.0609217	0.0493443
	75-79	20289.3	7825.95	12463.4		75-79	0.000115384	2.13114e-05		75-79	0.0875622					75-79	0.0860308	0.0953547	0.0801762
	80+	14526.2	5108.9	9417.32		80+	0	0		80+	0.0551364					80+	0.180261	0.19499	0.172271
	Total	4.56377e+06	2.2599e+06	2.30387e+06		Total	0.000229489	0.000223823		Total	0.0244381					Total	0.0107073	0.0117576	0.00967685
	2045					2045				2045						2045
	0-4	833061	421503	411558		0-4	3.35825e-05	3.31288e-05		0-4	0.00416815					0-4	0.0250661	0.0285887	0.0214584
	5-9	695781	350193	345587		5-9	0	0		5-9	0.00499208					5-9	0.00442115	0.00503326	0.00380088
	10-14	593397	298160	295237		10-14	0	0		10-14	0.00540609					10-14	0.00241886	0.00266233	0.00217297
	15-19	499504	250553	248951		15-19	0.000143875	0.000242		15-19	0.010218					15-19	0.00303382	0.00340991	0.00265531
	20-24	413485	206583	206902		20-24	0.000474421	0.000557944		20-24	0.0188095					20-24	0.00433027	0.00509633	0.00356456
	25-29	349703	173890	175813		25-29	0.000603907	0.000572501		25-29	0.0335523					25-29	0.00525166	0.00590395	0.0046065
	30-34	302254	149479	152775		30-34	0.0005986	0.000487234		30-34	0.0542506					30-34	0.00600816	0.0066804	0.00535041
	35-39	245661	120642	125018		35-39	0.000518706	0.000392122		35-39	0.0573373					35-39	0.00735049	0.00820062	0.00653013
	40-44	198443	96617.5	101826		40-44	0.000407559	0.000316753		40-44	0.0568393					40-44	0.00856841	0.00970858	0.00748823
	45-49	163575	78992.2	84582.7		45-49	0.000300576	0.000252197		45-49	0.0552554					45-49	0.00983116	0.0115261	0.00824618
	50-54	128089	61379.8	66709		50-54	0.000219981	0.000194028		50-54	0.056698					50-54	0.0124653	0.0145994	0.0105018
	55-59	93150.6	44746.2	48404.4		55-59	0.000172055	0.000139127		55-59	0.0710989					55-59	0.0161214	0.0185621	0.0138652
	60-64	64907.9	29420.8	35487.3		60-64	0.000157301	9.9434e-05		60-64	0.0904256					60-64	0.0230703	0.0264635	0.020257
	65-69	51206	20304	30901.9		65-69	0.000158244	8.0267e-05		65-69	0.105185					65-69	0.0346793	0.0397867	0.0313235
	70-74	36928.2	14629.7	22298.4		70-74	0.000155313	9.44862e-05		70-74	0.102682					70-74	0.0539804	0.060925	0.0494242
	75-79	20830.8	8213.27	12617.5		75-79	0.000111637	2.04913e-05		75-79	0.0904364					75-79	0.0861435	0.0953571	0.0801459
	80+	15026.8	5232.41	9794.37		80+	0	0		80+	0.0578645					80+	0.180279	0.194899	0.172469
	Total	4.705e+06	2.33054e+06	2.37446e+06		Total	0.000215881	0.000209732		Total	0.0241514					Total	0.010698	0.0117502	0.00966523
	2046					2046				2046						2046
	0-4	857433	433834	423599		0-4	3.07503e-05	3.02807e-05		0-4	0.00414304					0-4	0.0250723	0.0285959	0.0214631
	5-9	715573	360152	355421		5-9	0	0		5-9	0.00491772					5-9	0.00441959	0.00503184	0.0037992
	10-14	611364	307184	304181		10-14	0	0		10-14	0.00521477					10-14	0.00241661	0.00266098	0.00216982
	15-19	516041	258845	257195		15-19	0.00013636	0.000228312		15-19	0.0101622					15-19	0.00303241	0.00340906	0.00265402
	20-24	427531	213605	213926		20-24	0.000448048	0.000524182		20-24	0.0189418					20-24	0.00432485	0.00509377	0.00355709
	25-29	357192	177634	179558		25-29	0.000570959	0.000539365		25-29	0.0318944					25-29	0.00522488	0.00588063	0.00457617
	30-34	310621	153678	156942		30-34	0.000565238	0.000457859		30-34	0.0528814					30-34	0.00598622	0.0066615	0.00532499
	35-39	254507	125052	129455		35-39	0.000489168	0.000369986		35-39	0.059544					35-39	0.00732488	0.00817959	0.00649925
	40-44	204785	99745.2	105040		40-44	0.000383942	0.000297511		40-44	0.0571246					40-44	0.00853196	0.00967172	0.00744966
	45-49	168436	81323	87113		45-49	0.000283397	0.000238522		45-49	0.0553411					45-49	0.00979832	0.0114987	0.00820894
	50-54	133746	64041.4	69704.9		50-54	0.000205553	0.000183802		50-54	0.0548527					50-54	0.0124049	0.0145536	0.0104308
	55-59	98257.8	47035.3	51222.6		55-59	0.0001638	0.00012909		55-59	0.0668916					55-59	0.016013	0.0184807	0.013747
	60-64	68097.3	31723.1	36374.2		60-64	0.000149866	8.82585e-05		60-64	0.0852912					60-64	0.023075	0.0263926	0.0201817
	65-69	51209.4	20396.2	30813.2		65-69	0.000151147	7.86819e-05		65-69	0.102451					65-69	0.0346302	0.0396823	0.0312861
	70-74	38650.1	15060.8	23589.4		70-74	0.000147271	9.28858e-05		70-74	0.102665					70-74	0.0539968	0.060919	0.0495768
	75-79	21535.8	8604.53	12931.1		75-79	0.000103323	1.94319e-05		75-79	0.0926867					75-79	0.0861117	0.0954151	0.0799354
	80+	15516.6	5379.2	10137.6		80+	0	0		80+	0.0608585					80+	0.180399	0.19467	0.172807
	Total	4.8505e+06	2.40329e+06	2.4472e+06		Total	0.000203677	0.000197066		Total	0.0238878					Total	0.0106911	0.0117466	0.00965443
	2047					2047				2047						2047
	0-4	882771	446653	436118		0-4	2.80494e-05	2.75654e-05		0-4	0.00412144					0-4	0.025077	0.0286021	0.0214672
	5-9	735912	370385	365526		5-9	0	0		5-9	0.00486075					5-9	0.00441857	0.00503092	0.00379807
	10-14	629508	316296	313213		10-14	0	0		10-14	0.00504817					10-14	0.00241462	0.0026595	0.00216788
	15-19	532934	267317	265617		15-19	0.000129192	0.000215272		15-19	0.0100539					15-19	0.00303131	0.0034079	0.00265231
	20-24	441999	220837	221161		20-24	0.00042579	0.00049587		20-24	0.019051					20-24	0.00432031	0.00509195	0.00355056
	25-29	365850	181954	183896		25-29	0.000541694	0.000509962		25-29	0.0307428					25-29	0.00520224	0.00586232	0.00454821
	30-34	318039	157406	160633		30-34	0.00053742	0.000433576		30-34	0.0516692					30-34	0.00596763	0.00664506	0.00530274
	35-39	263796	129685	134112		35-39	0.000464834	0.000349778		35-39	0.0609824					35-39	0.00729198	0.00814859	0.00646365
	40-44	211800	103213	108587		40-44	0.000364424	0.000280394		40-44	0.0573895					40-44	0.00849653	0.0096368	0.00741268
	45-49	173248	83635.1	89613.1		45-49	0.000269769	0.000223778		45-49	0.0555604					45-49	0.00976708	0.0114734	0.00817464
	50-54	139321	66678.2	72642.5		50-54	0.000196256	0.000172571		50-54	0.0535961					50-54	0.012358	0.0145168	0.0103788
	55-59	103509	49388.3	54121		55-59	0.000155587	0.000123566		55-59	0.0630906					55-59	0.0159096	0.0184039	0.0136335
	60-64	71971.9	34297.8	37674.1		60-64	0.000142456	8.36047e-05		60-64	0.0805116					60-64	0.023095	0.0264065	0.0200803
	65-69	51190.4	20483.7	30706.6		65-69	0.000144132	7.65123e-05		65-69	0.0988627					65-69	0.0345294	0.0395213	0.0311997
	70-74	40092.8	15465.1	24627.7		70-74	0.000140198	9.17468e-05		70-74	0.102409					70-74	0.0540507	0.0609195	0.0497444
	75-79	22457	8981.07	13476		75-79	9.53174e-05	1.84932e-05		75-79	0.0942169					75-79	0.0859615	0.0954721	0.0796232
	80+	15992.2	5555.41	10436.8		80+	0	0		80+	0.0640552					80+	0.180565	0.194438	0.17318
	Total	5.00039e+06	2.47823e+06	2.52216e+06		Total	0.000193267	0.00018621		Total	0.0236459					Total	0.0106859	0.0117465	0.00964391
	2048					2048				2048						2048
	0-4	909098	459973	449125		0-4	2.5476e-05	2.54249e-05		0-4	0.00410182					0-4	0.0250814	0.028607	0.0214702
	5-9	756879	380935	375944		5-9	0	0		5-9	0.00481887					5-9	0.00441799	0.00503036	0.00379749
	10-14	647867	325516	322352		10-14	0	0		10-14	0.00491257					10-14	0.00241301	0.00265775	0.00216586
	15-19	550118	275935	274184		15-19	0.000123833	0.000205082		15-19	0.00989742					15-19	0.00303022	0.00340686	0.00265118
	20-24	456929	228301	228628		20-24	0.000407281	0.000472524		20-24	0.0191573					20-24	0.00431655	0.00509035	0.00354386
	25-29	375888	186952	188937		25-29	0.00051899	0.000485047		25-29	0.0304038					25-29	0.0051862	0.00585201	0.00452738
	30-34	325093	160949	164144		30-34	0.000514717	0.000412733		30-34	0.0497319					30-34	0.00594339	0.0066242	0.00527688
	35-39	273068	134313	138755		35-39	0.000445228	0.000332844		35-39	0.0622107					35-39	0.00726241	0.00812254	0.00642982
	40-44	219232	106896	112336		40-44	0.000349132	0.000267403		40-44	0.0578901					40-44	0.00846523	0.00960569	0.00738
	45-49	178148	85993.4	92154.5		45-49	0.000256866	0.000214148		45-49	0.0556477					45-49	0.00973469	0.0114412	0.00814228
	50-54	144676	69221.7	75453.8		50-54	0.000188608	0.000162995		50-54	0.0528693					50-54	0.0123239	0.0144901	0.0103367
	55-59	108829	51786.6	57042.6		55-59	0.000148193	0.000118546		55-59	0.0597508					55-59	0.0158173	0.0183411	0.013526
	60-64	75928.1	36164.6	39763.4		60-64	0.000134607	8.43663e-05		60-64	0.0758033					60-64	0.023016	0.0263159	0.0200147
	65-69	52387.4	21779.1	30608.5		65-69	0.000137479	7.39035e-05		65-69	0.0942988					65-69	0.0345307	0.0391501	0.0312437
	70-74	40667.4	15619.7	25047.7		70-74	0.000133526	7.93671e-05		70-74	0.101786					70-74	0.0542377	0.0610392	0.0499962
	75-79	23597.1	9334.69	14262.4		75-79	8.79414e-05	1.76895e-05		75-79	0.0951851					75-79	0.0857741	0.0955392	0.079371
	80+	16446.9	5760.53	10686.4		80+	0	0		80+	0.0673289					80+	0.180794	0.194197	0.173569
	Total	5.15485e+06	2.55543e+06	2.59942e+06		Total	0.000184747	0.000177104		Total	0.0234242					Total	0.0106825	0.0117495	0.00963362
	2049					2049				2049						2049
	0-4	936434	473803	462631		0-4	2.34525e-05	2.33831e-05		0-4	0.00408397					0-4	0.025086	0.0286126	0.0214739
	5-9	778576	391852	386724		5-9	0	0		5-9	0.00478751					5-9	0.0044177	0.00502992	0.00379736
	10-14	666516	334881	331634		10-14	0	0		10-14	0.00480335					10-14	0.00241172	0.00265699	0.00216404
	15-19	567531	284667	282865		15-19	0.00011871	0.000195362		15-19	0.00971402					15-19	0.00302919	0.00340573	0.00265025
	20-24	472318	235995	236324		20-24	0.000389591	0.000449387		20-24	0.0192224					20-24	0.00431282	0.00508823	0.00353776
	25-29	387590	192776	194814		25-29	0.000496103	0.000461192		25-29	0.0305386					25-29	0.00517086	0.00584203	0.00450671
	30-34	331611	164214	167397		30-34	0.00049166	0.000392491		30-34	0.047093					30-34	0.00591839	0.00659978	0.00524996
	35-39	282159	138848	143310		35-39	0.000426432	0.0003167		35-39	0.0635328					35-39	0.00723822	0.00810119	0.00640211
	40-44	227090	110796	116294		40-44	0.000333779	0.000254444		40-44	0.0585368					40-44	0.00844052	0.00958259	0.00735393
	45-49	183333	88506.9	94826.3		45-49	0.000246581	0.000202812		45-49	0.0559586					45-49	0.00970572	0.011414	0.00811131
	50-54	149742	71629.4	78112.7		50-54	0.00017967	0.000154749		50-54	0.052564					50-54	0.0122988	0.0144712	0.0103046
	55-59	114175	54216.8	59958.5		55-59	0.000142081	0.000110975		55-59	0.0569259					55-59	0.0157405	0.0182889	0.0134361
	60-64	80155.2	38096.8	42058.4		60-64	0.000131524	7.87651e-05		60-64	0.0713762					60-64	0.0229291	0.0262296	0.0199395
	65-69	54072.4	23299.4	30773		65-69	0.000131513	7.10908e-05		65-69	0.0894235					65-69	0.0345178	0.0388716	0.0312213
	70-74	40969.2	15739.3	25229.9		70-74	0.000127084	7.83156e-05		70-74	0.100684					70-74	0.054356	0.0610972	0.0501438
	75-79	24889.6	9666.06	15223.7		75-79	8.14409e-05	1.7038e-05		75-79	0.0958062					75-79	0.0856365	0.0955912	0.0793037
	80+	16899.4	5988.75	10910.8		80+	0	0		80+	0.070384					80+	0.180964	0.194052	0.173777
	Total	5.31406e+06	2.63498e+06	2.67909e+06		Total	0.000176509	0.000168164		Total	0.0232215					Total	0.0106809	0.0117556	0.00962392
	2050					2050				2050						2050
	0-4	964799	488154	476645		0-4	2.15233e-05	2.14367e-05		0-4	0.00406735					0-4	0.0250909	0.0286185	0.0214782
	5-9	801113	403192	397921		5-9	0	0		5-9	0.00476387					5-9	0.00441771	0.00503017	0.00379713
	10-14	685551	344441	341110		10-14	0	0		10-14	0.00471568					10-14	0.00241038	0.00265576	0.00216261
	15-19	585114	293484	291631		15-19	0.000113126	0.000184702		15-19	0.00952617					15-19	0.00302792	0.00340484	0.00264861
	20-24	488146	243907	244239		20-24	0.00037019	0.000424819		20-24	0.0192312					20-24	0.00430931	0.00508729	0.00353238
	25-29	400955	199431	201524		25-29	0.000471916	0.000436218		25-29	0.0307279					25-29	0.0051568	0.00583322	0.0044874
	30-34	337845	167324	170521		30-34	0.000468284	0.00037045		30-34	0.0447753					30-34	0.00589325	0.00657631	0.005223
	35-39	290933	143231	147702		35-39	0.000405569	0.000299909		35-39	0.0634043					35-39	0.00721513	0.00808263	0.0063739
	40-44	235138	114790	120348		40-44	0.000318773	0.000240114		40-44	0.0605745					40-44	0.00842518	0.00956804	0.0073351
	45-49	188955	91249.6	97704.9		45-49	0.000234387	0.000191805		45-49	0.056338					45-49	0.00967773	0.0113859	0.0080842
	50-54	154550	73906.6	80643.5		50-54	0.000169353	0.000147561		50-54	0.0525335					50-54	0.0122771	0.0144581	0.0102782
	55-59	119511	56671.9	62838.9		55-59	0.000133734	0.000104498		55-59	0.054698					55-59	0.0156776	0.0182483	0.0133619
	60-64	84629.1	40095.7	44533.4		60-64	0.000122168	7.32042e-05		60-64	0.067209					60-64	0.0228329	0.0261508	0.0198417
	65-69	56278.3	25041.3	31236.9		65-69	0.000125707	6.04486e-05		65-69	0.0845251					65-69	0.0345115	0.0387091	0.031141
	70-74	41082.1	15833.1	25248.9		70-74	0.00012112	7.7068e-05		70-74	0.098931					70-74	0.0543856	0.0610812	0.0501873
	75-79	26213	9976.57	16236.5		75-79	7.57115e-05	1.65223e-05		75-79	0.0961243					75-79	0.0855877	0.0956341	0.0794251
	80+	17396.4	6233.9	11162.5		80+	0	0		80+	0.0732235					80+	0.180957	0.193995	0.173676
	Total	5.47821e+06	2.71696e+06	2.76125e+06		Total	0.000167875	0.000158952		Total	0.0230361					Total	0.0106811	0.0117641	0.0096155

## Sheet: Tete, part 1
	Input	Data		Reference
	Percent circumcised in base year (2009), by 5-year age group	EIMC	0.0115645	Ministerio da Saude (MISAU), Instituto Nacional de Estatística (INE) e ICF International (ICFI) (2013). Moçambique Inquérito Demográfico e de Saúde 2011. Calverton, Maryland; 2013. (age >15 years)
		5-9	0.0129435
		10-14	0.0143224
		15-19	0.0157013
		20-24	0.0190845
		25-29	0.0228146
		30-34	0.0224677
		35-39	0.0224677
		40-44	0.0246363
		45-49	0.0246363
		50-54	0.0246363
		55-59	0.0246363
	VMMC effectiveness		0.6	Auvert B, Taljaard D, Lagarde E, Sobngwi-Tambekou J, Sitta R, et al. (2005) Randomized, controlled intervention trial of male circumcision for reduction of HIV infection risk: The ANRS 1265 trial. PLoS Med 2(11): e298.			Baseline MC prevalence, demographic
				Gray RH, Kigozi G, Serwadda D, Makumbi F, Watya S, Nalugoda N et al. Male circumcision for HIV prevention n men in Rakai, Uganda: a randomized trial. Lancet 2007; 369: 767-66.
				Bailey RC, Moses S, Parker CB, Agot K, Maclean I, Krieger JN, et al. Male circumcision for HIV prevention in young men in Kisumu, Kenya: a randomized controlled trial. Lancet 2007; 369: 643-56.
	Ratio of infections averted among females to males		0.415824	Spectrum, Goals Model
	HIV incidence		See Part 2	Authors’ Calculations
				Spectrum, AIDS Impact Module and Goals module
	Discount rate		0.03	Authors’ assumption.

## Sheet: Tete, part 2
																Mortality rates
			Population by age and sex				Incidence			Prevalence			Total Births								Annual mortality on ART	0
		Total	Male	Female			Male	Female			Male			Male			Total	Male	Female		Non–AIDS mortality
	2000					2000				2000			2000	40057.7		2000					0–4	0.0419096
	0-4	311338	156918	154420		0-4	0.00382364	0.00378193		0-4	0.0102341		2001	40928.2		0-4	0.0507174	0.0553429	0.046017		5–9	0.00757741
	5-9	241137	120718	120420		5-9	0	0		5-9	0.0031037		2002	41896.6		5-9	0.00916329	0.00965938	0.00866596		10–14	0.00389999
	10-14	189912	94921.5	94990.4		10-14	0	0		10-14	0.000844592		2003	42809.2		10-14	0.00448039	0.00459699	0.00436152		15–19	0.00468382
	15-19	148234	71098.9	77135.3		15-19	0.00366831	0.00636454		15-19	0.015965		2004	43762.3		15-19	0.00544558	0.00520682	0.00566566		20–24	0.00830714
	20-24	134973	59366.2	75607		20-24	0.0121029	0.0148188		20-24	0.0429361		2005	44864		20-24	0.00798898	0.00828071	0.00775993		25–29	0.0132357
	25-29	120665	54680.5	65984.1		25-29	0.0155109	0.0152164		25-29	0.0652818		2006	45982.9		25-29	0.0106679	0.0115077	0.00997185		30–34	0.0154483
	30-34	94070.6	44010.9	50059.5		30-34	0.0154047	0.0129248		30-34	0.0776851		2007	47216.2		30-34	0.0127365	0.0136396	0.0119426		35–39	0.0211122
	35-39	77424.4	34394.7	43029.7		35-39	0.0132776	0.010392		35-39	0.0818957		2008	48313.2		35-39	0.0160934	0.0180035	0.0145666		40–44	0.0219866
	40-44	61468.2	28497.3	32970.9		40-44	0.0103919	0.00833502		40-44	0.0712189		2009	49458.5		40-44	0.0175605	0.0205178	0.0150045		45–49	0.0221717
	45-49	48795.2	23289.1	25506.3		45-49	0.0076344	0.00665199		45-49	0.0542458		2010	50673.2		45-49	0.0188209	0.0227725	0.0152039		50–54	0.0225549
	50-54	38481.3	18568.1	19913.2		50-54	0.00555291	0.00508169		50-54	0.0373674		2011	51930.5		50-54	0.0211622	0.0245678	0.0179754		55–59	0.0246977
	55-59	29995.3	14287.9	15707.6		55-59	0.00435239	0.00361781		55-59	0.0301253		2012	53231.6		55-59	0.0244908	0.0278432	0.0214552		60–64	0.0310525
	60-64	23663.3	11412.9	12250.6		60-64	0.00397434	0.00253226		60-64	0.0222645		2013	54020.3		60-64	0.0322395	0.0364768	0.0283096		65–69	0.04295
	65-69	17924.6	8844.68	9079.9		65-69	0.00406033	0.00219082		65-69	0.0164778		2014	54977.5		65-69	0.045842	0.0503677	0.0414581		70–74	0.0651726
	70-74	11984.9	6108.51	5876.41		70-74	0.00393859	0.00261721		70-74	0.0158028		2015	55925.2		70-74	0.0704197	0.0762106	0.0644		75–79	0.101246
	75-79	6316.1	3432.47	2883.63		75-79	0.00262852	0.000644489		75-79	0.0135298		2016	56881.2		75-79	0.109183	0.117716	0.0990267		80–84	0.199417
	80+	5504.65	3067.62	2437.03		80+	0	0		80+	0.00361039		2017	57844.6		80+	0.216202	0.227781	0.201627
	Total	1.56189e+06	753617	808271		Total	0.00523167	0.00569344		Total	0.0272302		2018	58741.1		Total	0.0206945	0.0230839	0.0184666
	2001					2001				2001			2019	59529.2		2001
	0-4	319358	160966	158392		0-4	0.00398485	0.00394063		0-4	0.0116304		2020	60372.5		0-4	0.0498811	0.0544937	0.0451921
	5-9	250649	125513	125136		5-9	0	0		5-9	0.00382843		2021	62417.1		5-9	0.00894886	0.0094643	0.00843189
	10-14	198432	99139.8	99292.9		10-14	0	0		10-14	0.00118569		2022	64514.4		10-14	0.00438903	0.00452047	0.00425777
	15-19	154735	75907.7	78827.4		15-19	0.00354551	0.00626407		15-19	0.0171305		2023	66683		15-19	0.00541256	0.00514986	0.00566554
	20-24	133970	59044.5	74925.9		20-24	0.0117207	0.0146154		20-24	0.0461606		2024	68917.2		20-24	0.00815852	0.00826546	0.00807425
	25-29	125327	55767.7	69558.9		25-29	0.0150145	0.0150104		25-29	0.0712804		2025	71208.3		25-29	0.0112859	0.0118865	0.0108075
	30-34	96847.1	45766.8	51080.3		30-34	0.0149303	0.0127638		30-34	0.0850856		2026	73572.5		30-34	0.0134616	0.014299	0.0127069
	35-39	79582.8	35159.3	44423.4		35-39	0.0128482	0.0102494		35-39	0.0899799		2027	76030.5		35-39	0.0172523	0.0191515	0.0157442
	40-44	63310.7	29069.5	34241		40-44	0.0100563	0.00822225		40-44	0.0785105		2028	78575.5		40-44	0.0186467	0.0217383	0.0160222
	45-49	50090	23644	26446.1		45-49	0.00738538	0.00656303		45-49	0.0600429		2029	81187.9		45-49	0.0198063	0.0239946	0.0160534
	50-54	39623.8	19100.7	20522.9		50-54	0.00537314	0.00501187		50-54	0.0412871		2030	83852.3		50-54	0.0219686	0.0254455	0.018733
	55-59	30676.6	14551.1	16125.5		55-59	0.00421535	0.0035663		55-59	0.0331178		2031	86564		55-59	0.0249706	0.0282885	0.0219767
	60-64	24091.9	11545.2	12546.5		h ju	0.003855	0.00249266		60-64	0.024582		2032	89320.9		60-64	0.0324334	0.0367148	0.0284943
	65-69	18207.2	8880.54	9326.92		65-69	0.00393407	0.00215524		65-69	0.0181402		2033	92105.4		65-69	0.0456931	0.0502897	0.0412915
	70-74	12360.5	6237.92	6122.32		70-74	0.00380244	0.00257977		70-74	0.0173311		2034	94899.7		70-74	0.0699741	0.0758793	0.0639598
	75-79	6628.39	3488.16	3140.45		75-79	0.00257593	0.000619371		75-79	0.0148653		2035	97691.3		75-79	0.10824	0.116986	0.0985176
	80+	5254.51	2920.38	2334.12		80+	0	0		80+	0.00400789		2036	100512		80+	0.21437	0.226299	0.199447
	Total	1.60914e+06	776702	832443		Total	0.00507884	0.00557735		Total	0.0297644		2037	103395		Total	0.0206299	0.0229009	0.018511
	2002					2002				2002			2038	106340		2002
	0-4	327154	164918	162236		0-4	0.0040715	0.00402623		0-4	0.0129268		2039	109354		0-4	0.0492003	0.0536996	0.0446279
	5-9	260112	130278	129834		5-9	0	0		5-9	0.00463996		2040	112437		5-9	0.00876631	0.00927712	0.00825376
	10-14	207225	103516	103709		10-14	0	0		10-14	0.00160244		2041	115616		10-14	0.0043146	0.00444773	0.0041817
	15-19	162574	81384.3	81189.4		15-19	0.00316588	0.00567282		15-19	0.017968		2042	118912		15-19	0.00538725	0.00511258	0.00566258
	20-24	132928	58679.9	74247.8		20-24	0.0104985	0.0132548		20-24	0.0482855		2043	122341		20-24	0.00834484	0.00823711	0.00842998
	25-29	128957	56705.5	72251.8		25-29	0.0134433	0.0136198		25-29	0.0763361		2044	125920		25-29	0.0119889	0.0122752	0.0117642
	30-34	100280	47375.2	52905.3		30-34	0.0133737	0.0115849		30-34	0.0913382		2045	129653		30-34	0.014249	0.0149842	0.0135906
	35-39	81579.7	36127.8	45451.8		35-39	0.0114989	0.00930232		35-39	0.0970711		2046	133531		35-39	0.0185338	0.0203705	0.0170787
	40-44	65101.3	29569.4	35532		40-44	0.0090049	0.0074661		40-44	0.0850107		2047	137545		40-44	0.0198514	0.0230356	0.0171953
	45-49	51424.5	24009.9	27414.6		45-49	0.00661482	0.00595899		45-49	0.0652868		2048	141708		45-49	0.0208906	0.0252987	0.01703
	50-54	40709.9	19548.8	21161		50-54	0.00480892	0.00455532		50-54	0.0447699		2049	146038		50-54	0.0228544	0.0263776	0.0195996
	55-59	31421.7	14875.7	16546		55-59	0.00377082	0.00323425		55-59	0.0356948		2050	150531		55-59	0.025534	0.0287943	0.0226162
	60-64	24527.4	11680	12847.6		60-64	0.00345181	0.00226908		60-64	0.0266689					60-64	0.0326931	0.0369777	0.0287973
	65-69	18503	8932.67	9570.38		65-69	0.00351924	0.00196329		65-69	0.0195701					65-69	0.0456127	0.0502456	0.0412885
	70-74	12699.7	6340.16	6359.54		70-74	0.00341981	0.00233963		70-74	0.0186					70-74	0.0696659	0.0756394	0.0637106
	75-79	6927.76	3556.32	3371.44		75-79	0.00230482	0.000580809		75-79	0.0160314					75-79	0.107517	0.116184	0.0983747
	80+	5099.26	2809.68	2289.58		80+	0	0		80+	0.00447935					80+	0.21203	0.224275	0.197004
	Total	1.65722e+06	800307	856917		Total	0.0046212	0.00508682		Total	0.0318901					Total	0.0206362	0.0227442	0.0186675
	2003					2003				2003						2003
	0-4	334992	168888	166105		0-4	0.00413496	0.00408874		0-4	0.0140262					0-4	0.0483556	0.0528384	0.043799
	5-9	269252	134880	134372		5-9	0	0		5-9	0.00552764					5-9	0.00856304	0.00909104	0.00803303
	10-14	216226	108017	108209		10-14	0	0		10-14	0.00209144					10-14	0.00423594	0.00438199	0.00409014
	15-19	170089	85075.4	85013.2		15-19	0.00280934	0.0051028		15-19	0.0180421					15-19	0.00533257	0.00504786	0.00561749
	20-24	135282	61484.4	73797.5		20-24	0.00936972	0.0119538		20-24	0.0484738					20-24	0.00851081	0.00815844	0.00880439
	25-29	129852	56791	73061.1		25-29	0.0119959	0.0122929		25-29	0.0799509					25-29	0.0127211	0.0126803	0.0127559
	30-34	104393	48784.1	55609.1		30-34	0.0119344	0.0104549		30-34	0.0958646					30-34	0.0150575	0.0156747	0.014516
	35-39	83337.5	37321.9	46015.6		35-39	0.010268	0.00840254		35-39	0.102514					35-39	0.0198588	0.0216047	0.0184427
	40-44	66855	29977.9	36877.1		40-44	0.00804323	0.00674675		40-44	0.0901917					40-44	0.0210865	0.0243638	0.0184224
	45-49	52797.2	24401.1	28396.2		45-49	0.00590438	0.00538026		45-49	0.0695683					45-49	0.0220055	0.0266367	0.0180258
	50-54	41725.6	19897.4	21827.9		50-54	0.00429376	0.00411772		50-54	0.0475214					50-54	0.0237287	0.0273371	0.0204396
	55-59	32238.9	15267	16971.9		55-59	0.00337058	0.00292234		55-59	0.0375662					55-59	0.0260958	0.0292963	0.0232167
	60-64	24970.8	11812.7	13158.1		60-64	0.00308776	0.00204674		60-64	0.0283189					60-64	0.032942	0.0372787	0.0290488
	65-69	18816.2	9004.39	9811.83		65-69	0.00315244	0.00176732		65-69	0.0206023					65-69	0.0455164	0.0502165	0.0412032
	70-74	12996.2	6410.32	6585.85		70-74	0.00304093	0.00212428		70-74	0.0194566					70-74	0.0692764	0.0753675	0.0633477
	75-79	7212.42	3636.95	3575.47		75-79	0.00203354	0.000505144		75-79	0.0169217					75-79	0.106733	0.115385	0.0978694
	80+	5033.1	2732.17	2300.71		80+	0	0		80+	0.00502102					80+	0.20955	0.222322	0.194404
	Total	1.70607e+06	824381	881687		Total	0.00420759	0.00463317		Total	0.0334058					Total	0.0206113	0.0225858	0.0187651
	2004					2004				2004						2004
	0-4	343164	173024	170140		0-4	0.00416802	0.00412166		0-4	0.014886					0-4	0.0474099	0.0518726	0.0428716
	5-9	277916	139239	138677		5-9	0	0		5-9	0.00650435					5-9	0.00836502	0.00891045	0.00781738
	10-14	225383	112613	112770		10-14	0	0		10-14	0.00264646					10-14	0.00416167	0.00432182	0.00400175
	15-19	177907	88915.5	88991.9		15-19	0.00252845	0.00462231		15-19	0.0176026					15-19	0.00524346	0.00497765	0.00550901
	20-24	138926	64902.7	74023.3		20-24	0.00849995	0.0108701		20-24	0.0478813					20-24	0.00866276	0.00808226	0.00917172
	25-29	129720	56699.3	73021		25-29	0.0108787	0.0111873		25-29	0.0820225					25-29	0.0133917	0.0130112	0.0136871
	30-34	108940	49993.6	58947		30-34	0.0108191	0.00950639		30-34	0.0988471					30-34	0.0158316	0.0163024	0.015436
	35-39	84924.1	38695.2	46229		35-39	0.00932506	0.00765143		35-39	0.106327					35-39	0.0211192	0.0227434	0.0197597
	40-44	68577.7	30326.5	38251.2		40-44	0.00729983	0.00614701		40-44	0.0940935					40-44	0.0222588	0.0255968	0.0196124
	45-49	54188.3	24807.3	29381.2		45-49	0.00535604	0.00490169		45-49	0.0728833					45-49	0.0230437	0.0278706	0.0189681
	50-54	42687.8	20163.4	22524.2		50-54	0.00389544	0.003752		50-54	0.0495723					50-54	0.0244826	0.0281917	0.0211527
	55-59	33118.8	15708.5	17410.5		55-59	0.00305754	0.00266044		55-59	0.0387778					55-59	0.0265795	0.0297208	0.0237449
	60-64	25430.8	11950.4	13480.4		60-64	0.00279497	0.00186918		60-64	0.0295093					60-64	0.0331257	0.037483	0.0292465
	65-69	19141.9	9090.81	10051.1		65-69	0.00285327	0.00161454		65-69	0.0213063					65-69	0.0453821	0.0501311	0.0410868
	70-74	13254.1	6455.32	6798.79		70-74	0.00276247	0.00193548		70-74	0.0199253					70-74	0.0688021	0.0750147	0.0629361
	75-79	7501.54	3733.84	3767.7		75-79	0.00184382	0.000467202		75-79	0.0174601					75-79	0.105885	0.114598	0.097251
	80+	5028.43	2677.37	2351.05		80+	0	0		80+	0.00559385					80+	0.207353	0.220632	0.192231
	Total	1.75581e+06	848995	906815		Total	0.0038886	0.00426023		Total	0.0343751					Total	0.0205515	0.0223938	0.0188267
	2005					2005				2005						2005
	0-4	351932	177472	174460		0-4	0.00419003	0.00414351		0-4	0.0154341					0-4	0.0463933	0.0508348	0.0418752
	5-9	286122	143349	142773		5-9	0	0		5-9	0.00753208					5-9	0.00817416	0.00873732	0.00760872
	10-14	234683	117291	117393		10-14	0	0		10-14	0.00326413					10-14	0.00409356	0.00426531	0.00392007
	15-19	186034	92916.6	93117.1		15-19	0.0022895	0.00420739		15-19	0.0166035					15-19	0.00513174	0.00490235	0.00535825
	20-24	143868	68941.4	74926.5		20-24	0.00774852	0.00991961		20-24	0.0463323					20-24	0.00876154	0.00800618	0.00945357
	25-29	128887	56470.3	72416.9		25-29	0.00991587	0.0102169		25-29	0.0821657					25-29	0.013893	0.0131902	0.0144411
	30-34	113463	51026.7	62436.4		30-34	0.00985074	0.00866843		30-34	0.0999906					30-34	0.0164275	0.016745	0.0161716
	35-39	86617.2	40161.7	46455.5		35-39	0.00850868	0.00699071		35-39	0.108167					35-39	0.0221002	0.0235712	0.0208284
	40-44	70236.9	30702	39534.7		40-44	0.00665192	0.00561408		40-44	0.0964679					40-44	0.0231537	0.026517	0.020542
	45-49	55585.8	25208.5	30377.3		45-49	0.0048874	0.00447777		45-49	0.0750685					45-49	0.0237987	0.0287524	0.0196806
	50-54	43634	20379.2	23254.8		50-54	0.00355067	0.00342545		50-54	0.0508444					50-54	0.0249063	0.0287457	0.0215513
	55-59	34032.9	16162.2	17870.7		55-59	0.00279519	0.00243789		55-59	0.0392621					55-59	0.0268146	0.0299338	0.024006
	60-64	25926	12111.9	13814.1		60-64	0.00255165	0.00170814		60-64	0.0301757					60-64	0.0331289	0.0374982	0.0292818
	65-69	19480.4	9188.6	10291.8		65-69	0.00261279	0.00147119		65-69	0.0216275					65-69	0.0451193	0.049937	0.0408181
	70-74	13490.7	6487.84	7002.82		70-74	0.00251908	0.00175929		70-74	0.0199613					70-74	0.0681901	0.074467	0.0623748
	75-79	7784.2	3834.52	3949.68		75-79	0.00168247	0.000435914		75-79	0.0176581					75-79	0.104988	0.113738	0.0964922
	80+	5075.42	2644.63	2430.8		80+	0	0		80+	0.006139					80+	0.205214	0.218816	0.190415
	Total	1.80685e+06	874348	932504		Total	0.00361832	0.00394213		Total	0.0346856					Total	0.0204087	0.0221279	0.0187968
	2006					2006				2006						2006
	0-4	361308	182243	179066		0-4	0.00459134	0.00454037		0-4	0.0152187					0-4	0.0453361	0.0496557	0.0409399
	5-9	293934	147265	146669		5-9	0	0		5-9	0.00833254					5-9	0.00801071	0.00856848	0.00745066
	10-14	244057	122006	122051		10-14	0	0		10-14	0.00383502					10-14	0.00404129	0.00421548	0.00386534
	15-19	194456	97076.1	97379.5		15-19	0.00206049	0.00379511		15-19	0.0148791					15-19	0.00500227	0.00482308	0.0051809
	20-24	150130	73616.1	76514.3		20-24	0.0069939	0.00895031		20-24	0.0429578					20-24	0.00877736	0.00791533	0.00960965
	25-29	127714	56153.3	71560.9		25-29	0.00895105	0.00922363		25-29	0.0783286					25-29	0.0141863	0.0131694	0.0149842
	30-34	117443	51927.2	65515.2		30-34	0.00889077	0.00782218		30-34	0.0968722					30-34	0.0167528	0.0169265	0.0166152
	35-39	88769.8	41605.5	47164.3		35-39	0.00770306	0.00631774		35-39	0.105305					35-39	0.0226859	0.0239792	0.021545
	40-44	71800.1	31218.6	40581.6		40-44	0.00600647	0.00506877		40-44	0.0948426					40-44	0.0236672	0.0269773	0.0211153
	45-49	56978.4	25580	31398.5		45-49	0.00441442	0.0040446		45-49	0.0742079					45-49	0.0241592	0.0291446	0.0200975
	50-54	44618.8	20591.9	24026.9		50-54	0.00320762	0.00309479		50-54	0.0501303					50-54	0.0249257	0.0288598	0.0215541
	55-59	34947.1	16583.2	18363.8		55-59	0.00252081	0.0022037		55-59	0.0381263					55-59	0.0267505	0.0298321	0.0239678
	60-64	26479	12321.5	14157.6		60-64	0.00231089	0.00153873		60-64	0.0295474					60-64	0.0329164	0.0372399	0.0291536
	65-69	19832.4	9293.96	10538.4		65-69	0.00235248	0.00133515		65-69	0.0211061					65-69	0.0447454	0.0495626	0.0404971
	70-74	13727.4	6524.37	7203.07		70-74	0.00229185	0.00159905		70-74	0.0191378					70-74	0.0674845	0.0737428	0.0618158
	75-79	8051.27	3926.07	4125.2		75-79	0.00152375	0.0003795		75-79	0.0170697					75-79	0.10405	0.112788	0.0956803
	80+	5160.73	2632.82	2528.13		80+	0	0		80+	0.00645649					80+	0.203375	0.217005	0.189163
	Total	1.85941e+06	900565	958843		Total	0.00343489	0.0037058		Total	0.0335101					Total	0.0201679	0.0217471	0.0186849
	2007					2007				2007						2007	0	0	0
	0-4	371557	187452	184105		0-4	0.00454853	0.00449964		0-4	0.0148984					0-4	0.0435916	0.0478765	0.0392288
	5-9	301616	151120	150496		5-9	0	0		5-9	0.00922568					5-9	0.00779929	0.00837498	0.00722122
	10-14	253401	126697	126704		10-14	0	0		10-14	0.00451996					10-14	0.00397051	0.00415785	0.00378143
	15-19	203162	101393	101769		15-19	0.00190562	0.00349789		15-19	0.0134446					15-19	0.00484601	0.00474076	0.00495089
	20-24	157734	78938.6	78795.4		20-24	0.00644986	0.0082297		20-24	0.0401494					20-24	0.00862114	0.00778514	0.00945866
	25-29	126596	55830.8	70765		25-29	0.0082626	0.00848761		25-29	0.0747434					25-29	0.0139545	0.0127707	0.0148884
	30-34	120548	52731.5	67816.1		30-34	0.00820527	0.00719483		30-34	0.0947088					30-34	0.0163822	0.0165204	0.0162748
	35-39	91627.6	42966.3	48661.6		35-39	0.00711867	0.00581382		35-39	0.103447					35-39	0.0222943	0.0234531	0.0212711
	40-44	73310.8	31964.3	41346.5		40-44	0.00554387	0.00466341		40-44	0.0943221					40-44	0.0232129	0.0263967	0.0207516
	45-49	58392.3	25928.9	32463.5		45-49	0.0040755	0.0037266		45-49	0.0744265					45-49	0.0235437	0.0284004	0.0196646
	50-54	45698	20844.5	24853.7		50-54	0.00295943	0.00284804		50-54	0.050351					50-54	0.0240544	0.0280506	0.0207026
	55-59	35855	16948.1	18906.9		55-59	0.00232861	0.00202794		55-59	0.0376549					55-59	0.0259738	0.0290979	0.0231733
	60-64	27112.3	12595.5	14516.8		60-64	0.00213207	0.00141483		60-64	0.0293332					60-64	0.032164	0.0364299	0.0284627
	65-69	20204.8	9407.11	10797.7		65-69	0.00217972	0.00122653		65-69	0.0209828					65-69	0.0439758	0.0488244	0.0397516
	70-74	13982.9	6576.71	7406.21		70-74	0.00210055	0.00146866		70-74	0.0185786					70-74	0.0664267	0.0727156	0.060812
	75-79	8300.3	4002.03	4298.27		75-79	0.00140213	0.000348869		75-79	0.0167029					75-79	0.102753	0.111593	0.0944706
	80+	5275.67	2639.95	2635.72		80+	0	0		80+	0.00688061					80+	0.201436	0.215069	0.18778
	Total	1.91437e+06	928035	986336		Total	0.00323786	0.00346907		Total	0.032661					Total	0.0195342	0.0210367	0.0181203
	2008					2008				2008						2008
	0-4	382398	192962	189436		0-4	0.004747	0.00469631		0-4	0.014777					0-4	0.0419096	0.0461608	0.0375804
	5-9	309419	155035	154384		5-9	0	0		5-9	0.0101842					5-9	0.00757741	0.00817068	0.00698164
	10-14	262438	131234	131204		10-14	0	0		10-14	0.00532587					10-14	0.00389999	0.00410068	0.00369925
	15-19	212051	105817	106234		15-19	0.00174138	0.0031919		15-19	0.0123317					15-19	0.00468382	0.0046541	0.00471343
	20-24	165037	82528.8	82508.1		20-24	0.00585332	0.00747695		20-24	0.0371486					20-24	0.00830714	0.00757332	0.00904114
	25-29	128758	58537.8	70220.4		25-29	0.00750997	0.00772181		25-29	0.0710418					25-29	0.0132357	0.0120242	0.0142457
	30-34	121246	52792.8	68453		30-34	0.00745639	0.00654309		30-34	0.0935004					30-34	0.0154483	0.0156448	0.0152969
	35-39	95260.1	44219.6	51040.7		35-39	0.00647166	0.00528744		35-39	0.102641					35-39	0.0211122	0.0221838	0.0201836
	40-44	74755.7	32982.9	41772.8		40-44	0.00504253	0.00424304		40-44	0.0949798					40-44	0.0219866	0.0249602	0.0196387
	45-49	59885.8	26259.2	33626.6		45-49	0.00370949	0.00339234		45-49	0.0758833					45-49	0.0221717	0.0267707	0.0185803
	50-54	46909	21171.1	25738		50-54	0.00269546	0.00259001		50-54	0.051756					50-54	0.0225549	0.0265132	0.019299
	55-59	36769.5	17257.2	19512.3		55-59	0.00211415	0.00184713		55-59	0.0380229					55-59	0.0246977	0.0278667	0.021895
	60-64	27846	12944.9	14901.1		60-64	0.00194059	0.00129078		60-64	0.0296551					60-64	0.0310525	0.0352399	0.0274149
	65-69	20604.4	9528.5	11075.9		65-69	0.00197827	0.00112014		65-69	0.0213522					65-69	0.04295	0.0478049	0.0387531
	70-74	14262.2	6648.66	7613.8		70-74	0.00191534	0.00133147		70-74	0.0183971					70-74	0.0651726	0.0714932	0.0596805
	75-79	8529.5	4061.27	4468.23		75-79	0.00127512	0.000316846		75-79	0.0165887					75-79	0.101246	0.11024	0.0930708
	80+	5420.68	2666.23	2754.44		80+	0	0		80+	0.0074937					80+	0.199417	0.213033	0.186317
	Total	1.97159e+06	956647	1.01494e+06		Total	0.00307832	0.00327762		Total	0.0322039					Total	0.01872	0.0201861	0.0173378
	2009					2009				2009						2009
	0-4	393825	198771	195054		0-4	0.00432699	0.00428066		0-4	0.014708					0-4	0.0402388	0.0444363	0.0359614
	5-9	317635	159160	158475		5-9	0	0		5-9	0.0112163					5-9	0.00734566	0.00795053	0.00673818
	10-14	271017	135538	135479		10-14	0	0		10-14	0.00629901					10-14	0.00383078	0.00404277	0.00361868
	15-19	221077	110323	110754		15-19	0.00160552	0.00292482		15-19	0.0115764					15-19	0.00453291	0.00457709	0.00449091
	20-24	172650	86247	86403.4		20-24	0.0053589	0.00682139		20-24	0.0344774					20-24	0.00796532	0.0073553	0.00857424
	25-29	132162	61818.3	70343.4		25-29	0.00689239	0.00705544		25-29	0.0677686					25-29	0.0129218	0.0115518	0.0141258
	30-34	121113	52728.9	68383.7		30-34	0.00684484	0.00597838		30-34	0.0929056					30-34	0.0149871	0.0151906	0.0148335
	35-39	99405.3	45343.6	54061.8		35-39	0.00593648	0.0048257		35-39	0.102651					35-39	0.020662	0.021629	0.0198551
	40-44	76172.8	34221.4	41951.4		40-44	0.00463507	0.00387797		40-44	0.0964669					40-44	0.0215424	0.0243498	0.0192524
	45-49	61449.5	26585.5	34864		45-49	0.00340656	0.00310105		45-49	0.078139					45-49	0.0216329	0.026107	0.0182212
	50-54	48223.2	21558.6	26664.8		50-54	0.00247204	0.00237005		50-54	0.0540607					50-54	0.0218155	0.0257989	0.0185948
	55-59	37700.6	17523.4	20177.4		55-59	0.00194661	0.00168742		55-59	0.0390589					55-59	0.0239814	0.0272146	0.0211843
	60-64	28668.8	13353.7	15315.1		60-64	0.00177804	0.0011803		60-64	0.0303169					60-64	0.0303788	0.0344948	0.02679
	65-69	21037	9663.49	11373.5		65-69	0.00181232	0.00102313		65-69	0.0220935					65-69	0.0422256	0.0471141	0.0380525
	70-74	14560.7	6735.53	7825.19		70-74	0.001767	0.00122329		70-74	0.0184641					70-74	0.0641885	0.070505	0.0587515
	75-79	8742	4108.5	4633.72		75-79	0.00118315	0.000285387		75-79	0.0166956					75-79	0.0999312	0.109027	0.0918618
	80+	5595.31	2709	2886.31		80+	0	0		80+	0.00817985					80+	0.197611	0.211149	0.184905
	Total	2.03103e+06	986389	1.04465e+06		Total	0.00283018	0.00300058		Total	0.032054					Total	0.0181053	0.0195178	0.0167715
	2010					2010				2010						2010
	0-4	405618	204778	200840		0-4	0.00445531	0.00440633		0-4	0.0148906					0-4	0.038807	0.042887	0.034647
	5-9	326494	163630	162865		5-9	0	0		5-9	0.0122491					5-9	0.00712313	0.00771972	0.00652372
	10-14	279158	139607	139551		10-14	0	0		10-14	0.00741141					10-14	0.00376454	0.00397759	0.0035514
	15-19	230223	114900	115323		15-19	0.00170519	0.00275631		15-19	0.0111894					15-19	0.00441475	0.00451108	0.00431877
	20-24	180558	90104.9	90452.6		20-24	0.00566038	0.00640406		20-24	0.0319986					20-24	0.00765104	0.00713184	0.00816824
	25-29	136735	65653.5	71081.3		25-29	0.00729311	0.00662933		25-29	0.0645185					25-29	0.0131136	0.0113825	0.0147124
	30-34	120334	52531.7	67802.3		30-34	0.00724288	0.00561862		30-34	0.0920141					30-34	0.0151785	0.0153197	0.0150691
	35-39	103533	46302.9	57229.4		35-39	0.00626636	0.00452609		35-39	0.102569					35-39	0.0210948	0.0219602	0.0203947
	40-44	77714.8	35556	42158.8		40-44	0.00491227	0.00364707		40-44	0.0977185					40-44	0.0220322	0.0247826	0.0197125
	45-49	62977.9	26942.6	36035.4		45-49	0.00360289	0.00291078		45-49	0.0801689					45-49	0.0221194	0.0267035	0.0186921
	50-54	49579	21962	27617		50-54	0.00261284	0.00222597		50-54	0.0564485					50-54	0.0219872	0.0261669	0.0186634
	55-59	38654.4	17762.2	20892.2		55-59	0.00205303	0.00158411		55-59	0.0402505					55-59	0.0239198	0.0272375	0.0210885
	60-64	29541.5	13782.2	15759.3		60-64	0.00188231	0.00111006		60-64	0.0309177					60-64	0.0301977	0.0342949	0.0266145
	65-69	21510.7	9824.08	11686.7		65-69	0.0019164	0.000963368		65-69	0.0228562					65-69	0.0418237	0.0467521	0.0376808
	70-74	14875	6833.76	8041.47		70-74	0.00186058	0.00114029		70-74	0.0186068					70-74	0.0634162	0.0697523	0.0580577
	75-79	8946.48	4150.59	4795.88		75-79	0.00125405	0.000277228		75-79	0.0167242					75-79	0.0987427	0.107814	0.0908922
	80+	5789.54	2762.01	3027.52		80+	0	0		80+	0.00877998					80+	0.195983	0.209435	0.183711
	Total	2.09224e+06	1.01708e+06	1.07516e+06		Total	0.00298386	0.00290709		Total	0.0319898					Total	0.0177761	0.0190985	0.0165253
	2011					2011				2011						2011
	0-4	417801	210976	206825		0-4	0.00386424	0.00382215		0-4	0.0147991					0-4	0.0373305	0.0413896	0.033191
	5-9	336051	168455	167596		5-9	0	0		5-9	0.0132042					5-9	0.00690531	0.00751316	0.00629436
	10-14	286930	143494	143436		10-14	0	0		10-14	0.00861789					10-14	0.00370372	0.00392573	0.00348162
	15-19	239428	119507	119921		15-19	0.00153326	0.00254182		15-19	0.0111254					15-19	0.00431945	0.00446953	0.00416989
	20-24	188748	94100.3	94647.8		20-24	0.00505675	0.00588443		20-24	0.0297618					20-24	0.00729543	0.00692372	0.00766499
	25-29	142526	70066.3	72459.2		25-29	0.00651548	0.00609013		25-29	0.0614533					25-29	0.012959	0.0110154	0.0148384
	30-34	119229	52245.3	66984		30-34	0.00647119	0.00516498		30-34	0.0907147					30-34	0.01494	0.0149944	0.0148974
	35-39	107202	47149.4	60052.4		35-39	0.0055992	0.00415838		35-39	0.102572					35-39	0.0208153	0.0215613	0.020226
	40-44	79707.9	36889.2	42818.6		40-44	0.00440971	0.00335424		40-44	0.0988658					40-44	0.0218054	0.024364	0.0196012
	45-49	64445.1	27433	37012.1		45-49	0.0032193	0.00267499		45-49	0.0822834					45-49	0.0218992	0.0263722	0.0185839
	50-54	50957.6	22352.9	28604.7		50-54	0.00233799	0.00204829		50-54	0.0590222					50-54	0.0216547	0.0259185	0.0183227
	55-59	39673.7	18012.1	21661.5		55-59	0.00183852	0.00145755		55-59	0.0417685					55-59	0.0234625	0.0268843	0.0206172
	60-64	30433.6	14190.3	16243.3		60-64	0.00168396	0.00102173		60-64	0.0316064					60-64	0.0297297	0.033811	0.0261642
	65-69	22043.5	10029.2	12014.3		65-69	0.00172454	0.0008855		65-69	0.0237056					65-69	0.0412372	0.0461955	0.0370981
	70-74	15205.1	6938.89	8266.22		70-74	0.00166432	0.00105676		70-74	0.0188946					70-74	0.0625522	0.0689201	0.0572068
	75-79	9155.85	4196.93	4958.93		75-79	0.00112441	0.000246392		75-79	0.01676					75-79	0.0974577	0.106624	0.0897004
	80+	5992.46	2817.7	3174.76		80+	0	0		80+	0.00934375					80+	0.194514	0.208063	0.182488
	Total	2.15553e+06	1.04885e+06	1.10668e+06		Total	0.00266091	0.00264239		Total	0.0319251					Total	0.0172845	0.0185529	0.0160824
	2012					2012				2012						2012
	0-4	430196	217279	212917		0-4	0.00272198	0.00269241		0-4	0.0135185					0-4	0.0354818	0.0395165	0.0313646
	5-9	346551	173757	172794		5-9	0	0		5-9	0.013951					5-9	0.00666782	0.00728647	0.00604572
	10-14	294580	147325	147255		10-14	0	0		10-14	0.00991662					10-14	0.00363475	0.00386597	0.00340342
	15-19	248587	124083	124504		15-19	0.00142151	0.00237432		15-19	0.0113564					15-19	0.00424004	0.0044411	0.00404145
	20-24	197201	98232.4	98968.3		20-24	0.00466944	0.00548066		20-24	0.0278681					20-24	0.00691721	0.00671864	0.00711431
	25-29	149571	75069.8	74501.6		25-29	0.00601252	0.00567072		25-29	0.0585869					25-29	0.0126151	0.010658	0.0145871
	30-34	118114	51931	66182.5		30-34	0.00597135	0.0048099		30-34	0.0887848					30-34	0.0145681	0.0145962	0.0145461
	35-39	110072	47893.6	62178.7		35-39	0.00516368	0.00386962		35-39	0.102471					35-39	0.0203292	0.0211658	0.0196848
	40-44	82325	38140.5	44184.2		40-44	0.0040786	0.00312293		40-44	0.0997013					40-44	0.0214099	0.0239326	0.0192323
	45-49	65855.1	28119.5	37735.6		45-49	0.00297004	0.00248983		45-49	0.0843528					45-49	0.0215285	0.0260135	0.0181863
	50-54	52344.2	22715.8	29628.6		50-54	0.00215963	0.00190502		50-54	0.0615708					50-54	0.0212129	0.025632	0.0178173
	55-59	40785.8	18299.5	22486.4		55-59	0.00169798	0.00135733		55-59	0.043574					55-59	0.0229156	0.026523	0.0199798
	60-64	31327.7	14552	16775.7		60-64	0.00155442	0.000946378		60-64	0.0324079					60-64	0.0291798	0.0333226	0.0255862
	65-69	22646.5	10288.7	12357.8		65-69	0.00158389	0.000819559		65-69	0.0245438					65-69	0.0406114	0.0455933	0.0364636
	70-74	15553	7050.04	8502.99		70-74	0.00154449	0.00097402		70-74	0.0193308					70-74	0.0616685	0.0681179	0.0562949
	75-79	9379.27	4253.95	5125.32		75-79	0.00102961	0.00023866		75-79	0.0168307					75-79	0.0961575	0.105404	0.0884833
	80+	6198.27	2872.27	3326		80+	0	0		80+	0.00981679					80+	0.193086	0.206747	0.181289
	Total	2.22129e+06	1.08186e+06	1.13943e+06		Total	0.00230205	0.00230743		Total	0.0316273					Total	0.0166688	0.0179259	0.0154752
	2013					2013				2013						2013
	0-4	442451	223524	218928		0-4	0.00174475	0.00172617		0-4	0.0116859					0-4	0.0335435	0.0374468	0.0295583
	5-9	357620	179353	178267		5-9	0	0		5-9	0.0144826					5-9	0.00643215	0.00704046	0.00581887
	10-14	302359	151223	151137		10-14	0	0		10-14	0.0111427					10-14	0.00357807	0.00381052	0.00334696
	15-19	257442	128508	128934		15-19	0.00127418	0.00213451		15-19	0.0117445					15-19	0.00414611	0.00439392	0.00389912
	20-24	205858	102474	103384		20-24	0.00417074	0.00491583		20-24	0.0261163					20-24	0.00646508	0.0064927	0.00643771
	25-29	156454	78465.7	77987.9		25-29	0.00536061	0.00508357		25-29	0.0551412					25-29	0.011438	0.00998098	0.0129068
	30-34	120063	54464.3	65599.4		30-34	0.00532556	0.00431457		30-34	0.0854288					30-34	0.0133297	0.0135983	0.01311
	35-39	110791	47954.6	62836		35-39	0.00460606	0.00346796		35-39	0.101862					35-39	0.0184623	0.0198476	0.0174016
	40-44	85655.6	39290.1	46365.3		40-44	0.00363527	0.00279775		40-44	0.0999811					40-44	0.0196464	0.022433	0.0172851
	45-49	67203.2	29039.7	38163.5		45-49	0.00265166	0.00223324		45-49	0.0862775					45-49	0.019867	0.0245066	0.0163365
	50-54	53780.4	23042.8	30737.7		50-54	0.00192411	0.00171096		50-54	0.0638979					50-54	0.0198264	0.0245046	0.0163266
	55-59	42005.8	18641.6	23364.2		55-59	0.00151241	0.00121532		55-59	0.0456057					55-59	0.0216826	0.0255941	0.0185618
	60-64	32226.2	14861.9	17364.4		60-64	0.00138496	0.000852541		60-64	0.0333187					60-64	0.0280759	0.0323731	0.0243981
	65-69	23332.6	10609.3	12723.3		65-69	0.00141755	0.000734337		65-69	0.0253509					65-69	0.03957	0.0446147	0.035381
	70-74	15922.8	7166.98	8755.81		70-74	0.00136726	0.000876235		70-74	0.0199					70-74	0.0604323	0.0669443	0.0551019
	75-79	9620.05	4323.89	5296.16		75-79	0.000902706	0.000208977		75-79	0.0169221					75-79	0.094538	0.103802	0.0869748
	80+	6408.32	2926.62	3481.7		80+	0	0		80+	0.0102544					80+	0.191345	0.204962	0.179899
	Total	2.28919e+06	1.11587e+06	1.17333e+06		Total	0.00193328	0.00195035		Total	0.0311065					Total	0.0157165	0.017056	0.0144428
	2014					2014				2014						2014
	0-4	454614	229708	224906		0-4	0.000983401	0.000973063		0-4	0.0100963					0-4	0.0322919	0.0361381	0.0283636
	5-9	369263	185257	184007		5-9	0	0		5-9	0.0147811					5-9	0.00620401	0.00682213	0.0055817
	10-14	310536	155324	155213		10-14	0	0		10-14	0.0122031					10-14	0.00352187	0.00376153	0.00328203
	15-19	265858	132709	133148		15-19	0.0010101	0.00169442		15-19	0.0121949					15-19	0.00396795	0.00425146	0.00368706
	20-24	214697	106803	107894		20-24	0.00329885	0.00389274		20-24	0.0243006					20-24	0.00588041	0.00621077	0.00555339
	25-29	163964	82063.5	81900.4		25-29	0.00423105	0.0040238		25-29	0.0517383					25-29	0.00900269	0.00843055	0.009576
	30-34	123372	57632.8	65739.1		30-34	0.00420452	0.00341645		30-34	0.081966					30-34	0.0104861	0.0107946	0.0102157
	35-39	111098	48041.9	63056.8		35-39	0.00363682	0.00274463		35-39	0.10196					35-39	0.0139462	0.015189	0.0129993
	40-44	89745.6	40459.5	49286.1		40-44	0.00286921	0.00221397		40-44	0.101411					40-44	0.0150579	0.0171821	0.0133141
	45-49	68711.6	30253.2	38458.4		45-49	0.00209656	0.00176976		45-49	0.089806					45-49	0.0156251	0.0190398	0.0129331
	50-54	55375.7	23412.5	31963.2		50-54	0.00152226	0.00135343		50-54	0.0675295					50-54	0.0165803	0.0203691	0.0138051
	55-59	43367.6	19058.3	24309.1		55-59	0.00119858	0.000962691		55-59	0.0487742					55-59	0.0192298	0.0228022	0.0164292
	60-64	33173.4	15148.8	18024.6		60-64	0.00109498	0.000671731		60-64	0.0351371					60-64	0.0260188	0.0300838	0.0226146
	65-69	24110.6	10987	13123.8		65-69	0.00111526	0.000580195		65-69	0.0266556					65-69	0.0378681	0.0426347	0.033877
	70-74	16327.7	7298.4	9029.34		70-74	0.00109222	0.000694123		70-74	0.0209264					70-74	0.0587425	0.0651285	0.0535807
	75-79	9879.1	4405.86	5473.24		75-79	0.000720559	0.000160142		75-79	0.0174156					75-79	0.092555	0.101668	0.0852189
	80+	6627.05	2983.87	3643.19		80+	0	0		80+	0.0109437					80+	0.189365	0.202896	0.178283
	Total	2.36072e+06	1.15155e+06	1.20917e+06		Total	0.00146312	0.00148041		Total	0.0307868					Total	0.0143106	0.0156796	0.0130069
	2015					2015				2015						2015
	0-4	466688	235859	230830		0-4	0.000676898	0.000669976		0-4	0.0104481					0-4	0.0307877	0.0345241	0.0269709
	5-9	381197	191311	189886		5-9	0	0		5-9	0.0155218					5-9	0.00600102	0.00659807	0.00540066
	10-14	319353	159767	159586		10-14	0	0		10-14	0.0129969					10-14	0.00346509	0.00370433	0.00322559
	15-19	273843	136681	137163		15-19	0.000792577	0.00133169		15-19	0.0127869					15-19	0.00389129	0.00420942	0.00357428
	20-24	223653	111202	112451		20-24	0.00258399	0.00305319		20-24	0.0228862					20-24	0.00548659	0.00599109	0.0049857
	25-29	171946	85824.5	86121.2		25-29	0.00330696	0.00315525		25-29	0.0484324					25-29	0.00796817	0.00783272	0.00810058
	30-34	127984	61400.7	66583		30-34	0.00328669	0.00267821		30-34	0.07856					30-34	0.00947823	0.00986008	0.0091261
	35-39	111019	48088	62931.4		35-39	0.00284482	0.00215485		35-39	0.101818					35-39	0.0124514	0.0138867	0.0113546
	40-44	94107.2	41591.9	52515.2		40-44	0.00223789	0.00173207		40-44	0.103102					40-44	0.0136168	0.0157932	0.0118931
	45-49	70505.8	31643.8	38862		45-49	0.0016422	0.00138872		45-49	0.0933615					45-49	0.0144882	0.0177596	0.0118301
	50-54	57061.2	23868.9	33192.3		50-54	0.00119263	0.00106368		50-54	0.0716599					50-54	0.0156924	0.0194291	0.0130053
	55-59	44824.8	19517	25307.6		55-59	0.000933924	0.000756219		55-59	0.0524262					55-59	0.0184953	0.0221294	0.0157017
	60-64	34177.7	15427	18750.7		60-64	0.000855058	0.00052889		60-64	0.0373672					60-64	0.0252998	0.0294113	0.0219171
	65-69	24951.2	11390.6	13560.8		65-69	0.000878943	0.000459532		65-69	0.0281216					65-69	0.0371726	0.0419062	0.0331959
	70-74	16774.1	7453.87	9320.02		70-74	0.000851636	0.000548631		70-74	0.0221626					70-74	0.0578432	0.0641884	0.0527699
	75-79	10153.1	4496.74	5656.56		75-79	0.00057855	0.000134047		75-79	0.018051					75-79	0.0913738	0.100456	0.0841504
	80+	6854.47	3044.68	3809.8		80+	0	0		80+	0.0116513					80+	0.187924	0.201405	0.17721
	Total	2.43509e+06	1.18857e+06	1.24653e+06		Total	0.00113941	0.00115362		Total	0.0309904					Total	0.0135628	0.0149528	0.0122373
	2016					2016				2016						2016
	0-4	478003	241641	236362		0-4	0.000604963	0.000598411		0-4	0.0103287					0-4	0.0293502	0.0329873	0.0256318
	5-9	393865	197735	196130		5-9	0	0		5-9	0.0159307					5-9	0.0056802	0.00626882	0.00508677
	10-14	328890	164578	164312		10-14	0	0		10-14	0.0136468					10-14	0.00337206	0.00360957	0.00313417
	15-19	281476	140480	140996		15-19	0.000587308	0.000980934		15-19	0.0134004					15-19	0.00377549	0.00411619	0.00343603
	20-24	232646	115633	117013		20-24	0.00191301	0.00224778		20-24	0.0217508					20-24	0.00517397	0.00578658	0.00456858
	25-29	180274	89728.5	90545.7		25-29	0.00244332	0.00232107		25-29	0.0451927					25-29	0.00705022	0.00719651	0.00690524
	30-34	133896	65765.3	68131.1		30-34	0.00242955	0.00197051		30-34	0.0752288					30-34	0.00852235	0.00886361	0.00819621
	35-39	110707	48093.6	62613.8		35-39	0.00210136	0.00158526		35-39	0.101326					35-39	0.010897	0.0121761	0.00991452
	40-44	98242.2	42689.2	55553		40-44	0.00165361	0.00127495		40-44	0.105134					40-44	0.0120778	0.0139732	0.0106213
	45-49	72821.4	33095.4	39726		45-49	0.00122048	0.00102321		45-49	0.0970069					45-49	0.0131863	0.0160182	0.0108271
	50-54	58776.1	24487.7	34288.4		50-54	0.000879225	0.000782844		50-54	0.0763709					50-54	0.014757	0.0182013	0.0122972
	55-59	46342.1	19985.6	26356.5		55-59	0.000690723	0.000557659		55-59	0.0565135					55-59	0.0177071	0.0212315	0.0150346
	60-64	35265.8	15725.4	19540.1		60-64	0.000631687	0.000386842		60-64	0.0400534					60-64	0.0244939	0.0285415	0.0212482
	65-69	25825.5	11785.1	14040.6		65-69	0.000646972	0.000334323		65-69	0.0297964					65-69	0.0363627	0.0410138	0.0324582
	70-74	17275.3	7648.55	9626.73		70-74	0.000623397	0.00039919		70-74	0.0235602					70-74	0.0567969	0.0630206	0.0518522
	75-79	10442.4	4594.08	5848.12		75-79	0.000416528	9.05835e-05		75-79	0.0188574					75-79	0.0900151	0.0989576	0.0829556
	80+	7093.25	3111.5	3981.76		80+	0	0		80+	0.0124351					80+	0.186277	0.199513	0.175934
	Total	2.51184e+06	1.22678e+06	1.28506e+06		Total	0.000874059	0.000877558		Total	0.0310977					Total	0.0127957	0.0141447	0.0115079
	2017					2017				2017						2017
	0-4	488225	246859	241366		0-4	0.000497035	0.000491753		0-4	0.0103252					0-4	0.0282625	0.0318966	0.0245458
	5-9	407102	204450	202652		5-9	0	0		5-9	0.0160074					5-9	0.00539374	0.00597469	0.00480764
	10-14	339400	169881	169519		10-14	0	0		10-14	0.0140307					10-14	0.0032683	0.00351262	0.00302345
	15-19	289008	144236	144772		15-19	0.000486498	0.000809667		15-19	0.0140162					15-19	0.00364549	0.00399818	0.0032941
	20-24	241576	120038	121538		20-24	0.00158618	0.00185492		20-24	0.020909					20-24	0.0049071	0.00559651	0.00422621
	25-29	188850	93770.6	95079.9		25-29	0.00202373	0.00191355		25-29	0.0421152					25-29	0.00629837	0.00661075	0.00599027
	30-34	141157	70744.8	70412.4		30-34	0.00201171	0.00162584		30-34	0.0721008					30-34	0.00766109	0.00791859	0.00740237
	35-39	110415	48114.7	62300.1		35-39	0.00174108	0.00130778		35-39	0.10043					35-39	0.00946531	0.0103745	0.00875954
	40-44	101800	43763.4	58037		40-44	0.00136776	0.00105095		40-44	0.107554					40-44	0.010671	0.0121084	0.00958719
	45-49	75829.1	34544.3	41284.8		45-49	0.00101237	0.000842072		45-49	0.100814					45-49	0.0119319	0.0142244	0.0100137
	50-54	60517.5	25332.6	35184.9		50-54	0.000731662	0.000644247		50-54	0.0817861					50-54	0.0139055	0.0169524	0.0117117
	55-59	47904.7	20453.2	27451.5		55-59	0.000570918	0.000458875		55-59	0.0609822					55-59	0.0169808	0.0203433	0.0144836
	60-64	36458.1	16067.8	20390.6		60-64	0.000524671	0.000321471		60-64	0.0432402					60-64	0.0237601	0.0277115	0.020646
	65-69	26717.4	12148.4	14569.2		65-69	0.000539861	0.000279978		65-69	0.0317538					65-69	0.0356241	0.0402274	0.0317851
	70-74	17839.7	7890.01	9949.71		70-74	0.000516281	0.000327279		70-74	0.0251164					70-74	0.0558365	0.0619671	0.0509749
	75-79	10747.8	4697.43	6050.59		75-79	0.000344274	8.56742e-05		75-79	0.0199					75-79	0.0887424	0.0976813	0.0817994
	80+	7344.06	3184.34	4159.73		80+	0	0		80+	0.0132895					80+	0.184768	0.197957	0.174672
	Total	2.59089e+06	1.26618e+06	1.32472e+06		Total	0.000731398	0.000729514		Total	0.0312294					Total	0.0121308	0.0134257	0.010893
	2018	0	0	0		2018				2018	0					2018
	0-4	498213	251958	246255		0-4	0.00043514	0.000430396		0-4	0.0101928					0-4	0.0271796	0.0307693	0.0235067
	5-9	420313	211158	209156		5-9	0	0		5-9	0.0157334					5-9	0.00511504	0.00569628	0.00452823
	10-14	350509	175492	175017		10-14	0	0		10-14	0.0142936					10-14	0.003159	0.00340539	0.00291066
	15-19	296674	148061	148613		15-19	0.000408897	0.000676992		15-19	0.0144978					15-19	0.00363387	0.00406488	0.00320446
	20-24	250189	124296	125892		20-24	0.00133344	0.00155117		20-24	0.020433					20-24	0.00470969	0.0054442	0.0039845
	25-29	197525	97897.1	99627.9		25-29	0.00169847	0.00159774		25-29	0.0391495					25-29	0.00590786	0.0063594	0.00546418
	30-34	148313	74209.5	74103.7		30-34	0.00168851	0.00135869		30-34	0.0683979					30-34	0.0072599	0.00756689	0.00695248
	35-39	112914	50810.4	62103.4		35-39	0.00146118	0.00109367		35-39	0.0979453					35-39	0.00901518	0.00994687	0.00825287
	40-44	103328	44204.7	59123.4		40-44	0.00114935	0.000876936		40-44	0.109378					40-44	0.0102525	0.0117709	0.00911718
	45-49	79531.8	35923.8	43608		45-49	0.000851736	0.000703916		45-49	0.103986					45-49	0.011564	0.0139014	0.00963852
	50-54	62212.4	26413.8	35798.6		50-54	0.000610483	0.000538542		50-54	0.0871601					50-54	0.0136627	0.0167055	0.0114176
	55-59	49520.5	20899.3	28621.2		55-59	0.000480243	0.000384811		55-59	0.0653778					55-59	0.0166606	0.0201008	0.0141407
	60-64	37748	16460.9	21286.9		60-64	0.000438491	0.000267019		60-64	0.0466527					60-64	0.0233553	0.0274015	0.0202162
	65-69	27617.9	12470.5	15147.4		65-69	0.000451774	0.000229377		65-69	0.0338333					65-69	0.0351077	0.0398135	0.0312335
	70-74	18471.6	8180.02	10291.6		70-74	0.000432067	0.000281516		70-74	0.0266483					70-74	0.0550839	0.0612134	0.0502121
	75-79	11069.4	4804.57	6264.87		75-79	0.000301228	6.47131e-05		75-79	0.0210382					75-79	0.0876529	0.0967084	0.0807438
	80+	7606.68	3263.85	4343.04		80+	0	0		80+	0.0140995					80+	0.183367	0.196479	0.173505
	Total	2.67176e+06	1.3065e+06	1.36525e+06		Total	0.000624132	0.000618002		Total	0.0312009					Total	0.0116793	0.0129786	0.0104358
	2019	0	0	0		2019				2019	0					2019
	0-4	507720	256824	250896		0-4	0.00034441	0.000341155		0-4	0.00936664					0-4	0.0259573	0.0294447	0.0223866
	5-9	433373	217787	215586		5-9	0	0		5-9	0.0155725					5-9	0.00484371	0.00540426	0.00427744
	10-14	362272	181450	180822		10-14	0	0		10-14	0.0147758					10-14	0.00304536	0.00328744	0.00280244
	15-19	304754	152100	152655		15-19	0.000333057	0.000550253		15-19	0.0150234					15-19	0.00358065	0.00401259	0.00315172
	20-24	258336	128331	130005		20-24	0.00108832	0.0012614		20-24	0.0204739					20-24	0.00458358	0.00533205	0.00384475
	25-29	206207	102068	104139		25-29	0.00138545	0.00129758		25-29	0.0366114					25-29	0.0057369	0.00624358	0.00524031
	30-34	155837	77773.6	78063.2		30-34	0.00137776	0.00110501		30-34	0.0648051					30-34	0.00715668	0.00748647	0.00682811
	35-39	116390	53988.9	62400.8		35-39	0.00119024	0.000889832		35-39	0.0947901					35-39	0.00911528	0.0100461	0.00830992
	40-44	104080	44497.8	59582.7		40-44	0.000937501	0.000714382		40-44	0.110729					40-44	0.0103817	0.0120337	0.00914783
	45-49	83711.1	37192.1	46518.8		45-49	0.000691935	0.000571927		45-49	0.106893					45-49	0.0116998	0.0142059	0.0096914
	50-54	63871.1	27677.6	36193.5		50-54	0.000501164	0.000436258		50-54	0.092268					50-54	0.0137856	0.0169003	0.0113976
	55-59	51187.5	21336.6	29850.9		55-59	0.00038975	0.000313127		55-59	0.0699125					55-59	0.0165706	0.0201378	0.0140208
	60-64	39109.9	16893.7	22216.2		60-64	0.000360074	0.000219665		60-64	0.0503723					60-64	0.023123	0.0272929	0.0199621
	65-69	28534.3	12759.2	15774.9		65-69	0.000367847	0.000187473		65-69	0.0361374					65-69	0.034675	0.0394714	0.030796
	70-74	19164.8	8508.56	10656.3		70-74	0.000351903	0.000226981		70-74	0.0282141					70-74	0.0544049	0.060499	0.0495391
	75-79	11411.4	4919.28	6492.07		75-79	0.000236787	6.03357e-05		75-79	0.0222798					75-79	0.0865882	0.0956305	0.0797708
	80+	7881.54	3349.61	4532.15		80+	0	0		80+	0.0149268					80+	0.181975	0.194906	0.17236
	Total	2.75384e+06	1.34746e+06	1.40638e+06		Total	0.000512019	0.000503792		Total	0.0311292					Total	0.0113162	0.0125838	0.0101016
	2020	0	0	0		2020				2020						2020
	0-4	516954	261534	255420		0-4	0.00029398	0.000290889		0-4	0.00764096					0-4	0.0250964	0.0285892	0.0215191
	5-9	446053	224232	221821		5-9	0	0		5-9	0.0151465					5-9	0.0046311	0.00519229	0.00406382
	10-14	374350	187568	186783		10-14	0	0		10-14	0.0156295					10-14	0.00290069	0.00314578	0.00265456
	15-19	313491	156488	157003		15-19	0.000265419	0.000436922		15-19	0.0155658					15-19	0.00352562	0.00394135	0.00311126
	20-24	266038	132135	133903		20-24	0.000868681	0.00100315		20-24	0.0207975					20-24	0.00448856	0.00524597	0.00374281
	25-29	214876	106276	108600		25-29	0.00110449	0.00103171		25-29	0.0345877					25-29	0.00559149	0.0061158	0.00508044
	30-34	163664	81436.7	82226.9		30-34	0.00109831	0.000878773		30-34	0.0612794					30-34	0.0070145	0.00733026	0.00670448
	35-39	120916	57663.5	63252.8		35-39	0.000949967	0.000707797		35-39	0.0914173					35-39	0.009113	0.00988493	0.00840928
	40-44	104242	44657.1	59584.7		40-44	0.000747123	0.000567298		40-44	0.111528					40-44	0.010404	0.0120108	0.00919986
	45-49	88002.2	38349.2	49652.8		45-49	0.000550128	0.000454359		45-49	0.109737					45-49	0.0116962	0.0141838	0.00977503
	50-54	65691.4	29056.2	36635.2		50-54	0.00039991	0.000348105		50-54	0.0971969					50-54	0.0138139	0.0168651	0.011394
	55-59	52879.9	21824.8	31055.1		55-59	0.000314749	0.00024736		55-59	0.0748487					55-59	0.0164404	0.0200343	0.0139147
	60-64	40526.5	17347.7	23178.9		60-64	0.000285401	0.000175506		60-64	0.0544721					60-64	0.0228753	0.0271051	0.0197096
	65-69	29486.5	13032.7	16454		65-69	0.000290817	0.000148779		65-69	0.0387419					65-69	0.034235	0.0391215	0.0303642
	70-74	19902.1	8853.15	11048.9		70-74	0.000279108	0.000176217		70-74	0.0299004					70-74	0.0537661	0.0598802	0.0488469
	75-79	11781.1	5049.36	6731.74		75-79	0.000197857	4.18628e-05		75-79	0.0236334					75-79	0.0855911	0.0946667	0.0787837
	80+	8168.43	3440.27	4728.17		80+	0	0		80+	0.0157849					80+	0.180683	0.193655	0.171244
	Total	2.83702e+06	1.38894e+06	1.44808e+06		Total	0.000415763	0.000406671		Total	0.0309462					Total	0.0110179	0.0122541	0.00983216
	2021	0	0	0		2021				2021						2021
	0-4	527809	267059	260750		0-4	0.000243715	0.000241026		0-4	0.00602187					0-4	0.0251576	0.0286558	0.0215747
	5-9	457799	230211	227587		5-9	0	0		5-9	0.0138376					5-9	0.00460863	0.0051687	0.0040421
	10-14	387104	194023	193081		10-14	0	0		10-14	0.0161386					10-14	0.00283159	0.00307096	0.00258989
	15-19	322945	161244	161701		15-19	0.000238713	0.000391966		15-19	0.0156103					15-19	0.0035638	0.00397153	0.00315723
	20-24	273425	135790	137634		20-24	0.000781317	0.000900399		20-24	0.0207704					20-24	0.00450171	0.00526387	0.00374976
	25-29	223546	110516	113030		25-29	0.000993692	0.000925268		25-29	0.032201					25-29	0.00557391	0.00610087	0.0050567
	30-34	171758	85209.5	86548.4		30-34	0.000987625	0.000789142		30-34	0.0562586					30-34	0.00696405	0.00726971	0.00666312
	35-39	126586	61866.4	64719.1		35-39	0.000854486	0.000634795		35-39	0.0855315					35-39	0.0091958	0.00980385	0.00861799
	40-44	104041	44715.2	59326.1		40-44	0.000670834	0.000509584		40-44	0.108318					40-44	0.0105204	0.01204	0.00937513
	45-49	91984.4	39422	52562.5		45-49	0.000494154	0.000407251		45-49	0.109264					45-49	0.0118171	0.0142555	0.00998398
	50-54	67924.6	30448.3	37476.1		50-54	0.000359821	0.000314261		50-54	0.0988247					50-54	0.0139697	0.0169572	0.0115425
	55-59	54546	22435.8	32110.2		55-59	0.000280234	0.000220884		55-59	0.0779016					55-59	0.016563	0.0201539	0.014054
	60-64	41964.6	17793.2	24171.4		60-64	0.000259043	0.000156851		60-64	0.0572031					60-64	0.0229672	0.0272527	0.0198126
	65-69	30489.5	13311.4	17177.9		65-69	0.000263998	0.000132552		65-69	0.0404887					65-69	0.0342777	0.0392229	0.0304461
	70-74	20649.8	9181.25	11468.6		70-74	0.000259219	0.000163303		70-74	0.0308344					70-74	0.0538579	0.0600209	0.048924
	75-79	12177.6	5201.05	6976.76		75-79	0.00017145	4.07061e-05		75-79	0.024417					75-79	0.085603	0.0946467	0.0788902
	80+	8459.34	3531.81	4927.3		80+	0	0		80+	0.0162434					80+	0.18071	0.193744	0.171376
	Total	2.92321e+06	1.43196e+06	1.49125e+06		Total	0.000372904	0.00036297		Total	0.0299161					Total	0.0110148	0.0122192	0.00985822
	2022					2022				2022						2022
	0-4	540318	273410	266908		0-4	0.000220408	0.000218168		0-4	0.00488702					0-4	0.0252735	0.0287893	0.0216728
	5-9	468311	235571	232739		5-9	0	0		5-9	0.0128406					5-9	0.00459412	0.00515889	0.00402248
	10-14	400396	200756	199640		10-14	0	0		10-14	0.0158713					10-14	0.00275428	0.00298683	0.00252042
	15-19	333381	166500	166881		15-19	0.00022411	0.000367608		15-19	0.0154907					15-19	0.00356984	0.00396924	0.00317134
	20-24	280728	139413	141316		20-24	0.000734544	0.000844745		20-24	0.020851					20-24	0.00451709	0.00528367	0.00376084
	25-29	232147	114739	117408		25-29	0.000933846	0.000868134		25-29	0.0304595					25-29	0.00556793	0.00609763	0.00505028
	30-34	180043	89091.2	90951.6		30-34	0.000928134	0.000739623		30-34	0.051654					30-34	0.00688607	0.00720299	0.00657564
	35-39	133475	66617.6	66857.9		35-39	0.00080286	0.000595986		35-39	0.079986					35-39	0.00922344	0.0097065	0.00874542
	40-44	103735	44724.1	59010.9		40-44	0.000630301	0.000478825		40-44	0.104175					40-44	0.0105751	0.0119927	0.00950069
	45-49	95327.4	40417.6	54909.7		45-49	0.000465201	0.000380636		45-49	0.10851					45-49	0.0118934	0.0142846	0.0101292
	50-54	70725.8	31782.5	38943.1		50-54	0.000340811	0.000294011		50-54	0.0997215					50-54	0.0140589	0.0170093	0.0116511
	55-59	56178	23221.2	32956.8		55-59	0.000262102	0.000210004		55-59	0.0810583					55-59	0.0166845	0.0202396	0.0141796
	60-64	43410.2	18218.6	25191.8		60-64	0.000244815	0.000147589		60-64	0.0599039					60-64	0.0230336	0.0273743	0.0198943
	65-69	31559.6	13614.3	17945.3		65-69	0.000246103	0.000128968		65-69	0.0423886					65-69	0.0343012	0.0392991	0.0304971
	70-74	21395.6	9475.94	11919.7		70-74	0.000241046	0.000150582		70-74	0.0318516					70-74	0.0539274	0.0601288	0.0489788
	75-79	12606.8	5379.47	7227.35		75-79	0.000164935	3.96791e-05		75-79	0.0251894					75-79	0.0856391	0.0946131	0.0789595
	80+	8754.92	3624.25	5130.66		80+	0	0		80+	0.0167215					80+	0.18074	0.193842	0.171486
	Total	3.01249e+06	1.47656e+06	1.53594e+06		Total	0.000351278	0.000340466		Total	0.0289331					Total	0.0110181	0.012198	0.00988376
	2023					2023				2023						2023
	0-4	554858	280775	274083		0-4	0.000177962	0.00017645		0-4	0.00453875					0-4	0.0253803	0.0289092	0.0217653
	5-9	478359	240697	237663		5-9	0	0		5-9	0.011258					5-9	0.00456513	0.0051388	0.0039832
	10-14	413629	207466	206163		10-14	0	0		10-14	0.0154482					10-14	0.00267639	0.00289989	0.00245148
	15-19	344435	172078	172357		15-19	0.000209384	0.000342889		15-19	0.0155149					15-19	0.0035762	0.00396872	0.00318303
	20-24	288165	143103	145063		20-24	0.000686483	0.000789098		20-24	0.0207476					20-24	0.00453424	0.00530464	0.00377425
	25-29	240452	118834	121618		25-29	0.000873198	0.000810169		25-29	0.0293082					25-29	0.00557571	0.00610496	0.00505858
	30-34	188428	93057.2	95371.2		30-34	0.000867342	0.000690596		30-34	0.0475409					30-34	0.0067924	0.00713537	0.00645776
	35-39	140275	69928.4	70346.5		35-39	0.000751256	0.000556309		35-39	0.0744073					35-39	0.00917332	0.00956865	0.00878035
	40-44	106027	47248.5	58778.3		40-44	0.000590384	0.000446342		40-44	0.0989294					40-44	0.0106029	0.0118612	0.00958755
	45-49	96712.4	40800.1	55912.5		45-49	0.000433226	0.0003572		45-49	0.107334					45-49	0.0119395	0.0142872	0.0102224
	50-54	74144.3	33028.3	41115.7		50-54	0.000318148	0.000273543		50-54	0.100089					50-54	0.0140926	0.0170219	0.0117397
	55-59	57727	24202.8	33524.2		55-59	0.000248501	0.000196245		55-59	0.0841572					55-59	0.016804	0.0203022	0.0142785
	60-64	44883.2	18613.5	26269.4		60-64	0.000224348	0.000138349		60-64	0.0625199					60-64	0.0230767	0.0274756	0.01996
	65-69	32696	13951.5	18744.3		65-69	0.000229156	0.00011989		65-69	0.0444755					65-69	0.0343216	0.0393869	0.0305519
	70-74	22136.4	9732.09	12404.3		70-74	0.000224538	0.000138159		70-74	0.0329723					70-74	0.053964	0.0602627	0.0490402
	75-79	13072.3	5586.62	7485.95		75-79	0.000158661	3.87497e-05		75-79	0.0259618					75-79	0.0856734	0.0945736	0.0790288
	80+	9055.4	3717.14	5338.26		80+	0	0		80+	0.0172196					80+	0.180745	0.193912	0.171576
	Total	3.10506e+06	1.52282e+06	1.58224e+06		Total	0.000324998	0.000313976		Total	0.0280059					Total	0.0110213	0.0121812	0.00990495
	2024					2024				2024						2024
	0-4	571791	289341	282450		0-4	0.000158969	0.000157295		0-4	0.00446968					0-4	0.0253919	0.0289286	0.0217696
	5-9	487669	245438	242231		5-9	0	0		5-9	0.00919909					5-9	0.00453508	0.00512212	0.00394026
	10-14	426634	214059	212575		10-14	0	0		10-14	0.0152198					10-14	0.0026089	0.00282306	0.00239325
	15-19	356107	177981	178126		15-19	0.000194383	0.000319575		15-19	0.0156459					15-19	0.00356845	0.00395849	0.00317872
	20-24	296048	147028	149020		20-24	0.000639505	0.000735063		20-24	0.0207876					20-24	0.0045527	0.00532207	0.0037936
	25-29	248333	122725	125608		25-29	0.000813513	0.000754737		25-29	0.0286424					25-29	0.00558981	0.00612371	0.00506816
	30-34	196874	97089.7	99784		30-34	0.000807468	0.000643527		30-34	0.0439831					30-34	0.00669676	0.00707302	0.00632844
	35-39	147487	73357.1	74129.6		35-39	0.000700561	0.000518595		35-39	0.0691217					35-39	0.00906911	0.00942202	0.00871987
	40-44	109289	50262.4	59026.3		40-44	0.000548989	0.000417307		40-44	0.0932851					40-44	0.010588	0.011695	0.00964162
	45-49	97395.5	41063.6	56331.7		45-49	0.000405445	0.000331608		45-49	0.105676					45-49	0.0119358	0.0142443	0.0102531
	50-54	78034.5	34188.4	43846.1		50-54	0.000294134	0.000255878		50-54	0.100158					50-54	0.0140951	0.0170176	0.0118163
	55-59	59234.5	25349.5	33885		55-59	0.000227958	0.000182741		55-59	0.0868308					55-59	0.0169141	0.0203416	0.0143499
	60-64	46396	18999.1	27397		60-64	0.000210107	0.000129325		60-64	0.0651218					60-64	0.023102	0.0275628	0.0200085
	65-69	33883.9	14317.9	19566.2		65-69	0.000212867	0.000111245		65-69	0.0467139					65-69	0.0343411	0.039468	0.0306004
	70-74	22881.7	9958.62	12923.3		70-74	0.000209574	0.000134107		70-74	0.0342223					70-74	0.0539878	0.0603458	0.0490701
	75-79	13570.8	5814.93	7755.91		75-79	0.000135812	2.52498e-05		75-79	0.0267283					75-79	0.0857269	0.0946143	0.0790638
	80+	9362.78	3812.47	5550.54		80+	0	0		80+	0.0177714					80+	0.180758	0.193971	0.171676
	Total	3.20099e+06	1.57079e+06	1.6302e+06		Total	0.000303234	0.000292154		Total	0.0271387					Total	0.0110134	0.012158	0.00991069
	2025					2025				2025						2025
	0-4	591103	299112	291991		0-4	0.000123128	0.00012189		0-4	0.00432311					0-4	0.0253774	0.0289123	0.0217563
	5-9	496564	249948	246616		5-9	0	0		5-9	0.00726637					5-9	0.00450004	0.00509919	0.00389278
	10-14	439203	220440	218764		10-14	0	0		10-14	0.0145205					10-14	0.00258039	0.00278884	0.00237137
	15-19	368065	184029	184036		15-19	0.000180361	0.000296546		15-19	0.0163583					15-19	0.00344101	0.00382598	0.00305485
	20-24	304600	151312	153288		20-24	0.000593825	0.000683242		20-24	0.020801					20-24	0.00457186	0.00533923	0.00381584
	25-29	255818	126411	129407		25-29	0.000755448	0.000701408		25-29	0.0282814					25-29	0.00562479	0.00616192	0.00510009
	30-34	205352	101183	104170		30-34	0.000750145	0.000597304		30-34	0.0410531					30-34	0.00663612	0.00704447	0.00623948
	35-39	155067	76907.2	78159.7		35-39	0.00065039	0.000482406		35-39	0.0640806					35-39	0.00896478	0.00932306	0.00861509
	40-44	113596	53776	59819.7		40-44	0.000509654	0.00038761		40-44	0.0875447					40-44	0.0105944	0.0115812	0.00970736
	45-49	97559.9	41226.4	56333.5		45-49	0.000375273	0.000307899		45-49	0.103334					45-49	0.0119454	0.0142205	0.0102804
	50-54	82059.7	35265.1	46794.5		50-54	0.000272454	0.000235951		50-54	0.0998756					50-54	0.0141095	0.0170349	0.0119048
	55-59	60893.5	26602.9	34290.6		55-59	0.000216152	0.000169661		55-59	0.0889853					55-59	0.0170239	0.020388	0.0144141
	60-64	47924.3	19429.2	28495.1		60-64	0.000196192	0.000116674		60-64	0.067807					60-64	0.0231461	0.0276405	0.0200816
	65-69	35109.9	14698.6	20411.5		65-69	0.000196947	0.000102906		65-69	0.0490828					65-69	0.0343854	0.0395672	0.0306536
	70-74	23649.1	10170.2	13478.9		70-74	0.000195979	0.000122554		70-74	0.0356193					70-74	0.0539879	0.0604481	0.0491134
	75-79	14091	6049.48	8041.47		75-79	0.000131051	2.46688e-05		75-79	0.0274929					75-79	0.0857875	0.0946648	0.0791092
	80+	9681.97	3914.93	5767.04		80+	0	0		80+	0.0183064					80+	0.180735	0.193958	0.171759
	Total	3.30034e+06	1.62047e+06	1.67986e+06		Total	0.000278298	0.000267654		Total	0.026302					Total	0.0110095	0.0121419	0.00991712
	2026					2026				2026						2026
	0-4	610945	309151	301795		0-4	0.000108593	0.000107506		0-4	0.00422512					0-4	0.025349	0.0288819	0.0217293
	5-9	507000	255226	251774		5-9	0	0		5-9	0.00581949					5-9	0.00447419	0.00508015	0.00385993
	10-14	450846	226357	224489		10-14	0	0		10-14	0.0132821					10-14	0.00256464	0.00277301	0.00235553
	15-19	380704	190418	190286		15-19	0.000167436	0.000275223		15-19	0.0172514					15-19	0.00333146	0.00371515	0.0029475
	20-24	313861	155958	157903		20-24	0.000551202	0.000634224		20-24	0.0207446					20-24	0.00459523	0.00535586	0.00384256
	25-29	262994	129950	133044		25-29	0.000701457	0.000651507		25-29	0.028115					25-29	0.00567034	0.00621519	0.00513815
	30-34	213825	105304	108521		30-34	0.000695987	0.000554413		30-34	0.038727					30-34	0.00660652	0.00704163	0.00618431
	35-39	162951	80572.4	82378.4		35-39	0.000604223	0.000447895		35-39	0.0593443					35-39	0.00885637	0.00925004	0.00847132
	40-44	119017	57802.3	61214.3		40-44	0.000472743	0.00035912		40-44	0.0819591					40-44	0.0106059	0.0114989	0.00976275
	45-49	97411.1	41310.6	56100.7		45-49	0.000349858	0.00028772		45-49	0.100177					45-49	0.0119476	0.0141915	0.0102953
	50-54	85816	36274.8	49541.2		50-54	0.000252456	0.00022042		50-54	0.099306					50-54	0.0141356	0.0170704	0.0119867
	55-59	62952.8	27876.1	35076.7		55-59	0.000201265	0.000158253		55-59	0.0905026					55-59	0.0171039	0.0204396	0.0144593
	60-64	49429.4	19972.3	29457.3		60-64	0.000182645	0.000108697		60-64	0.0705915					60-64	0.0232164	0.0277143	0.0201667
	65-69	36357	15072.8	21284.4		65-69	0.000188501	9.48012e-05		65-69	0.0515123					65-69	0.0344312	0.0396932	0.0307045
	70-74	24459.6	10387.6	14071.8		70-74	0.000183499	0.000111665		70-74	0.0371518					70-74	0.0539746	0.0605125	0.0491492
	75-79	14618.4	6271.78	8346.63		75-79	0.00012679	2.40587e-05		75-79	0.0283099					75-79	0.0858767	0.0948254	0.0791524
	80+	10017.9	4029.87	5987.78		80+	0	0		80+	0.0189248					80+	0.1807	0.193843	0.171825
	Total	3.4032e+06	1.67193e+06	1.73127e+06		Total	0.000258374	0.000248157		Total	0.0255143					Total	0.0110102	0.0121333	0.00992551
	2027					2027				2027						2027
	0-4	631400	319500	311901		0-4	7.95626e-05	7.89173e-05		0-4	0.00414635					0-4	0.0253255	0.0288576	0.0217072
	5-9	519049	261304	257745		5-9	0	0		5-9	0.00483656					5-9	0.00446174	0.00507366	0.00384136
	10-14	461233	231644	229589		10-14	0	0		10-14	0.0123036					10-14	0.00255711	0.00276837	0.00234396
	15-19	393908	197097	196811		15-19	0.000155265	0.000255354		15-19	0.0174149					15-19	0.00326163	0.00364464	0.00287807
	20-24	324101	161101	163000		20-24	0.000511409	0.000589794		20-24	0.0205579					20-24	0.00461155	0.005366	0.00386589
	25-29	270093	133458	136635		25-29	0.000651068	0.000605237		25-29	0.0280368					25-29	0.0057118	0.00626715	0.00516937
	30-34	222215	109403	112812		30-34	0.000645604	0.000515488		30-34	0.0369803					30-34	0.00658961	0.00704858	0.00614453
	35-39	171049	84346.8	86702.1		35-39	0.000560362	0.000416601		35-39	0.0549894					35-39	0.00872617	0.0091715	0.00829037
	40-44	125623	62353.4	63269.7		40-44	0.000440306	0.000334236		40-44	0.0766814					40-44	0.0105784	0.0114098	0.00975891
	45-49	97180.8	41359.2	55821.6		45-49	0.000323333	0.000266055		45-49	0.0961739					45-49	0.0119049	0.0140995	0.0102789
	50-54	88985.2	37218.4	51766.8		50-54	0.000234693	0.000204068		50-54	0.0984716					50-54	0.0141403	0.0170685	0.012035
	55-59	65554.6	29101.4	36453.2		55-59	0.000186202	0.000145089		55-59	0.0913308					55-59	0.0171318	0.0204592	0.0144755
	60-64	50900.6	20672.6	30228		60-64	0.000169368	0.000101275		60-64	0.0734951					60-64	0.0233024	0.0277559	0.0202567
	65-69	37612.6	15430.3	22182.5		65-69	0.000172625	8.67863e-05		65-69	0.0539153					65-69	0.0344603	0.0397985	0.0307467
	70-74	25325.2	10624.4	14700.8		70-74	0.000162319	0.000108638		70-74	0.0388234					70-74	0.0539592	0.0605686	0.0491826
	75-79	15145.9	6470.46	8675.4		75-79	0.000107657	2.34119e-05		75-79	0.029177					75-79	0.0859303	0.0949775	0.0791825
	80+	10373.6	4159.73	6213.64		80+	0	0		80+	0.0195208					80+	0.180666	0.193735	0.171924
	Total	3.50975e+06	1.72524e+06	1.78451e+06		Total	0.000236752	0.000227268		Total	0.024764					Total	0.011014	0.0121304	0.00993471
	2028					2028				2028						2028
	0-4	652518	330183	322334		0-4	6.86521e-05	6.78955e-05		0-4	0.00408746					0-4	0.025307	0.0288393	0.0216887
	5-9	533022	268336	264686		5-9	0	0		5-9	0.00456706					5-9	0.00446596	0.00508015	0.0038433
	10-14	471150	236692	234458		10-14	0	0		10-14	0.0107523					10-14	0.00254064	0.00275827	0.00232093
	15-19	407070	203763	203307		15-19	0.000143388	0.000236869		15-19	0.017409					15-19	0.00320213	0.00358552	0.00281788
	20-24	334954	166564	168390		20-24	0.000473362	0.000547259		20-24	0.0205275					20-24	0.00462505	0.00537588	0.00388236
	25-29	277323	137030	140293		25-29	0.000603114	0.000562045		25-29	0.0277791					25-29	0.00574843	0.00631019	0.00519973
	30-34	230304	113370	116934		30-34	0.000597832	0.000477591		30-34	0.0357583					30-34	0.00658159	0.00706519	0.00611462
	35-39	179260	88202.7	91057.4		35-39	0.000518451	0.000386765		35-39	0.0510858					35-39	0.00858864	0.00909633	0.00809687
	40-44	132189	65555.1	66633.8		40-44	0.00040753	0.00031065		40-44	0.0714068					40-44	0.0104809	0.0112875	0.00969076
	45-49	99396.4	43775	55621.4		45-49	0.000300591	0.000247553		45-49	0.0912123					45-49	0.0118681	0.0139065	0.0102599
	50-54	90325.7	37596.6	52729.1		50-54	0.000218227	0.000188325		50-54	0.0972591					50-54	0.0141376	0.0170509	0.0120604
	55-59	68741.4	30249.4	38492		55-59	0.000171825	0.000136018		55-59	0.0916464					55-59	0.0171153	0.0204486	0.0144958
	60-64	52291.2	21547.3	30743.7		60-64	0.000155694	9.42127e-05		60-64	0.07635					60-64	0.0234069	0.027787	0.0203372
	65-69	38894.1	15762.4	23131.6		65-69	0.000156731	8.38797e-05		65-69	0.0562677					65-69	0.0344703	0.0398785	0.0307755
	70-74	26243.6	10887.7	15355.9		70-74	0.000151414	9.87396e-05		70-74	0.0406677					70-74	0.0539467	0.0606178	0.0492167
	75-79	15671.3	6642.87	9028.45		75-79	0.000104853	2.274e-05		75-79	0.0301624					75-79	0.0859628	0.0951279	0.0792194
	80+	10750.5	4304.29	6446.19		80+	0	0		80+	0.0201308					80+	0.180632	0.193593	0.171977
	Total	3.6201e+06	1.78046e+06	1.83964e+06		Total	0.000218991	0.00021028		Total	0.0240486					Total	0.0110165	0.0121278	0.00994088
	2029					2029				2029						2029
	0-4	674286	341197	333090		0-4	4.94115e-05	4.89169e-05		0-4	0.00402537					0-4	0.0252901	0.0288218	0.0216725
	5-9	549304	276527	272777		5-9	0	0		5-9	0.00456969					5-9	0.00446578	0.0050795	0.00384362
	10-14	480333	241355	238978		10-14	0	0		10-14	0.00869877					10-14	0.00252035	0.00274836	0.00229008
	15-19	419997	210308	209688		15-19	0.000132134	0.000218515		15-19	0.0175439					15-19	0.00315927	0.00354383	0.00277356
	20-24	346420	172346	174074		20-24	0.000436079	0.000505064		20-24	0.0206171					20-24	0.0046385	0.00538551	0.00389891
	25-29	284994	140838	144156		25-29	0.000555731	0.000518842		25-29	0.0276699					25-29	0.00578284	0.00635151	0.00522725
	30-34	237972	117135	120837		30-34	0.00055092	0.000441492		30-34	0.0349694					30-34	0.00657918	0.00708911	0.00608486
	35-39	187532	92121	95411.3		35-39	0.000477606	0.000356749		35-39	0.0476951					35-39	0.00845684	0.00902617	0.00790948
	40-44	139175	68871.3	70303.3		40-44	0.000375696	0.000287503		40-44	0.0664039					40-44	0.0103502	0.011158	0.00955564
	45-49	102534	46656	55878.2		45-49	0.000276284	0.000229036		45-49	0.0858865					45-49	0.0118156	0.0137162	0.0102247
	50-54	91016.4	37868.6	53147.8		50-54	0.000200172	0.000174856		50-54	0.0955851					50-54	0.0141062	0.0169931	0.0120492
	55-59	72374.1	31321.2	41052.9		55-59	0.000158854	0.000125694		55-59	0.091668					55-59	0.0170779	0.0204315	0.0145193
	60-64	53642.1	22569.7	31072.7		60-64	0.000146651	8.73008e-05		60-64	0.07885					60-64	0.0235067	0.0278112	0.0203871
	65-69	40211.6	16087.4	24124.2		65-69	0.000148086	7.61657e-05		65-69	0.0586336					65-69	0.0344654	0.0399452	0.0308111
	70-74	27202.3	11173.2	16029		70-74	0.000140939	8.93194e-05		70-74	0.042645					70-74	0.0539452	0.0606834	0.0492482
	75-79	16202.3	6795.67	9406.66		75-79	8.7891e-05	2.20705e-05		75-79	0.0312627					75-79	0.08595	0.0952506	0.0792309
	80+	11146.5	4459.32	6687.19		80+	0	0		80+	0.0207289					80+	0.180648	0.193556	0.172041
	Total	3.73434e+06	1.83763e+06	1.89671e+06		Total	0.000199705	0.000191979		Total	0.0233682					Total	0.0110173	0.0121256	0.00994345
	2030					2030				2030						2030
	0-4	696680	352526	344154		0-4	3.73111e-05	3.69119e-05		0-4	0.00397858					0-4	0.0252701	0.0288009	0.0216527
	5-9	567920	285895	282025		5-9	0	0		5-9	0.00458905					5-9	0.00446059	0.00507277	0.00384
	10-14	489109	245792	243317		10-14	0	0		10-14	0.0068054					10-14	0.00249562	0.00273227	0.00225657
	15-19	432489	216642	215846		15-19	0.000121073	0.000201148		15-19	0.0169807					15-19	0.00315351	0.0035379	0.0027677
	20-24	358165	178270	179895		20-24	0.000399645	0.000464412		20-24	0.0214399					20-24	0.00462632	0.00537274	0.00388665
	25-29	293326	144997	148329		25-29	0.000509234	0.00047708		25-29	0.0275561					25-29	0.00580159	0.00637674	0.00524087
	30-34	245253	120698	124554		30-34	0.00050525	0.000405137		30-34	0.0344646					30-34	0.00657187	0.00710868	0.0060517
	35-39	195825	96092.9	99732.6		35-39	0.000437687	0.000327471		35-39	0.0449017					35-39	0.00833529	0.00895442	0.00773875
	40-44	146539	72305.1	74234		40-44	0.000345379	0.000263576		40-44	0.0616776					40-44	0.0101766	0.0110162	0.00935872
	45-49	106665	50009.2	56656		45-49	0.000253321	0.000210366		45-49	0.0805124					45-49	0.011738	0.013518	0.0101669
	50-54	91228	38051.4	53176.6		50-54	0.00018359	0.000161289		50-54	0.0933363					50-54	0.0140393	0.016888	0.0120008
	55-59	76136.7	32318.9	43817.6		55-59	0.000143814	0.00011419		55-59	0.0913876					55-59	0.017021	0.0203866	0.0145386
	60-64	55133.8	23686.7	31446.9		60-64	0.000131232	8.06262e-05		60-64	0.0808954					60-64	0.0235777	0.0278068	0.0203924
	65-69	41540.9	16451.8	25089.3		65-69	0.000132675	6.8858e-05		65-69	0.0611014					65-69	0.034467	0.039981	0.030851
	70-74	28190.4	11469	16721.1		70-74	0.000130707	8.02735e-05		70-74	0.0447809					70-74	0.0539507	0.0607497	0.049288
	75-79	16750.9	6939.56	9811.39		75-79	8.63155e-05	2.14296e-05		75-79	0.0325034					75-79	0.0859008	0.0952977	0.0792544
	80+	11557.5	4618.36	6939.12		80+	0	0		80+	0.0213789					80+	0.180662	0.193595	0.172054
	Total	3.85251e+06	1.89676e+06	1.95575e+06		Total	0.000182067	0.000175242		Total	0.0227275					Total	0.0110124	0.0121182	0.00994001
	2031					2031				2031						2031
	0-4	719652	364148	355504		0-4	0.000113363	0.000112787		0-4	0.00393949					0-4	0.0252465	0.0287773	0.0216299
	5-9	587048	295520	291527		5-9	0	0		5-9	0.00460491					5-9	0.00445602	0.00506659	0.00383709
	10-14	499392	250980	248412		10-14	0	0		10-14	0.00541535					10-14	0.00247011	0.00271218	0.00222553
	15-19	444055	222512	221543		15-19	0.00036759	0.000611298		15-19	0.0157608					15-19	0.00316065	0.00354568	0.00277394
	20-24	370592	184534	186059		20-24	0.00120841	0.00140736		20-24	0.0224806					20-24	0.00460522	0.00535211	0.00386445
	25-29	302353	149510	152843		25-29	0.00154064	0.00144467		25-29	0.0274142					25-29	0.0058015	0.00638089	0.00523475
	30-34	252237	124122	128116		30-34	0.00152648	0.00122894		30-34	0.0341655					30-34	0.00654796	0.0071154	0.00599994
	35-39	204098	100087	104011		35-39	0.00132439	0.000991699		35-39	0.0427084					35-39	0.00821351	0.00887303	0.00757887
	40-44	154214	75850	78364.4		40-44	0.0010426	0.000799024		40-44	0.0573115					40-44	0.00997051	0.0108508	0.00911843
	45-49	111856	53845.5	58010.5		45-49	0.000763951	0.000640188		45-49	0.0753547					45-49	0.0116274	0.0133037	0.0100715
	50-54	91151.6	38165.5	52986.1		50-54	0.000560372	0.000491004		50-54	0.0904302					50-54	0.0139337	0.0167267	0.011922
	55-59	79651.8	33256.9	46394.9		55-59	0.000437046	0.000344255		55-59	0.0909088					55-59	0.0169549	0.020314	0.0145471
	60-64	56997.7	24822.7	32175		60-64	0.000400733	0.00024084		60-64	0.0824122					60-64	0.0235922	0.0277905	0.0203532
	65-69	42845.1	16913.3	25931.8		65-69	0.000408764	0.000203507		65-69	0.0637218					65-69	0.0344889	0.03997	0.0309139
	70-74	29194.9	11759.1	17435.9		70-74	0.000395832	0.000256136		70-74	0.0469917					70-74	0.0539483	0.0608236	0.0493114
	75-79	17331.9	7088.13	10243.7		75-79	0.00027923	6.83534e-05		75-79	0.0338875					75-79	0.0858233	0.0953114	0.0792581
	80+	11978.5	4774.05	7204.4		80+	0	0		80+	0.0220723					80+	0.180709	0.193767	0.172057
	Total	3.97465e+06	1.95789e+06	2.01676e+06		Total	0.000551787	0.000532136		Total	0.0221283					Total	0.0109994	0.0121019	0.00992909
	2032					2032				2032						2032
	0-4	743121	376020	367101		0-4	0.000105479	0.000104097		0-4	0.00388301					0-4	0.0252264	0.028756	0.0216105
	5-9	606756	305436	301320		5-9	0	0		5-9	0.00461593					5-9	0.00445261	0.00506253	0.0038351
	10-14	511265	256955	254310		10-14	0	0		10-14	0.00446592					10-14	0.002455	0.00270112	0.00220632
	15-19	454341	227739	226602		15-19	0.000347718	0.000578985		15-19	0.0147757					15-19	0.00315626	0.00354058	0.00277001
	20-24	383602	191096	192506		20-24	0.00114003	0.00133051		20-24	0.0228168					20-24	0.00456517	0.00531402	0.0038218
	25-29	312347	154514	157833		25-29	0.0014546	0.00136781		25-29	0.0272041					25-29	0.00578489	0.00636599	0.0052146
	30-34	259152	127516	131636		30-34	0.00144178	0.00116293		30-34	0.0339835					30-34	0.00651849	0.00711114	0.0059427
	35-39	212278	104055	108223		35-39	0.00124964	0.000938293		35-39	0.0410814					35-39	0.0081111	0.0088044	0.00744449
	40-44	162106	79499.7	82605.8		40-44	0.000986272	0.000758838		40-44	0.0533635					40-44	0.00976546	0.0106917	0.00887134
	45-49	118179	58175.2	60003.9		45-49	0.000726399	0.000606615		45-49	0.0705512					45-49	0.0115048	0.0131061	0.00994855
	50-54	91002.1	38250.8	52751.4		50-54	0.000527151	0.000464001		50-54	0.0868194					50-54	0.0138097	0.0165322	0.0118357
	55-59	82621.9	34135.6	48486.3		55-59	0.000415934	0.000332028		55-59	0.0902443					55-59	0.0168954	0.0202283	0.014549
	60-64	59366.4	25917.7	33448.7		60-64	0.000370605	0.000229271		60-64	0.0833245					60-64	0.0235476	0.0277594	0.0202841
	65-69	44112.7	17509.2	26603.5		65-69	0.000382637	0.000196629		65-69	0.0664924					65-69	0.034543	0.0399328	0.0309957
	70-74	30207.1	12035.7	18171.4		70-74	0.000362401	0.000227536		70-74	0.0492212					70-74	0.0539399	0.0609061	0.0493258
	75-79	17952.4	7250.06	10702.4		75-79	0.000230065	6.65039e-05		75-79	0.0354317					75-79	0.0857476	0.0953332	0.0792541
	80+	12407.2	4922.4	7484.84		80+	0	0		80+	0.0227905					80+	0.180748	0.193945	0.172068
	Total	4.10082e+06	2.02103e+06	2.07979e+06		Total	0.000521683	0.000503982		Total	0.0215672					Total	0.0109818	0.0120803	0.00991425
	2033					2033				2033						2033
	0-4	767000	388100	378900		0-4	9.79871e-05	9.65798e-05		0-4	0.00381435					0-4	0.0252011	0.0287305	0.0215865
	5-9	627098	315671	311426		5-9	0	0		5-9	0.00463937					5-9	0.00445062	0.00505928	0.00383366
	10-14	525035	263870	261165		10-14	0	0		10-14	0.00419534					10-14	0.00245383	0.00270124	0.00220385
	15-19	464139	232719	231421		15-19	0.000328403	0.000547132		15-19	0.0132438					15-19	0.0031381	0.0035213	0.00275276
	20-24	396578	197648	198930		20-24	0.00107396	0.00125609		20-24	0.023013					20-24	0.00452194	0.00527309	0.00377677
	25-29	322947	159832	163114		25-29	0.00136904	0.00129292		25-29	0.0271807					25-29	0.00575986	0.00634648	0.00518505
	30-34	266199	130977	135222		30-34	0.00135724	0.00109863		30-34	0.0336782					30-34	0.00648401	0.0070967	0.00589055
	35-39	220154	107891	112263		35-39	0.00117428	0.000885892		35-39	0.0399646					35-39	0.0080263	0.00874734	0.00733332
	40-44	170108	83226.6	86881.4		40-44	0.000928951	0.000715973		40-44	0.0498857					40-44	0.00957449	0.0105475	0.00864244
	45-49	124504	61248.6	63255.3		45-49	0.000681601	0.000571541		45-49	0.065852					45-49	0.0113247	0.0128921	0.00980693
	50-54	93125.1	40541.2	52583.9		50-54	0.000495978	0.000435194		50-54	0.0823889					50-54	0.0137365	0.0162739	0.0117802
	55-59	83891.5	34496.9	49394.6		55-59	0.000386719	0.000312631		55-59	0.0892942					55-59	0.0168601	0.0201585	0.014552
	60-64	62275.2	26945.5	35329.7		60-64	0.000356214	0.000219151		60-64	0.083779					60-64	0.0234742	0.0277174	0.0202381
	65-69	45303.3	18252.9	27050.4		65-69	0.000355491	0.000189935		65-69	0.0692669					65-69	0.0346333	0.0399043	0.0310766
	70-74	31241.7	12292.5	18949.4		70-74	0.000358867	0.000219864		70-74	0.0514473					70-74	0.0539145	0.0609564	0.0493459
	75-79	18609.5	7430.26	11179.3		75-79	0.000228037	6.47613e-05		75-79	0.0371384					75-79	0.0857003	0.0953295	0.0792803
	80+	12844.7	5062.95	7781.75		80+	0	0		80+	0.0236036					80+	0.180765	0.194149	0.172057
	Total	4.23105e+06	2.08621e+06	2.14485e+06		Total	0.000491934	0.000476333		Total	0.0210453					Total	0.0109608	0.0120545	0.00989694
	2034					2034				2034						2034
	0-4	791200	400343	390858		0-4	9.01756e-05	8.94441e-05		0-4	0.00371897					0-4	0.0251757	0.0287037	0.0215621
	5-9	648066	326222	321844		5-9	0	0		5-9	0.00463753					5-9	0.00444822	0.00505611	0.00383207
	10-14	541086	271930	269156		10-14	0	0		10-14	0.00421937					10-14	0.00244978	0.00269654	0.00220048
	15-19	473202	237312	235890		15-19	0.000308287	0.000516669		15-19	0.011207					15-19	0.00314108	0.00352354	0.00275631
	20-24	409311	204076	205235		20-24	0.00100823	0.00118389		20-24	0.0233441					20-24	0.00448304	0.00523578	0.00373454
	25-29	334154	165464	168689		25-29	0.00128626	0.00121878		25-29	0.0272998					25-29	0.00573133	0.0063243	0.00514969
	30-34	273678	134671	139006		30-34	0.00127578	0.00103494		30-34	0.0335584					30-34	0.00644193	0.00706909	0.00583432
	35-39	227618	111530	116088		35-39	0.00110426	0.000836016		35-39	0.0392743					35-39	0.00794216	0.00868761	0.00722597
	40-44	178166	87011.9	91154.3		40-44	0.000871694	0.000673449		40-44	0.0469271					40-44	0.00939399	0.0104009	0.00843036
	45-49	131243	64432	66811.3		45-49	0.000642124	0.000538409		45-49	0.0614596					45-49	0.0111216	0.0126735	0.009625
	50-54	96114.8	43265.8	52848.7		50-54	0.000467926	0.000412458		50-54	0.0776924					50-54	0.0136522	0.0160213	0.0117127
	55-59	84561.1	34763.1	49797.8		55-59	0.000368158	0.000293173		55-59	0.0879543					55-59	0.0168083	0.0200682	0.0145326
	60-64	65592.7	27906.6	37686.1		60-64	0.000329368	0.000201635		60-64	0.0839802					60-64	0.0233906	0.0276727	0.0202198
	65-69	46456.6	19120.7	27335.9		65-69	0.000347574	0.000183016		65-69	0.07175					65-69	0.0347276	0.0398756	0.0311186
	70-74	32306.9	12544.9	19762		70-74	0.000325566	0.000212091		70-74	0.0537098					70-74	0.0538813	0.0609908	0.049357
	75-79	19293.8	7625.16	11668.6		75-79	0.000226408	6.30867e-05		75-79	0.0390021					75-79	0.0856625	0.0953758	0.0793151
	80+	13295.3	5199.05	8096.04		80+	0	0		80+	0.0244919					80+	0.180737	0.194293	0.172036
	Total	4.36535e+06	2.15342e+06	2.21193e+06		Total	0.000462716	0.000449084		Total	0.020556					Total	0.0109373	0.0120254	0.00987795
	2035					2035				2035						2035
	0-4	815633	412702	402931		0-4	8.34485e-05	8.26754e-05		0-4	0.00360223					0-4	0.0251504	0.0286769	0.0215385
	5-9	669634	337074	332560		5-9	0	0		5-9	0.0046064					5-9	0.00444632	0.0050539	0.00383049
	10-14	559442	281151	278291		10-14	0	0		10-14	0.00426384					10-14	0.00244426	0.0026905	0.00219629
	15-19	481862	241683	240179		15-19	0.000289712	0.00048747		15-19	0.00936314					15-19	0.00312808	0.00350866	0.00274512
	20-24	421610	210292	211317		20-24	0.000947105	0.00111524		20-24	0.0228856					20-24	0.00446427	0.00521977	0.00371243
	25-29	345639	171236	174402		25-29	0.00120772	0.00114691		25-29	0.0282595					25-29	0.00567364	0.00627112	0.00508701
	30-34	281804	138709	143095		30-34	0.00119856	0.000973168		30-34	0.0334873					30-34	0.00639449	0.00703355	0.00577502
	35-39	234708	114976	119733		35-39	0.00103524	0.000785335		35-39	0.0388703					35-39	0.00786454	0.00863265	0.00712695
	40-44	186235	90846.4	95388.4		40-44	0.00081767	0.000634238		40-44	0.0445472					40-44	0.00923698	0.0102733	0.0082523
	45-49	138359	67728.6	70630.3		45-49	0.000605538	0.000509121		45-49	0.0573547					45-49	0.0109135	0.012471	0.0094231
	50-54	100038	46430.4	53608		50-54	0.000434746	0.00038862		50-54	0.0730021					50-54	0.0135665	0.0157977	0.0116341
	55-59	84790.3	34950.6	49839.7		55-59	0.000342399	0.000273469		55-59	0.086099					55-59	0.0167418	0.0199541	0.0144891
	60-64	69027.9	28803.1	40224.7		60-64	0.000317442	0.000195159		60-64	0.0839254					60-64	0.0233205	0.0276156	0.020245
	65-69	47735.4	20068	27667.4		65-69	0.000315764	0.00016347		65-69	0.0738513					65-69	0.0347912	0.039869	0.0311162
	70-74	33378.9	12829.6	20549.4		70-74	0.000322383	0.000204515		70-74	0.0561139					70-74	0.0538658	0.0609917	0.049406
	75-79	19997.7	7826.3	12171.4		75-79	0.000224962	6.14181e-05		75-79	0.0410015					75-79	0.0856436	0.0954292	0.0793514
	80+	13763.5	5333.58	8429.94		80+	0	0		80+	0.02547					80+	0.18069	0.194362	0.172039
	Total	4.50366e+06	2.22264e+06	2.28102e+06		Total	0.000434439	0.000422771		Total	0.0200991					Total	0.0109093	0.0119915	0.00985491
	2036					2036				2036						2036
	0-4	840281	425170	415110		0-4	7.64061e-05	7.62528e-05		0-4	0.00348138					0-4	0.0251255	0.0286501	0.0215161
	5-9	691756	348204	343551		5-9	0	0		5-9	0.00454813					5-9	0.00444452	0.00505164	0.00382854
	10-14	578300	290623	287677		10-14	0	0		10-14	0.00430294					10-14	0.00243966	0.00268482	0.00219199
	15-19	492010	246795	245215		15-19	0.00027252	0.000457461		15-19	0.00804831					15-19	0.00310295	0.00348201	0.00272144
	20-24	432994	216052	216942		20-24	0.000888116	0.00104938		20-24	0.0217271					20-24	0.00445236	0.0052095	0.00369832
	25-29	357802	177345	180458		25-29	0.00113279	0.00107855		25-29	0.0294718					25-29	0.00561212	0.00621715	0.00501753
	30-34	290607	143093	147514		30-34	0.0011237	0.000915307		30-34	0.0334238					30-34	0.00634795	0.00699396	0.0057213
	35-39	241514	118288	123226		35-39	0.000970035	0.000739505		35-39	0.0386727					35-39	0.00779417	0.008583	0.00703697
	40-44	194272	94699	99573.1		40-44	0.000763903	0.00059538		40-44	0.0427224					40-44	0.00910936	0.0101658	0.00810458
	45-49	145781	71131	74650.3		45-49	0.000565103	0.000476433		45-49	0.053587					45-49	0.0107154	0.0122909	0.00921403
	50-54	104960	50042.8	54917.1		50-54	0.000408233	0.000363867		50-54	0.0685317					50-54	0.0134907	0.0156187	0.0115515
	55-59	84756	35078.7	49677.3		55-59	0.000318868	0.000260691		55-59	0.08363					55-59	0.0166618	0.0198178	0.0144334
	60-64	72235.1	29647.1	42588		60-64	0.000289382	0.000183075		60-64	0.083678					60-64	0.0232718	0.0275582	0.0202826
	65-69	49348.3	21031.2	28317.3		65-69	0.000293508	0.000155212		65-69	0.0754634					65-69	0.0348006	0.0398543	0.0310391
	70-74	34424.9	13192.4	21232.5		70-74	0.000290434	0.000179407		70-74	0.058674					70-74	0.0538919	0.0609519	0.0495054
	75-79	20713.3	8022.32	12691		75-79	0.00017884	5.97074e-05		75-79	0.0430978					75-79	0.085631	0.0954853	0.0793843
	80+	14255.3	5470.35	8784.99		80+	0	0		80+	0.0265448					80+	0.180612	0.19443	0.172008
	Total	4.64601e+06	2.29388e+06	2.35212e+06		Total	0.000407328	0.00039737		Total	0.0196749					Total	0.0108801	0.0119564	0.00983048
	2037					2037				2037						2037
	0-4	865175	437763	427411		0-4	7.10012e-05	7.01531e-05		0-4	0.0033719					0-4	0.0251054	0.0286278	0.0214977
	5-9	714356	359576	354780		5-9	0	0		5-9	0.00445449					5-9	0.00444204	0.00504984	0.00382602
	10-14	597729	300381	297348		10-14	0	0		10-14	0.00433375					10-14	0.00243601	0.00267991	0.00218961
	15-19	503736	252688	251048		15-19	0.000254482	0.000429027		15-19	0.00713976					15-19	0.00308201	0.00345987	0.00270258
	20-24	443102	221173	221930		20-24	0.000832862	0.000985381		20-24	0.0207645					20-24	0.00444478	0.00520368	0.00368847
	25-29	370555	183752	186803		25-29	0.00106081	0.00101304		25-29	0.030058					25-29	0.00553498	0.00614582	0.00493532
	30-34	300354	147956	152399		30-34	0.00105172	0.000859988		30-34	0.0333286					30-34	0.00630064	0.00695077	0.00566946
	35-39	248255	121575	126680		35-39	0.000909506	0.000692994		35-39	0.0385962					35-39	0.0077288	0.00853783	0.00695237
	40-44	202208	98522.8	103685		40-44	0.000716113	0.000559919		40-44	0.041415					40-44	0.00900742	0.0100788	0.00798727
	45-49	153413	74632.1	78780.9		45-49	0.000530264	0.000449202		45-49	0.050195					45-49	0.0105337	0.0121322	0.00901933
	50-54	110949	54111.4	56837.6		50-54	0.000382396	0.000344738		50-54	0.0643824					50-54	0.0134189	0.0154817	0.0114551
	55-59	84658	35183.8	49474.1		55-59	0.000304058	0.000246328		55-59	0.0804964					55-59	0.0165654	0.0196509	0.0143666
	60-64	74943	30438.5	44504.5		60-64	0.000275413	0.000172172		60-64	0.0832585					60-64	0.0232423	0.0275076	0.0203301
	65-69	51412	21959.8	29452.2		65-69	0.000289395	0.000147745		65-69	0.0765049					65-69	0.0347424	0.0398527	0.0309321
	70-74	35434	13661.3	21772.7		70-74	0.000259057	0.000173348		70-74	0.0613705					70-74	0.0539728	0.0608818	0.0496276
	75-79	21434.6	8208.53	13226		75-79	0.000177344	2.89236e-05		75-79	0.0452309					75-79	0.0856074	0.0955986	0.0794065
	80+	14772.5	5611.79	9160.76		80+	0	0		80+	0.0277565					80+	0.180531	0.194451	0.172004
	Total	4.79249e+06	2.36719e+06	2.42529e+06		Total	0.000381691	0.000373205		Total	0.0192824					Total	0.0108514	0.0119219	0.00980658
	2038					2038				2038						2038
	0-4	890370	450509	439861		0-4	6.52371e-05	6.43555e-05		0-4	0.00328103					0-4	0.02509	0.0286114	0.0214833
	5-9	737346	371143	366203		5-9	0	0		5-9	0.00432942					5-9	0.00443948	0.0050479	0.00382285
	10-14	617780	310451	307330		10-14	0	0		10-14	0.00436974					10-14	0.00243338	0.00267621	0.00218735
	15-19	517337	259510	257827		15-19	0.000237808	0.000402059		15-19	0.00686484					15-19	0.00307246	0.00344874	0.00269371
	20-24	452724	226047	226677		20-24	0.00078106	0.000926855		20-24	0.0192761					20-24	0.00442904	0.00518805	0.00367215
	25-29	383282	190153	193129		25-29	0.000994744	0.000951761		25-29	0.0305171					25-29	0.0054622	0.00607717	0.00485671
	30-34	310692	153125	157568		30-34	0.000985585	0.000808102		30-34	0.0334286					30-34	0.0062566	0.00691106	0.00562061
	35-39	255122	124927	130195		35-39	0.000852065	0.000651194		35-39	0.0384188					35-39	0.00766656	0.008487	0.00687931
	40-44	209843	102217	107626		40-44	0.000670328	0.000524693		40-44	0.0405661					40-44	0.00892383	0.0100087	0.00789349
	45-49	161149	78204.7	82944.4		45-49	0.000495636	0.000421339		45-49	0.0472206					45-49	0.0103735	0.0119967	0.00884319
	50-54	116976	57020.7	59954.9		50-54	0.000361422	0.000324761		50-54	0.0603094					50-54	0.0132893	0.0153207	0.0113573
	55-59	86643.3	37317.7	49325.6		55-59	0.000282601	0.000231006		55-59	0.0765778					55-59	0.0165329	0.0194285	0.0143466
	60-64	76093.9	30763.7	45330.2		60-64	0.000262305	0.000161704		60-64	0.0825554					60-64	0.0232684	0.027492	0.0203971
	65-69	53953.1	22832.3	31120.8		65-69	0.000267008	0.000141237		65-69	0.0771081					65-69	0.0346584	0.0398517	0.0308554
	70-74	36373.3	14245.5	22128		70-74	0.000255646	0.000167437		70-74	0.0640875					70-74	0.0540977	0.060824	0.0497569
	75-79	22173.6	8381.38	13792.3		75-79	0.000175563	2.79408e-05		75-79	0.047365					75-79	0.0855668	0.0956734	0.0794251
	80+	15312.3	5759.25	9552.78		80+	0	0		80+	0.0290853					80+	0.180467	0.194462	0.172033
	Total	4.94317e+06	2.44261e+06	2.50056e+06		Total	0.000357566	0.00035033		Total	0.0189205					Total	0.0108238	0.0118887	0.00978343
	2039					2039				2039						2039
	0-4	915967	463459	452508		0-4	5.97543e-05	5.94547e-05		0-4	0.00320368					0-4	0.0250785	0.0285992	0.0214725
	5-9	760643	382865	377779		5-9	0	0		5-9	0.00418575					5-9	0.00443645	0.00504578	0.00381951
	10-14	638450	320832	317618		10-14	0	0		10-14	0.00438064					10-14	0.00243066	0.00267293	0.00218523
	15-19	533200	267464	265736		15-19	0.000222432	0.000377547		15-19	0.00691717					15-19	0.00306292	0.00343862	0.00268479
	20-24	461617	230540	231077		20-24	0.000733297	0.000870531		20-24	0.017287					20-24	0.00441079	0.00517004	0.00365331
	25-29	395766	196430	199337		25-29	0.000931988	0.000893606		25-29	0.031101					25-29	0.00540246	0.00602358	0.00479039
	30-34	321625	158600	163025		30-34	0.000924045	0.000758736		30-34	0.0336582					30-34	0.00622123	0.00687892	0.00558139
	35-39	262403	128505	133898		35-39	0.000798878	0.000611135		35-39	0.0384236					35-39	0.00760917	0.00843965	0.0068138
	40-44	217075	105719	111356		40-44	0.000628051	0.000491634		40-44	0.0400935					40-44	0.00885433	0.00995106	0.00781313
	45-49	168932	81829.8	87102.6		45-49	0.000466606	0.00039445		45-49	0.0447001					45-49	0.0102358	0.0118789	0.00869209
	50-54	123403	60032.8	63369.7		50-54	0.000337896	0.000303277		50-54	0.0564951					50-54	0.0131531	0.0151716	0.0112409
	55-59	89432.9	39849.6	49583.1		55-59	0.00026324	0.000215545		55-59	0.0724128					55-59	0.0164978	0.019217	0.0143125
	60-64	76705.6	31007.2	45698.4		60-64	0.00023971	0.000151205		60-64	0.081479					60-64	0.0232716	0.0274557	0.0204326
	65-69	56849.8	23648.9	33201		65-69	0.000246949	0.000125433		65-69	0.0774545					65-69	0.0345811	0.0398414	0.0308343
	70-74	37279.8	14924.9	22355.2		70-74	0.000249802	0.000161304		70-74	0.0665312					70-74	0.0542281	0.0608014	0.0498391
	75-79	22935.2	8552.22	14383		75-79	0.000173733	2.6949e-05		75-79	0.049524					75-79	0.0855128	0.0957156	0.0794462
	80+	15870.2	5912.05	9958.18		80+	0	0		80+	0.030522					80+	0.180438	0.194484	0.172098
	Total	5.09815e+06	2.52017e+06	2.57798e+06		Total	0.000334978	0.000328679		Total	0.0185869					Total	0.010798	0.0118581	0.00976161
	2040					2040				2040						2040
	0-4	942097	476678	465419		0-4	5.51221e-05	5.41901e-05		0-4	0.00313734					0-4	0.0250688	0.0285893	0.0214631
	5-9	784168	394701	389468		5-9	0	0		5-9	0.0040391					5-9	0.00443317	0.00504289	0.00381526
	10-14	659710	331509	328200		10-14	0	0		10-14	0.00435868					10-14	0.00242829	0.00267083	0.00218399
	15-19	551334	276560	274774		15-19	0.00020823	0.000354231		15-19	0.0069999					15-19	0.0030543	0.00343022	0.00267593
	20-24	470118	234817	235301		20-24	0.000686848	0.000816182		20-24	0.0155142					20-24	0.00439025	0.00514984	0.00363222
	25-29	407821	202498	205323		25-29	0.000873805	0.000838405		25-29	0.0307759					25-29	0.00536839	0.00599597	0.00474944
	30-34	332827	164211	168617		30-34	0.000866238	0.000712696		30-34	0.0348209					30-34	0.00618115	0.00684056	0.00553896
	35-39	270308	132413	137894		35-39	0.000749292	0.000574349		35-39	0.0384838					35-39	0.00755558	0.00839241	0.00675202
	40-44	223941	109033	114907		40-44	0.000588049	0.000462376		40-44	0.0398677					40-44	0.00879472	0.00990392	0.00774415
	45-49	176715	85497.7	91216.9		45-49	0.000436096	0.00037144		45-49	0.0426929					45-49	0.0101241	0.011781	0.00857109
	50-54	130192	63150.1	67042.1		50-54	0.000318618	0.000286397		50-54	0.0529138					50-54	0.013013	0.01504	0.0111036
	55-59	93089.5	42782.9	50306.3		55-59	0.000244846	0.000199796		55-59	0.0682438					55-59	0.0164648	0.01905	0.0142662
	60-64	76925.2	31184.5	45740.7		60-64	0.000228495	0.000140589		60-64	0.0799075					60-64	0.0232486	0.0273853	0.0204235
	65-69	59844.6	24411.3	35433.3		65-69	0.000228991	0.000121448		65-69	0.0775458					65-69	0.0345292	0.0398197	0.0308844
	70-74	38292.4	15664.2	22628		70-74	0.000215041	0.000139618		70-74	0.0686185					70-74	0.0543182	0.0608043	0.0498287
	75-79	23699.4	8746.9	14952.3		75-79	0.000129027	2.59869e-05		75-79	0.0518471					75-79	0.0854903	0.0956989	0.0795197
	80+	16445.1	6065.96	10379.2		80+	0	0		80+	0.0321049					80+	0.180414	0.19458	0.172136
	Total	5.25753e+06	2.59992e+06	2.6576e+06		Total	0.000313838	0.000308083		Total	0.0182797					Total	0.0107743	0.0118303	0.00974115
	2041					2041				2041						2041
	0-4	968876	490225	478651		0-4	5.01373e-05	4.97573e-05		0-4	0.0030805					0-4	0.0250608	0.0285807	0.0214557
	5-9	807902	406642	401260		5-9	0	0		5-9	0.00389872					5-9	0.00443004	0.00504051	0.00381138
	10-14	681515	342460	339055		10-14	0	0		10-14	0.00430728					10-14	0.00242675	0.00266868	0.0021824
	15-19	569961	285903	284058		15-19	0.000195811	0.000332249		15-19	0.00707483					15-19	0.0030471	0.00342253	0.00266923
	20-24	480086	239823	240263		20-24	0.000644588	0.000764958		20-24	0.0142697					20-24	0.00436777	0.00512687	0.00361006
	25-29	418980	208120	210860		25-29	0.000818821	0.000784853		25-29	0.0297148					25-29	0.0053445	0.00597849	0.00471875
	30-34	344695	170149	174546		30-34	0.000812161	0.000666929		30-34	0.0362339					30-34	0.00614604	0.00680864	0.0055014
	35-39	278863	136655	142207		35-39	0.000703272	0.000538772		35-39	0.0385623					35-39	0.0075059	0.00834704	0.00669761
	40-44	230530	112219	118311		40-44	0.000551554	0.000433655		40-44	0.039825					40-44	0.00874236	0.00986094	0.00768137
	45-49	184456	89178.8	95277.5		45-49	0.00040746	0.000346153		45-49	0.0411769					45-49	0.0100349	0.0117043	0.00847232
	50-54	137276	66365.2	70911.2		50-54	0.000299486	0.000265751		50-54	0.0496193					50-54	0.0128769	0.0149222	0.0109626
	55-59	97671.5	46123.4	51547.9		55-59	0.000233281	0.000190022		55-59	0.0642646					55-59	0.0164404	0.0189308	0.0142077
	60-64	76914.7	31313.4	45601.3		60-64	0.00020915	0.000129726		60-64	0.0777518					60-64	0.0231939	0.0272796	0.0203882
	65-69	62634.2	25129.9	37504.4		65-69	0.000217109	0.000119365		65-69	0.0774488					65-69	0.0345134	0.0397979	0.0309785
	70-74	39585.9	16414.4	23171.3		70-74	0.000199542	0.000132498		70-74	0.0702427					70-74	0.0543158	0.0608343	0.0496986
	75-79	24438.7	8997.26	15441.4		75-79	0.000127885	2.50792e-05		75-79	0.054321					75-79	0.0855382	0.0956106	0.0796694
	80+	17035.8	6216.98	10818.9		80+	0	0		80+	0.033762					80+	0.180395	0.19469	0.172181
	Total	5.42142e+06	2.68194e+06	2.73948e+06		Total	0.000294061	0.000288492		Total	0.0179965					Total	0.0107532	0.0118062	0.00972237
	2042					2042				2042						2042
	0-4	996397	504149	492248		0-4	4.59451e-05	4.5533e-05		0-4	0.00303358					0-4	0.0250567	0.0285765	0.0214517
	5-9	831870	418701	413169		5-9	0	0		5-9	0.00377627					5-9	0.00442691	0.00503791	0.00380772
	10-14	703792	353648	350144		10-14	0	0		10-14	0.0042206					10-14	0.00242495	0.00266676	0.00218008
	15-19	589148	295525	293623		15-19	0.00018405	0.00031144		15-19	0.00713595					15-19	0.00304238	0.00341812	0.00266421
	20-24	491608	245597	246011		20-24	0.000604134	0.000716839		20-24	0.0134012					20-24	0.00435103	0.00511064	0.0035927
	25-29	428878	213113	215765		25-29	0.000768528	0.000735851		25-29	0.0287973					25-29	0.0053271	0.00596698	0.00469508
	30-34	357149	176384	180764		30-34	0.000762367	0.000625402		30-34	0.0370686					30-34	0.00610324	0.00676749	0.00545508
	35-39	288331	141360	146971		35-39	0.000659808	0.000503683		35-39	0.0386217					35-39	0.00745796	0.00830087	0.00664724
	40-44	237055	115380	121675		40-44	0.000517705	0.000404937		40-44	0.0398922					40-44	0.00869434	0.00982245	0.00762643
	45-49	192091	92828.9	99262.3		45-49	0.000383442	0.000324633		45-49	0.0401226					45-49	0.00996534	0.0116424	0.00839699
	50-54	144560	69671.1	74888.2		50-54	0.000280997	0.000250287		50-54	0.0466466					50-54	0.0127504	0.0148216	0.0108236
	55-59	103244	49876	53368.4		55-59	0.000215603	0.000180018		55-59	0.060566					55-59	0.0164224	0.0188731	0.0141279
	60-64	76855.3	31427.5	45428		60-64	0.000199437	0.000126168		60-64	0.0749671					60-64	0.0231046	0.027131	0.0203238
	65-69	64983.1	25803.9	39179.2		65-69	0.000206642	0.000108057		65-69	0.0771806					65-69	0.0345273	0.0397683	0.0310755
	70-74	41255.8	17137.4	24118.4		70-74	0.000207335	0.000126111		70-74	0.071332					70-74	0.0542337	0.0608672	0.0495202
	75-79	25144.4	9321.58	15823		75-79	0.000126743	2.42346e-05		75-79	0.0569236					75-79	0.0856624	0.09551	0.0798598
	80+	17640.8	6363.99	11276.8		80+	0	0		80+	0.035443					80+	0.180371	0.194813	0.17222
	Total	5.59e+06	2.76629e+06	2.82372e+06		Total	0.000275663	0.000270156		Total	0.0177358					Total	0.0107349	0.0117857	0.00970537
	2043					2043				2043						2043
	0-4	1.02477e+06	518504	506268		0-4	4.19493e-05	4.20535e-05		0-4	0.00299654					0-4	0.0250565	0.028577	0.0214508
	5-9	856123	430903	425219		5-9	0	0		5-9	0.00367605					5-9	0.00442456	0.00503585	0.00380511
	10-14	726452	365028	361424		10-14	0	0		10-14	0.00410161					10-14	0.00242289	0.00266539	0.00217798
	15-19	608949	305455	303495		15-19	0.000172895	0.000291711		15-19	0.00719712					15-19	0.00303856	0.0034142	0.00266049
	20-24	504971	252279	252692		20-24	0.000566458	0.000671611		20-24	0.0131313					20-24	0.00434308	0.00510418	0.00358322
	25-29	438293	217861	220432		25-29	0.000722555	0.000689752		25-29	0.0273602					25-29	0.00530211	0.00594633	0.00466541
	30-34	369578	182614	186965		30-34	0.000716583	0.000586263		30-34	0.0377645					30-34	0.00606432	0.00673058	0.00541356
	35-39	298367	146358	152008		35-39	0.000619542	0.00047342		35-39	0.0388624					35-39	0.00741539	0.00826088	0.00660133
	40-44	243701	118604	125096		40-44	0.000485599	0.000380002		40-44	0.0398599					40-44	0.0086483	0.00978081	0.00757456
	45-49	199431	96352.2	103079		45-49	0.000357745	0.00030364		45-49	0.0394787					45-49	0.0099102	0.0115935	0.00833677
	50-54	151940	73042.6	78897.2		50-54	0.00026077	0.000232842		50-54	0.0440391					50-54	0.0126384	0.0147321	0.0106971
	55-59	108888	52575.2	56313		55-59	0.000203757	0.000164099		55-59	0.0569159					55-59	0.0163301	0.0187599	0.0140616
	60-64	78658.6	33368	45290.4		60-64	0.000190235	0.000114271		60-64	0.0714543					60-64	0.0230959	0.0268416	0.0203364
	65-69	65960.7	26075	39885.5		65-69	0.000196807	9.71159e-05		65-69	0.0766393					65-69	0.03462	0.0398162	0.0312233
	70-74	43317.5	17816.8	25500.7		70-74	0.000191289	0.000120582		70-74	0.072004					70-74	0.0541155	0.0608966	0.0493776
	75-79	25793.2	9724.07	16069.1		75-79	0.00012502	2.34064e-05		75-79	0.0595392					75-79	0.0858391	0.095405	0.0800643
	80+	18266.7	6506.77	11759.9		80+	0	0		80+	0.0371507					80+	0.180312	0.19492	0.172229
	Total	5.76346e+06	2.85307e+06	2.91039e+06		Total	0.000258558	0.000252902		Total	0.0174961					Total	0.0107194	0.0117694	0.00969008
	2044					2044				2044						2044
	0-4	1.05414e+06	533362	520776		0-4	3.86629e-05	3.82011e-05		0-4	0.00296828					0-4	0.0250604	0.0285816	0.0214537
	5-9	880759	443299	437460		5-9	0	0		5-9	0.00359476					5-9	0.0044227	0.00503472	0.00380251
	10-14	749415	376560	372855		10-14	0	0		10-14	0.00396334					10-14	0.00242088	0.00266421	0.00217573
	15-19	629360	315691	313669		15-19	0.000162286	0.000272959		15-19	0.0072296					15-19	0.00303557	0.00341145	0.00265727
	20-24	520553	260068	260485		20-24	0.000532491	0.000629152		20-24	0.0131936					20-24	0.00433588	0.00509948	0.0035735
	25-29	446994	222238	224756		25-29	0.00067899	0.000646011		25-29	0.025428					25-29	0.00527714	0.00592544	0.00463609
	30-34	381767	188720	193048		30-34	0.000673079	0.000549156		30-34	0.0385497					30-34	0.00603231	0.00670166	0.00537798
	35-39	308978	151652	157326		35-39	0.000581716	0.000443604		35-39	0.0392153					35-39	0.00738132	0.00822954	0.00656368
	40-44	250739	122042	128696		40-44	0.000456886	0.000356112		40-44	0.0399952					40-44	0.0086072	0.00974437	0.00753056
	45-49	206379	99690	106689		45-49	0.00033794	0.000285358		45-49	0.0391627					45-49	0.00986796	0.0115583	0.00828846
	50-54	159360	76460.8	82899		50-54	0.000247237	0.000217971		50-54	0.0418298					50-54	0.0125419	0.0146591	0.0105892
	55-59	114912	55369	59543.2		55-59	0.000190472	0.000158333		55-59	0.0534875					55-59	0.01623	0.0186581	0.0139721
	60-64	81192.1	35661.2	45530.9		60-64	0.000174073	0.000109941		60-64	0.0676997					60-64	0.0230803	0.0266146	0.0203121
	65-69	66479.2	26281	40198.2		65-69	0.000175623	9.58456e-05		65-69	0.0757341					65-69	0.034675	0.0398261	0.0313073
	70-74	45663.4	18452.9	27210.7		70-74	0.000177004	0.000116064		70-74	0.0724184					70-74	0.0540231	0.0609217	0.0493443
	75-79	26416.7	10189.4	16227.3		75-79	0.000122056	2.25437e-05		75-79	0.0618992					75-79	0.0860308	0.0953547	0.0801762
	80+	18913.1	6651.78	12261.3		80+	0	0		80+	0.0389769					80+	0.180261	0.19499	0.172271
	Total	5.94202e+06	2.94239e+06	2.99963e+06		Total	0.000242758	0.000236765		Total	0.0172757					Total	0.0107073	0.0117576	0.00967685
	2045					2045				2045						2045
	0-4	1.08464e+06	548796	535848		0-4	3.55243e-05	3.50444e-05		0-4	0.00294653					0-4	0.0250661	0.0285887	0.0214584
	5-9	905906	455952	449954		5-9	0	0		5-9	0.00352898					5-9	0.00442115	0.00503326	0.00380088
	10-14	772602	388205	384398		10-14	0	0		10-14	0.00382165					10-14	0.00241886	0.00266233	0.00217297
	15-19	650354	326219	324135		15-19	0.000152194	0.000255993		15-19	0.00722327					15-19	0.00303382	0.00340991	0.00265531
	20-24	538357	268970	269387		20-24	0.000501854	0.000590205		20-24	0.0132968					20-24	0.00433027	0.00509633	0.00356456
	25-29	455313	226405	228908		25-29	0.000638826	0.000605605		25-29	0.0237186					25-29	0.00525166	0.00590395	0.0046065
	30-34	393535	194622	198913		30-34	0.000633213	0.000515407		30-34	0.0383507					30-34	0.00600816	0.0066804	0.00535041
	35-39	319850	157076	162773		35-39	0.000548699	0.000414795		35-39	0.0405327					35-39	0.00735049	0.00820062	0.00653013
	40-44	258373	125796	132577		40-44	0.000431125	0.000335068		40-44	0.0401807					40-44	0.00856841	0.00970858	0.00748823
	45-49	212974	102848	110127		45-49	0.000317956	0.000266779		45-49	0.039061					45-49	0.00983116	0.0115261	0.00824618
	50-54	166772	79916.4	86855.1		50-54	0.000232701	0.000205247		50-54	0.0400807					50-54	0.0124653	0.0145994	0.0105018
	55-59	121282	58259.6	63022.5		55-59	0.000182004	0.000147172		55-59	0.050261					55-59	0.0161214	0.0185621	0.0138652
	60-64	84510.1	38305.8	46204.5		60-64	0.000166396	0.000105183		60-64	0.0639234					60-64	0.0230703	0.0264635	0.020257
	65-69	66670.1	26435.8	40234.3		65-69	0.000167394	8.49083e-05		65-69	0.0743568					65-69	0.0346793	0.0397867	0.0313235
	70-74	48080.4	19047.9	29032.6		70-74	0.000164294	9.99497e-05		70-74	0.0725874					70-74	0.0539804	0.060925	0.0494242
	75-79	27121.6	10693.7	16428		75-79	0.000118092	2.16761e-05		75-79	0.063931					75-79	0.0861435	0.0953571	0.0801459
	80+	19564.9	6812.6	12752.3		80+	0	0		80+	0.0409054					80+	0.180279	0.194899	0.172469
	Total	6.12591e+06	3.03436e+06	3.09155e+06		Total	0.000228364	0.00022186		Total	0.017073					Total	0.010698	0.0117502	0.00966523
	2046					2046				2046						2046
	0-4	1.11638e+06	564851	551526		0-4	3.25283e-05	3.20317e-05		0-4	0.00292878					0-4	0.0250723	0.0285959	0.0214631
	5-9	931676	468918	462758		5-9	0	0		5-9	0.00347642					5-9	0.00441959	0.00503184	0.0037992
	10-14	795996	399953	396043		10-14	0	0		10-14	0.00368641					10-14	0.00241661	0.00266098	0.00216982
	15-19	671884	337017	334868		15-19	0.000144244	0.000241513		15-19	0.0071838					15-19	0.00303241	0.00340906	0.00265402
	20-24	556645	278114	278531		20-24	0.000473955	0.000554491		20-24	0.0133903					20-24	0.00432485	0.00509377	0.00355709
	25-29	465064	231280	233784		25-29	0.000603973	0.000570553		25-29	0.0225467					25-29	0.00522488	0.00588063	0.00457617
	30-34	404428	200089	204338		30-34	0.000597922	0.000484334		30-34	0.0373827					30-34	0.00598622	0.0066615	0.00532499
	35-39	331368	162818	168550		35-39	0.000517453	0.000391379		35-39	0.0420926					35-39	0.00732488	0.00817959	0.00649925
	40-44	266630	129868	136762		40-44	0.000406143	0.000314714		40-44	0.0403823					40-44	0.00853196	0.00967172	0.00744966
	45-49	219303	105882	113421		45-49	0.000299784	0.000252314		45-49	0.0391216					45-49	0.00979832	0.0114987	0.00820894
	50-54	174138	83381.9	90755.8		50-54	0.000217438	0.00019443		50-54	0.0387763					50-54	0.0124049	0.0145536	0.0104308
	55-59	127932	61239.9	66691.7		55-59	0.000173271	0.000136554		55-59	0.0472868					55-59	0.016013	0.0184807	0.013747
	60-64	88662.7	41303.5	47359.2		60-64	0.000158532	9.33619e-05		60-64	0.0602938					60-64	0.023075	0.0263926	0.0201817
	65-69	66674.6	26555.9	40118.7		65-69	0.000159887	8.32315e-05		65-69	0.0724245					65-69	0.0346302	0.0396823	0.0312861
	70-74	50322.3	19609.2	30713.4		70-74	0.000155787	9.82567e-05		70-74	0.0725757					70-74	0.0539968	0.060919	0.0495768
	75-79	28039.6	11203.1	16836.3		75-79	0.000109297	2.05555e-05		75-79	0.0655218					75-79	0.0861117	0.0954151	0.0799354
	80+	20202.6	7003.71	13199.1		80+	0	0		80+	0.0430219					80+	0.180399	0.19467	0.172807
	Total	6.31534e+06	3.12909e+06	3.18626e+06		Total	0.000215455	0.000208461		Total	0.0168867					Total	0.0106911	0.0117466	0.00965443
	2047					2047				2047						2047
	0-4	1.14937e+06	581542	567825		0-4	2.96712e-05	2.91593e-05		0-4	0.00291351					0-4	0.025077	0.0286021	0.0214672
	5-9	958157	482241	475915		5-9	0	0		5-9	0.00343614					5-9	0.00441857	0.00503092	0.00379807
	10-14	819619	411817	407803		10-14	0	0		10-14	0.00356864					10-14	0.00241462	0.0026595	0.00216788
	15-19	693880	348047	345833		15-19	0.000136663	0.000227719		15-19	0.00710726					15-19	0.00303131	0.0034079	0.00265231
	20-24	575482	287530	287952		20-24	0.00045041	0.000524543		20-24	0.0134674					20-24	0.00432031	0.00509195	0.00355056
	25-29	476337	236904	239433		25-29	0.000573016	0.000539449		25-29	0.0217326					25-29	0.00520224	0.00586232	0.00454821
	30-34	414086	204942	209144		30-34	0.000568496	0.000458647		30-34	0.0365258					30-34	0.00596763	0.00664506	0.00530274
	35-39	343462	168849	174613		35-39	0.000491712	0.000370003		35-39	0.0431095					35-39	0.00729198	0.00814859	0.00646365
	40-44	275764	134384	141380		40-44	0.000385496	0.000296607		40-44	0.0405696					40-44	0.00849653	0.0096368	0.00741268
	45-49	225569	108893	116676		45-49	0.000285368	0.000236717		45-49	0.0392766					45-49	0.00976708	0.0114734	0.00817464
	50-54	181396	86815	94580.5		50-54	0.000207604	0.00018255		50-54	0.037888					50-54	0.012358	0.0145168	0.0103788
	55-59	134769	64303.5	70465.4		55-59	0.000164583	0.000130711		55-59	0.0445998					55-59	0.0159096	0.0184039	0.0136335
	60-64	93707.4	44655.8	49051.6		60-64	0.000150693	8.84389e-05		60-64	0.056915					60-64	0.023095	0.0264065	0.0200803
	65-69	66649.9	26669.7	39979.9		65-69	0.000152466	8.09364e-05		65-69	0.0698877					65-69	0.0345294	0.0395213	0.0311997
	70-74	52200.7	20135.5	32065.2		70-74	0.000148305	9.70519e-05		70-74	0.0723948					70-74	0.0540507	0.0609195	0.0497444
	75-79	29239	11693.3	17545.7		75-79	0.000100829	1.95626e-05		75-79	0.0666035					75-79	0.0859615	0.0954721	0.0796232
	80+	20821.8	7233.14	13588.7		80+	0	0		80+	0.0452817					80+	0.180565	0.194438	0.17318
	Total	6.51051e+06	3.22665e+06	3.28385e+06		Total	0.000204442	0.000196978		Total	0.0167157					Total	0.0106859	0.0117465	0.00964391
	2048					2048				2048						2048
	0-4	1.18364e+06	598884	584761		0-4	2.69491e-05	2.68951e-05		0-4	0.00289964					0-4	0.0250814	0.028607	0.0214702
	5-9	985456	495977	489479		5-9	0	0		5-9	0.00340654					5-9	0.00441799	0.00503036	0.00379749
	10-14	843522	423821	419701		10-14	0	0		10-14	0.00347278					10-14	0.00241301	0.00265775	0.00216586
	15-19	716254	359267	356987		15-19	0.000130993	0.00021694		15-19	0.00699665					15-19	0.00303022	0.00340686	0.00265118
	20-24	594921	297248	297673		20-24	0.000430831	0.000499847		20-24	0.0135426					20-24	0.00431655	0.00509035	0.00354386
	25-29	489406	243411	245996		25-29	0.000549	0.000513093		25-29	0.0214929					25-29	0.0051862	0.00585201	0.00452738
	30-34	423270	209555	213715		30-34	0.000544479	0.000436598		30-34	0.0351563					30-34	0.00594339	0.0066242	0.00527688
	35-39	355535	174875	180659		35-39	0.000470972	0.00035209		35-39	0.0439778					35-39	0.00726241	0.00812254	0.00642982
	40-44	285440	139178	146262		40-44	0.00036932	0.000282865		40-44	0.0409235					40-44	0.00846523	0.00960569	0.00738
	45-49	231948	111963	119985		45-49	0.000271719	0.000226531		45-49	0.0393383					45-49	0.00973469	0.0114412	0.00814228
	50-54	188368	90126.5	98240.8		50-54	0.000199513	0.00017242		50-54	0.0373742					50-54	0.0123239	0.0144901	0.0103367
	55-59	141696	67426.1	74269.5		55-59	0.000156762	0.0001254		55-59	0.0422389					55-59	0.0158173	0.0183411	0.013526
	60-64	98858.3	47086.3	51772		60-64	0.000142391	8.92446e-05		60-64	0.0535866					60-64	0.023016	0.0263159	0.0200147
	65-69	68208.4	28356.3	39852.3		65-69	0.000145429	7.81768e-05		65-69	0.0666614					65-69	0.0345307	0.0391501	0.0312437
	70-74	52948.9	20336.9	32612		70-74	0.000141247	8.39563e-05		70-74	0.0719542					70-74	0.0542377	0.0610392	0.0499962
	75-79	30723.4	12153.8	18569.6		75-79	9.30264e-05	1.87123e-05		75-79	0.0672879					75-79	0.0857741	0.0955392	0.079371
	80+	21413.9	7500.21	13913.6		80+	0	0		80+	0.0475959					80+	0.180794	0.194197	0.173569
	Total	6.71161e+06	3.32717e+06	3.38445e+06		Total	0.00019543	0.000187345		Total	0.016559					Total	0.0106825	0.0117495	0.00963362
	2049					2049				2049						2049
	0-4	1.21924e+06	616891	602345		0-4	2.48085e-05	2.47351e-05		0-4	0.00288703					0-4	0.025086	0.0286126	0.0214739
	5-9	1.01371e+06	510191	503514		5-9	0	0		5-9	0.00338437					5-9	0.0044177	0.00502992	0.00379736
	10-14	867803	436015	431788		10-14	0	0		10-14	0.00339557					10-14	0.00241172	0.00265699	0.00216404
	15-19	738925	370636	368290		15-19	0.000125574	0.000206659		15-19	0.00686701					15-19	0.00302919	0.00340573	0.00265025
	20-24	614958	307265	307693		20-24	0.000412118	0.000475372		20-24	0.0135886					20-24	0.00431282	0.00508823	0.00353776
	25-29	504642	250994	253648		25-29	0.000524789	0.00048786		25-29	0.0215882					25-29	0.00517086	0.00584203	0.00450671
	30-34	431757	213807	217951		30-34	0.000520089	0.000415186		30-34	0.0332908					30-34	0.00591839	0.00659978	0.00524996
	35-39	367370	180780	186590		35-39	0.000451089	0.000335012		35-39	0.0449124					35-39	0.00723822	0.00810119	0.00640211
	40-44	295671	144256	151415		40-44	0.000353079	0.000269156		40-44	0.0413807					40-44	0.00844052	0.00958259	0.00735393
	45-49	238700	115236	123464		45-49	0.00026084	0.000214539		45-49	0.039558					45-49	0.00970572	0.011414	0.00811131
	50-54	194964	93261.4	101703		50-54	0.000190059	0.000163697		50-54	0.0371583					50-54	0.0122988	0.0144712	0.0103046
	55-59	148656	70590.2	78065.9		55-59	0.000150296	0.000117392		55-59	0.0402419					55-59	0.0157405	0.0182889	0.0134361
	60-64	104362	49602	54760.1		60-64	0.000139129	8.33195e-05		60-64	0.0504571					60-64	0.0229291	0.0262296	0.0199395
	65-69	70402.2	30335.8	40066.4		65-69	0.000139117	7.52015e-05		65-69	0.063215					65-69	0.0345178	0.0388716	0.0312213
	70-74	53341.8	20492.6	32849.3		70-74	0.000134433	8.2844e-05		70-74	0.071175					70-74	0.054356	0.0610972	0.0501438
	75-79	32406.2	12585.2	19821.2		75-79	8.61501e-05	1.80232e-05		75-79	0.067727					75-79	0.0856365	0.0955912	0.0793037
	80+	22003	7797.34	14205.9		80+	0	0		80+	0.0497556					80+	0.180964	0.194052	0.173777
	Total	6.9189e+06	3.43074e+06	3.48817e+06		Total	0.000186715	0.000177888		Total	0.0164157					Total	0.0106809	0.0117556	0.00962392
	2050					2050				2050						2050
	0-4	1.25617e+06	635576	620592		0-4	2.27679e-05	2.26763e-05		0-4	0.00287528					0-4	0.0250909	0.0286185	0.0214782
	5-9	1.04305e+06	524956	518093		5-9	0	0		5-9	0.00336766					5-9	0.00441771	0.00503017	0.00379713
	10-14	892586	448462	444125		10-14	0	0		10-14	0.00333359					10-14	0.00241038	0.00265576	0.00216261
	15-19	761818	382116	379703		15-19	0.000119668	0.000195382		15-19	0.00673421					15-19	0.00302792	0.00340484	0.00264861
	20-24	635566	317567	317999		20-24	0.000391595	0.000449384		20-24	0.0135949					20-24	0.00430931	0.00508729	0.00353238
	25-29	522043	259660	262384		25-29	0.000499204	0.000461441		25-29	0.0217221					25-29	0.0051568	0.00583322	0.0044874
	30-34	439873	217855	222018		30-34	0.000495362	0.00039187		30-34	0.0316524					30-34	0.00589325	0.00657631	0.005223
	35-39	378795	186487	192308		35-39	0.00042902	0.000317251		35-39	0.0448216					35-39	0.00721513	0.00808263	0.0063739
	40-44	306149	149457	156692		40-44	0.000337206	0.000253998		40-44	0.0428211					40-44	0.00842518	0.00956804	0.0073351
	45-49	246019	118807	127212		45-49	0.000247939	0.000202896		45-49	0.0398263					45-49	0.00967773	0.0113859	0.0080842
	50-54	201224	96226.4	104998		50-54	0.000179146	0.000156093		50-54	0.0371368					50-54	0.0122771	0.0144581	0.0102782
	55-59	155603	73786.8	81816.2		55-59	0.000141466	0.00011054		55-59	0.038667					55-59	0.0156776	0.0182483	0.0133619
	60-64	110187	52204.5	57982.5		60-64	0.000129232	7.74371e-05		60-64	0.0475112					60-64	0.0228329	0.0261508	0.0198417
	65-69	73274.2	32603.8	40670.4		65-69	0.000132976	6.39439e-05		65-69	0.0597522					65-69	0.0345115	0.0387091	0.031141
	70-74	53488.9	20614.7	32874		70-74	0.000128124	8.15243e-05		70-74	0.069936					70-74	0.0543856	0.0610812	0.0501873
	75-79	34129.4	12989.5	21139.9		75-79	8.00894e-05	1.74777e-05		75-79	0.0679519					75-79	0.0855877	0.0956341	0.0794251
	80+	22650.1	8116.54	14533.5		80+	0	0		80+	0.0517629					80+	0.180957	0.193995	0.173676
	Total	7.13262e+06	3.53748e+06	3.59514e+06		Total	0.000177582	0.000168143		Total	0.0162846					Total	0.0106811	0.0117641	0.0096155

## Sheet: Zambezia, part 1
	Input	Data		Reference
	Percent circumcised in base year (2009), by 5-year age group	EIMC	0.177286	Ministerio da Saude (MISAU), Instituto Nacional de Estatística (INE) e ICF International (ICFI) (2013). Moçambique Inquérito Demográfico e de Saúde 2011. Calverton, Maryland; 2013. (age >15 years)
		5-9	0.231669
		10-14	0.286051
		15-19	0.340433
		20-24	0.413787
		25-29	0.494663
		30-34	0.48714
		35-39	0.48714
		40-44	0.534161
		45-49	0.534161
		50-54	0.534161
		55-59	0.534161
	VMMC effectiveness		0.6	Auvert B, Taljaard D, Lagarde E, Sobngwi-Tambekou J, Sitta R, et al. (2005) Randomized, controlled intervention trial of male circumcision for reduction of HIV infection risk: The ANRS 1265 trial. PLoS Med 2(11): e298.
				Gray RH, Kigozi G, Serwadda D, Makumbi F, Watya S, Nalugoda N et al. Male circumcision for HIV prevention n men in Rakai, Uganda: a randomized trial. Lancet 2007; 369: 767-66.
				Bailey RC, Moses S, Parker CB, Agot K, Maclean I, Krieger JN, et al. Male circumcision for HIV prevention in young men in Kisumu, Kenya: a randomized controlled trial. Lancet 2007; 369: 643-56.
	Ratio of infections averted among females to males		0.415824	Spectrum, Goals Model
	HIV incidence		See Part 2	Authors’ Calculations
				Spectrum, AIDS Impact Module and Goals module
	Discount rate		0.03	Authors’ assumption.

## Sheet: Zambezia, part 2
																Mortality rates
			Population by age and sex				Incidence			Prevalence			Total Births								Annual mortality on ART	0
		Total	Male	Female			Male	Female			Male			Male			Total	Male	Female		Non–AIDS mortality
	2000					2000				2000			2000	76415.4		2000					0–4	0.0419096
	0-4	593920	299342	294577		0-4	0.0083674	0.00827612		0-4	0.0191374		2001	78076		0-4	0.0507174	0.0553429	0.046017		5–9	0.00757741
	5-9	460002	230286	229717		5-9	0	0		5-9	0.0058038		2002	79923.5		5-9	0.00916329	0.00965938	0.00866596		10–14	0.00389999
	10-14	362283	181076	181207		10-14	0	0		10-14	0.00157935		2003	81664.4		10-14	0.00448039	0.00459699	0.00436152		15–19	0.00468382
	15-19	282777	135631	147146		15-19	0.00802747	0.0139277		15-19	0.0298539		2004	83482.6		15-19	0.00544558	0.00520682	0.00566566		20–24	0.00830714
	20-24	257480	113249	144231		20-24	0.0264852	0.0324284		20-24	0.0802889		2005	85584.2		20-24	0.00798898	0.00828071	0.00775993		25–29	0.0132357
	25-29	230184	104311	125874		25-29	0.0339429	0.0332984		25-29	0.122074		2006	87718.5		25-29	0.0106679	0.0115077	0.00997185		30–34	0.0154483
	30-34	179452	83956.8	95495.3		30-34	0.0337105	0.0282837		30-34	0.145268		2007	90071.3		30-34	0.0127365	0.0136396	0.0119426		35–39	0.0211122
	35-39	147697	65612.5	82085		35-39	0.0290559	0.0227412		35-39	0.153142		2008	92164		35-39	0.0160934	0.0180035	0.0145666		40–44	0.0219866
	40-44	117259	54362.5	62896.4		40-44	0.0227409	0.0182398		40-44	0.133177		2009	94348.9		40-44	0.0175605	0.0205178	0.0150045		45–49	0.0221717
	45-49	93083.5	44427.2	48656.7		45-49	0.0167066	0.0145568		45-49	0.101438		2010	96665.9		45-49	0.0188209	0.0227725	0.0152039		50–54	0.0225549
	50-54	73408.3	35421.1	37987.2		50-54	0.0121516	0.0111204		50-54	0.0698756		2011	99064.5		50-54	0.0211622	0.0245678	0.0179754		55–59	0.0246977
	55-59	57220	27256	29964.4		55-59	0.00952447	0.00791698		55-59	0.0563332		2012	101546		55-59	0.0244908	0.0278432	0.0214552		60–64	0.0310525
	60-64	45141	21771.7	23369.8		60-64	0.00869718	0.00554143		60-64	0.0416337		2013	103051		60-64	0.0322395	0.0364768	0.0283096		65–69	0.04295
	65-69	34193.6	16872.4	17321.1		65-69	0.00888534	0.00479424		65-69	0.0308128		2014	104877		65-69	0.045842	0.0503677	0.0414581		70–74	0.0651726
	70-74	22862.8	11652.8	11210		70-74	0.00861895	0.00572732		70-74	0.0295505		2015	106685		70-74	0.0704197	0.0762106	0.0644		75–79	0.101246
	75-79	12048.8	6547.9	5500.92		75-79	0.00575208	0.00141036		75-79	0.0253002		2016	108509		75-79	0.109183	0.117716	0.0990267		80–84	0.199417
	80+	10500.9	5851.9	4648.97		80+	0	0		80+	0.00675128		2017	110346		80+	0.216202	0.227781	0.201627
	Total	2.97951e+06	1.43763e+06	1.54189e+06		Total	0.0114486	0.0124591		Total	0.0509194		2018	112057		Total	0.0206945	0.0230839	0.0184666
	2001					2001				2001			2019	113560		2001
	0-4	609218	307064	302154		0-4	0.00951136	0.00940583		0-4	0.0217485		2020	115169		0-4	0.0498811	0.0544937	0.0451921
	5-9	478147	239432	238714		5-9	0	0		5-9	0.00715902		2021	119069		5-9	0.00894886	0.0094643	0.00843189
	10-14	378537	189123	189415		10-14	0	0		10-14	0.00221719		2022	123070		10-14	0.00438903	0.00452047	0.00425777
	15-19	295178	144804	150374		15-19	0.0084627	0.0149516		15-19	0.0320334		2023	127207		15-19	0.00541256	0.00514986	0.00566554
	20-24	255567	112635	142931		20-24	0.0279759	0.0348853		20-24	0.0863185		2024	131469		20-24	0.00815852	0.00826546	0.00807425
	25-29	239077	106385	132693		25-29	0.0358379	0.035828		25-29	0.133292		2025	135839		25-29	0.0112859	0.0118865	0.0108075
	30-34	184749	87306.4	97442.7		30-34	0.035637	0.0304656		30-34	0.159107		2026	140349		30-34	0.0134616	0.014299	0.0127069
	35-39	151815	67071.2	84743.7		35-39	0.0306671	0.0244641		35-39	0.168259		2027	145038		35-39	0.0172523	0.0191515	0.0157442
	40-44	120774	55454.1	65319.3		40-44	0.0240031	0.0196255		40-44	0.146812		2028	149893		40-44	0.0186467	0.0217383	0.0160222
	45-49	95553.5	45104	50449.4		45-49	0.017628	0.0156652		45-49	0.112278		2029	154877		45-49	0.0198063	0.0239946	0.0160534
	50-54	75587.7	36437.1	39150.2		50-54	0.012825	0.0119627		50-54	0.0772053		2030	159960		50-54	0.0219686	0.0254455	0.018733
	55-59	58519.8	27758.3	30761.5		55-59	0.0100615	0.00851234		55-59	0.0619289		2031	165133		55-59	0.0249706	0.0282885	0.0219767
	60-64	45958.5	22024.1	23934.1		h ju	0.00920142	0.00594968		60-64	0.0459673		2032	170392		60-64	0.0324334	0.0367148	0.0284943
	65-69	34732.8	16940.8	17792.4		65-69	0.00939016	0.0051443		65-69	0.0339215		2033	175703		65-69	0.0456931	0.0502897	0.0412915
	70-74	23579.2	11899.7	11679.1		70-74	0.00907597	0.0061576		70-74	0.0324085		2034	181034		70-74	0.0699741	0.0758793	0.0639598
	75-79	12644.5	6654.13	5990.84		75-79	0.00614843	0.00147837		75-79	0.0277975		2035	186359		75-79	0.10824	0.116986	0.0985176
	80+	10023.7	5571.03	4452.66		80+	0	0		80+	0.00749459		2036	191741		80+	0.21437	0.226299	0.199447
	Total	3.06966e+06	1.48166e+06	1.588e+06		Total	0.0121226	0.0133125		Total	0.0556582		2037	197241		Total	0.0206299	0.0229009	0.018511
	2002					2002				2002			2038	202858		2002
	0-4	624091	314604	309488		0-4	0.0101989	0.0100855		0-4	0.0241727		2039	208607		0-4	0.0492003	0.0536996	0.0446279
	5-9	496198	248523	247676		5-9	0	0		5-9	0.00867654		2040	214489		5-9	0.00876631	0.00927712	0.00825376
	10-14	395309	197470	197839		10-14	0	0		10-14	0.0029965		2041	220553		10-14	0.0043146	0.00444773	0.0041817
	15-19	310131	155252	154880		15-19	0.00793036	0.0142101		15-19	0.0335995		2042	226840		15-19	0.00538725	0.00511258	0.00566258
	20-24	253578	111940	141638		20-24	0.0262981	0.0332025		20-24	0.090292		2043	233381		20-24	0.00834484	0.00823711	0.00842998
	25-29	246004	108173	137830		25-29	0.0336747	0.0341169		25-29	0.142746		2044	240209		25-29	0.0119889	0.0122752	0.0117642
	30-34	191299	90374.7	100924		30-34	0.0335004	0.0290196		30-34	0.170799		2045	247330		30-34	0.014249	0.0149842	0.0135906
	35-39	155624	68918.7	86705.5		35-39	0.0288043	0.0233018		35-39	0.181519		2046	254729		35-39	0.0185338	0.0203705	0.0170787
	40-44	124190	56407.6	67782.1		40-44	0.0225568	0.0187022		40-44	0.158967		2047	262386		40-44	0.0198514	0.0230356	0.0171953
	45-49	98099.1	45802.2	52297		45-49	0.0165698	0.014927		45-49	0.122084		2048	270328		45-49	0.0208906	0.0252987	0.01703
	50-54	77659.6	37292	40367.5		50-54	0.0120461	0.0114108		50-54	0.083718		2049	278587		50-54	0.0228544	0.0263776	0.0195996
	55-59	59941.1	28377.4	31563.8		55-59	0.00944572	0.00810163		55-59	0.0667479		2050	287159		55-59	0.025534	0.0287943	0.0226162
	60-64	46789.2	22281.1	24508.5		60-64	0.00864661	0.00568393		60-64	0.0498699					60-64	0.0326931	0.0369777	0.0287973
	65-69	35297.1	17040.3	18256.8		65-69	0.00881552	0.00491795		65-69	0.0365954					65-69	0.0456127	0.0502456	0.0412885
	70-74	24226.4	12094.7	12131.7		70-74	0.00856644	0.00586065		70-74	0.0347812					70-74	0.0696659	0.0756394	0.0637106
	75-79	13215.6	6784.15	6431.48		75-79	0.00577346	0.0014549		75-79	0.029978					75-79	0.107517	0.116184	0.0983747
	80+	9727.52	5359.85	4367.68		80+	0	0		80+	0.00837622					80+	0.21203	0.224275	0.197004
	Total	3.16138e+06	1.52669e+06	1.63469e+06		Total	0.0115759	0.0127422		Total	0.0596333					Total	0.0206362	0.0227442	0.0186675
	2003					2003				2003						2003
	0-4	639043	322176	316868		0-4	0.0104467	0.0103299		0-4	0.0262284					0-4	0.0483556	0.0528384	0.043799
	5-9	513634	257302	256332		5-9	0	0		5-9	0.0103365					5-9	0.00856304	0.00909104	0.00803303
	10-14	412480	206057	206423		10-14	0	0		10-14	0.00391091					10-14	0.00423594	0.00438199	0.00409014
	15-19	324467	162293	162174		15-19	0.00709761	0.0128919		15-19	0.0337379					15-19	0.00533257	0.00504786	0.00561749
	20-24	258069	117290	140779		20-24	0.023672	0.0302006		20-24	0.0906442					20-24	0.00851081	0.00815844	0.00880439
	25-29	247710	108337	139374		25-29	0.0303068	0.0310572		25-29	0.149505					25-29	0.0127211	0.0126803	0.0127559
	30-34	199144	93062.2	106082		30-34	0.0301515	0.0264137		30-34	0.179263					30-34	0.0150575	0.0156747	0.014516
	35-39	158978	71196.7	87781		35-39	0.0259415	0.0212285		35-39	0.191697					35-39	0.0198588	0.0216047	0.0184427
	40-44	127535	57186.9	70348.1		40-44	0.0203207	0.0170452		40-44	0.168655					40-44	0.0210865	0.0243638	0.0184224
	45-49	100718	46548.3	54169.6		45-49	0.014917	0.0135929		45-49	0.13009					45-49	0.0220055	0.0266367	0.0180258
	50-54	79597.2	37957	41639.7		50-54	0.0108479	0.0104031		50-54	0.0888631					50-54	0.0237287	0.0273371	0.0204396
	55-59	61500.1	29123.9	32376.2		55-59	0.00851555	0.00738309		55-59	0.0702473					55-59	0.0260958	0.0292963	0.0232167
	60-64	47635.3	22534.4	25100.9		60-64	0.00780103	0.00517096		60-64	0.0529553					60-64	0.032942	0.0372787	0.0290488
	65-69	35894.5	17177.1	18717.4		65-69	0.00796443	0.00446503		65-69	0.0385255					65-69	0.0455164	0.0502165	0.0412032
	70-74	24791.9	12228.6	12563.4		70-74	0.0076827	0.00536685		70-74	0.036383					70-74	0.0692764	0.0753675	0.0633477
	75-79	13758.7	6937.97	6820.7		75-79	0.0051376	0.00127621		75-79	0.0316429					75-79	0.106733	0.115385	0.0978694
	80+	9601.32	5211.98	4388.92		80+	0	0		80+	0.00938911					80+	0.20955	0.222322	0.194404
	Total	3.25456e+06	1.57262e+06	1.68194e+06		Total	0.0106302	0.0117054		Total	0.0624675					Total	0.0206113	0.0225858	0.0187651
	2004					2004				2004						2004
	0-4	654631	330067	324565		0-4	0.0103286	0.0102138		0-4	0.0278362					0-4	0.0474099	0.0518726	0.0428716
	5-9	530162	265617	264545		5-9	0	0		5-9	0.0121629					5-9	0.00836502	0.00891045	0.00781738
	10-14	429949	214825	215124		10-14	0	0		10-14	0.00494878					10-14	0.00416167	0.00432182	0.00400175
	15-19	339382	169618	169764		15-19	0.00626567	0.0114544		15-19	0.0329161					15-19	0.00524346	0.00497765	0.00550901
	20-24	265020	123811	141209		20-24	0.0210634	0.0269369		20-24	0.0895362					20-24	0.00866276	0.00808226	0.00917172
	25-29	247459	108161	139297		25-29	0.0269583	0.0277229		25-29	0.153379					25-29	0.0133917	0.0130112	0.0136871
	30-34	207818	95369.5	112449		30-34	0.0268105	0.0235575		30-34	0.18484					30-34	0.0158316	0.0163024	0.015436
	35-39	162004	73816.2	88188.1		35-39	0.0231081	0.0189607		35-39	0.198828					35-39	0.0211192	0.0227434	0.0197597
	40-44	130821	57851.8	72969.4		40-44	0.0180895	0.0152327		40-44	0.175951					40-44	0.0222588	0.0255968	0.0196124
	45-49	103371	47323.4	56048.5		45-49	0.0132726	0.0121467		45-49	0.136289					45-49	0.0230437	0.0278706	0.0189681
	50-54	81432.8	38464.4	42968		50-54	0.00965316	0.0092977		50-54	0.0926983					50-54	0.0244826	0.0281917	0.0211527
	55-59	63178.6	29966.1	33212.9		55-59	0.00757679	0.00659275		55-59	0.0725129					55-59	0.0265795	0.0297208	0.0237449
	60-64	48512.7	22797	25715.7		60-64	0.00692611	0.00463196		60-64	0.0551812					60-64	0.0331257	0.037483	0.0292465
	65-69	36515.7	17342	19173.8		65-69	0.0070706	0.00400094		65-69	0.039842					65-69	0.0453821	0.0501311	0.0410868
	70-74	25284	12314.4	12969.6		70-74	0.00684558	0.00479624		70-74	0.0372596					70-74	0.0688021	0.0750147	0.0629361
	75-79	14310.2	7122.81	7187.4		75-79	0.00456912	0.00115776		75-79	0.0326497					75-79	0.105885	0.114598	0.097251
	80+	9592.4	5107.45	4484.95		80+	0	0		80+	0.0104603					80+	0.207353	0.220632	0.192231
	Total	3.34945e+06	1.61957e+06	1.72987e+06		Total	0.00963622	0.0105571		Total	0.0642801					Total	0.0205515	0.0223938	0.0188267
	2005					2005				2005						2005
	0-4	671358	338553	332806		0-4	0.00997476	0.009864		0-4	0.0288611					0-4	0.0463933	0.0508348	0.0418752
	5-9	545816	273457	272358		5-9	0	0		5-9	0.0140847					5-9	0.00817416	0.00873732	0.00760872
	10-14	447690	223748	223942		10-14	0	0		10-14	0.0061038					10-14	0.00409356	0.00426531	0.00392007
	15-19	354884	177251	177633		15-19	0.00545036	0.0100161		15-19	0.0310478					15-19	0.00513174	0.00490235	0.00535825
	20-24	274447	131515	142933		20-24	0.0184461	0.0236146		20-24	0.0866396					20-24	0.00876154	0.00800618	0.00945357
	25-29	245870	107725	138145		25-29	0.0236057	0.0243223		25-29	0.153647					25-29	0.013893	0.0131902	0.0144411
	30-34	216446	97340.2	119106		30-34	0.0234506	0.020636		30-34	0.186978					30-34	0.0164275	0.016745	0.0161716
	35-39	165234	76613.9	88620.2		35-39	0.0202557	0.016642		35-39	0.202267					35-39	0.0221002	0.0235712	0.0208284
	40-44	133986	58568.3	75417.7		40-44	0.0158355	0.0133648		40-44	0.180391					40-44	0.0231537	0.026517	0.020542
	45-49	106037	48088.6	57948.7		45-49	0.0116349	0.0106597		45-49	0.140375					45-49	0.0237987	0.0287524	0.0196806
	50-54	83237.8	38876.1	44361.7		50-54	0.00845271	0.00815462		50-54	0.0950771					50-54	0.0249063	0.0287457	0.0215513
	55-59	64922.4	30831.7	34090.7		55-59	0.0066542	0.00580363		55-59	0.0734186					55-59	0.0268146	0.0299338	0.024006
	60-64	49457.3	23105	26352.2		60-64	0.00607444	0.00406639		60-64	0.0564274					60-64	0.0331289	0.0374982	0.0292818
	65-69	37161.6	17528.5	19633.1		65-69	0.00621999	0.0035023		65-69	0.0404425					65-69	0.0451193	0.049937	0.0408181
	70-74	25735.3	12376.4	13358.8		70-74	0.00599692	0.00418814		70-74	0.0373268					70-74	0.0681901	0.074467	0.0623748
	75-79	14849.4	7314.87	7534.55		75-79	0.00400527	0.00103774		75-79	0.0330199					75-79	0.104988	0.113738	0.0964922
	80+	9682.06	5044.99	4637.07		80+	0	0		80+	0.0114797					80+	0.205214	0.218816	0.190415
	Total	3.44682e+06	1.66794e+06	1.77888e+06		Total	0.00861375	0.0093846		Total	0.0648607					Total	0.0204087	0.0221279	0.0187968
	2006					2006				2006						2006
	0-4	689244	347652	341592		0-4	0.0104927	0.0103762		0-4	0.0294077					0-4	0.0453361	0.0496557	0.0409399
	5-9	560718	280928	279790		5-9	0	0		5-9	0.0161013					5-9	0.00801071	0.00856848	0.00745066
	10-14	465572	232743	232830		10-14	0	0		10-14	0.00741056					10-14	0.00404129	0.00421548	0.00386534
	15-19	370950	185186	185765		15-19	0.0047089	0.00867307		15-19	0.0287516					15-19	0.00500227	0.00482308	0.0051809
	20-24	286394	140433	145961		20-24	0.0159834	0.0204544		20-24	0.0830092					20-24	0.00877736	0.00791533	0.00960965
	25-29	243633	107120	136512		25-29	0.0204561	0.021079		25-29	0.151358					25-29	0.0141863	0.0131694	0.0149842
	30-34	224038	99058.2	124979		30-34	0.0203184	0.0178763		30-34	0.18719					30-34	0.0167528	0.0169265	0.0166152
	35-39	169340	79368.1	89972.3		35-39	0.017604	0.0144381		35-39	0.203486					35-39	0.0226859	0.0239792	0.021545
	40-44	136968	59553.6	77414.8		40-44	0.0137268	0.0115838		40-44	0.183268					40-44	0.0236672	0.0269773	0.0211153
	45-49	108694	48797.4	59897		45-49	0.0100884	0.00924324		45-49	0.143395					45-49	0.0241592	0.0291446	0.0200975
	50-54	85116.4	39281.9	45834.5		50-54	0.00733047	0.00707263		50-54	0.0968689					50-54	0.0249257	0.0288598	0.0215541
	55-59	66666.2	31634.7	35031.5		55-59	0.00576089	0.00503618		55-59	0.0736731					55-59	0.0267505	0.0298321	0.0239678
	60-64	50512.3	23504.9	27007.4		60-64	0.00528114	0.0035165		60-64	0.0570957					60-64	0.0329164	0.0372399	0.0291536
	65-69	37832.9	17729.5	20103.5		65-69	0.0053762	0.00305126		65-69	0.0407841					65-69	0.0447454	0.0495626	0.0404971
	70-74	26186.9	12446.1	13740.8		70-74	0.00523763	0.00365436		70-74	0.0369807					70-74	0.0674845	0.0737428	0.0618158
	75-79	15358.9	7489.51	7869.38		75-79	0.00348228	0.000867282		75-79	0.0329845					75-79	0.10405	0.112788	0.0956803
	80+	9844.8	5022.47	4822.76		80+	0	0		80+	0.0124761					80+	0.203375	0.217005	0.189163
	Total	3.54707e+06	1.71795e+06	1.82912e+06		Total	0.00784985	0.00846897		Total	0.064753					Total	0.0201679	0.0217471	0.0186849
	2007					2007				2007						2007	0	0	0
	0-4	708795	357590	351205		0-4	0.00996991	0.00986275		0-4	0.0288188					0-4	0.0435916	0.0478765	0.0392288
	5-9	575373	288282	287091		5-9	0	0		5-9	0.0178458					5-9	0.00779929	0.00837498	0.00722122
	10-14	483396	241692	241704		10-14	0	0		10-14	0.00874322					10-14	0.00397051	0.00415785	0.00378143
	15-19	387559	193421	194137		15-19	0.00417693	0.00766701		15-19	0.0260066					15-19	0.00484601	0.00474076	0.00495089
	20-24	300899	150586	150313		20-24	0.0141374	0.0180387		20-24	0.0776633					20-24	0.00862114	0.00778514	0.00945866
	25-29	241498	106505	134994		25-29	0.0181108	0.018604		25-29	0.144581					25-29	0.0139545	0.0127707	0.0148884
	30-34	229961	100593	129368		30-34	0.0179851	0.0157703		30-34	0.183201					30-34	0.0163822	0.0165204	0.0162748
	35-39	174792	81963.9	92828.5		35-39	0.0156034	0.0127433		35-39	0.200103					35-39	0.0222943	0.0234531	0.0212711
	40-44	139850	60976.2	78874		40-44	0.0121516	0.0102217		40-44	0.182453					40-44	0.0232129	0.0263967	0.0207516
	45-49	111391	49462.8	61928.5		45-49	0.00893307	0.00816832		45-49	0.143967					45-49	0.0235437	0.0284004	0.0196646
	50-54	87175.1	39763.7	47411.7		50-54	0.00648677	0.0062426		50-54	0.0973969					50-54	0.0240544	0.0280506	0.0207026
	55-59	68398.2	32330.7	36067.4		55-59	0.00510407	0.00444504		55-59	0.0728381					55-59	0.0259738	0.0290979	0.0231733
	60-64	51720.4	24027.5	27692.8		60-64	0.00467327	0.00310116		60-64	0.056741					60-64	0.032164	0.0364299	0.0284627
	65-69	38543.4	17945.3	20598.1		65-69	0.00477773	0.00268844		65-69	0.0405882					65-69	0.0439758	0.0488244	0.0397516
	70-74	26674.3	12546	14128.3		70-74	0.00460418	0.00321915		70-74	0.0359377					70-74	0.0664267	0.0727156	0.060812
	75-79	15833.9	7634.4	8199.54		75-79	0.00307331	0.000764686		75-79	0.0323093					75-79	0.102753	0.111593	0.0944706
	80+	10064.1	5036.06	5027.99		80+	0	0		80+	0.0133096					80+	0.201436	0.215069	0.18778
	Total	3.65192e+06	1.77035e+06	1.88157e+06		Total	0.00709707	0.00760385		Total	0.0631781					Total	0.0195342	0.0210367	0.0181203
	2008					2008				2008						2008
	0-4	729476	368101	361375		0-4	0.0101187	0.0100106		0-4	0.0279474					0-4	0.0419096	0.0461608	0.0375804
	5-9	590258	295750	294509		5-9	0	0		5-9	0.0192611					5-9	0.00757741	0.00817068	0.00698164
	10-14	500636	250346	250290		10-14	0	0		10-14	0.0100727					10-14	0.00389999	0.00410068	0.00369925
	15-19	404517	201861	202656		15-19	0.00371191	0.00680382		15-19	0.0233226					15-19	0.00468382	0.0046541	0.00471343
	20-24	314830	157435	157395		20-24	0.0124769	0.0159378		20-24	0.0702581					20-24	0.00830714	0.00757332	0.00904114
	25-29	245624	111669	133955		25-29	0.0160082	0.0164597		25-29	0.13436					25-29	0.0132357	0.0120242	0.0142457
	30-34	231293	100709	130583		30-34	0.015894	0.0139472		30-34	0.176835					30-34	0.0154483	0.0156448	0.0152969
	35-39	181722	84354.9	97367		35-39	0.0137949	0.0112707		35-39	0.194122					35-39	0.0211122	0.0221838	0.0201836
	40-44	142607	62919.4	79687.3		40-44	0.0107486	0.00904443		40-44	0.179633					40-44	0.0219866	0.0249602	0.0196387
	45-49	114240	50092.9	64147.4		45-49	0.00790712	0.00723108		45-49	0.143516					45-49	0.0221717	0.0267707	0.0185803
	50-54	89485.3	40386.7	49098.6		50-54	0.00574563	0.00552084		50-54	0.0978848					50-54	0.0225549	0.0265132	0.019299
	55-59	70142.9	32920.5	37222.3		55-59	0.00450651	0.00393733		55-59	0.0719117					55-59	0.0246977	0.0278667	0.021895
	60-64	53120	24694.2	28425.8		60-64	0.00413654	0.00275142		60-64	0.0560858					60-64	0.0310525	0.0352399	0.0274149
	65-69	39305.7	18176.9	21128.8		65-69	0.00421685	0.00238767		65-69	0.0403828					65-69	0.04295	0.0478049	0.0387531
	70-74	27207.2	12683.2	14524.4		70-74	0.00408271	0.00283814		70-74	0.034794					70-74	0.0651726	0.0714932	0.0596805
	75-79	16271.2	7747.43	8523.75		75-79	0.00271804	0.000675387		75-79	0.0313738					75-79	0.101246	0.11024	0.0930708
	80+	10340.7	5086.2	5254.47		80+	0	0		80+	0.0141726					80+	0.199417	0.213033	0.186317
	Total	3.76107e+06	1.82493e+06	1.93614e+06		Total	0.00656172	0.00698654		Total	0.0609064					Total	0.01872	0.0201861	0.0173378
	2009					2009				2009						2009
	0-4	751275	379183	372092		0-4	0.00901823	0.00892166		0-4	0.0266368					0-4	0.0402388	0.0444363	0.0359614
	5-9	605931	303619	302312		5-9	0	0		5-9	0.0203133					5-9	0.00734566	0.00795053	0.00673818
	10-14	517002	258556	258445		10-14	0	0		10-14	0.0114078					10-14	0.00383078	0.00404277	0.00361868
	15-19	421734	210456	211278		15-19	0.0033462	0.00609584		15-19	0.0209654					15-19	0.00453291	0.00457709	0.00449091
	20-24	329354	164528	164826		20-24	0.0111689	0.014217		20-24	0.0624401					20-24	0.00796532	0.0073553	0.00857424
	25-29	252116	117927	134190		25-29	0.014365	0.0147048		25-29	0.122732					25-29	0.0129218	0.0115518	0.0141258
	30-34	231039	100587	130451		30-34	0.0142659	0.01246		30-34	0.168256					30-34	0.0149871	0.0151906	0.0148335
	35-39	189629	86499	103130		35-39	0.0123727	0.0100576		35-39	0.185905					35-39	0.020662	0.021629	0.0198551
	40-44	145310	65281.9	80028		40-44	0.00966031	0.00808239		40-44	0.174706					40-44	0.0215424	0.0243498	0.0192524
	45-49	117223	50715.4	66507.7		45-49	0.00709989	0.00646313		45-49	0.141513					45-49	0.0216329	0.026107	0.0182212
	50-54	91992.3	41126	50866.7		50-54	0.00515216	0.00493961		50-54	0.0979065					50-54	0.0218155	0.0257989	0.0185948
	55-59	71919	33428.3	38491.1		55-59	0.00405708	0.00351689		55-59	0.0707376					55-59	0.0239814	0.0272146	0.0211843
	60-64	54689.6	25473.9	29215.7		60-64	0.00370575	0.00245996		60-64	0.0549053					60-64	0.0303788	0.0344948	0.02679
	65-69	40130.9	18434.4	21696.5		65-69	0.00377721	0.00213238		65-69	0.0400124					65-69	0.0422256	0.0471141	0.0380525
	70-74	27776.5	12848.9	14927.6		70-74	0.00368274	0.00254956		70-74	0.0334394					70-74	0.0641885	0.070505	0.0587515
	75-79	16676.5	7837.51	8839.46		75-79	0.00246589	0.000594797		75-79	0.0302366					75-79	0.0999312	0.109027	0.0918618
	80+	10673.8	5167.79	5506.02		80+	0	0		80+	0.0148141					80+	0.197611	0.211149	0.184905
	Total	3.87447e+06	1.88167e+06	1.9928e+06		Total	0.0058986	0.00625375		Total	0.0580513					Total	0.0181053	0.0195178	0.0167715
	2010					2010				2010						2010
	0-4	773771	390642	383129		0-4	0.00913542	0.00903499		0-4	0.0255205					0-4	0.038807	0.042887	0.034647
	5-9	622832	312146	310687		5-9	0	0		5-9	0.0209933					5-9	0.00712313	0.00771972	0.00652372
	10-14	532532	266319	266213		10-14	0	0		10-14	0.0127022					10-14	0.00376454	0.00397759	0.0035514
	15-19	439182	219187	219994		15-19	0.00349643	0.00565171		15-19	0.019177					15-19	0.00441475	0.00451108	0.00431877
	20-24	344438	171887	172551		20-24	0.0116064	0.0131313		20-24	0.0548413					20-24	0.00765104	0.00713184	0.00816824
	25-29	260840	125243	135597		25-29	0.0149542	0.0135932		25-29	0.110576					25-29	0.0131136	0.0113825	0.0147124
	30-34	229553	100211	129342		30-34	0.0148512	0.0115207		30-34	0.1577					30-34	0.0151785	0.0153197	0.0150691
	35-39	197502	88329.1	109173		35-39	0.0128489	0.00928056		35-39	0.175789					35-39	0.0210948	0.0219602	0.0203947
	40-44	148252	67827.9	80423.6		40-44	0.0100724	0.00747816		40-44	0.167476					40-44	0.0220322	0.0247826	0.0197125
	45-49	120139	51396.6	68742.4		45-49	0.00738756	0.00596844		45-49	0.137399					45-49	0.0221194	0.0267035	0.0186921
	50-54	94578.7	41895.5	52683.2		50-54	0.00535751	0.00456427		50-54	0.096745					50-54	0.0219872	0.0261669	0.0186634
	55-59	73738.5	33883.8	39854.7		55-59	0.00420966	0.00324816		55-59	0.068984					55-59	0.0239198	0.0272375	0.0210885
	60-64	56354.5	26291.5	30063		60-64	0.00385959	0.00227614		60-64	0.0529887					60-64	0.0301977	0.0342949	0.0266145
	65-69	41034.7	18740.8	22293.9		65-69	0.00392949	0.00197535		65-69	0.0391724					65-69	0.0418237	0.0467521	0.0376808
	70-74	28376.1	13036.3	15340.2		70-74	0.00381505	0.00233812		70-74	0.0318895					70-74	0.0634162	0.0697523	0.0580577
	75-79	17066.6	7917.82	9148.79		75-79	0.00257138	0.000568445		75-79	0.0286629					75-79	0.0987427	0.107814	0.0908922
	80+	11044.3	5268.92	5775.41		80+	0	0		80+	0.0150477					80+	0.195983	0.209435	0.183711
	Total	3.99123e+06	1.94022e+06	2.05101e+06		Total	0.00611828	0.00596087		Total	0.0548261					Total	0.0177761	0.0190985	0.0165253
	2011					2011				2011						2011
	0-4	797011	402464	394546		0-4	0.00783933	0.00775394		0-4	0.0237051					0-4	0.0373305	0.0413896	0.033191
	5-9	641063	321350	319713		5-9	0	0		5-9	0.0211504					5-9	0.00690531	0.00751316	0.00629436
	10-14	547358	273733	273624		10-14	0	0		10-14	0.0138041					10-14	0.00370372	0.00392573	0.00348162
	15-19	456741	227975	228766		15-19	0.0031105	0.00515655		15-19	0.0178206					15-19	0.00431945	0.00446953	0.00416989
	20-24	360062	179509	180553		20-24	0.0102586	0.0119377		20-24	0.0476724					20-24	0.00729543	0.00692372	0.00766499
	25-29	271887	133661	138226		25-29	0.0132178	0.012355		25-29	0.0984357					25-29	0.012959	0.0110154	0.0148384
	30-34	227446	99664.9	127781		30-34	0.013128	0.0104781		30-34	0.145307					30-34	0.01494	0.0149944	0.0148974
	35-39	204502	89943.8	114558		35-39	0.011359	0.00843604		35-39	0.1643					35-39	0.0208153	0.0215613	0.020226
	40-44	152054	70371	81682.2		40-44	0.00894591	0.00680469		40-44	0.158363					40-44	0.0218054	0.024364	0.0196012
	45-49	122938	52332.2	70605.6		45-49	0.00653095	0.0054267		45-49	0.131801					45-49	0.0218992	0.0263722	0.0185839
	50-54	97208.5	42641.3	54567.3		50-54	0.00474305	0.00415534		50-54	0.0945415					50-54	0.0216547	0.0259185	0.0183227
	55-59	75682.9	34360.6	41322.3		55-59	0.00372979	0.00295691		55-59	0.0669046					55-59	0.0234625	0.0268843	0.0206172
	60-64	58056.2	27069.9	30986.3		60-64	0.00341623	0.00207277		60-64	0.0506271					60-64	0.0297297	0.033811	0.0261642
	65-69	42051	19132.1	22918.9		65-69	0.00349856	0.0017964		65-69	0.0379715					65-69	0.0412372	0.0461955	0.0370981
	70-74	29005.8	13236.9	15768.9		70-74	0.00337639	0.00214383		70-74	0.0302653					70-74	0.0625522	0.0689201	0.0572068
	75-79	17466	8006.2	9459.83		75-79	0.00228108	0.000499851		75-79	0.0268462					75-79	0.0974577	0.106624	0.0897004
	80+	11431.4	5375.14	6056.28		80+	0	0		80+	0.0149668					80+	0.194514	0.208063	0.182488
	Total	4.11196e+06	2.00083e+06	2.11114e+06		Total	0.00539814	0.00536057		Total	0.0511375					Total	0.0172845	0.0185529	0.0160824
	2012					2012				2012						2012
	0-4	820657	414488	406169		0-4	0.00548891	0.00542929		0-4	0.0201649					0-4	0.0354818	0.0395165	0.0313646
	5-9	661093	331464	329628		5-9	0	0		5-9	0.02081					5-9	0.00666782	0.00728647	0.00604572
	10-14	561952	281042	280910		10-14	0	0		10-14	0.0147922					10-14	0.00363475	0.00386597	0.00340342
	15-19	474214	236706	237508		15-19	0.00286649	0.00478785		15-19	0.0169398					15-19	0.00424004	0.0044411	0.00404145
	20-24	376187	187392	188795		20-24	0.00941599	0.0110518		20-24	0.0415696					20-24	0.00691721	0.00671864	0.00711431
	25-29	285328	143206	142122		25-29	0.0121243	0.0114351		25-29	0.0873913					25-29	0.0126151	0.010658	0.0145871
	30-34	225318	99065.4	126252		30-34	0.0120413	0.00969924		30-34	0.132436					30-34	0.0145681	0.0145962	0.0145461
	35-39	209978	91363.4	118614		35-39	0.0104126	0.00780314		35-39	0.152852					35-39	0.0203292	0.0211658	0.0196848
	40-44	157046	72758.2	84287.4		40-44	0.00822456	0.00629743		40-44	0.14872					40-44	0.0214099	0.0239326	0.0192323
	45-49	125628	53641.8	71985.7		45-49	0.00598913	0.00502078		45-49	0.125825					45-49	0.0215285	0.0260135	0.0181863
	50-54	99853.6	43333.4	56520.6		50-54	0.00435493	0.0038415		50-54	0.0918424					50-54	0.0212129	0.025632	0.0178173
	55-59	77804.5	34908.7	42895.8		55-59	0.00342401	0.00273708		55-59	0.0649973					55-59	0.0229156	0.026523	0.0199798
	60-64	59761.8	27760	32001.9		60-64	0.00313452	0.00190838		60-64	0.0483413					60-64	0.0291798	0.0333226	0.0255862
	65-69	43201.3	19627.1	23574.2		65-69	0.00319394	0.00165265		65-69	0.0366109					65-69	0.0406114	0.0455933	0.0364636
	70-74	29669.5	13448.9	16220.6		70-74	0.0031145	0.00196412		70-74	0.0288349					70-74	0.0616685	0.0681179	0.0562949
	75-79	17892.2	8114.98	9777.24		75-79	0.00207623	0.000481262		75-79	0.0251056					75-79	0.0961575	0.105404	0.0884833
	80+	11824	5479.25	6344.79		80+	0	0		80+	0.0146433					80+	0.193086	0.206747	0.181289
	Total	4.23741e+06	2.0638e+06	2.17361e+06		Total	0.00464211	0.00465296		Total	0.0471769					Total	0.0166688	0.0179259	0.0154752
	2013					2013				2013						2013
	0-4	844036	426401	417634		0-4	0.0035347	0.00349706		0-4	0.0162665					0-4	0.0335435	0.0374468	0.0295583
	5-9	682209	342141	340069		5-9	0	0		5-9	0.0201594					5-9	0.00643215	0.00704046	0.00581887
	10-14	576792	288477	288314		10-14	0	0		10-14	0.0155104					10-14	0.00357807	0.00381052	0.00334696
	15-19	491106	245146	245960		15-19	0.00258138	0.00432432		15-19	0.016348					15-19	0.00414611	0.00439392	0.00389912
	20-24	392703	195483	197219		20-24	0.00844953	0.00995902		20-24	0.0363533					20-24	0.00646508	0.0064927	0.00643771
	25-29	298456	149684	148773		25-29	0.0108601	0.0102989		25-29	0.0767552					25-29	0.011438	0.00998098	0.0129068
	30-34	229037	103898	125140		30-34	0.0107891	0.00874093		30-34	0.118915					30-34	0.0133297	0.0135983	0.01311
	35-39	211348	91479.9	119868		35-39	0.00933145	0.00702578		35-39	0.141789					35-39	0.0184623	0.0198476	0.0174016
	40-44	163400	74951.2	88448.1		40-44	0.00736472	0.00566799		40-44	0.139171					40-44	0.0196464	0.022433	0.0172851
	45-49	128199	55397.1	72802		45-49	0.00537202	0.00452435		45-49	0.120096					45-49	0.019867	0.0245066	0.0163365
	50-54	102593	43957.2	58636.2		50-54	0.00389806	0.00346625		50-54	0.0889444					50-54	0.0198264	0.0245046	0.0163266
	55-59	80131.7	35561.4	44570.4		55-59	0.00306401	0.00246212		55-59	0.063482					55-59	0.0216826	0.0255941	0.0185618
	60-64	61475.9	28351	33124.9		60-64	0.0028058	0.00172717		60-64	0.0463788					60-64	0.0280759	0.0323731	0.0243981
	65-69	44510	20238.6	24271.4		65-69	0.00287183	0.0014877		65-69	0.0352878					65-69	0.03957	0.0446147	0.035381
	70-74	30374.9	13672	16702.9		70-74	0.00276995	0.00177517		70-74	0.0277002					70-74	0.0604323	0.0669443	0.0551019
	75-79	18351.5	8248.4	10103.1		75-79	0.0018288	0.000423368		75-79	0.0235551					75-79	0.094538	0.103802	0.0869748
	80+	12224.7	5582.93	6641.81		80+	0	0		80+	0.0142739					80+	0.191345	0.204962	0.179899
	Total	4.36695e+06	2.12867e+06	2.23828e+06		Total	0.00391666	0.00395124		Total	0.0432994					Total	0.0157165	0.017056	0.0144428
	2014					2014				2014						2014
	0-4	867237	438198	429038		0-4	0.00201611	0.00199492		0-4	0.0132248					0-4	0.0322919	0.0361381	0.0283636
	5-9	704419	353402	351017		5-9	0	0		5-9	0.0193612					5-9	0.00620401	0.00682213	0.0055817
	10-14	592390	296301	296089		10-14	0	0		10-14	0.0159843					10-14	0.00352187	0.00376153	0.00328203
	15-19	507160	253161	253998		15-19	0.00207085	0.00347379		15-19	0.0159736					15-19	0.00396795	0.00425146	0.00368706
	20-24	409564	203741	205823		20-24	0.0067631	0.00798066		20-24	0.0318303					20-24	0.00588041	0.00621077	0.00555339
	25-29	312784	156547	156236		25-29	0.00867425	0.00824936		25-29	0.0677699					25-29	0.00900269	0.00843055	0.009576
	30-34	235349	109942	125406		30-34	0.00861985	0.00700421		30-34	0.107364					30-34	0.0104861	0.0107946	0.0102157
	35-39	211935	91646.4	120289		35-39	0.007456	0.00562687		35-39	0.133553					35-39	0.0139462	0.015189	0.0129993
	40-44	171202	77182	94020		40-44	0.00588228	0.00453895		40-44	0.132835					40-44	0.0150579	0.0171821	0.0133141
	45-49	131077	57712.1	73364.6		45-49	0.00429824	0.00362827		45-49	0.117633					45-49	0.0156251	0.0190398	0.0129331
	50-54	105637	44662.6	60974.1		50-54	0.00312084	0.00277471		50-54	0.0884542					50-54	0.0165803	0.0203691	0.0138051
	55-59	82729.6	36356.4	46372.8		55-59	0.00245726	0.00197365		55-59	0.0638874					55-59	0.0192298	0.0228022	0.0164292
	60-64	63282.7	28898.3	34384.4		60-64	0.00224485	0.00137714		60-64	0.0460247					60-64	0.0260188	0.0300838	0.0226146
	65-69	45994.2	20959.2	25035.4		65-69	0.00228644	0.00118948		65-69	0.0349151					65-69	0.0378681	0.0426347	0.033877
	70-74	31147.4	13922.7	17224.7		70-74	0.0022392	0.00142305		70-74	0.0274107					70-74	0.0587425	0.0651285	0.0535807
	75-79	18845.7	8404.77	10441		75-79	0.00147725	0.000328313		75-79	0.022812					75-79	0.092555	0.101668	0.0852189
	80+	12642	5692.13	6949.87		80+	0	0		80+	0.0143347					80+	0.189365	0.202896	0.178283
	Total	4.50339e+06	2.19673e+06	2.30666e+06		Total	0.0029996	0.00303504		Total	0.0403264					Total	0.0143106	0.0156796	0.0130069
	2015					2015				2015						2015
	0-4	890271	449933	440339		0-4	0.00140468	0.00139031		0-4	0.012957					0-4	0.0307877	0.0345241	0.0269709
	5-9	727185	364952	362233		5-9	0	0		5-9	0.019249					5-9	0.00600102	0.00659807	0.00540066
	10-14	609209	304777	304432		10-14	0	0		10-14	0.0161177					10-14	0.00346509	0.00370433	0.00322559
	15-19	522393	260737	261656		15-19	0.00164473	0.00276348		15-19	0.0158574					15-19	0.00389129	0.00420942	0.00357428
	20-24	426648	212134	214515		20-24	0.00536222	0.00633589		20-24	0.0283818					20-24	0.00548659	0.00599109	0.0049857
	25-29	328010	163722	164288		25-29	0.00686252	0.00654769		25-29	0.0600623					25-29	0.00796817	0.00783272	0.00810058
	30-34	244146	117130	127016		30-34	0.00682045	0.00555775		30-34	0.0974243					30-34	0.00947823	0.00986008	0.0091261
	35-39	211785	91734.4	120050		35-39	0.00590349	0.00447169		35-39	0.126268					35-39	0.0124514	0.0138867	0.0113546
	40-44	179522	79342.2	100180		40-44	0.00464401	0.00359435		40-44	0.12786					40-44	0.0136168	0.0157932	0.0118931
	45-49	134499	60364.8	74134.5		45-49	0.00340785	0.00288183		45-49	0.11578					45-49	0.0144882	0.0177596	0.0118301
	50-54	108852	45533.2	63318.8		50-54	0.00247492	0.00220731		50-54	0.0888674					50-54	0.0156924	0.0194291	0.0130053
	55-59	85509.4	37231.3	48277.7		55-59	0.00193805	0.00156928		55-59	0.0650151					55-59	0.0184953	0.0221294	0.0157017
	60-64	65198.6	29429	35769.6		60-64	0.00177439	0.00109754		60-64	0.04634					60-64	0.0252998	0.0294113	0.0219171
	65-69	47597.9	21729.2	25869.1		65-69	0.00182396	0.000953609		65-69	0.0348744					65-69	0.0371726	0.0419062	0.0331959
	70-74	31998.9	14219.3	17779.2		70-74	0.00176729	0.0011385		70-74	0.0274844					70-74	0.0578432	0.0641884	0.0527699
	75-79	19368.4	8578.14	10790.7		75-79	0.00120059	0.000278171		75-79	0.0223855					75-79	0.0913738	0.100456	0.0841504
	80+	13075.8	5808.13	7267.7		80+	0	0		80+	0.0144491					80+	0.187924	0.201405	0.17721
	Total	4.64527e+06	2.26735e+06	2.37792e+06		Total	0.00236447	0.00239396		Total	0.038432					Total	0.0135628	0.0149528	0.0122373
	2016					2016				2016						2016
	0-4	911856	460963	450893		0-4	0.00128833	0.00127438		0-4	0.0122231					0-4	0.0293502	0.0329873	0.0256318
	5-9	751350	377206	374144		5-9	0	0		5-9	0.0188526					5-9	0.0056802	0.00626882	0.00508677
	10-14	627403	313955	313447		10-14	0	0		10-14	0.0161498					10-14	0.00337206	0.00360957	0.00313417
	15-19	536953	267984	268969		15-19	0.00125073	0.002089		15-19	0.0158582					15-19	0.00377549	0.00411619	0.00343603
	20-24	443804	220586	223218		20-24	0.00407395	0.00478687		20-24	0.0257402					20-24	0.00517397	0.00578658	0.00456858
	25-29	343897	171169	172728		25-29	0.00520331	0.00494296		25-29	0.0534816					25-29	0.00705022	0.00719651	0.00690524
	30-34	255426	125456	129969		30-34	0.00517398	0.00419639		30-34	0.0890267					30-34	0.00852235	0.00886361	0.00819621
	35-39	211189	91745	119444		35-39	0.00447506	0.00337598		35-39	0.119911					35-39	0.010897	0.0121761	0.00991452
	40-44	187410	81435.3	105975		40-44	0.00352153	0.00271513		40-44	0.124417					40-44	0.0120778	0.0139732	0.0106213
	45-49	138917	63133.9	75782.7		45-49	0.00259915	0.00217904		45-49	0.114799					45-49	0.0131863	0.0160182	0.0108271
	50-54	112123	46713.6	65409.8		50-54	0.0018724	0.00166715		50-54	0.0903783					50-54	0.014757	0.0182013	0.0122972
	55-59	88403.9	38125.3	50278.6		55-59	0.00147097	0.00118759		55-59	0.0668788					55-59	0.0177071	0.0212315	0.0150346
	60-64	67274.3	29998.4	37275.5		60-64	0.00134524	0.00082382		60-64	0.0473997					60-64	0.0244939	0.0285415	0.0212482
	65-69	49265.6	22481.7	26784.4		65-69	0.00137779	0.000711974		65-69	0.0352614					65-69	0.0363627	0.0410138	0.0324582
	70-74	32954.9	14590.6	18364.3		70-74	0.00132759	0.000850115		70-74	0.0278814					70-74	0.0567969	0.0630206	0.0518522
	75-79	19920.3	8763.82	11156.1		75-79	0.00088704	0.000192907		75-79	0.0223161					75-79	0.0900151	0.0989576	0.0829556
	80+	13531.3	5935.6	7595.74		80+	0	0		80+	0.0147158					80+	0.186277	0.199513	0.175934
	Total	4.79168e+06	2.34024e+06	2.45143e+06		Total	0.0018614	0.00186885		Total	0.0368015					Total	0.0127957	0.0141447	0.0115079
	2017					2017				2017						2017
	0-4	931356	470918	460438		0-4	0.00108261	0.00107111		0-4	0.0116886					0-4	0.0282625	0.0318966	0.0245458
	5-9	776601	390015	386586		5-9	0	0		5-9	0.0181211					5-9	0.00539374	0.00597469	0.00480764
	10-14	647451	324071	323380		10-14	0	0		10-14	0.0158834					10-14	0.0032683	0.00351262	0.00302345
	15-19	551321	275150	276172		15-19	0.00105966	0.00176357		15-19	0.015867					15-19	0.00364549	0.00399818	0.0032941
	20-24	460839	228988	231851		20-24	0.00345491	0.00404028		20-24	0.02367					20-24	0.0049071	0.00559651	0.00422621
	25-29	360257	178880	181378		25-29	0.00440798	0.00416798		25-29	0.0476763					25-29	0.00629837	0.00661075	0.00599027
	30-34	269276	134955	134321		30-34	0.00438178	0.0035413		30-34	0.0816214					30-34	0.00766109	0.00791859	0.00740237
	35-39	210631	91785.4	118846		35-39	0.00379232	0.00284853		35-39	0.113691					35-39	0.00946531	0.0103745	0.00875954
	40-44	194198	83484.7	110714		40-44	0.00297918	0.00228912		40-44	0.121756					40-44	0.010671	0.0121084	0.00958719
	45-49	144654	65898	78756.3		45-49	0.00220509	0.00183415		45-49	0.114126					45-49	0.0119319	0.0142244	0.0100137
	50-54	115445	48325.3	67120		50-54	0.00159366	0.00140326		50-54	0.0925855					50-54	0.0139055	0.0169524	0.0117117
	55-59	91384.7	39017.2	52367.5		55-59	0.00124354	0.000999494		55-59	0.0690346					55-59	0.0169808	0.0203433	0.0144836
	60-64	69548.8	30651.5	38897.8		60-64	0.00114281	0.000700209		60-64	0.0489499					60-64	0.0237601	0.0277115	0.020646
	65-69	50967	23174.7	27792.7		65-69	0.00117589	0.000609831		65-69	0.0359467					65-69	0.0356241	0.0402274	0.0317851
	70-74	34031.7	15051.3	18980.4		70-74	0.00112453	0.000712859		70-74	0.0284329					70-74	0.0558365	0.0619671	0.0509749
	75-79	20502.9	8960.98	11542.3		75-79	0.000749877	0.00018661		75-79	0.0225277					75-79	0.0887424	0.0976813	0.0817994
	80+	14009.8	6074.55	7935.24		80+	0	0		80+	0.0150443					80+	0.184768	0.197957	0.174672
	Total	4.94248e+06	2.4154e+06	2.52708e+06		Total	0.00159309	0.00158898		Total	0.0353531					Total	0.0121308	0.0134257	0.010893
	2018	0	0	0		2018				2018	0					2018
	0-4	950408	480644	469764		0-4	0.00097244	0.00096184		0-4	0.0110893					0-4	0.0271796	0.0307693	0.0235067
	5-9	801804	402812	398992		5-9	0	0		5-9	0.0171171					5-9	0.00511504	0.00569628	0.00452823
	10-14	668643	334775	333868		10-14	0	0		10-14	0.0155507					10-14	0.003159	0.00340539	0.00291066
	15-19	565947	282447	283500		15-19	0.000913794	0.00151293		15-19	0.0157729					15-19	0.00363387	0.00406488	0.00320446
	20-24	477269	237112	240156		20-24	0.00297994	0.00346651		20-24	0.0222301					20-24	0.00470969	0.0054442	0.0039845
	25-29	376806	186752	190054		25-29	0.00379571	0.0035706		25-29	0.0425927					25-29	0.00590786	0.0063594	0.00546418
	30-34	282928	141565	141363		30-34	0.00377345	0.00303636		30-34	0.0744134					30-34	0.0072599	0.00756689	0.00695248
	35-39	215398	96927.7	118471		35-39	0.0032654	0.00244412		35-39	0.106559					35-39	0.00901518	0.00994687	0.00825287
	40-44	197112	84326.5	112786		40-44	0.00256854	0.00195976		40-44	0.118998					40-44	0.0102525	0.0117709	0.00911718
	45-49	151718	68529.5	83188.1		45-49	0.00190344	0.00157309		45-49	0.113132					45-49	0.011564	0.0139014	0.00963852
	50-54	118679	50387.8	68290.7		50-54	0.00136429	0.00120352		50-54	0.0948256					50-54	0.0136627	0.0167055	0.0114176
	55-59	94467	39868.3	54598.7		55-59	0.00107324	0.000859966		55-59	0.0711276					55-59	0.0166606	0.0201008	0.0141407
	60-64	72009.5	31401.5	40607.6		60-64	0.000979929	0.000596728		60-64	0.0507557					60-64	0.0233553	0.0274015	0.0202162
	65-69	52684.9	23789.2	28895.8		65-69	0.00100961	0.000512607		65-69	0.0368089					65-69	0.0351077	0.0398135	0.0312335
	70-74	35237.2	15604.5	19632.7		70-74	0.000965573	0.000629125		70-74	0.0289919					70-74	0.0550839	0.0612134	0.0502121
	75-79	21116.5	9165.36	11951.1		75-79	0.000673178	0.000144619		75-79	0.0228885					75-79	0.0876529	0.0967084	0.0807438
	80+	14510.8	6226.24	8284.95		80+	0	0		80+	0.0153395					80+	0.183367	0.196479	0.173505
	Total	5.09674e+06	2.49233e+06	2.6044e+06		Total	0.00139479	0.0013811		Total	0.033945					Total	0.0116793	0.0129786	0.0104358
	2019	0	0	0		2019				2019	0					2019
	0-4	968544	489927	478617		0-4	0.000798628	0.000791081		0-4	0.009798					0-4	0.0259573	0.0294447	0.0223866
	5-9	826717	415457	411259		5-9	0	0		5-9	0.0162897					5-9	0.00484371	0.00540426	0.00427744
	10-14	691082	346141	344941		10-14	0	0		10-14	0.0154563					10-14	0.00304536	0.00328744	0.00280244
	15-19	581360	290152	291209		15-19	0.000772303	0.00127594		15-19	0.0157152					15-19	0.00358065	0.00401259	0.00315172
	20-24	492811	244809	248002		20-24	0.00252363	0.00292498		20-24	0.0214167					20-24	0.00458358	0.00533205	0.00384475
	25-29	393367	194708	198659		25-29	0.00321263	0.00300887		25-29	0.0382975					25-29	0.0057369	0.00624358	0.00524031
	30-34	297280	148364	148916		30-34	0.00319479	0.00256234		30-34	0.0677896					30-34	0.00715668	0.00748647	0.00682811
	35-39	222029	102991	119038		35-39	0.00275996	0.00206337		35-39	0.0991554					35-39	0.00911528	0.0100461	0.00830992
	40-44	198547	84885.6	113662		40-44	0.00217391	0.00165653		40-44	0.115829					40-44	0.0103817	0.0120337	0.00914783
	45-49	159690	70948.9	88740.9		45-49	0.00160448	0.0013262		45-49	0.111816					45-49	0.0116998	0.0142059	0.0096914
	50-54	121843	52798.8	69044		50-54	0.00116211	0.00101161		50-54	0.0965172					50-54	0.0137856	0.0169003	0.0113976
	55-59	97647	40702.4	56944.7		55-59	0.000903764	0.000726088		55-59	0.0731322					55-59	0.0165706	0.0201378	0.0140208
	60-64	74607.4	32227.1	42380.4		60-64	0.000834952	0.000509365		60-64	0.0526921					60-64	0.023123	0.0272929	0.0199621
	65-69	54433	24339.8	30092.7		65-69	0.000852975	0.000434719		65-69	0.0378017					65-69	0.034675	0.0394714	0.030796
	70-74	36559.5	16231.2	20328.2		70-74	0.000816003	0.00052633		70-74	0.0295134					70-74	0.0544049	0.060499	0.0495391
	75-79	21768.7	9384.19	12384.5		75-79	0.00054907	0.000139908		75-79	0.0233058					75-79	0.0865882	0.0956305	0.0797708
	80+	15035.1	6389.84	8645.7		80+	0	0		80+	0.0156142					80+	0.181975	0.194906	0.17236
	Total	5.25332e+06	2.57046e+06	2.68287e+06		Total	0.00118729	0.00116821		Total	0.0325627					Total	0.0113162	0.0125838	0.0101016
	2020	0	0	0		2020				2020						2020
	0-4	986159	498911	487249		0-4	0.000715284	0.000707764		0-4	0.00760294					0-4	0.0250964	0.0285892	0.0215191
	5-9	850907	427753	423154		5-9	0	0		5-9	0.0150711					5-9	0.0046311	0.00519229	0.00406382
	10-14	714124	357810	356313		10-14	0	0		10-14	0.0155517					10-14	0.00290069	0.00314578	0.00265456
	15-19	598027	298523	299504		15-19	0.000645792	0.00106308		15-19	0.0154884					15-19	0.00352562	0.00394135	0.00311126
	20-24	507503	252065	255437		20-24	0.00211359	0.00244076		20-24	0.020694					20-24	0.00448856	0.00524597	0.00374281
	25-29	409905	202736	207169		25-29	0.00268735	0.00251026		25-29	0.0344156					25-29	0.00559149	0.0061158	0.00508044
	30-34	312210	155351	156859		30-34	0.00267231	0.00213815		30-34	0.0609745					30-34	0.0070145	0.00733026	0.00670448
	35-39	230664	110001	120663		35-39	0.00231137	0.00172214		35-39	0.0909625					35-39	0.009113	0.00988493	0.00840928
	40-44	198856	85189.4	113666		40-44	0.00181783	0.0013803		40-44	0.110973					40-44	0.010404	0.0120108	0.00919986
	45-49	167876	73156.3	94719.4		45-49	0.00133852	0.0011055		45-49	0.109191					45-49	0.0116962	0.0141838	0.00977503
	50-54	125315	55428.6	69886.6		50-54	0.000973024	0.000846977		50-54	0.0967134					50-54	0.0138139	0.0168651	0.011394
	55-59	100876	41633.8	59241.7		55-59	0.000765818	0.000601852		55-59	0.0744763					55-59	0.0164404	0.0200343	0.0139147
	60-64	77309.9	33093	44216.8		60-64	0.00069441	0.000427025		60-64	0.0542011					60-64	0.0228753	0.0271051	0.0197096
	65-69	56249.5	24861.6	31388.3		65-69	0.000707587	0.000361995		65-69	0.0385492					65-69	0.034235	0.0391215	0.0303642
	70-74	37965.9	16888.6	21077.4		70-74	0.0006791	0.000428754		70-74	0.0297517					70-74	0.0537661	0.0598802	0.0488469
	75-79	22474.1	9632.34	12841.7		75-79	0.000481408	0.000101856		75-79	0.0235158					75-79	0.0855911	0.0946667	0.0787837
	80+	15582.4	6562.77	9019.62		80+	0	0		80+	0.0157064					80+	0.180683	0.193655	0.171244
	Total	5.412e+06	2.6496e+06	2.76241e+06		Total	0.00101159	0.000989474		Total	0.0307923					Total	0.0110179	0.0122541	0.00983216
	2021	0	0	0		2021				2021						2021
	0-4	1.00687e+06	509451	497415		0-4	0.000592984	0.000586441		0-4	0.00599191					0-4	0.0251576	0.0286558	0.0215747
	5-9	873313	439159	434153		5-9	0	0		5-9	0.0137688					5-9	0.00460863	0.0051687	0.0040421
	10-14	738453	370126	368327		10-14	0	0		10-14	0.0160583					10-14	0.00283159	0.00307096	0.00258989
	15-19	616062	307595	308466		15-19	0.000580814	0.000953694		15-19	0.0155326					15-19	0.0035638	0.00397153	0.00315723
	20-24	521595	259039	262556		20-24	0.00190103	0.00219077		20-24	0.0206671					20-24	0.00450171	0.00526387	0.00374976
	25-29	426444	210824	215620		25-29	0.00241776	0.00225127		25-29	0.0320408					25-29	0.00557391	0.00610087	0.0050567
	30-34	327651	162549	165103		30-34	0.00240299	0.00192007		30-34	0.0559788					30-34	0.00696405	0.00726971	0.00666312
	35-39	241479	118019	123460		35-39	0.00207905	0.00154452		35-39	0.085106					35-39	0.0091958	0.00980385	0.00861799
	40-44	198473	85300.4	113172		40-44	0.00163221	0.00123987		40-44	0.107779					40-44	0.0105204	0.01204	0.00937513
	45-49	175473	75202.7	100270		45-49	0.00120233	0.000990884		45-49	0.108721					45-49	0.0118171	0.0142555	0.00998398
	50-54	129575	58084.3	71490.7		50-54	0.000875483	0.000764631		50-54	0.098333					50-54	0.0139697	0.0169572	0.0115425
	55-59	104054	42799.3	61254.5		55-59	0.000681838	0.000537433		55-59	0.0775141					55-59	0.016563	0.0201539	0.014054
	60-64	80053.1	33942.9	46110.2		60-64	0.000630278	0.000381634		60-64	0.0569186					60-64	0.0229672	0.0272527	0.0198126
	65-69	58162.9	25393.2	32769.3		65-69	0.000642336	0.000322513		65-69	0.0402872					65-69	0.0342777	0.0392229	0.0304461
	70-74	39392.4	17514.5	21877.9		70-74	0.000630707	0.000397334		70-74	0.030681					70-74	0.0538579	0.0600209	0.048924
	75-79	23230.4	9921.71	13309.1		75-79	0.000417155	9.90422e-05		75-79	0.0242955					75-79	0.085603	0.0946467	0.0788902
	80+	16137.3	6737.41	9399.49		80+	0	0		80+	0.0161626					80+	0.18071	0.193744	0.171376
	Total	5.57641e+06	2.73166e+06	2.84476e+06		Total	0.000907315	0.000883144		Total	0.0297673					Total	0.0110148	0.0122192	0.00985822
	2022					2022				2022						2022
	0-4	1.03073e+06	521567	509163		0-4	0.000536275	0.000530825		0-4	0.00486271					0-4	0.0252735	0.0287893	0.0216728
	5-9	893366	449384	443982		5-9	0	0		5-9	0.0127767					5-9	0.00459412	0.00515889	0.00402248
	10-14	763809	382969	380840		10-14	0	0		10-14	0.0157923					10-14	0.00275428	0.00298683	0.00252042
	15-19	635970	317621	318348		15-19	0.000545283	0.00089443		15-19	0.0154137					15-19	0.00356984	0.00396924	0.00317134
	20-24	535528	265949	269579		20-24	0.00178722	0.00205535		20-24	0.0207473					20-24	0.00451709	0.00528367	0.00376084
	25-29	442852	218880	223971		25-29	0.00227215	0.00211226		25-29	0.0303079					25-29	0.00556793	0.00609763	0.00505028
	30-34	343456	169954	173502		30-34	0.00225825	0.00179958		30-34	0.051397					30-34	0.00688607	0.00720299	0.00657564
	35-39	254622	127082	127540		35-39	0.00195344	0.0014501		35-39	0.0795881					35-39	0.00922344	0.0097065	0.00874542
	40-44	197889	85317.3	112571		40-44	0.00153359	0.00116503		40-44	0.103656					40-44	0.0105751	0.0119927	0.00950069
	45-49	181850	77102.1	104748		45-49	0.00113188	0.000926127		45-49	0.10797					45-49	0.0118934	0.0142846	0.0101292
	50-54	134919	60629.5	74289.2		50-54	0.000829228	0.000715359		50-54	0.0992254					50-54	0.0140589	0.0170093	0.0116511
	55-59	107167	44297.6	62869.6		55-59	0.000637722	0.000510961		55-59	0.080655					55-59	0.0166845	0.0202396	0.0141796
	60-64	82810.8	34754.5	48056.8		60-64	0.00059566	0.000359099		60-64	0.0596059					60-64	0.0230336	0.0273743	0.0198943
	65-69	60204.2	25971.1	34233.1		65-69	0.000598794	0.000313792		65-69	0.0421778					65-69	0.0343012	0.0392991	0.0304971
	70-74	40815	18076.6	22738.3		70-74	0.000586491	0.000366382		70-74	0.0316931					70-74	0.0539274	0.0601288	0.0489788
	75-79	24049.2	10262.1	13787.1		75-79	0.000401304	9.65434e-05		75-79	0.0250641					75-79	0.0856391	0.0946131	0.0789595
	80+	16701.2	6913.75	9787.44		80+	0	0		80+	0.0166383					80+	0.18074	0.193842	0.171486
	Total	5.74674e+06	2.81673e+06	2.93001e+06		Total	0.000854696	0.000828391		Total	0.0287892					Total	0.0110181	0.012198	0.00988376
	2023					2023				2023						2023
	0-4	1.05847e+06	535615	522851		0-4	0.000432999	0.000429321		0-4	0.00451617					0-4	0.0253803	0.0289092	0.0217653
	5-9	912535	459161	453374		5-9	0	0		5-9	0.011202					5-9	0.00456513	0.0051388	0.0039832
	10-14	789054	395770	393283		10-14	0	0		10-14	0.0153713					10-14	0.00267639	0.00289989	0.00245148
	15-19	657056	328262	328794		15-19	0.000509453	0.000834285		15-19	0.0154377					15-19	0.0035762	0.00396872	0.00318303
	20-24	549714	272988	276727		20-24	0.00167029	0.00191996		20-24	0.0206444					20-24	0.00453424	0.00530464	0.00377425
	25-29	458695	226691	232004		25-29	0.00212458	0.00197123		25-29	0.0291624					25-29	0.00557571	0.00610496	0.00505858
	30-34	359453	177519	181934		30-34	0.00211033	0.00168029		30-34	0.0473044					30-34	0.0067924	0.00713537	0.00645776
	35-39	267593	133398	134195		35-39	0.00182788	0.00135356		35-39	0.0740371					35-39	0.00917332	0.00956865	0.00878035
	40-44	202260	90132.9	112128		40-44	0.00143647	0.001086		40-44	0.0984373					40-44	0.0106029	0.0118612	0.00958755
	45-49	184492	77831.7	106661		45-49	0.00105408	0.000869106		45-49	0.1068					45-49	0.0119395	0.0142872	0.0102224
	50-54	141440	63006	78433.8		50-54	0.000774088	0.000665558		50-54	0.0995906					50-54	0.0140926	0.0170219	0.0117397
	55-59	110122	46170.2	63951.9		55-59	0.000604628	0.000477484		55-59	0.0837385					55-59	0.016804	0.0203022	0.0142785
	60-64	85620.7	35507.8	50112.5		60-64	0.000545862	0.000336618		60-64	0.0622088					60-64	0.0230767	0.0274756	0.01996
	65-69	62372.1	26614.4	35757.2		65-69	0.00055756	0.000291704		65-69	0.0442542					65-69	0.0343216	0.0393869	0.0305519
	70-74	42228.2	18565.3	23663		70-74	0.000546325	0.000336156		70-74	0.0328083					70-74	0.053964	0.0602627	0.0490402
	75-79	24937.3	10657.2	14280.5		75-79	0.000386039	9.42821e-05		75-79	0.0258327					75-79	0.0856734	0.0945736	0.0790288
	80+	17274.4	7090.94	10183.5		80+	0	0		80+	0.017134					80+	0.180745	0.193912	0.171576
	Total	5.92331e+06	2.90498e+06	3.01833e+06		Total	0.000790754	0.000763936		Total	0.0278666					Total	0.0110213	0.0121812	0.00990495
	2024					2024				2024						2024
	0-4	1.09077e+06	551957	538811		0-4	0.000386789	0.000382715		0-4	0.00444744					0-4	0.0253919	0.0289286	0.0217696
	5-9	930294	468206	462089		5-9	0	0		5-9	0.00915333					5-9	0.00453508	0.00512212	0.00394026
	10-14	813863	408347	405516		10-14	0	0		10-14	0.015144					10-14	0.0026089	0.00282306	0.00239325
	15-19	679322	339523	339799		15-19	0.000472953	0.00077756		15-19	0.0155681					15-19	0.00356845	0.00395849	0.00317872
	20-24	564752	280477	284275		20-24	0.00155598	0.00178849		20-24	0.0206842					20-24	0.0045527	0.00532207	0.0037936
	25-29	473729	234115	239614		25-29	0.00197936	0.00183635		25-29	0.0284999					25-29	0.00558981	0.00612371	0.00506816
	30-34	375563	185212	190351		30-34	0.00196465	0.00156577		30-34	0.0437642					30-34	0.00669676	0.00707302	0.00632844
	35-39	281351	139939	141412		35-39	0.00170454	0.0012618		35-39	0.0687778					35-39	0.00906911	0.00942202	0.00871987
	40-44	208483	95882.4	112601		40-44	0.00133575	0.00101535		40-44	0.092821					40-44	0.010588	0.011695	0.00964162
	45-49	185795	78334.3	107460		45-49	0.000986491	0.000806838		45-49	0.10515					45-49	0.0119358	0.0142443	0.0102531
	50-54	148861	65219	83642.3		50-54	0.000715658	0.000622577		50-54	0.0996598					50-54	0.0140951	0.0170176	0.0118163
	55-59	112998	48357.6	64640.3		55-59	0.000554647	0.000444628		55-59	0.0863988					55-59	0.0169141	0.0203416	0.0143499
	60-64	88506.7	36243.3	52263.4		60-64	0.000511211	0.000314661		60-64	0.0647978					60-64	0.023102	0.0275628	0.0200085
	65-69	64638.1	27313.4	37325.2		65-69	0.000517927	0.00027067		65-69	0.0464815					65-69	0.0343411	0.039468	0.0306004
	70-74	43650	18997.4	24653		70-74	0.000509914	0.000326295		70-74	0.0340521					70-74	0.0539878	0.0603458	0.0490701
	75-79	25888.2	11092.8	14795.5		75-79	0.000330446	6.14354e-05		75-79	0.0265953					75-79	0.0857269	0.0946143	0.0790638
	80+	17860.8	7272.8	10588.4		80+	0	0		80+	0.017683					80+	0.180758	0.193971	0.171676
	Total	6.10632e+06	2.99649e+06	3.10984e+06		Total	0.000737801	0.000710841		Total	0.0270037					Total	0.0110134	0.012158	0.00991069
	2025					2025				2025						2025
	0-4	1.12761e+06	570596	557012		0-4	0.000299584	0.000296571		0-4	0.0043016					0-4	0.0253774	0.0289123	0.0217563
	5-9	947264	476811	470453		5-9	0	0		5-9	0.00723022					5-9	0.00450004	0.00509919	0.00389278
	10-14	837840	420519	417321		10-14	0	0		10-14	0.0144483					10-14	0.00258039	0.00278884	0.00237137
	15-19	702134	351060	351074		15-19	0.000438837	0.000721527		15-19	0.0162769					15-19	0.00344101	0.00382598	0.00305485
	20-24	581066	288648	292418		20-24	0.00144484	0.0016624		20-24	0.0206976					20-24	0.00457186	0.00533923	0.00381584
	25-29	488007	241146	246861		25-29	0.00183808	0.0017066		25-29	0.0281407					25-29	0.00562479	0.00616192	0.00510009
	30-34	391737	193020	198718		30-34	0.00182518	0.0014533		30-34	0.0408489					30-34	0.00663612	0.00704447	0.00623948
	35-39	295811	146711	149100		35-39	0.00158247	0.00117375		35-39	0.0637617					35-39	0.00896478	0.00932306	0.00861509
	40-44	216699	102585	114114		40-44	0.00124004	0.000943096		40-44	0.0871092					40-44	0.0105944	0.0115812	0.00970736
	45-49	186109	78644.9	107464		45-49	0.000913078	0.000749152		45-49	0.10282					45-49	0.0119454	0.0142205	0.0102804
	50-54	156540	67273	89266.9		50-54	0.000662909	0.000574095		50-54	0.0993787					50-54	0.0141095	0.0170349	0.0119048
	55-59	116163	50748.6	65414		55-59	0.00052592	0.000412802		55-59	0.0885426					55-59	0.0170239	0.020388	0.0144141
	60-64	91422.1	37063.8	54358.2		60-64	0.000477356	0.000283881		60-64	0.0674696					60-64	0.0231461	0.0276405	0.0200816
	65-69	66976.8	28039.6	38937.7		65-69	0.000479193	0.000250382		65-69	0.0488387					65-69	0.0343854	0.0395672	0.0306536
	70-74	45113.8	19401.1	25712.7		70-74	0.000476838	0.000298186		70-74	0.0354421					70-74	0.0539879	0.0604481	0.0491134
	75-79	26880.4	11540.2	15340.2		75-79	0.00031886	6.00219e-05		75-79	0.0273562					75-79	0.0857875	0.0946648	0.0791092
	80+	18469.7	7468.26	11001.4		80+	0	0		80+	0.0182153					80+	0.180735	0.193958	0.171759
	Total	6.29584e+06	3.09127e+06	3.20457e+06		Total	0.000677128	0.000651229		Total	0.0261711					Total	0.0110095	0.0121419	0.00991712
	2026					2026				2026						2026
	0-4	1.16546e+06	589747	575714		0-4	0.000264218	0.000261573		0-4	0.0042041					0-4	0.025349	0.0288819	0.0217293
	5-9	967171	486878	480292		5-9	0	0		5-9	0.00579054					5-9	0.00447419	0.00508015	0.00385993
	10-14	860050	431806	428243		10-14	0	0		10-14	0.013216					10-14	0.00256464	0.00277301	0.00235553
	15-19	726245	363249	362996		15-19	0.00040739	0.000669646		15-19	0.0171656					15-19	0.00333146	0.00371515	0.0029475
	20-24	598732	297510	301222		20-24	0.00134113	0.00154313		20-24	0.0206414					20-24	0.00459523	0.00535586	0.00384256
	25-29	501697	247898	253799		25-29	0.00170672	0.00158518		25-29	0.0279751					25-29	0.00567034	0.00621519	0.00513815
	30-34	407900	200882	207018		30-34	0.00169341	0.00134895		30-34	0.0385343					30-34	0.00660652	0.00704163	0.00618431
	35-39	310851	153703	157148		35-39	0.00147014	0.00108978		35-39	0.0590491					35-39	0.00885637	0.00925004	0.00847132
	40-44	227041	110266	116774		40-44	0.00115023	0.000873777		40-44	0.0815513					40-44	0.0106059	0.0114989	0.00976275
	45-49	185825	78805.6	107020		45-49	0.000851241	0.000700052		45-49	0.0996786					45-49	0.0119476	0.0141915	0.0102953
	50-54	163706	69199.1	94506.5		50-54	0.000614252	0.000536304		50-54	0.0988119					50-54	0.0141356	0.0170704	0.0119867
	55-59	120091	53177.4	66913.5		55-59	0.000489698	0.000385047		55-59	0.0900524					55-59	0.0171039	0.0204396	0.0144593
	60-64	94293.2	38099.8	56193.8		60-64	0.000444394	0.000264471		60-64	0.0702403					60-64	0.0232164	0.0277143	0.0201667
	65-69	69355.9	28753.4	40602.9		65-69	0.000458644	0.000230661		65-69	0.051256					65-69	0.0344312	0.0396932	0.0307045
	70-74	46660.1	19815.8	26843.9		70-74	0.000446472	0.000271692		70-74	0.036967					70-74	0.0539746	0.0605125	0.0491492
	75-79	27886.6	11964.3	15922.3		75-79	0.000308494	5.85373e-05		75-79	0.028169					75-79	0.0858767	0.0948254	0.0791524
	80+	19110.4	7687.52	11422.5		80+	0	0		80+	0.0188307					80+	0.1807	0.193843	0.171825
	Total	6.49207e+06	3.18944e+06	3.30263e+06		Total	0.00062865	0.000603791		Total	0.0253874					Total	0.0110102	0.0121333	0.00992551
	2027					2027				2027						2027
	0-4	1.20448e+06	609489	594993		0-4	0.000193584	0.000192014		0-4	0.00412572					0-4	0.0253255	0.0288576	0.0217072
	5-9	990156	498473	491684		5-9	0	0		5-9	0.0048125					5-9	0.00446174	0.00507366	0.00384136
	10-14	879865	441893	437973		10-14	0	0		10-14	0.0122423					10-14	0.00255711	0.00276837	0.00234396
	15-19	751432	375989	375443		15-19	0.000377777	0.000621303		15-19	0.0173282					15-19	0.00326163	0.00364464	0.00287807
	20-24	618266	307321	310944		20-24	0.00124431	0.00143503		20-24	0.0204556					20-24	0.00461155	0.005366	0.00386589
	25-29	515239	254589	260650		25-29	0.00158412	0.0014726		25-29	0.0278973					25-29	0.0057118	0.00626715	0.00516937
	30-34	423906	208701	215204		30-34	0.00157082	0.00125424		30-34	0.0367963					30-34	0.00658961	0.00704858	0.00614453
	35-39	326299	160903	165396		35-39	0.00136342	0.00101363		35-39	0.0547158					35-39	0.00872617	0.0091715	0.00829037
	40-44	239643	118947	120696		40-44	0.00107131	0.000813232		40-44	0.0762999					40-44	0.0105784	0.0114098	0.00975891
	45-49	185386	78898.2	106487		45-49	0.000786703	0.000647339		45-49	0.0956954					45-49	0.0119049	0.0140995	0.0102789
	50-54	169751	70999.1	98752.2		50-54	0.000571032	0.000496518		50-54	0.0979817					50-54	0.0141403	0.0170685	0.012035
	55-59	125054	55514.8	69539.5		55-59	0.000453049	0.000353017		55-59	0.0908764					55-59	0.0171318	0.0204592	0.0144755
	60-64	97099.7	39435.7	57664		60-64	0.000412091	0.000246414		60-64	0.0731295					60-64	0.0233024	0.0277559	0.0202567
	65-69	71751.2	29435.4	42316.2		65-69	0.000420014	0.00021116		65-69	0.0536471					65-69	0.0344603	0.0397985	0.0307467
	70-74	48311.3	20267.5	28043.8		70-74	0.00039494	0.000264327		70-74	0.0386302					70-74	0.0539592	0.0605686	0.0491826
	75-79	28892.8	12343.3	16549.5		75-79	0.000261941	5.69637e-05		75-79	0.0290318					75-79	0.0859303	0.0949775	0.0791825
	80+	19789	7935.24	11853.4		80+	0	0		80+	0.0194237					80+	0.180666	0.193735	0.171924
	Total	6.69532e+06	3.29113e+06	3.40419e+06		Total	0.000576042	0.000552968		Total	0.0246408					Total	0.011014	0.0121304	0.00993471
	2028					2028				2028						2028
	0-4	1.24477e+06	629869	614897		0-4	0.000167038	0.000165197		0-4	0.00406712					0-4	0.025307	0.0288393	0.0216887
	5-9	1.01681e+06	511888	504924		5-9	0	0		5-9	0.00454434					5-9	0.00446596	0.00508015	0.0038433
	10-14	898783	451521	447261		10-14	0	0		10-14	0.0106988					10-14	0.00254064	0.00275827	0.00232093
	15-19	776541	388706	387836		15-19	0.000348877	0.000576327		15-19	0.0173224					15-19	0.00320213	0.00358552	0.00281788
	20-24	638970	317743	321227		20-24	0.00115174	0.00133154		20-24	0.0204254					20-24	0.00462505	0.00537588	0.00388236
	25-29	529031	261404	267627		25-29	0.00146744	0.00136751		25-29	0.0276409					25-29	0.00574843	0.00631019	0.00519973
	30-34	439336	216269	223067		30-34	0.00145459	0.00116203		30-34	0.0355804					30-34	0.00658159	0.00706519	0.00611462
	35-39	341963	168259	173704		35-39	0.00126145	0.000941039		35-39	0.0508316					35-39	0.00858864	0.00909633	0.00809687
	40-44	252168	125055	127113		40-44	0.000991563	0.000755844		40-44	0.0710515					40-44	0.0104809	0.0112875	0.00969076
	45-49	189612	83506.8	106105		45-49	0.000731371	0.000602322		45-49	0.0907585					45-49	0.0118681	0.0139065	0.0102599
	50-54	172308	71720.6	100588		50-54	0.000530968	0.000458215		50-54	0.0967753					50-54	0.0141376	0.0170509	0.0120604
	55-59	131134	57704.8	73428.7		55-59	0.000418069	0.000330945		55-59	0.0911905					55-59	0.0171153	0.0204486	0.0144958
	60-64	99752.5	41104.3	58647.7		60-64	0.00037882	0.000229229		60-64	0.0759702					60-64	0.0234069	0.027787	0.0203372
	65-69	74195.7	30068.9	44126.7		65-69	0.000381344	0.000204088		65-69	0.0559878					65-69	0.0344703	0.0398785	0.0307755
	70-74	50063.2	20769.7	29293.5		70-74	0.000368405	0.000240244		70-74	0.0404654					70-74	0.0539467	0.0606178	0.0492167
	75-79	29895.1	12672.2	17223		75-79	0.000255118	5.53287e-05		75-79	0.0300123					75-79	0.0859628	0.0951279	0.0792194
	80+	20508	8211.01	12297		80+	0	0		80+	0.0200306					80+	0.180632	0.193593	0.171977
	Total	6.90584e+06	3.39647e+06	3.50936e+06		Total	0.000532828	0.000511634		Total	0.0239289					Total	0.0110165	0.0121278	0.00994088
	2029					2029				2029						2029
	0-4	1.28629e+06	650879	635413		0-4	0.000120223	0.00011902		0-4	0.00400534					0-4	0.0252901	0.0288218	0.0216725
	5-9	1.04787e+06	527512	520360		5-9	0	0		5-9	0.00454695					5-9	0.00446578	0.0050795	0.00384362
	10-14	916300	460417	455883		10-14	0	0		10-14	0.00865549					10-14	0.00252035	0.00274836	0.00229008
	15-19	801200	401192	400008		15-19	0.000321497	0.000531671		15-19	0.0174566					15-19	0.00315927	0.00354383	0.00277356
	20-24	660842	328773	332069		20-24	0.00106102	0.00122887		20-24	0.0205146					20-24	0.0046385	0.00538551	0.00389891
	25-29	543665	268668	274997		25-29	0.00135215	0.0012624		25-29	0.0275322					25-29	0.00578284	0.00635151	0.00522725
	30-34	453964	223452	230513		30-34	0.00134045	0.0010742		30-34	0.0347954					30-34	0.00657918	0.00708911	0.00608486
	35-39	357743	175733	182010		35-39	0.00116207	0.000868007		35-39	0.0474578					35-39	0.00845684	0.00902617	0.00790948
	40-44	265494	131381	134113		40-44	0.000914107	0.000699524		40-44	0.0660735					40-44	0.0103502	0.011158	0.00955564
	45-49	195598	89002.6	106595		45-49	0.000672229	0.000557269		45-49	0.0854593					45-49	0.0118156	0.0137162	0.0102247
	50-54	173626	72239.4	101387		50-54	0.00048704	0.000425442		50-54	0.0951096					50-54	0.0141062	0.0169931	0.0120492
	55-59	138063	59749.5	78313.9		55-59	0.000386507	0.000305826		55-59	0.0912119					55-59	0.0170779	0.0204315	0.0145193
	60-64	102330	43054.7	59275.3		60-64	0.000356818	0.000212412		60-64	0.0784577					60-64	0.0235067	0.0278112	0.0203871
	65-69	76709	30688.9	46020.2		65-69	0.000360309	0.000185319		65-69	0.0583419					65-69	0.0344654	0.0399452	0.0308111
	70-74	51892	21314.5	30577.6		70-74	0.00034292	0.000217323		70-74	0.0424329					70-74	0.0539452	0.0606834	0.0492482
	75-79	30908.1	12963.7	17944.5		75-79	0.000213848	5.36997e-05		75-79	0.0311072					75-79	0.08595	0.0952506	0.0792309
	80+	21263.5	8506.75	12756.7		80+	0	0		80+	0.0206258					80+	0.180648	0.193556	0.172041
	Total	7.12376e+06	3.50553e+06	3.61824e+06		Total	0.000485903	0.000467106		Total	0.0232519					Total	0.0110173	0.0121256	0.00994345
	2030					2030				2030						2030
	0-4	1.32901e+06	672491	656520		0-4	9.07818e-05	8.98104e-05		0-4	0.00395879					0-4	0.0252701	0.0288009	0.0216527
	5-9	1.08338e+06	545384	538001		5-9	0	0		5-9	0.00456622					5-9	0.00446059	0.00507277	0.00384
	10-14	933042	468882	464160		10-14	0	0		10-14	0.00677154					10-14	0.00249562	0.00273227	0.00225657
	15-19	825031	413275	411756		15-19	0.000294584	0.000489415		15-19	0.0168962					15-19	0.00315351	0.0035379	0.0027677
	20-24	683248	340073	343175		20-24	0.000972377	0.00112996		20-24	0.0213332					20-24	0.00462632	0.00537274	0.00388665
	25-29	559559	276601	282958		25-29	0.00123902	0.00116078		25-29	0.027419					25-29	0.00580159	0.00637674	0.00524087
	30-34	467853	230249	237603		30-34	0.00122933	0.000985741		30-34	0.0342931					30-34	0.00657187	0.00710868	0.0060517
	35-39	373564	183310	190253		35-39	0.00106494	0.000796771		35-39	0.0446783					35-39	0.00833529	0.00895442	0.00773875
	40-44	279543	137932	141611		40-44	0.000840344	0.000641307		40-44	0.0613707					40-44	0.0101766	0.0110162	0.00935872
	45-49	203478	95399.2	108079		45-49	0.000616356	0.000511842		45-49	0.0801118					45-49	0.011738	0.013518	0.0101669
	50-54	174030	72588.2	101442		50-54	0.000446694	0.000392432		50-54	0.0928719					50-54	0.0140393	0.016888	0.0120008
	55-59	145241	61652.7	83588		55-59	0.000349914	0.000277836		55-59	0.0909329					55-59	0.017021	0.0203866	0.0145386
	60-64	105175	45185.6	59989.2		60-64	0.0003193	0.000196172		60-64	0.0804929					60-64	0.0235777	0.0278068	0.0203924
	65-69	79244.9	31384	47861.3		65-69	0.000322813	0.000167539		65-69	0.0607974					65-69	0.034467	0.039981	0.030851
	70-74	53776.9	21878.7	31897.8		70-74	0.000318023	0.000195314		70-74	0.0445581					70-74	0.0539507	0.0607497	0.049288
	75-79	31954.7	13238.2	18716.5		75-79	0.000210015	5.21404e-05		75-79	0.0323417					75-79	0.0859008	0.0952977	0.0792544
	80+	22047.4	8810.14	13237.3		80+	0	0		80+	0.0212725					80+	0.180662	0.193595	0.172054
	Total	7.34918e+06	3.61833e+06	3.73085e+06		Total	0.000442988	0.000426383		Total	0.0226144					Total	0.0110124	0.0121182	0.00994001
	2031					2031				2031						2031
	0-4	1.37283e+06	694661	678173		0-4	5.53072e-05	5.50264e-05		0-4	0.00391989					0-4	0.0252465	0.0287773	0.0216299
	5-9	1.11987e+06	563745	556128		5-9	0	0		5-9	0.004582					5-9	0.00445602	0.00506659	0.00383709
	10-14	952657	478778	473879		10-14	0	0		10-14	0.00538841					10-14	0.00247011	0.00271218	0.00222553
	15-19	847096	424472	422624		15-19	0.000179339	0.000298239		15-19	0.0156824					15-19	0.00316065	0.00354568	0.00277394
	20-24	706955	352023	354932		20-24	0.000589557	0.000686622		20-24	0.0223687					20-24	0.00460522	0.00535211	0.00386445
	25-29	576779	285211	291568		25-29	0.000751646	0.000704822		25-29	0.0272778					25-29	0.0058015	0.00638089	0.00523475
	30-34	481177	236779	244398		30-34	0.000744739	0.000599574		30-34	0.0339955					30-34	0.00654796	0.0071154	0.00599994
	35-39	389345	190930	198415		35-39	0.00064614	0.000483829		35-39	0.0424959					35-39	0.00821351	0.00887303	0.00757887
	40-44	294185	144694	149491		40-44	0.000508662	0.000389826		40-44	0.0570263					40-44	0.00997051	0.0108508	0.00911843
	45-49	213381	102718	110663		45-49	0.000372715	0.000312334		45-49	0.0749798					45-49	0.0116274	0.0133037	0.0100715
	50-54	173884	72805.8	101078		50-54	0.000273394	0.000239551		50-54	0.0899803					50-54	0.0139337	0.0167267	0.011922
	55-59	151947	63442	88504.6		55-59	0.000213225	0.000167955		55-59	0.0904565					55-59	0.0169549	0.020314	0.0145471
	60-64	108731	47352.7	61378.2		60-64	0.000195509	0.000117501		60-64	0.0820022					60-64	0.0235922	0.0277905	0.0203532
	65-69	81732.8	32264.5	49468.3		65-69	0.000199427	9.92867e-05		65-69	0.0634047					65-69	0.0344889	0.03997	0.0309139
	70-74	55693.3	22432	33261.3		70-74	0.000193118	0.000124963		70-74	0.0467579					70-74	0.0539483	0.0608236	0.0493114
	75-79	33062.9	13521.6	19541.3		75-79	0.00013623	3.33482e-05		75-79	0.0337189					75-79	0.0858233	0.0953114	0.0792581
	80+	22850.5	9107.15	13743.4		80+	0	0		80+	0.0219625					80+	0.180709	0.193767	0.172057
	Total	7.58218e+06	3.73494e+06	3.84725e+06		Total	0.000269205	0.000259618		Total	0.0220182					Total	0.0109994	0.0121019	0.00992909
	2032					2032				2032						2032
	0-4	1.4176e+06	717309	700295		0-4	5.14608e-05	5.07867e-05		0-4	0.00386369					0-4	0.0252264	0.028756	0.0216105
	5-9	1.15747e+06	582661	574808		5-9	0	0		5-9	0.00459296					5-9	0.00445261	0.00506253	0.0038351
	10-14	975307	490177	485131		10-14	0	0		10-14	0.0044437					10-14	0.002455	0.00270112	0.00220632
	15-19	866718	434444	432274		15-19	0.000169644	0.000282474		15-19	0.0147022					15-19	0.00315626	0.00354058	0.00277001
	20-24	731772	364541	367232		20-24	0.000556197	0.000649129		20-24	0.0227033					20-24	0.00456517	0.00531402	0.0038218
	25-29	595844	294756	301088		25-29	0.000709666	0.000667327		25-29	0.0270687					25-29	0.00578489	0.00636599	0.0052146
	30-34	494368	243255	251114		30-34	0.000703411	0.000567369		30-34	0.0338145					30-34	0.00651849	0.00711114	0.0059427
	35-39	404948	198499	206449		35-39	0.000609673	0.000457773		35-39	0.040877					35-39	0.0081111	0.0088044	0.00744449
	40-44	309238	151656	157582		40-44	0.000481181	0.000370221		40-44	0.053098					40-44	0.00976546	0.0106917	0.00887134
	45-49	225442	110977	114466		45-49	0.000354395	0.000295954		45-49	0.0702002					45-49	0.0115048	0.0131061	0.00994855
	50-54	173599	72968.5	100630		50-54	0.000257185	0.000226376		50-54	0.0863875					50-54	0.0138097	0.0165322	0.0118357
	55-59	157612	65118.3	92494.1		55-59	0.000202925	0.000161989		55-59	0.0897953					55-59	0.0168954	0.0202283	0.014549
	60-64	113249	49441.6	63807.8		60-64	0.00018081	0.000111856		60-64	0.0829099					60-64	0.0235476	0.0277594	0.0202841
	65-69	84151	33401.1	50749.9		65-69	0.000186681	9.59309e-05		65-69	0.0661615					65-69	0.034543	0.0399328	0.0309957
	70-74	57624.1	22959.7	34664.4		70-74	0.000176808	0.00011101		70-74	0.0489763					70-74	0.0539399	0.0609061	0.0493258
	75-79	34246.7	13830.5	20416.2		75-79	0.000112244	3.24458e-05		75-79	0.0352554					75-79	0.0857476	0.0953332	0.0792541
	80+	23668.5	9390.14	14278.3		80+	0	0		80+	0.0226771					80+	0.180748	0.193945	0.172068
	Total	7.82286e+06	3.85539e+06	3.96748e+06		Total	0.000254518	0.000245882		Total	0.0214599					Total	0.0109818	0.0120803	0.00991425
	2033					2033				2033						2033
	0-4	1.46316e+06	740353	722802		0-4	4.78058e-05	4.71192e-05		0-4	0.00379537					0-4	0.0252011	0.0287305	0.0215865
	5-9	1.19627e+06	602186	594088		5-9	0	0		5-9	0.00461629					5-9	0.00445062	0.00505928	0.00383366
	10-14	1.00158e+06	503368	498207		10-14	0	0		10-14	0.00417447					10-14	0.00245383	0.00270124	0.00220385
	15-19	885409	443942	441466		15-19	0.000160221	0.000266934		15-19	0.0131779					15-19	0.0031381	0.0035213	0.00275276
	20-24	756527	377040	379486		20-24	0.000523961	0.000612819		20-24	0.0228985					20-24	0.00452194	0.00527309	0.00377677
	25-29	616064	304902	311163		25-29	0.000667927	0.00063079		25-29	0.0270455					25-29	0.00575986	0.00634648	0.00518505
	30-34	507810	249857	257953		30-34	0.00066217	0.000535997		30-34	0.0335107					30-34	0.00648401	0.0070967	0.00589055
	35-39	419973	205817	214156		35-39	0.000572905	0.000432208		35-39	0.0397658					35-39	0.0080263	0.00874734	0.00733332
	40-44	324504	158766	165738		40-44	0.000453215	0.000349308		40-44	0.0496375					40-44	0.00957449	0.0105475	0.00864244
	45-49	237507	116840	120668		45-49	0.000332539	0.000278843		45-49	0.0655243					45-49	0.0113247	0.0128921	0.00980693
	50-54	177649	77337.9	100311		50-54	0.000241977	0.000212322		50-54	0.081979					50-54	0.0137365	0.0162739	0.0117802
	55-59	160034	65807.5	94226.9		55-59	0.000188672	0.000152526		55-59	0.0888499					55-59	0.0168601	0.0201585	0.014552
	60-64	118798	51402.1	67396.2		60-64	0.000173789	0.000106919		60-64	0.0833622					60-64	0.0234742	0.0277174	0.0202381
	65-69	86422.1	34819.9	51602.2		65-69	0.000173436	9.26654e-05		65-69	0.0689223					65-69	0.0346333	0.0399043	0.0310766
	70-74	59597.8	23449.7	36148.6		70-74	0.000175084	0.000107267		70-74	0.0511913					70-74	0.0539145	0.0609564	0.0493459
	75-79	35500.2	14174.2	21325.9		75-79	0.000111254	3.15957e-05		75-79	0.0369536					75-79	0.0857003	0.0953295	0.0792803
	80+	24503	9658.26	14844.7		80+	0	0		80+	0.0234862					80+	0.180765	0.194149	0.172057
	Total	8.0713e+06	3.97972e+06	4.09158e+06		Total	0.000240004	0.000232393		Total	0.0209406					Total	0.0109608	0.0120545	0.00989694
	2034					2034				2034						2034
	0-4	1.50932e+06	763708	745614		0-4	4.39947e-05	4.36379e-05		0-4	0.00370046					0-4	0.0251757	0.0287037	0.0215621
	5-9	1.23627e+06	622313	613961		5-9	0	0		5-9	0.00461446					5-9	0.00444822	0.00505611	0.00383207
	10-14	1.0322e+06	518743	513452		10-14	0	0		10-14	0.00419838					10-14	0.00244978	0.00269654	0.00220048
	15-19	902696	452704	449992		15-19	0.000150407	0.000252072		15-19	0.0111513					15-19	0.00314108	0.00352354	0.00275631
	20-24	780817	389303	391514		20-24	0.000491894	0.000577594		20-24	0.023228					20-24	0.00448304	0.00523578	0.00373454
	25-29	637444	315646	321798		25-29	0.000627538	0.000594617		25-29	0.0271639					25-29	0.00573133	0.0063243	0.00514969
	30-34	522077	256904	265173		30-34	0.000622424	0.000504925		30-34	0.0333914					30-34	0.00644193	0.00706909	0.00583432
[truncated: 315 more rows]

## Sheet: Maputo Province, part 1
	Input	Data		Reference
[truncated: 19 more rows]

[truncated: 3 more sheets: Maputo Province, part 2, Maputo City, part 1, Maputo City, part 2]
